# Supplementary material
Source: publisher figshare collection journal article supplement (https://acs.figshare.com/ndownloader/files/5700579)
Supplement: Supplementary file 1 [file 5700579]

              ########################################
              #                                      #
              #   CIF generated by the Xtal System   #
              #                                      #
              ########################################
 
data_global
 
_audit_creation_method                 Xtal3.7
_audit_creation_date                   02-12-12
_audit_update_record                   ?
 
#==============================================================================
#   (Publishing Staff Use Only)
 
_journal_date_recd_electronic          ?
_journal_date_to_coeditor              ?
_journal_date_from_coeditor            ?
_journal_date_accepted                 ?
_journal_date_printers_first           ?
_journal_date_printers_final           ?
_journal_date_proofs_out               ?
_journal_date_proofs_in                ?
_journal_coeditor_name                 ?
_journal_coeditor_code                 ?
_journal_coeditor_notes
; ?
;
_journal_techeditor_code               ?
_journal_techeditor_notes
; ?
;
_journal_coden_ASTM                    ?
_journal_name_full                     ?
_journal_year                          ?
_journal_volume                        ?
_journal_issue                         ?
_journal_page_first                    ?
_journal_page_last                     ?
_journal_suppl_publ_number             ?
_journal_suppl_publ_pages              ?
 
#=======================================================================
 
# 1. SUBMISSION DETAILS
#----------------------
 
_publ_contact_author_name              ?    #<< name in format "Smith, X. W."
_publ_contact_author_address                #<< address of contact author
;    ?
;
_publ_contact_author_email             ?
_publ_contact_author_fax               ?
_publ_contact_author_phone             ?
 
_publ_contact_letter                        #<< contact letter
;    ?
;
 
_publ_requested_journal                ?    #<< journal name e.g. "Section C"
_publ_requested_category               ?    #<< paper category e.g. "FO"
 
 
_publ_section_title                         #<< paper title text
;    ?
;
_publ_section_title_footnote                #<< paper footnote text
;    ?
;
 
loop_
_publ_author_name
_publ_author_footnote
_publ_author_address                       #<< complete address as text
     ?                                     #<< author name e.g. "Jones, X.W."
     ?                                     #<< footnote otherwise leave as ?
;    ?
;
 
_publ_section_synopsis                     #<< synopsis if FI,CI,CM,CO papers
;    ?
;
_publ_section_abstract                     #<< abstract text
;    ?
;
_publ_section_comment                      #<< scientific commentary text
;    ?
;
_publ_section_acknowledgements             #<< acknowledgements text
;    ?
;
_publ_section_references                   #<< references text
;    ?
;
_publ_section_figure_captions              #<< figure captions
;    ?
;
 
 
#=======================================================================
#  Data block for single structure (one for each study in the paper)
#=======================================================================
 
 
data_gr1c
 
 
# 2. EXPERIMENTAL DATA
#---------------------
 
 
_publ_section_exptl_prep      #<< material & crystal preparation text
;    ?
;
 
_publ_section_exptl_refinement                #<< crystallographic methods used
;    ?
;
 
_chemical_formula_sum                 'C14 H10 F3 N2 O7 Re1 S1'
_chemical_formula_moiety               ?
_chemical_formula_weight               593.51
_chemical_melting_point                ?
 
_symmetry_cell_setting                 monoclinic
_symmetry_space_group_name_H-M         P_1_21/n_1
_symmetry_space_group_name_Hall        -p_2yn
 
loop_
_symmetry_equiv_pos_as_xyz
  +x,+y,+z  1/2-x,1/2+y,1/2-z  -x,-y,-z  1/2+x,1/2-y,1/2+z
 
_cell_length_a                         10.8342(14)
_cell_length_b                         9.8398(12)
_cell_length_c                         17.719(2)
_cell_angle_alpha                      90.00000
_cell_angle_beta                       92.316(2)
_cell_angle_gamma                      90.00000
_cell_volume                           1887.4(4)
_cell_formula_units_Z                  4
 
_exptl_crystal_density_diffrn          2.089
_exptl_crystal_density_meas            ?
_exptl_crystal_density_method          ?
_diffrn_radiation_type                'Mo K\a'
_diffrn_radiation_wavelength           .71073
 
_cell_measurement_reflns_used          ?
_cell_measurement_theta_min            ?
_cell_measurement_theta_max            ?
_cell_measurement_temperature          293
 
_exptl_absorpt_coefficient_mu          6.617
_exptl_crystal_description             ?
_exptl_crystal_size_max                ?
_exptl_crystal_size_mid                ?
_exptl_crystal_size_min                ?
_exptl_crystal_size_rad                ?
_exptl_crystal_colour                  ?
 
_diffrn_measurement_device_type        ?
_diffrn_measurement_method             ?
_diffrn_detector_area_resol_mean       ?
 
_exptl_absorpt_correction_type         ?
_exptl_absorpt_process_details         ?
_exptl_absorpt_correction_T_min        ?
_exptl_absorpt_correction_T_max        ?
 
_diffrn_reflns_number                  4767
_reflns_number_total                   4757
_reflns_Friedel_coverage               0
_reflns_number_gt                      3495
_reflns_threshold_expression          'Fsqd >  .00 sig(Fsqd)'
 
_diffrn_reflns_theta_max               29.12
_diffrn_reflns_theta_full              ?
_diffrn_measured_fraction_theta_max    ?
_diffrn_measured_fraction_theta_full   ?
_diffrn_reflns_av_R_equivalents        .272
_diffrn_reflns_limit_h_min             -14
_diffrn_reflns_limit_h_max             14
_diffrn_reflns_limit_k_min             0
_diffrn_reflns_limit_k_max             13
_diffrn_reflns_limit_l_min             0
_diffrn_reflns_limit_l_max             23
_diffrn_standards_number               ?
_diffrn_standards_interval_count       ?
_diffrn_standards_interval_time        ?            #<< do not append units
_diffrn_standards_decay_%              ?            #<< do not append %
 
 
_refine_ls_structure_factor_coef       Fsqd
_refine_ls_R_factor_gt                 .044
_refine_ls_wR_factor_ref               .083
_refine_ls_goodness_of_fit_ref         1.077
_refine_ls_number_reflns               3495
_refine_ls_number_parameters           248
_refine_ls_weighting_scheme            calc
_refine_ls_weighting_details           ?
_refine_ls_hydrogen_treatment          ?
_refine_ls_shift/su_max                .085
_refine_diff_density_min               -1.318
_refine_diff_density_max               2.522
 
_refine_ls_extinction_method           Zachariasen
_refine_ls_extinction_coef             814(82)
_refine_ls_abs_structure_details       ?
_refine_ls_abs_structure_Flack         ?
 
 
# 3. Information for the "methods" section
#-----------------------------------------
 
_computing_data_collection             ?
_computing_cell_refinement             ?
_computing_data_reduction             'xtal ADDREF SORTRF'
_computing_structure_solution          xtal
_computing_structure_refinement       'xtal CRYLSQ'
_computing_molecular_graphics          xtal
_computing_publication_material       'xtal BONDLA CIFIO'
 
 
# 4. Supplementary data for validation and tables
#------------------------------------------------
 
loop_
_atom_type_symbol
_atom_type_description
_atom_type_oxidation_number
_atom_type_number_in_cell
_atom_type_scat_dispersion_real
_atom_type_scat_dispersion_imag
_atom_type_scat_source
  C  ?  0  56  .002  .002  'Int Tables Vol IV Tables 2.2B and 2.3.1'
  N  ?  0  8  .004  .003  'Int Tables Vol IV Tables 2.2B and 2.3.1'
  O  ?  0  28  .008  .006  'Int Tables Vol IV Tables 2.2B and 2.3.1'
  H  ?  0  40  0  0  'Int Tables Vol IV Tables 2.2B and 2.3.1'
  S  ?  0  4  .11  .124  'Int Tables Vol IV Tables 2.2B and 2.3.1'
  F  ?  0  12  .014  .01  'Int Tables Vol IV Tables 2.2B and 2.3.1'
  Re  ?  0  4   -1.598   7.232  'Int Tables Vol IV Tables 2.2B and 2.3.1'
 
loop_
_atom_site_label
_atom_site_fract_x
_atom_site_fract_y
_atom_site_fract_z
_atom_site_U_iso_or_equiv
_atom_site_adp_type
_atom_site_calc_flag
_atom_site_calc_attached_atom
_atom_site_occupancy
_atom_site_disorder_assembly
_atom_site_disorder_group
  Re1  .74866(3)  .72141(3)  .64053(2)  .0479(2)  Uani  ?  ?  1.00000  ?  ?
  O4  .6115(5)  .6528(6)  .5547(3)  .069(4)  Uani  ?  ?  1.00000  ?  ?
  N2  .8297(5)  .8077(6)  .5416(3)  .048(4)  Uani  ?  ?  1.00000  ?  ?
  N1  .6509(6)  .9101(6)  .6202(3)  .050(4)  Uani  ?  ?  1.00000  ?  ?
  C9  .7792(7)  .9277(8)  .5161(4)  .049(5)  Uani  ?  ?  1.00000  ?  ?
  C8  .6823(7)  .9849(8)  .5607(4)  .050(5)  Uani  ?  ?  1.00000  ?  ?
  O2  .8801(7)  .4471(7)  .6485(4)  .104(6)  Uani  ?  ?  1.00000  ?  ?
  C10  .8233(8)  .9879(9)  .4507(5)  .060(6)  Uani  ?  ?  1.00000  ?  ?
  C7  .6251(8)  1.1074(9)  .5435(5)  .068(6)  Uani  ?  ?  1.00000  ?  ?
  O3  .6205(7)  .6335(7)  .7824(4)  .110(6)  Uani  ?  ?  1.00000  ?  ?
  C2  .8336(9)  .5508(10)  .6451(5)  .072(7)  Uani  ?  ?  1.00000  ?  ?
  O1  .9448(8)  .8365(7)  .7492(5)  .126(6)  Uani  ?  ?  1.00000  ?  ?
  C13  .9213(8)  .7496(8)  .5038(5)  .062(6)  Uani  ?  ?  1.00000  ?  ?
  C3  .6645(8)  .6647(8)  .7272(5)  .064(6)  Uani  ?  ?  1.00000  ?  ?
  C5  .4979(8)  1.0761(10)  .6481(6)  .073(7)  Uani  ?  ?  1.00000  ?  ?
  C11  .9175(9)  .9272(10)  .4132(5)  .069(7)  Uani  ?  ?  1.00000  ?  ?
  C4  .5585(8)  .9574(9)  .6622(4)  .063(6)  Uani  ?  ?  1.00000  ?  ?
  C12  .9662(8)  .8085(10)  .4399(6)  .072(7)  Uani  ?  ?  1.00000  ?  ?
  C1  .8696(10)  .7940(9)  .7083(6)  .075(7)  Uani  ?  ?  1.00000  ?  ?
  C6  .5325(9)  1.1532(10)  .5891(6)  .077(7)  Uani  ?  ?  1.00000  ?  ?
  S  .7172(3)  .4190(3)  .40591(17)  .085(2)  Uani  ?  ?  1.00000  ?  ?
  C14  .7509(14)  .507(2)  .3118(13)  .182(19)  Uani  ?  ?  1.00000  ?  ?
  O5a  .738(3)  .506(3)  .4583(15)  .201(10)  Uiso  ?  ?  .50000  ?  ?
  O6a  .820(2)  .320(3)  .3943(15)  .203(9)  Uiso  ?  ?  .50000  ?  ?
  O7a  .6148(17)  .338(2)  .3952(10)  .125(6)  Uiso  ?  ?  .50000  ?  ?
  O5b  .8144(15)  .4327(16)  .4621(9)  .105(5)  Uiso  ?  ?  .50000  ?  ?
  O6b  .687(2)  .281(2)  .3822(11)  .134(6)  Uiso  ?  ?  .50000  ?  ?
  O7b  .6019(18)  .4978(19)  .4216(11)  .144(6)  Uiso  ?  ?  .50000  ?  ?
  F1a  .8637(15)  .5137(19)  .3110(8)  .122(5)  Uiso  ?  ?  .50000  ?  ?
  F2a  .695(2)  .456(2)  .2637(11)  .133(6)  Uiso  ?  ?  .50000  ?  ?
  F3a  .7122(15)  .6472(18)  .3417(9)  .149(5)  Uiso  ?  ?  .50000  ?  ?
  F1b  .658(2)  .514(3)  .2777(16)  .197(11)  Uiso  ?  ?  .50000  ?  ?
  F2b  .822(2)  .593(2)  .3218(10)  .156(7)  Uiso  ?  ?  .50000  ?  ?
  F3b  .820(2)  .372(3)  .2943(15)  .260(11)  Uiso  ?  ?  .50000  ?  ?
  H4a  .65035  .58515  .51883  .10000  Uiso  ?  ?  1.00000  ?  ?
  H4b  .54054  .60318  .57987  .09600  Uiso  ?  ?  1.00000  ?  ?
  H13  .96150  .65524  .52448  .09000  Uiso  ?  ?  1.00000  ?  ?
  H12  1.04248  .76176  .41285  .10700  Uiso  ?  ?  1.00000  ?  ?
  H11  .95054  .97145  .36380  .10800  Uiso  ?  ?  1.00000  ?  ?
  H10  .78350  1.08478  .43206  .09000  Uiso  ?  ?  1.00000  ?  ?
  H7  .65283  1.16755  .49591  .04200  Uiso  ?  ?  1.00000  ?  ?
  H6  .48956  1.24929  .57659  .04200  Uiso  ?  ?  1.00000  ?  ?
  H5  .42225  1.10953  .67890  .25000  Uiso  ?  ?  1.00000  ?  ?
  H4  .53060  .89794  .71064  .04200  Uiso  ?  ?  1.00000  ?  ?
 
loop_
_atom_site_aniso_label
_atom_site_aniso_U_11
_atom_site_aniso_U_22
_atom_site_aniso_U_33
_atom_site_aniso_U_12
_atom_site_aniso_U_13
_atom_site_aniso_U_23
  Re1  .0540(2)  .0452(2)  .0445(2)  -.00041(18)  .00210(14)  .00094(18)
  O4  .058(4)  .082(4)  .069(4)  -.017(3)  .005(3)  -.010(3)
  N2  .036(4)  .056(5)  .053(4)  -.003(3)  .005(3)  -.001(3)
  N1  .067(5)  .048(4)  .037(4)  .003(3)  .008(3)  -.002(3)
  C9  .057(5)  .045(5)  .045(5)  -.003(4)  -.007(4)  .005(4)
  C8  .056(5)  .050(5)  .044(5)  .006(4)  .002(4)  -.002(4)
  O2  .129(7)  .066(5)  .116(6)  .038(5)  -.000(5)  .012(4)
  C10  .058(6)  .069(6)  .052(6)  -.006(5)  .002(5)  .004(5)
  C7  .077(7)  .060(6)  .066(6)  .017(5)  -.004(5)  .014(5)
  O3  .178(8)  .075(5)  .083(5)  -.021(5)  .068(5)  .003(4)
  C2  .089(8)  .070(7)  .058(6)  .017(6)  .010(5)  .007(5)
  O1  .161(8)  .072(5)  .137(7)  -.016(5)  -.092(6)  .011(5)
  C13  .053(5)  .070(7)  .063(6)  .004(4)  .014(5)  -.002(5)
  C3  .083(7)  .046(5)  .066(6)  -.002(5)  .015(5)  -.012(5)
  C5  .069(7)  .080(8)  .071(7)  .016(5)  .004(5)  -.008(6)
  C11  .069(7)  .083(7)  .057(6)  -.016(6)  .013(5)  .003(5)
  C4  .064(6)  .081(7)  .044(5)  .014(5)  .006(5)  -.002(5)
  C12  .057(6)  .085(8)  .076(7)  -.004(5)  .024(5)  -.010(6)
  C1  .090(8)  .054(6)  .079(7)  -.000(5)  -.025(6)  .006(5)
  C6  .079(7)  .068(7)  .082(7)  .035(6)  -.005(6)  -.002(6)
  S  .093(2)  .083(2)  .080(2)  -.0080(18)  .0078(17)  .0001(16)
  C14  .067(12)  .163(17)  .31(3)  -.044(11)  -.028(13)  -.012(18)
 
 
# 5. Molecular Geometry
#----------------------
 
loop_
_geom_bond_atom_site_label_1
_geom_bond_atom_site_label_2
_geom_bond_site_symmetry_1
_geom_bond_site_symmetry_2
_geom_bond_distance
_geom_bond_publ_flag                 #<< enter y(es) for value to be published
  Re1  C1  .  .  1.882(10)  ?
  Re1  C3  .  .  1.901(9)  ?
  Re1  C2  .  .  1.914(10)  ?
  Re1  N1  .  .  2.161(6)  ?
  Re1  N2  .  .  2.165(6)  ?
  Re1  O4  .  .  2.190(5)  ?
  O4  H4a  .  .  1.023(6)  ?
  O4  H4b  .  .  1.028(5)  ?
  N2  C13  .  .  1.347(10)  ?
  N2  C9  .  .  1.370(10)  ?
  N1  C8  .  .  1.341(10)  ?
  N1  C4  .  .  1.353(11)  ?
  C9  C10  .  .  1.402(12)  ?
  C9  C8  .  .  1.453(11)  ?
  C8  C7  .  .  1.384(12)  ?
  O2  C2  .  .  1.139(12)  ?
  C10  H10  .  .  1.092(8)  ?
  C10  C11  .  .  1.376(13)  ?
  C7  H7  .  .  1.082(9)  ?
  C7  C6  .  .  1.389(13)  ?
  O3  C3  .  .  1.148(12)  ?
  O1  C1  .  .  1.147(13)  ?
  C13  H13  .  .  1.083(8)  ?
  C13  C12  .  .  1.379(13)  ?
  C5  H5  .  .  1.055(10)  ?
  C5  C6  .  .  1.356(14)  ?
  C5  C4  .  .  1.358(13)  ?
  C11  H11  .  .  1.053(9)  ?
  C11  C12  .  .  1.358(14)  ?
  C4  H4  .  .  1.092(8)  ?
  C12  H12  .  .  1.075(9)  ?
  C6  H6  .  .  1.073(10)  ?
  S  O5a  .  .  1.28(3)  ?
  S  O7a  .  .  1.37(2)  ?
  S  O5b  .  .  1.427(16)  ?
  S  O6b  .  .  1.45(2)  ?
  S  O6a  .  .  1.50(3)  ?
  S  O7b  .  .  1.51(2)  ?
  S  C14  .  .  1.93(2)  ?
  C14  F2a  .  .  1.14(3)  ?
  C14  F1b  .  .  1.15(3)  ?
  C14  F2b  .  .  1.16(3)  ?
  C14  F1a  .  .  1.23(2)  ?
  C14  F3a  .  .  1.54(3)  ?
  C14  F3b  .  .  1.57(4)  ?
  O5a  O5b  .  .  1.10(3)  ?
  O5a  O7b  .  .  1.59(3)  ?
  O6a  O6b  .  .  1.49(3)  ?
  O6a  O5b  .  .  1.64(3)  ?
  O7a  O6b  .  .  .99(3)  ?
  O7a  O7b  .  .  1.65(3)  ?
  F1a  F2b  .  .  .93(3)  ?
  F1a  F3b  .  .  1.50(3)  ?
  F2a  F1b  .  .  .74(4)  ?
  F3a  F2b  .  .  1.36(3)  ?
 
loop_
_geom_angle_atom_site_label_1
_geom_angle_atom_site_label_2
_geom_angle_atom_site_label_3
_geom_angle_site_symmetry_1
_geom_angle_site_symmetry_2
_geom_angle_site_symmetry_3
_geom_angle
_geom_angle_publ_flag                #<< enter yes for value to be published
  C1  Re1  C3  .  .  .  86.6(4)  ?
  C1  Re1  C2  .  .  .  89.1(4)  ?
  C1  Re1  N1  .  .  .  96.0(3)  ?
  C1  Re1  N2  .  .  .  94.2(3)  ?
  C1  Re1  O4  .  .  .  174.6(3)  ?
  C3  Re1  C2  .  .  .  87.3(4)  ?
  C3  Re1  N1  .  .  .  98.0(3)  ?
  C3  Re1  N2  .  .  .  172.9(3)  ?
  C3  Re1  O4  .  .  .  97.8(3)  ?
  C2  Re1  N1  .  .  .  172.8(3)  ?
  C2  Re1  N2  .  .  .  99.7(3)  ?
  C2  Re1  O4  .  .  .  94.1(3)  ?
  N1  Re1  N2  .  .  .  75.0(2)  ?
  N1  Re1  O4  .  .  .  80.5(2)  ?
  N2  Re1  O4  .  .  .  81.0(2)  ?
  H4a  O4  H4b  .  .  .  107.1(5)  ?
  H4a  O4  Re1  .  .  .  110.3(4)  ?
  H4b  O4  Re1  .  .  .  110.1(4)  ?
  C13  N2  C9  .  .  .  119.6(7)  ?
  C13  N2  Re1  .  .  .  124.5(5)  ?
  C9  N2  Re1  .  .  .  115.8(5)  ?
  C8  N1  C4  .  .  .  117.4(7)  ?
  C8  N1  Re1  .  .  .  117.6(5)  ?
  C4  N1  Re1  .  .  .  125.0(5)  ?
  N2  C9  C10  .  .  .  119.5(7)  ?
  N2  C9  C8  .  .  .  116.2(7)  ?
  C10  C9  C8  .  .  .  124.3(7)  ?
  N1  C8  C7  .  .  .  121.7(7)  ?
  N1  C8  C9  .  .  .  115.3(7)  ?
  C7  C8  C9  .  .  .  123.0(7)  ?
  H10  C10  C11  .  .  .  121.7(8)  ?
  H10  C10  C9  .  .  .  118.3(8)  ?
  C11  C10  C9  .  .  .  119.9(8)  ?
  H7  C7  C8  .  .  .  120.8(8)  ?
  H7  C7  C6  .  .  .  120.4(8)  ?
  C8  C7  C6  .  .  .  118.8(8)  ?
  O2  C2  Re1  .  .  .  177.5(9)  ?
  H13  C13  N2  .  .  .  119.4(8)  ?
  H13  C13  C12  .  .  .  119.2(8)  ?
  N2  C13  C12  .  .  .  121.4(8)  ?
  O3  C3  Re1  .  .  .  175.4(8)  ?
  H5  C5  C6  .  .  .  117.9(9)  ?
  H5  C5  C4  .  .  .  123.6(9)  ?
  C6  C5  C4  .  .  .  118.4(9)  ?
  H11  C11  C12  .  .  .  120.3(9)  ?
  H11  C11  C10  .  .  .  120.3(9)  ?
  C12  C11  C10  .  .  .  119.4(9)  ?
  H4  C4  N1  .  .  .  118.8(8)  ?
  H4  C4  C5  .  .  .  117.3(8)  ?
  N1  C4  C5  .  .  .  123.9(8)  ?
  H12  C12  C11  .  .  .  120.5(9)  ?
  H12  C12  C13  .  .  .  119.3(9)  ?
  C11  C12  C13  .  .  .  120.2(8)  ?
  O1  C1  Re1  .  .  .  178.8(9)  ?
  H6  C6  C5  .  .  .  121.5(9)  ?
  H6  C6  C7  .  .  .  118.8(9)  ?
  C5  C6  C7  .  .  .  119.7(9)  ?
  O5a  S  O7a  .  .  .  127.6(15)  ?
  O5a  S  O5b  .  .  .  47.5(14)  ?
  O5a  S  O6b  .  .  .  150.3(14)  ?
  O5a  S  O6a  .  .  .  115.2(16)  ?
  O5a  S  O7b  .  .  .  69.2(14)  ?
  O5a  S  C14  .  .  .  107.0(14)  ?
  O7a  S  O5b  .  .  .  136.1(10)  ?
  O7a  S  O6b  .  .  .  41.1(12)  ?
  O7a  S  O6a  .  .  .  101.5(13)  ?
  O7a  S  O7b  .  .  .  69.8(11)  ?
  O7a  S  C14  .  .  .  108.8(9)  ?
  O5b  S  O6b  .  .  .  116.3(11)  ?
  O5b  S  O6a  .  .  .  68.1(12)  ?
  O5b  S  O7b  .  .  .  114.7(10)  ?
  O5b  S  C14  .  .  .  113.6(8)  ?
  O6b  S  O6a  .  .  .  60.8(13)  ?
  O6b  S  O7b  .  .  .  110.8(12)  ?
  O6b  S  C14  .  .  .  102.5(10)  ?
  O6a  S  O7b  .  .  .  170.2(12)  ?
  O6a  S  C14  .  .  .  90.4(11)  ?
  O7b  S  C14  .  .  .  96.6(9)  ?
  F2a  C14  F1b  .  .  .  38(2)  ?
  F2a  C14  F2b  .  .  .  140(3)  ?
  F2a  C14  F1a  .  .  .  121(2)  ?
  F2a  C14  F3a  .  .  .  120.4(18)  ?
  F2a  C14  F3b  .  .  .  73.9(19)  ?
  F2a  C14  S  .  .  .  109.6(17)  ?
  F1b  C14  F2b  .  .  .  127(3)  ?
  F1b  C14  F1a  .  .  .  147(3)  ?
  F1b  C14  F3a  .  .  .  83.5(19)  ?
  F1b  C14  F3b  .  .  .  111(2)  ?
  F1b  C14  S  .  .  .  106.7(18)  ?
  F2b  C14  F1a  .  .  .  45.9(15)  ?
  F2b  C14  F3a  .  .  .  58.4(16)  ?
  F2b  C14  F3b  .  .  .  109.6(18)  ?
  F2b  C14  S  .  .  .  110.3(18)  ?
  F1a  C14  F3a  .  .  .  104.0(17)  ?
  F1a  C14  F3b  .  .  .  63.7(15)  ?
  F1a  C14  S  .  .  .  105.0(15)  ?
  F3a  C14  F3b  .  .  .  165.5(17)  ?
  F3a  C14  S  .  .  .  92.4(13)  ?
  F3b  C14  S  .  .  .  84.2(14)  ?
  O5b  O5a  S  .  .  .  73.4(18)  ?
  O5b  O5a  O7b  .  .  .  133(2)  ?
  S  O5a  O7b  .  .  .  62.2(13)  ?
  O6b  O6a  S  .  .  .  58.1(12)  ?
  O6b  O6a  O5b  .  .  .  102.5(18)  ?
  S  O6a  O5b  .  .  .  53.8(10)  ?
  O6b  O7a  S  .  .  .  73.7(16)  ?
  O6b  O7a  O7b  .  .  .  132(2)  ?
  S  O7a  O7b  .  .  .  58.9(10)  ?
  O5a  O5b  S  .  .  .  59.1(16)  ?
  O5a  O5b  O6a  .  .  .  117(2)  ?
  S  O5b  O6a  .  .  .  58.0(11)  ?
  O7a  O6b  S  .  .  .  65.3(15)  ?
  O7a  O6b  O6a  .  .  .  126(2)  ?
  S  O6b  O6a  .  .  .  61.2(13)  ?
  S  O7b  O5a  .  .  .  48.6(11)  ?
  S  O7b  O7a  .  .  .  51.4(9)  ?
  O5a  O7b  O7a  .  .  .  94.4(15)  ?
  F2b  F1a  C14  .  .  .  63(2)  ?
  F2b  F1a  F3b  .  .  .  132(2)  ?
  C14  F1a  F3b  .  .  .  69.3(16)  ?
  F1b  F2a  C14  .  .  .  72(3)  ?
  F2b  F3a  C14  .  .  .  46.4(12)  ?
  F2a  F1b  C14  .  .  .  70(3)  ?
  F1a  F2b  C14  .  .  .  71(2)  ?
  F1a  F2b  F3a  .  .  .  145(2)  ?
  C14  F2b  F3a  .  .  .  75.2(17)  ?
  F1a  F3b  C14  .  .  .  47.0(13)  ?
 
loop_
_geom_torsion_atom_site_label_1
_geom_torsion_atom_site_label_2
_geom_torsion_atom_site_label_3
_geom_torsion_atom_site_label_4
_geom_torsion_site_symmetry_1
_geom_torsion_site_symmetry_2
_geom_torsion_site_symmetry_3
_geom_torsion_site_symmetry_4
_geom_torsion
_geom_torsion_publ_flag              #<< enter yes for value to be published
  N2  Re1  O4  H4a  .  .  .  .  65.5(4)  ?
  N2  Re1  O4  H4b  .  .  .  .  -176.5(4)  ?
  N1  Re1  O4  H4a  .  .  .  .  141.6(4)  ?
  N1  Re1  O4  H4b  .  .  .  .  -100.4(4)  ?
  C2  Re1  O4  H4a  .  .  .  .  -33.7(5)  ?
  C2  Re1  O4  H4b  .  .  .  .  84.3(5)  ?
  C3  Re1  O4  H4a  .  .  .  .  -121.6(5)  ?
  C3  Re1  O4  H4b  .  .  .  .  -3.6(5)  ?
  C1  Re1  O4  H4a  .  .  .  .  93(4)  ?
  C1  Re1  O4  H4b  .  .  .  .  -149(3)  ?
  O4  Re1  N2  C9  .  .  .  .  80.5(5)  ?
  O4  Re1  N2  C13  .  .  .  .  -97.4(6)  ?
  N1  Re1  N2  C9  .  .  .  .  -2.0(5)  ?
  N1  Re1  N2  C13  .  .  .  .  -179.9(6)  ?
  C2  Re1  N2  C9  .  .  .  .  173.1(6)  ?
  C2  Re1  N2  C13  .  .  .  .  -4.8(7)  ?
  C3  Re1  N2  C9  .  .  .  .  -1(3)  ?
  C3  Re1  N2  C13  .  .  .  .  -179(2)  ?
  C1  Re1  N2  C9  .  .  .  .  -97.1(6)  ?
  C1  Re1  N2  C13  .  .  .  .  85.0(7)  ?
  O4  Re1  N1  C8  .  .  .  .  -82.5(5)  ?
  O4  Re1  N1  C4  .  .  .  .  96.1(6)  ?
  N2  Re1  N1  C8  .  .  .  .  .7(5)  ?
  N2  Re1  N1  C4  .  .  .  .  179.3(7)  ?
  C2  Re1  N1  C8  .  .  .  .  -42(3)  ?
  C2  Re1  N1  C4  .  .  .  .  137(3)  ?
  C3  Re1  N1  C8  .  .  .  .  -179.2(6)  ?
  C3  Re1  N1  C4  .  .  .  .  -.6(7)  ?
  C1  Re1  N1  C8  .  .  .  .  93.4(6)  ?
  C1  Re1  N1  C4  .  .  .  .  -88.0(7)  ?
  O4  Re1  C2  O2  .  .  .  .  -57(18)  ?
  N2  Re1  C2  O2  .  .  .  .  -139(18)  ?
  N1  Re1  C2  O2  .  .  .  .  -98(18)  ?
  C3  Re1  C2  O2  .  .  .  .  40(18)  ?
  C1  Re1  C2  O2  .  .  .  .  127(18)  ?
  O4  Re1  C3  O3  .  .  .  .  177(9)  ?
  N2  Re1  C3  O3  .  .  .  .  -103(9)  ?
  N1  Re1  C3  O3  .  .  .  .  -102(9)  ?
  C2  Re1  C3  O3  .  .  .  .  83(9)  ?
  C1  Re1  C3  O3  .  .  .  .  -6(9)  ?
  O4  Re1  C1  O1  .  .  .  .  -103(41)  ?
  N2  Re1  C1  O1  .  .  .  .  -76(42)  ?
  N1  Re1  C1  O1  .  .  .  .  -151(42)  ?
  C2  Re1  C1  O1  .  .  .  .  24(42)  ?
  C3  Re1  C1  O1  .  .  .  .  111(42)  ?
  Re1  N2  C9  C8  .  .  .  .  3.0(8)  ?
  Re1  N2  C9  C10  .  .  .  .  -177.7(6)  ?
  C13  N2  C9  C8  .  .  .  .  -179.0(7)  ?
  C13  N2  C9  C10  .  .  .  .  .4(11)  ?
  Re1  N2  C13  C12  .  .  .  .  178.1(6)  ?
  Re1  N2  C13  H13  .  .  .  .  -2.7(11)  ?
  C9  N2  C13  C12  .  .  .  .  .2(12)  ?
  C9  N2  C13  H13  .  .  .  .  179.4(7)  ?
  Re1  N1  C8  C9  .  .  .  .  .6(9)  ?
  Re1  N1  C8  C7  .  .  .  .  -179.7(6)  ?
  C4  N1  C8  C9  .  .  .  .  -178.1(7)  ?
  C4  N1  C8  C7  .  .  .  .  1.5(11)  ?
  Re1  N1  C4  C5  .  .  .  .  -179.7(7)  ?
  Re1  N1  C4  H4  .  .  .  .  .8(11)  ?
  C8  N1  C4  C5  .  .  .  .  -1.1(12)  ?
  C8  N1  C4  H4  .  .  .  .  179.4(7)  ?
  N2  C9  C8  N1  .  .  .  .  -2.4(10)  ?
  N2  C9  C8  C7  .  .  .  .  178.0(7)  ?
  C10  C9  C8  N1  .  .  .  .  178.3(7)  ?
  C10  C9  C8  C7  .  .  .  .  -1.3(13)  ?
  N2  C9  C10  C11  .  .  .  .  -.8(12)  ?
  N2  C9  C10  H10  .  .  .  .  -178.5(7)  ?
  C8  C9  C10  C11  .  .  .  .  178.5(8)  ?
  C8  C9  C10  H10  .  .  .  .  .8(12)  ?
  N1  C8  C7  C6  .  .  .  .  -.2(13)  ?
  N1  C8  C7  H7  .  .  .  .  178.7(7)  ?
  C9  C8  C7  C6  .  .  .  .  179.4(8)  ?
  C9  C8  C7  H7  .  .  .  .  -1.7(13)  ?
  C9  C10  C11  C12  .  .  .  .  .6(13)  ?
  C9  C10  C11  H11  .  .  .  .  179.5(8)  ?
  H10  C10  C11  C12  .  .  .  .  178.2(8)  ?
  H10  C10  C11  H11  .  .  .  .  -2.9(14)  ?
  C8  C7  C6  C5  .  .  .  .  -1.7(14)  ?
  C8  C7  C6  H6  .  .  .  .  178.6(8)  ?
  H7  C7  C6  C5  .  .  .  .  179.4(8)  ?
  H7  C7  C6  H6  .  .  .  .  -.4(14)  ?
  N2  C13  C12  C11  .  .  .  .  -.5(13)  ?
  N2  C13  C12  H12  .  .  .  .  176.9(8)  ?
  H13  C13  C12  C11  .  .  .  .  -179.6(8)  ?
  H13  C13  C12  H12  .  .  .  .  -2.3(13)  ?
  C6  C5  C4  N1  .  .  .  .  -.8(14)  ?
  C6  C5  C4  H4  .  .  .  .  178.7(8)  ?
  H5  C5  C4  N1  .  .  .  .  176.0(8)  ?
  H5  C5  C4  H4  .  .  .  .  -4.5(14)  ?
  C4  C5  C6  C7  .  .  .  .  2.1(14)  ?
  C4  C5  C6  H6  .  .  .  .  -178.1(9)  ?
  H5  C5  C6  C7  .  .  .  .  -174.8(8)  ?
  H5  C5  C6  H6  .  .  .  .  4.9(15)  ?
  C10  C11  C12  C13  .  .  .  .  .0(14)  ?
  C10  C11  C12  H12  .  .  .  .  -177.3(8)  ?
  H11  C11  C12  C13  .  .  .  .  -178.9(8)  ?
  H11  C11  C12  H12  .  .  .  .  3.8(15)  ?
  O5a  S  C14  F1a  .  .  .  .  74(2)  ?
  O5a  S  C14  F2a  .  .  .  .  -154(2)  ?
  O5a  S  C14  F3a  .  .  .  .  -30.9(16)  ?
  O5a  S  C14  F1b  .  .  .  .  -115(2)  ?
  O5a  S  C14  F2b  .  .  .  .  26(2)  ?
  O5a  S  C14  F3b  .  .  .  .  135.0(17)  ?
  O6a  S  C14  F1a  .  .  .  .  -42.4(18)  ?
  O6a  S  C14  F2a  .  .  .  .  89(2)  ?
  O6a  S  C14  F3a  .  .  .  .  -147.5(13)  ?
  O6a  S  C14  F1b  .  .  .  .  129(2)  ?
  O6a  S  C14  F2b  .  .  .  .  -90(2)  ?
  O6a  S  C14  F3b  .  .  .  .  18.4(15)  ?
  O7a  S  C14  F1a  .  .  .  .  -144.7(16)  ?
  O7a  S  C14  F2a  .  .  .  .  -13(2)  ?
  O7a  S  C14  F3a  .  .  .  .  110.1(12)  ?
  O7a  S  C14  F1b  .  .  .  .  26(2)  ?
  O7a  S  C14  F2b  .  .  .  .  167.2(17)  ?
  O7a  S  C14  F3b  .  .  .  .  -84.0(14)  ?
  O5b  S  C14  F1a  .  .  .  .  23.8(19)  ?
  O5b  S  C14  F2a  .  .  .  .  155.1(17)  ?
  O5b  S  C14  F3a  .  .  .  .  -81.3(12)  ?
  O5b  S  C14  F1b  .  .  .  .  -165(2)  ?
  O5b  S  C14  F2b  .  .  .  .  -24(2)  ?
  O5b  S  C14  F3b  .  .  .  .  84.6(14)  ?
  O6b  S  C14  F1a  .  .  .  .  -102.5(17)  ?
  O6b  S  C14  F2a  .  .  .  .  29(2)  ?
  O6b  S  C14  F3a  .  .  .  .  152.4(12)  ?
  O6b  S  C14  F1b  .  .  .  .  68(2)  ?
  O6b  S  C14  F2b  .  .  .  .  -150.5(18)  ?
  O6b  S  C14  F3b  .  .  .  .  -41.7(15)  ?
  O7b  S  C14  F1a  .  .  .  .  144.4(16)  ?
  O7b  S  C14  F2a  .  .  .  .  -84.3(19)  ?
  O7b  S  C14  F3a  .  .  .  .  39.3(12)  ?
  O7b  S  C14  F1b  .  .  .  .  -45(2)  ?
  O7b  S  C14  F2b  .  .  .  .  96.4(18)  ?
  O7b  S  C14  F3b  .  .  .  .  -154.8(13)  ?
  C14  S  O5a  O5b  .  .  .  .  -106.8(15)  ?
  C14  S  O5a  O7b  .  .  .  .  90.7(11)  ?
  O6a  S  O5a  O5b  .  .  .  .  -8(2)  ?
  O6a  S  O5a  O7b  .  .  .  .  -170.5(14)  ?
  O7a  S  O5a  O5b  .  .  .  .  121.9(17)  ?
  O7a  S  O5a  O7b  .  .  .  .  -40.6(18)  ?
  O5b  S  O5a  O5b  .  .  .  .  .0(13)  ?
  O5b  S  O5a  O7b  .  .  .  .  -163(2)  ?
  O6b  S  O5a  O5b  .  .  .  .  67(4)  ?
  O6b  S  O5a  O7b  .  .  .  .  -96(3)  ?
  O7b  S  O5a  O5b  .  .  .  .  163(2)  ?
  O7b  S  O5a  O7b  .  .  .  .  -.0(11)  ?
  C14  S  O6a  O5b  .  .  .  .  115.4(10)  ?
  C14  S  O6a  O6b  .  .  .  .  -104.2(12)  ?
  O5a  S  O6a  O5b  .  .  .  .  6.3(17)  ?
  O5a  S  O6a  O6b  .  .  .  .  146.8(17)  ?
  O7a  S  O6a  O5b  .  .  .  .  -135.3(11)  ?
  O7a  S  O6a  O6b  .  .  .  .  5.1(14)  ?
  O5b  S  O6a  O5b  .  .  .  .  -.0(10)  ?
  O5b  S  O6a  O6b  .  .  .  .  140.4(14)  ?
  O6b  S  O6a  O5b  .  .  .  .  -140.4(14)  ?
  O6b  S  O6a  O6b  .  .  .  .  .0(12)  ?
  O7b  S  O6a  O5b  .  .  .  .  -108(7)  ?
  O7b  S  O6a  O6b  .  .  .  .  32(8)  ?
  C14  S  O7a  O6b  .  .  .  .  87.6(16)  ?
  C14  S  O7a  O7b  .  .  .  .  -90.3(11)  ?
  O5a  S  O7a  O6b  .  .  .  .  -142(2)  ?
  O5a  S  O7a  O7b  .  .  .  .  40.4(19)  ?
  O6a  S  O7a  O6b  .  .  .  .  -6.8(18)  ?
  O6a  S  O7a  O7b  .  .  .  .  175.3(13)  ?
  O5b  S  O7a  O6b  .  .  .  .  -77(2)  ?
  O5b  S  O7a  O7b  .  .  .  .  105.0(15)  ?
  O6b  S  O7a  O6b  .  .  .  .  -.0(16)  ?
  O6b  S  O7a  O7b  .  .  .  .  -177.9(18)  ?
  O7b  S  O7a  O6b  .  .  .  .  177.9(18)  ?
  O7b  S  O7a  O7b  .  .  .  .  .0(11)  ?
  C14  S  O5b  O5a  .  .  .  .  92(2)  ?
  C14  S  O5b  O6a  .  .  .  .  -80.4(13)  ?
  O5a  S  O5b  O5a  .  .  .  .  0(2)  ?
  O5a  S  O5b  O6a  .  .  .  .  -172(2)  ?
  O6a  S  O5b  O5a  .  .  .  .  172(2)  ?
  O6a  S  O5b  O6a  .  .  .  .  .0(15)  ?
  O7a  S  O5b  O5a  .  .  .  .  -104(2)  ?
  O7a  S  O5b  O6a  .  .  .  .  83.9(18)  ?
  O6b  S  O5b  O5a  .  .  .  .  -149(2)  ?
  O6b  S  O5b  O6a  .  .  .  .  38.3(15)  ?
  O7b  S  O5b  O5a  .  .  .  .  -18(2)  ?
  O7b  S  O5b  O6a  .  .  .  .  169.8(13)  ?
  C14  S  O6b  O6a  .  .  .  .  83.4(13)  ?
  C14  S  O6b  O7a  .  .  .  .  -104.3(15)  ?
  O5a  S  O6b  O6a  .  .  .  .  -90(3)  ?
  O5a  S  O6b  O7a  .  .  .  .  82(3)  ?
  O6a  S  O6b  O6a  .  .  .  .  -.0(16)  ?
  O6a  S  O6b  O7a  .  .  .  .  172(2)  ?
  O7a  S  O6b  O6a  .  .  .  .  -172(2)  ?
  O7a  S  O6b  O7a  .  .  .  .  .0(16)  ?
  O5b  S  O6b  O6a  .  .  .  .  -41.2(16)  ?
  O5b  S  O6b  O7a  .  .  .  .  131.1(15)  ?
  O7b  S  O6b  O6a  .  .  .  .  -174.5(14)  ?
  O7b  S  O6b  O7a  .  .  .  .  -2.2(18)  ?
  C14  S  O7b  O5a  .  .  .  .  -105.7(15)  ?
  C14  S  O7b  O7a  .  .  .  .  107.6(10)  ?
  O5a  S  O7b  O5a  .  .  .  .  .0(18)  ?
  O5a  S  O7b  O7a  .  .  .  .  -146.7(16)  ?
  O6a  S  O7b  O5a  .  .  .  .  118(7)  ?
  O6a  S  O7b  O7a  .  .  .  .  -28(7)  ?
  O7a  S  O7b  O5a  .  .  .  .  146.7(16)  ?
  O7a  S  O7b  O7a  .  .  .  .  -.0(11)  ?
  O5b  S  O7b  O5a  .  .  .  .  14.1(16)  ?
  O5b  S  O7b  O7a  .  .  .  .  -132.5(11)  ?
  O6b  S  O7b  O5a  .  .  .  .  148.2(16)  ?
  O6b  S  O7b  O7a  .  .  .  .  1.5(13)  ?
  S  C14  F1a  F2b  .  .  .  .  -103.9(19)  ?
  S  C14  F1a  F3b  .  .  .  .  75.6(15)  ?
  F2a  C14  F1a  F2b  .  .  .  .  132(3)  ?
  F2a  C14  F1a  F3b  .  .  .  .  -49(2)  ?
  F3a  C14  F1a  F2b  .  .  .  .  -7.6(17)  ?
  F3a  C14  F1a  F3b  .  .  .  .  172(2)  ?
  F1b  C14  F1a  F2b  .  .  .  .  92(5)  ?
  F1b  C14  F1a  F3b  .  .  .  .  -88(5)  ?
  F2b  C14  F1a  F2b  .  .  .  .  -.0(18)  ?
  F2b  C14  F1a  F3b  .  .  .  .  179(2)  ?
  F3b  C14  F1a  F2b  .  .  .  .  -179(2)  ?
  F3b  C14  F1a  F3b  .  .  .  .  .0(15)  ?
  S  C14  F2a  F1b  .  .  .  .  92(3)  ?
  F1a  C14  F2a  F1b  .  .  .  .  -146(3)  ?
  F3a  C14  F2a  F1b  .  .  .  .  -13(3)  ?
  F1b  C14  F2a  F1b  .  .  .  .  0(3)  ?
  F2b  C14  F2a  F1b  .  .  .  .  -89(4)  ?
  F3b  C14  F2a  F1b  .  .  .  .  170(3)  ?
  S  C14  F3a  F2b  .  .  .  .  112.4(16)  ?
  F1a  C14  F3a  F2b  .  .  .  .  6.4(15)  ?
  F2a  C14  F3a  F2b  .  .  .  .  -133(3)  ?
  F1b  C14  F3a  F2b  .  .  .  .  -141(3)  ?
  F2b  C14  F3a  F2b  .  .  .  .  .0(15)  ?
  F3b  C14  F3a  F2b  .  .  .  .  37(7)  ?
  S  C14  F1b  F2a  .  .  .  .  -101(3)  ?
  F1a  C14  F1b  F2a  .  .  .  .  63(5)  ?
  F2a  C14  F1b  F2a  .  .  .  .  0(2)  ?
  F3a  C14  F1b  F2a  .  .  .  .  169(3)  ?
  F2b  C14  F1b  F2a  .  .  .  .  127(4)  ?
  F3b  C14  F1b  F2a  .  .  .  .  -11(3)  ?
  S  C14  F2b  F1a  .  .  .  .  91.5(17)  ?
  S  C14  F2b  F3a  .  .  .  .  -79.9(14)  ?
  F1a  C14  F2b  F1a  .  .  .  .  .0(14)  ?
  F1a  C14  F2b  F3a  .  .  .  .  -171(2)  ?
  F2a  C14  F2b  F1a  .  .  .  .  -88(4)  ?
  F2a  C14  F2b  F3a  .  .  .  .  101(3)  ?
  F3a  C14  F2b  F1a  .  .  .  .  171(2)  ?
  F3a  C14  F2b  F3a  .  .  .  .  -.0(10)  ?
  F1b  C14  F2b  F1a  .  .  .  .  -137(3)  ?
  F1b  C14  F2b  F3a  .  .  .  .  51(3)  ?
  F3b  C14  F2b  F1a  .  .  .  .  0(2)  ?
  F3b  C14  F2b  F3a  .  .  .  .  -171(2)  ?
  S  C14  F3b  F1a  .  .  .  .  -109.9(14)  ?
  F1a  C14  F3b  F1a  .  .  .  .  -.0(11)  ?
  F2a  C14  F3b  F1a  .  .  .  .  138(2)  ?
  F3a  C14  F3b  F1a  .  .  .  .  -33(8)  ?
  F1b  C14  F3b  F1a  .  .  .  .  144(3)  ?
  F2b  C14  F3b  F1a  .  .  .  .  -.4(17)  ?
  S  O5a  O5b  S  .  .  .  .  .0(2)  ?
  S  O5a  O5b  O6a  .  .  .  .  7(2)  ?
  O7b  O5a  O5b  S  .  .  .  .  21(2)  ?
  O7b  O5a  O5b  O6a  .  .  .  .  29(4)  ?
  S  O5a  O7b  S  .  .  .  .  -.0(2)  ?
  S  O5a  O7b  O7a  .  .  .  .  25.5(12)  ?
  O5b  O5a  O7b  S  .  .  .  .  -23(3)  ?
  O5b  O5a  O7b  O7a  .  .  .  .  3(3)  ?
  S  O6a  O5b  S  .  .  .  .  -.0(2)  ?
  S  O6a  O5b  O5a  .  .  .  .  -7(2)  ?
  O6b  O6a  O5b  S  .  .  .  .  -33.6(12)  ?
  O6b  O6a  O5b  O5a  .  .  .  .  -41(3)  ?
  S  O6a  O6b  S  .  .  .  .  .0(2)  ?
  S  O6a  O6b  O7a  .  .  .  .  -9(2)  ?
  O5b  O6a  O6b  S  .  .  .  .  31.8(11)  ?
  O5b  O6a  O6b  O7a  .  .  .  .  23(3)  ?
  S  O7a  O6b  S  .  .  .  .  -.00(19)  ?
  S  O7a  O6b  O6a  .  .  .  .  8(2)  ?
  O7b  O7a  O6b  S  .  .  .  .  2(2)  ?
  O7b  O7a  O6b  O6a  .  .  .  .  11(4)  ?
  S  O7a  O7b  S  .  .  .  .  .0(2)  ?
  S  O7a  O7b  O5a  .  .  .  .  -24.4(12)  ?
  O6b  O7a  O7b  S  .  .  .  .  -3(2)  ?
  O6b  O7a  O7b  O5a  .  .  .  .  -27(3)  ?
  C14  F1a  F2b  C14  .  .  .  .  -.0(17)  ?
  C14  F1a  F2b  F3a  .  .  .  .  15(3)  ?
  F3b  F1a  F2b  C14  .  .  .  .  0(3)  ?
  F3b  F1a  F2b  F3a  .  .  .  .  14(5)  ?
  C14  F1a  F3b  C14  .  .  .  .  .0(17)  ?
  F2b  F1a  F3b  C14  .  .  .  .  0(3)  ?
  C14  F2a  F1b  C14  .  .  .  .  .0(16)  ?
  C14  F3a  F2b  C14  .  .  .  .  .0(17)  ?
  C14  F3a  F2b  F1a  .  .  .  .  -14(3)  ?
 
loop_
_geom_hbond_atom_site_label_D
_geom_hbond_atom_site_label_H
_geom_hbond_atom_site_label_A
_geom_hbond_site_symmetry_D
_geom_hbond_site_symmetry_H
_geom_hbond_site_symmetry_A
_geom_hbond_distance_DH
_geom_hbond_distance_HA
_geom_hbond_distance_DA
_geom_hbond_angle_DHA
_geom_hbond_publ_flag               #<< enter yes for value to be published
      ?  ?  ?  ?  ?  ?  ?  ?  ?  ?  ?
 
 
#--------------------------------------------------------------------------
#      Special items requested by author for inclusion in paper
#--------------------------------------------------------------------------
 
loop_
_publ_manuscript_incl_extra_item
_publ_manuscript_incl_extra_defn
                       ?  ?
 
#--------------------------------------------------------------------------
#       Items which are non-mandatory for Acta C submissions
#--------------------------------------------------------------------------
 
loop_
_geom_contact_atom_site_label_1
_geom_contact_atom_site_label_2
_geom_contact_distance
_geom_contact_site_symmetry_1
_geom_contact_site_symmetry_2
_geom_contact_publ_flag
  H4a  H4b  1.64947(15)  .  .  ?
  O5a  H4a  1.66(3)  .  .  ?
  F2a  F3b  1.66(4)  .  .  ?
  F3a  F1b  1.82(3)  .  .  ?
  O7b  H4b  1.84(2)  .  '3 666'  ?
  O6a  F3b  1.85(4)  .  .  ?
  O7a  H4b  1.851(19)  .  '3 666'  ?
  O7b  H4a  1.977(19)  .  .  ?
  H10  H7  2.01927(16)  .  .  ?
  F1a  F2a  2.06(3)  .  .  ?
  F1b  F2b  2.06(3)  .  .  ?
  C6  H5  2.072(10)  .  .  ?
  C5  H4  2.096(10)  .  .  ?
  C12  H11  2.097(10)  .  .  ?
  N2  H13  2.102(6)  .  .  ?
  N1  H4  2.109(6)  .  .  ?
  C10  H11  2.114(9)  .  .  ?
  C11  H12  2.117(10)  .  .  ?
  C13  H12  2.123(9)  .  .  ?
  C5  H6  2.124(10)  .  .  ?
  C7  H6  2.126(9)  .  .  ?
  C12  H13  2.128(10)  .  .  ?
  C4  H5  2.131(9)  .  .  ?
  C9  H10  2.147(8)  .  .  ?
  C8  H7  2.150(8)  .  .  ?
  C6  H7  2.150(10)  .  .  ?
  F2a  F2b  2.16(3)  .  .  ?
  C11  H10  2.160(10)  .  .  ?
  F1a  F3a  2.19(2)  .  .  ?
  O6a  O7a  2.23(3)  .  .  ?
  F2b  F3b  2.24(4)  .  .  ?
  F1b  F3b  2.25(4)  .  .  ?
  F1a  F1b  2.28(3)  .  .  ?
  C8  C4  2.302(12)  .  .  ?
  C4  C6  2.331(13)  .  .  ?
  F2a  F3a  2.34(3)  .  .  ?
  O6b  F3b  2.34(3)  .  .  ?
  O5a  O6a  2.35(4)  .  .  ?
  O6b  H7  2.35(2)  .  '1 545'  ?
  C9  C13  2.348(11)  .  .  ?
  O6b  H10  2.35(2)  .  '1 545'  ?
  S  F3b  2.36(3)  .  .  ?
  C10  C12  2.361(13)  .  .  ?
  N1  C9  2.362(10)  .  .  ?
  F3b  H5  2.37(3)  .  '4 564'  ?
  C13  C11  2.372(13)  .  .  ?
  C7  C5  2.375(13)  .  .  ?
  N2  C12  2.377(11)  .  .  ?
  O5a  O7a  2.38(3)  .  .  ?
  N1  C7  2.380(10)  .  .  ?
  C8  C6  2.387(13)  .  .  ?
  N1  C5  2.392(12)  .  .  ?
  O7b  F3a  2.39(3)  .  .  ?
  N2  C10  2.395(10)  .  .  ?
  N2  C8  2.397(10)  .  .  ?
  C9  C11  2.406(12)  .  .  ?
  H6  H5  2.4118(2)  .  .  ?
  H13  H12  2.4333(2)  .  .  ?
  O6b  O7b  2.44(3)  .  .  ?
  H12  H11  2.4362(2)  .  .  ?
  O6a  H10  2.44(3)  .  '1 545'  ?
  H5  H4  2.4445(2)  .  .  ?
  O5b  O6b  2.44(3)  .  .  ?
  C14  O6a  2.45(3)  .  .  ?
  H7  H6  2.4543(2)  .  .  ?
  O5b  O7b  2.47(3)  .  .  ?
  O7a  H7  2.469(18)  .  '1 545'  ?
  O6a  F1a  2.47(3)  .  .  ?
  H11  H10  2.4816(2)  .  .  ?
  O2  H12  2.486(7)  .  '3 766'  ?
  C9  C7  2.493(12)  .  .  ?
  O5a  F3a  2.50(3)  .  .  ?
  S  F1b  2.51(3)  .  .  ?
  S  F3a  2.517(18)  .  .  ?
  C8  C10  2.525(12)  .  .  ?
  S  F1a  2.537(16)  .  .  ?
  S  F2a  2.548(19)  .  .  ?
  O5b  H4a  2.562(16)  .  .  ?
  S  F2b  2.57(2)  .  .  ?
  C14  O7b  2.58(3)  .  .  ?
  O5b  H13  2.579(16)  .  '3 766'  ?
  C3  C1  2.594(13)  .  .  ?
  O7a  O5b  2.60(2)  .  .  ?
  O3  H11  2.598(8)  .  '4 465'  ?
  C14  O5a  2.60(4)  .  .  ?
  N2  N1  2.632(9)  .  .  ?
  C2  C3  2.635(13)  .  .  ?
  O5a  O6b  2.64(3)  .  .  ?
  O7b  F1b  2.65(3)  .  .  ?
  C14  O6b  2.65(3)  .  .  ?
  C2  C1  2.663(13)  .  .  ?
  C7  H10  2.677(9)  .  .  ?
  O7b  H6  2.679(19)  .  '3 676'  ?
  O2  H4  2.684(7)  .  '2 646'  ?
  C7  C4  2.691(12)  .  .  ?
  O3  H12  2.697(7)  .  '4 465'  ?
  C10  H7  2.702(9)  .  .  ?
  C14  O7a  2.70(3)  .  .  ?
  S  H4a  2.705(3)  .  .  ?
  F2a  H11  2.71(2)  .  '2 645'  ?
  O4  H6  2.708(5)  .  '3 676'  ?
  O6b  F2a  2.72(3)  .  .  ?
  Re1  H4a  2.7196(4)  .  .  ?
  Re1  H4b  2.7196(4)  .  .  ?
  C3  H4  2.724(8)  .  .  ?
  C10  C13  2.726(12)  .  .  ?
  F1a  H4  2.729(16)  .  '4 564'  ?
  C8  C5  2.729(12)  .  .  ?
  F1a  H5  2.733(16)  .  '4 564'  ?
  O6a  H13  2.73(3)  .  '3 766'  ?
  C9  C12  2.743(12)  .  .  ?
  C9  H7  2.745(8)  .  .  ?
  C8  H10  2.751(8)  .  .  ?
  O5a  F2b  2.75(3)  .  .  ?
  H4a  H6  2.7574(2)  .  '3 676'  ?
  N1  C6  2.759(11)  .  .  ?
  F1b  H11  2.76(3)  .  '2 645'  ?
  O7a  F1b  2.76(3)  .  .  ?
  N2  C11  2.763(11)  .  .  ?
  O7a  F2a  2.78(3)  .  .  ?
  C2  H13  2.791(9)  .  .  ?
  O4  N1  2.811(8)  .  .  ?
  F3a  H5  2.818(18)  .  '3 676'  ?
  O6b  H4b  2.82(2)  .  '3 666'  ?
  C14  O5b  2.82(3)  .  .  ?
  S  H4b  2.822(3)  .  '3 666'  ?
  O4  N2  2.830(8)  .  .  ?
  F3a  H6  2.858(17)  .  '3 676'  ?
  O5b  F1a  2.86(2)  .  .  ?
  O5b  H13  2.900(16)  .  .  ?
  O1  H5  2.922(7)  .  '2 646'  ?
  O7a  F3b  2.93(3)  .  .  ?
  N2  H4a  2.944(6)  .  .  ?
  O6b  F1b  2.95(3)  .  .  ?
  C3  H4b  2.950(9)  .  .  ?
  C2  H4a  2.950(9)  .  .  ?
  O5b  F2b  2.95(2)  .  .  ?
  O6a  F2a  2.95(3)  .  .  ?
  N2  C1  2.970(12)  .  .  ?
  O6a  F2b  2.99(3)  .  .  ?
  O5a  F1a  2.99(3)  .  .  ?
  O6a  O7b  2.99(3)  .  .  ?
  C10  C7  2.997(13)  .  .  ?
  O6a  H7  3.00(3)  .  '1 545'  ?
  F2a  H5  3.01(2)  .  '4 564'  ?
  O1  H11  3.008(8)  .  '3 776'  ?
  O4  C2  3.009(11)  .  .  ?
  N1  C1  3.010(12)  .  .  ?
  Re1  C9  3.025(8)  .  .  ?
  Re1  C8  3.026(8)  .  .  ?
  O5a  H13  3.03(3)  .  .  ?
  Re1  O1  3.029(8)  .  .  ?
  O5b  F3b  3.04(3)  .  .  ?
  S  H7  3.039(3)  .  '1 545'  ?
  O3  H4  3.039(7)  .  .  ?
  O7b  F2a  3.04(3)  .  .  ?
  Re1  O3  3.047(7)  .  .  ?
  Re1  O2  3.053(7)  .  .  ?
  O3  O1  3.053(10)  .  '2 646'  ?
  F2b  H4  3.06(2)  .  '4 564'  ?
  N1  C3  3.069(10)  .  .  ?
  O7b  H4a  3.08(2)  .  '3 666'  ?
  F3a  F3b  3.08(3)  .  .  ?
  O7b  H4b  3.09(2)  .  .  ?
  O4  C3  3.089(11)  .  .  ?
  N2  C2  3.123(11)  .  .  ?
  Re1  C13  3.132(9)  .  .  ?
  H4b  H6  3.1348(3)  .  '3 676'  ?
  Re1  C4  3.138(9)  .  .  ?
  O7a  H10  3.14(2)  .  '1 545'  ?
  O2  H13  3.156(7)  .  .  ?
  O7b  F2b  3.17(3)  .  .  ?
  O5b  F3a  3.17(2)  .  .  ?
  O1  C5  3.189(12)  .  '2 646'  ?
  O5b  H7  3.212(16)  .  '1 545'  ?
  Re1  H13  3.2175(4)  .  .  ?
  Re1  H4  3.2217(4)  .  .  ?
  H4a  H4b  3.2370(2)  .  '3 666'  ?
  O5a  H4b  3.24(3)  .  .  ?
  O5a  H4b  3.25(3)  .  '3 666'  ?
  O1  H6  3.255(8)  .  '2 646'  ?
  C2  H4  3.264(9)  .  '2 646'  ?
  C14  H5  3.26(2)  .  '4 564'  ?
  O6a  F1b  3.27(4)  .  .  ?
  O6b  F1a  3.27(3)  .  .  ?
  O5b  H12  3.271(16)  .  '3 766'  ?
  F3a  F3b  3.28(3)  .  '2 655'  ?
  F2b  H12  3.28(2)  .  .  ?
  O5a  F1b  3.28(4)  .  .  ?
  O7a  H4a  3.287(18)  .  .  ?
  C3  C4  3.292(12)  .  .  ?
  H13  H13  3.2925(3)  .  '3 766'  ?
  C8  H4  3.293(8)  .  .  ?
  F3a  H4a  3.293(16)  .  .  ?
  C6  H4  3.309(10)  .  .  ?
  C1  H11  3.310(10)  .  '3 776'  ?
  O3  C11  3.313(12)  .  '4 465'  ?
  N1  H4b  3.315(6)  .  .  ?
  C4  H6  3.319(9)  .  .  ?
  C7  H5  3.319(9)  .  .  ?
  O2  O3  3.320(10)  .  '2 646'  ?
  H4b  H7  3.3247(3)  .  '3 676'  ?
  O6b  H4  3.33(2)  .  '3 666'  ?
  C9  H13  3.330(8)  .  .  ?
  C13  H11  3.330(9)  .  .  ?
  O7a  H4  3.337(18)  .  '3 666'  ?
  N2  H12  3.339(6)  .  .  ?
  C10  H12  3.342(9)  .  .  ?
  O4  C9  3.345(10)  .  .  ?
  C2  C13  3.345(13)  .  .  ?
  O5a  F3b  3.35(4)  .  .  ?
  C11  H13  3.346(10)  .  .  ?
  O3  C1  3.346(11)  .  '2 646'  ?
  C8  H6  3.355(8)  .  .  ?
  C5  H7  3.357(10)  .  .  ?
  O4  C8  3.357(10)  .  .  ?
  N1  H5  3.358(6)  .  .  ?
  N1  H7  3.358(6)  .  .  ?
  O3  C12  3.359(12)  .  '4 465'  ?
  C12  H10  3.362(10)  .  .  ?
  C9  H11  3.363(8)  .  .  ?
  C13  H4a  3.371(8)  .  .  ?
  O7a  F3a  3.37(3)  .  .  ?
  N2  H10  3.372(6)  .  .  ?
  C2  H4b  3.374(10)  .  .  ?
  O1  C6  3.386(13)  .  '2 646'  ?
  O7a  H4a  3.391(19)  .  '3 666'  ?
  S  H10  3.394(3)  .  '1 545'  ?
  O2  C4  3.395(11)  .  '2 646'  ?
  O2  C12  3.429(12)  .  '3 766'  ?
  O3  C1  3.434(13)  .  .  ?
  F2b  H5  3.44(2)  .  '4 564'  ?
  H4a  H13  3.4384(4)  .  .  ?
  O4  H7  3.453(5)  .  '3 676'  ?
  C1  H5  3.466(10)  .  '2 646'  ?
  O1  C3  3.471(11)  .  '2 656'  ?
  O5b  H10  3.479(16)  .  '1 545'  ?
  O1  C3  3.483(12)  .  .  ?
  H10  H5  3.4837(3)  .  '3 676'  ?
  O5a  H6  3.48(3)  .  '3 676'  ?
  O5a  F2a  3.49(3)  .  .  ?
  O4  C6  3.500(11)  .  '3 676'  ?
  O2  C3  3.500(12)  .  .  ?
  O7b  F1a  3.52(3)  .  .  ?
  O3  C2  3.516(12)  .  .  ?
  C2  H12  3.525(10)  .  '3 766'  ?
  H4b  H6  3.5258(4)  .  '1 545'  ?
  O5a  H7  3.53(3)  .  '1 545'  ?
  O6a  F3a  3.54(3)  .  .  ?
  O7b  H7  3.542(18)  .  '1 545'  ?
  C2  O1  3.546(12)  .  .  ?
  C10  C12  3.553(13)  .  '3 776'  ?
  O7b  F3b  3.56(3)  .  .  ?
  F1a  H12  3.562(17)  .  .  ?
  H4b  H4b  3.5645(3)  .  '3 666'  ?
  F1b  H4b  3.57(3)  .  '3 666'  ?
  C10  H5  3.574(8)  .  '3 676'  ?
  O2  C1  3.577(11)  .  .  ?
  F3b  H4  3.58(3)  .  '4 564'  ?
  O7a  F1a  3.58(3)  .  .  ?
  C5  C1  3.582(14)  .  '2 656'  ?
  O6b  F2b  3.58(3)  .  .  ?
  O2  H4a  3.586(7)  .  .  ?
  N2  H11  3.589(6)  .  '3 776'  ?
  O2  C3  3.590(11)  .  '2 646'  ?
  H12  H10  3.6011(3)  .  '3 776'  ?
  C9  C4  3.607(12)  .  .  ?
  O4  C4  3.609(10)  .  .  ?
  O7b  O7b  3.62(3)  .  '3 666'  ?
  F1b  H5  3.62(3)  .  '4 564'  ?
  C12  H10  3.621(9)  .  '3 776'  ?
  O5a  H13  3.62(3)  .  '3 766'  ?
  O4  C13  3.637(10)  .  .  ?
  O7a  H6  3.644(18)  .  '1 545'  ?
  O7a  F2b  3.65(3)  .  .  ?
  C8  C13  3.646(12)  .  .  ?
  C9  H4a  3.649(8)  .  .  ?
  C3  H12  3.667(9)  .  '4 465'  ?
  N1  H4a  3.668(6)  .  .  ?
  O3  H4b  3.670(7)  .  .  ?
  C5  H10  3.670(9)  .  '3 676'  ?
  C3  H11  3.672(9)  .  '4 465'  ?
  C2  C4  3.681(12)  .  '2 646'  ?
  N1  C10  3.682(11)  .  .  ?
  O6b  F3a  3.68(3)  .  .  ?
  C9  H11  3.686(8)  .  '3 776'  ?
  N1  O3  3.687(9)  .  '2 656'  ?
  N2  C7  3.690(11)  .  .  ?
  C14  H4  3.703(19)  .  '4 564'  ?
  O5b  F2a  3.70(2)  .  .  ?
  O5b  F1b  3.70(3)  .  .  ?
  C1  H13  3.704(10)  .  .  ?
  C10  H12  3.708(8)  .  '3 776'  ?
  F2a  H10  3.709(19)  .  '2 645'  ?
  O2  H13  3.712(7)  .  '3 766'  ?
  C13  C1  3.713(14)  .  .  ?
  C8  C6  3.716(12)  .  '3 676'  ?
  F2b  F3b  3.72(3)  .  '2 655'  ?
  C9  H6  3.718(8)  .  '3 676'  ?
  S  H13  3.718(3)  .  '3 766'  ?
  C7  C7  3.721(12)  .  '3 676'  ?
  C10  C11  3.722(12)  .  '3 776'  ?
  C13  H10  3.726(8)  .  '3 776'  ?
  F2a  F3a  3.73(3)  .  '2 645'  ?
  C6  H4a  3.729(10)  .  '3 676'  ?
  C8  O3  3.735(11)  .  '2 656'  ?
  C14  H11  3.74(2)  .  '2 645'  ?
  C9  C1  3.744(13)  .  .  ?
  C9  C6  3.745(13)  .  .  ?
  C8  C1  3.749(12)  .  .  ?
  C9  C11  3.751(12)  .  '3 776'  ?
  C4  H7  3.752(8)  .  '3 676'  ?
  O6a  H11  3.76(3)  .  '1 545'  ?
  F1b  F3b  3.76(4)  .  '2 655'  ?
  O6a  H12  3.76(3)  .  '3 766'  ?
  F3b  H10  3.76(3)  .  '1 545'  ?
  C8  C11  3.766(12)  .  .  ?
  C3  H4a  3.771(9)  .  .  ?
  C4  H7  3.774(8)  .  .  ?
  C11  C11  3.777(13)  .  '3 776'  ?
  C4  H4b  3.780(9)  .  .  ?
  C8  H5  3.782(8)  .  .  ?
  C7  H4  3.783(9)  .  .  ?
  C8  H6  3.785(8)  .  '3 676'  ?
  C4  C1  3.794(13)  .  .  ?
  F1a  H13  3.795(16)  .  '3 766'  ?
  O4  H4  3.797(6)  .  .  ?
  O4  H4b  3.798(5)  .  '3 666'  ?
  C9  H12  3.803(8)  .  '3 776'  ?
  N2  H4b  3.807(6)  .  .  ?
  C10  H13  3.809(8)  .  .  ?
  C1  H4  3.815(10)  .  .  ?
  C9  H12  3.817(8)  .  .  ?
  N2  H11  3.817(6)  .  .  ?
  C13  H10  3.817(8)  .  .  ?
  C5  H7  3.820(10)  .  '3 676'  ?
  N1  H6  3.832(6)  .  .  ?
  C7  C6  3.832(13)  .  '3 676'  ?
  C13  H11  3.834(8)  .  '3 776'  ?
  N2  C11  3.844(11)  .  '3 776'  ?
  C9  C12  3.845(12)  .  '3 776'  ?
  C3  C1  3.846(12)  .  '2 646'  ?
  N2  O1  3.846(10)  .  .  ?
  O4  C7  3.847(10)  .  '3 676'  ?
  C10  C13  3.847(12)  .  '3 776'  ?
  C8  C7  3.850(12)  .  '3 676'  ?
  O4  H13  3.851(5)  .  .  ?
  C11  C12  3.856(14)  .  '3 776'  ?
  F1b  H10  3.86(3)  .  '2 645'  ?
  O4  H4a  3.864(5)  .  '3 666'  ?
  O4  O2  3.866(9)  .  .  ?
  C9  C6  3.873(12)  .  '3 676'  ?
  C7  H12  3.874(9)  .  '3 776'  ?
  F1b  H6  3.87(3)  .  '3 676'  ?
  O3  C4  3.878(11)  .  .  ?
  F2a  F2b  3.88(3)  .  '2 645'  ?
  O6b  H4a  3.88(2)  .  .  ?
  C10  C5  3.883(12)  .  '3 676'  ?
  N1  H7  3.885(6)  .  '3 676'  ?
  F2a  H4b  3.89(2)  .  '3 666'  ?
  C13  C11  3.889(13)  .  '3 776'  ?
  F2b  H13  3.889(19)  .  .  ?
  C6  H4b  3.892(10)  .  '3 676'  ?
  F1b  H5  3.89(3)  .  '3 676'  ?
  C8  H12  3.901(8)  .  '3 776'  ?
  O5b  H4b  3.904(16)  .  '3 666'  ?
  O7b  H6  3.91(2)  .  '1 545'  ?
  N1  O1  3.911(10)  .  .  ?
  F3a  H12  3.912(16)  .  .  ?
  C14  H4b  3.914(19)  .  '3 666'  ?
  F3b  H13  3.92(3)  .  '3 766'  ?
  O6a  H4a  3.92(3)  .  .  ?
  F2b  H5  3.94(2)  .  '3 676'  ?
  C14  H4a  3.94(2)  .  .  ?
  C1  C6  3.953(14)  .  '2 646'  ?
  O2  C13  3.965(11)  .  .  ?
  O3  C4  3.973(12)  .  '2 646'  ?
  C7  H4b  3.973(9)  .  '3 676'  ?
  F3a  H4b  3.976(17)  .  '3 666'  ?
  N1  C13  3.978(11)  .  .  ?
  S  H6  3.978(3)  .  '3 676'  ?
  N1  O3  3.982(9)  .  .  ?
  C11  H5  3.982(9)  .  '3 676'  ?
  N2  C4  3.984(11)  .  .  ?
  O2  C5  3.994(12)  .  '2 646'  ?
  O2  H5  3.995(7)  .  '2 646'  ?
  C6  H7  4.002(10)  .  '3 676'  ?
  O1  H4b  4.006(8)  .  '2 656'  ?
  N2  H6  4.009(6)  .  '3 676'  ?
  C8  H4a  4.015(8)  .  .  ?
  O2  C13  4.016(11)  .  '3 766'  ?
  C8  H7  4.018(8)  .  '3 676'  ?
  C4  H10  4.024(8)  .  '3 676'  ?
  C7  C5  4.024(13)  .  '3 676'  ?
  C6  H10  4.026(10)  .  .  ?
  C9  H5  4.028(8)  .  '3 676'  ?
  O1  C11  4.032(12)  .  '3 776'  ?
  C2  C5  4.034(13)  .  '2 646'  ?
  O4  O3  4.037(9)  .  .  ?
  C11  H7  4.038(10)  .  .  ?
  C10  H11  4.040(8)  .  '3 776'  ?
  S  H13  4.047(3)  .  .  ?
  O1  C4  4.048(11)  .  '2 646'  ?
  N2  O2  4.049(9)  .  .  ?
  O6b  F2b  4.06(3)  .  '2 645'  ?
  N2  C3  4.059(11)  .  .  ?
  C7  O3  4.062(11)  .  '2 656'  ?
  C3  C4  4.066(12)  .  '2 646'  ?
  O4  C1  4.067(11)  .  .  ?
  N1  C2  4.067(12)  .  .  ?
  O2  C1  4.073(13)  .  '2 646'  ?
  N1  C7  4.084(11)  .  '3 676'  ?
  C4  C1  4.086(13)  .  '2 656'  ?
  C9  C5  4.096(12)  .  '3 676'  ?
  O3  O1  4.105(11)  .  .  ?
  C14  F3b  4.11(4)  .  '2 655'  ?
  S  H4b  4.114(3)  .  .  ?
  C7  C4  4.129(12)  .  '3 676'  ?
  C10  C6  4.130(13)  .  '3 676'  ?
  N1  O2  4.141(9)  .  '2 656'  ?
  N1  C3  4.141(11)  .  '2 656'  ?
  C10  C10  4.151(12)  .  '3 776'  ?
  C8  C5  4.157(12)  .  '3 676'  ?
  O2  O1  4.169(11)  .  '2 646'  ?
  O2  O3  4.177(11)  .  .  ?
  C9  C5  4.180(12)  .  .  ?
  N1  C6  4.183(12)  .  '3 676'  ?
  C2  O1  4.184(13)  .  '2 646'  ?
  C8  C12  4.194(12)  .  .  ?
  C9  O3  4.209(10)  .  '2 656'  ?
  F2a  F3b  4.22(4)  .  '2 655'  ?
  C11  C1  4.229(14)  .  '3 776'  ?
  S  H4a  4.250(3)  .  '3 666'  ?
  O6b  F1b  4.26(3)  .  '2 645'  ?
  N2  C10  4.261(10)  .  '3 776'  ?
  O2  O1  4.272(10)  .  .  ?
  O4  O4  4.273(8)  .  '3 666'  ?
  C3  C5  4.285(13)  .  '2 646'  ?
  C2  C1  4.295(14)  .  '2 646'  ?
  O6a  F1b  4.30(4)  .  '2 645'  ?
  O3  C5  4.303(12)  .  '2 646'  ?
  C8  C12  4.318(12)  .  '3 776'  ?
  O3  C6  4.320(12)  .  '2 646'  ?
  O3  C2  4.325(12)  .  '2 656'  ?
  C8  C3  4.325(12)  .  .  ?
  O5a  O7b  4.33(3)  .  '3 666'  ?
  O6b  F1a  4.34(3)  .  '2 645'  ?
  O6b  F2a  4.34(3)  .  '2 645'  ?
  Re1  C7  4.358(9)  .  .  ?
  Re1  C10  4.366(8)  .  .  ?
  C7  C11  4.371(13)  .  .  ?
  C12  C12  4.377(14)  .  '3 776'  ?
  N1  C2  4.379(11)  .  '2 656'  ?
  N2  C12  4.383(12)  .  '3 776'  ?
  C10  C6  4.384(13)  .  .  ?
  C9  C2  4.384(12)  .  .  ?
  C9  C10  4.402(12)  .  '3 776'  ?
  C7  O1  4.402(12)  .  '2 656'  ?
  C6  C6  4.403(14)  .  '3 676'  ?
  C8  C3  4.417(12)  .  '2 656'  ?
  C3  C12  4.421(13)  .  '4 465'  ?
  C2  C3  4.421(13)  .  '2 646'  ?
  C3  C11  4.422(13)  .  '4 465'  ?
  C8  C11  4.427(12)  .  '3 776'  ?
  Re1  C12  4.428(10)  .  .  ?
  Re1  C5  4.428(10)  .  .  ?
  C8  C8  4.431(11)  .  '3 676'  ?
  Re1  H11  4.4476(5)  .  '3 776'  ?
  Re1  O3  4.490(7)  .  '2 656'  ?
  Re1  O2  4.612(7)  .  '2 656'  ?
  Re1  C4  4.769(8)  .  '2 646'  ?
  Re1  C5  4.772(9)  .  '2 646'  ?
  Re1  O1  4.784(8)  .  '2 646'  ?
  Re1  C6  4.919(10)  .  .  ?
  Re1  C11  4.926(9)  .  .  ?
 
_atom_sites_solution_primary           ?
_atom_sites_solution_secondary         ?
_atom_sites_solution_hydrogens         ?
 
_geom_special_details                  ?
 
 
_cell_special_details
;      ?
;
 
_exptl_special_details
;      ?
;
 
_diffrn_special_details
;      ?
;
 
_chemical_compound_source              ?
_chemical_name_systematic              ?
_chemical_name_common                  ?
_chemical_formula_analytical           ?
_chemical_formula_structural           ?
 
_exptl_crystal_F_000                   1128
 
loop_
_diffrn_standard_refln_index_h
_diffrn_standard_refln_index_k
_diffrn_standard_refln_index_l
  ?  ?  ?
loop_
_diffrn_attenuator_code
_diffrn_attenuator_scale
  ?  ?
 
_reflns_limit_h_min                    0
_reflns_limit_h_max                    14
_reflns_limit_k_min                    0
_reflns_limit_k_max                    13
_reflns_limit_l_min                    -23
_reflns_limit_l_max                    23
_reflns_number_observed                ?
_reflns_d_resolution_high              .73
_reflns_d_resolution_low               9.389
 
_diffrn_reflns_av_sigmaI/netI          .026
_diffrn_reflns_theta_min               2.17
_diffrn_reflns_reduction_process       ?
 
_diffrn_ambient_temperature            293
_diffrn_radiation_source               ?
_diffrn_radiation_monochromator        ?
_diffrn_radiation_detector             ?
 
_refine_ls_extinction_expression      'Eq22 p292 "Cryst. Comp." Munksgaard 1970'
_refine_ls_matrix_type                 full
_refine_ls_number_restraints           0
_refine_ls_number_constraints          0
_refine_ls_R_factor_all                .062
_refine_ls_wR_factor_all               .084
_refine_ls_goodness_of_fit_all         .924
_refine_ls_shift/su_mean               .005
 
 
 
#==========================================================================
#       Structure Factor lists should be submitted as separate files
#==========================================================================
 
#data_<structure> # but for xtal use the refln data is needed in same block
 
loop_
_refln_index_h
_refln_index_k
_refln_index_l
_refln_F_meas
_refln_F_calc
_refln_F_sigma
_refln_F_squared_meas
_refln_F_squared_calc
_refln_F_squared_sigma
_refln_observed_status
_refln_F_meas_friedel
_refln_F_sigma_friedel
_refln_F_squared_meas_friedel
_refln_F_squared_sigma_friedel
    0   0   2  22.181  15.326  ? 492.005 234.901   2.333  o  ?  ?  ?  ?
    0   0   4 271.046 261.737  ? 73465.9 68506.2 1787.22  o  ?  ?  ?  ?
    0   0   6  69.612  68.079  ? 4845.77 4634.78  45.160  o  ?  ?  ?  ?
    0   0   8 126.086 125.745  ? 15897.7 15811.9 250.360  o  ?  ?  ?  ?
    0   0  10 181.149 162.364  ? 32815.0 26362.1 11547.7  o  ?  ?  ?  ?
    0   0  12  58.526  57.809  ? 3425.27 3341.92 100.381  o  ?  ?  ?  ?
    0   0  14 118.563 118.314  ? 14057.1 13998.1 1448.58  o  ?  ?  ?  ?
    0   0  16  13.779   9.933  ? 189.850  98.659  88.513  o  ?  ?  ?  ?
    0   0  18  64.673  61.824  ? 4182.60 3822.18 457.195  o  ?  ?  ?  ?
    0   0  20  28.285  27.513  ? 800.024 756.949 204.360  o  ?  ?  ?  ?
    0   0  22  39.132  36.737  ? 1531.31 1349.59 329.214  o  ?  ?  ?  ?
    0   1   1  47.193  42.254  ? 2227.19 1785.41   6.584  o  ?  ?  ?  ?
    0   1   2 319.111 323.352  ? 101832. 104557. 14133.5  o  ?  ?  ?  ?
    0   1   3 126.157 127.342  ? 15915.7 16215.9 1557.51  o  ?  ?  ?  ?
    0   1   4  67.842  63.700  ? 4602.52 4057.63  37.322  o  ?  ?  ?  ?
    0   1   5  14.132  12.427  ? 199.705 154.441   1.209  o  ?  ?  ?  ?
    0   1   6 179.939 179.604  ? 32378.0 32257.6 885.163  o  ?  ?  ?  ?
    0   1   7  29.374  29.129  ? 862.851 848.500   5.677  o  ?  ?  ?  ?
    0   1   8 136.042 127.361  ? 18507.3 16220.8 367.980  o  ?  ?  ?  ?
    0   1   9   8.719   9.811  ?  76.029  96.247   3.359  o  ?  ?  ?  ?
    0   1  10 129.988 123.836  ? 16896.8 15335.3 446.804  o  ?  ?  ?  ?
    0   1  11  12.870   8.948  ? 165.626  80.073   7.897  o  ?  ?  ?  ?
    0   1  12 117.155 115.497  ? 13725.2 13339.5 550.336  o  ?  ?  ?  ?
    0   1  13  18.202  16.021  ? 331.307 256.660  11.290  o  ?  ?  ?  ?
    0   1  14  23.078  24.511  ? 532.571 600.780  19.889  o  ?  ?  ?  ?
    0   1  15   4.085   7.032  ?  16.688  49.454  18.288  <  ?  ?  ?  ?
    0   1  16  86.656  83.767  ? 7509.34 7016.88 576.435  o  ?  ?  ?  ?
    0   1  17  14.755  18.189  ? 217.712 330.849  27.603  o  ?  ?  ?  ?
    0   1  18  13.755  12.607  ? 189.199 158.931  45.984  o  ?  ?  ?  ?
    0   1  19  11.541   9.344  ? 133.199  87.316  54.643  o  ?  ?  ?  ?
    0   1  20  50.391  46.677  ? 2539.22 2178.74 197.433  o  ?  ?  ?  ?
    0   1  21  12.361  13.602  ? 152.785 185.017  62.108  o  ?  ?  ?  ?
    0   1  22  22.688  21.691  ? 514.723 470.483  95.544  o  ?  ?  ?  ?
    0   1  23    .026    .473  ?    .001    .223 101.609  <  ?  ?  ?  ?
    0   2   0 128.796 128.144  ? 16588.4 16420.9 347.188  o  ?  ?  ?  ?
    0   2   1 135.643 132.539  ? 18399.0 17566.6 544.618  o  ?  ?  ?  ?
    0   2   2  42.431  39.659  ? 1800.43 1572.87   7.897  o  ?  ?  ?  ?
    0   2   3 140.105 139.443  ? 19629.5 19444.3 195.720  o  ?  ?  ?  ?
    0   2   4 147.555 155.690  ? 21772.5 24239.3 1685.40  o  ?  ?  ?  ?
    0   2   5  12.983   7.566  ? 168.547  57.243   4.572  o  ?  ?  ?  ?
    0   2   6  96.578  97.971  ? 9327.38 9598.31 136.154  o  ?  ?  ?  ?
    0   2   7  39.350  41.261  ? 1548.46 1702.50   8.961  o  ?  ?  ?  ?
    0   2   8 151.013 145.939  ? 22804.9 21298.2 769.267  o  ?  ?  ?  ?
    0   2   9  26.502  25.458  ? 702.331 648.089   6.584  o  ?  ?  ?  ?
    0   2  10 120.821 110.078  ? 14597.6 12117.1 199298.  o  ?  ?  ?  ?
    0   2  11  16.320  16.935  ? 266.359 286.798  11.290  o  ?  ?  ?  ?
    0   2  12  63.220  59.021  ? 3996.83 3483.44  90.827  o  ?  ?  ?  ?
    0   2  13  40.111  40.400  ? 1608.92 1632.19  50.221  o  ?  ?  ?  ?
    0   2  14 107.760 101.725  ? 11612.3 10347.9 838.536  o  ?  ?  ?  ?
    0   2  15  30.184  31.651  ? 911.078 1001.82  54.643  o  ?  ?  ?  ?
    0   2  16   6.508   6.526  ?  42.359  42.590  22.707  <  ?  ?  ?  ?
    0   2  17   7.848   7.891  ?  61.584  62.263  23.886  <  ?  ?  ?  ?
    0   2  18  59.527  59.952  ? 3543.41 3594.21 194.015  o  ?  ?  ?  ?
    0   2  19  25.609  26.803  ? 655.802 718.388  51.967  o  ?  ?  ?  ?
    0   2  20  17.242  16.804  ? 297.301 282.373  67.015  o  ?  ?  ?  ?
    0   2  21   5.752   7.600  ?  33.090  57.758  59.252  <  ?  ?  ?  ?
    0   2  22  30.389  31.637  ? 923.476 1000.90 127.735  o  ?  ?  ?  ?
    0   2  23  15.896  16.578  ? 252.673 274.820 441.654  <  ?  ?  ?  ?
    0   3   1  71.340  69.289  ? 5089.42 4801.03  34.396  o  ?  ?  ?  ?
    0   3   2 199.218 191.151  ? 39687.8 36538.8 2116.19  o  ?  ?  ?  ?
    0   3   3  89.125  87.413  ? 7943.23 7641.02 106.595  o  ?  ?  ?  ?
    0   3   4 128.191 127.711  ? 16432.8 16310.0 406.437  o  ?  ?  ?  ?
    0   3   5  64.551  63.927  ? 4166.86 4086.72  52.852  o  ?  ?  ?  ?
    0   3   6 126.725 125.265  ? 16059.3 15691.3 940.530  o  ?  ?  ?  ?
    0   3   7 108.731 113.719  ? 11822.4 12932.1 881.531  o  ?  ?  ?  ?
    0   3   8 122.157 126.776  ? 14922.3 16072.0 347.188  o  ?  ?  ?  ?
    0   3   9  21.126  21.838  ? 446.321 476.881  14.347  o  ?  ?  ?  ?
    0   3  10  71.215  75.176  ? 5071.56 5651.48 114.299  o  ?  ?  ?  ?
    0   3  11  68.605  69.565  ? 4706.59 4839.25 156.846  o  ?  ?  ?  ?
    0   3  12 118.570 112.990  ? 14058.7 12766.8 594.170  o  ?  ?  ?  ?
    0   3  13  27.489  29.181  ? 755.628 851.502  26.334  o  ?  ?  ?  ?
    0   3  14  24.579  24.252  ? 604.128 588.178  25.095  o  ?  ?  ?  ?
    0   3  15  37.134  36.061  ? 1378.95 1300.39  56.464  o  ?  ?  ?  ?
    0   3  16  72.307  71.751  ? 5228.33 5148.19 290.518  o  ?  ?  ?  ?
    0   3  17  18.369  18.687  ? 337.410 349.221  34.396  o  ?  ?  ?  ?
    0   3  18  14.510  15.637  ? 210.550 244.525  33.683  o  ?  ?  ?  ?
    0   3  19   8.077  11.417  ?  65.244 130.351  17.228  o  ?  ?  ?  ?
    0   3  20  39.814  42.804  ? 1585.12 1832.17 111.701  o  ?  ?  ?  ?
    0   3  21  19.425  19.493  ? 377.328 379.976  74.200  o  ?  ?  ?  ?
    0   3  22  14.076  15.620  ? 198.120 243.980  78.470  o  ?  ?  ?  ?
    0   3  23    .099    .159  ?    .010    .025 349.468  <  ?  ?  ?  ?
    0   4   0 134.885 134.883  ? 18193.9 18193.4 264.076  o  ?  ?  ?  ?
    0   4   1 112.218 108.443  ? 12592.8 11759.8 120.923  o  ?  ?  ?  ?
    0   4   2  14.726  15.163  ? 216.860 229.912   7.226  o  ?  ?  ?  ?
    0   4   3  73.192  69.530  ? 5357.10 4834.48  55.550  o  ?  ?  ?  ?
    0   4   4 133.443 131.121  ? 17807.1 17192.6 370.328  o  ?  ?  ?  ?
    0   4   5 144.739 146.144  ? 20949.3 21358.2 270.066  o  ?  ?  ?  ?
    0   4   6 109.674 108.325  ? 12028.5 11734.3 237.010  o  ?  ?  ?  ?
    0   4   7   1.757    .683  ?   3.086    .467   4.064  <  ?  ?  ?  ?
    0   4   8  76.413  73.591  ? 5839.02 5415.68 190.626  o  ?  ?  ?  ?
    0   4   9  98.669 100.693  ? 9735.57 10139.1 211.407  o  ?  ?  ?  ?
    0   4  10  97.392  95.244  ? 9485.24 9071.42 244.594  o  ?  ?  ?  ?
    0   4  11  23.191  21.123  ? 537.813 446.181  23.293  o  ?  ?  ?  ?
    0   4  12  33.300  31.525  ? 1108.86 993.835  38.072  o  ?  ?  ?  ?
    0   4  13  70.496  70.137  ? 4969.75 4919.13 209.634  o  ?  ?  ?  ?
    0   4  14  73.740  75.012  ? 5437.58 5626.87 286.368  o  ?  ?  ?  ?
    0   4  15  28.588  29.205  ? 817.284 852.959  33.683  o  ?  ?  ?  ?
    0   4  16   -.051   6.950  ?    .003  48.296  19.348  <  ?  ?  ?  ?
    0   4  17  31.622  33.440  ? 999.933 1118.21  58.316  o  ?  ?  ?  ?
    0   4  18  39.484  41.015  ? 1558.96 1682.22  95.544  o  ?  ?  ?  ?
    0   4  19  10.928  14.195  ? 119.424 201.502  37.322  o  ?  ?  ?  ?
    0   4  20  15.171  15.712  ? 230.156 246.879  42.730  o  ?  ?  ?  ?
    0   4  21   3.901   4.687  ?  15.215  21.966  40.367  <  ?  ?  ?  ?
    0   4  22  17.919  19.686  ? 321.089 387.533 194.015  o  ?  ?  ?  ?
    0   5   1  82.321  82.703  ? 6776.72 6839.75  69.031  o  ?  ?  ?  ?
    0   5   2 129.481 125.244  ? 16765.3 15686.0 180.639  o  ?  ?  ?  ?
    0   5   3 145.189 144.102  ? 21079.7 20765.5 478.334  o  ?  ?  ?  ?
    0   5   4  42.232  40.290  ? 1783.50 1623.25  29.563  o  ?  ?  ?  ?
    0   5   5  30.776  28.547  ? 947.159 814.933   9.707  o  ?  ?  ?  ?
    0   5   6  87.750  86.775  ? 7699.98 7529.94 131.911  o  ?  ?  ?  ?
    0   5   7 142.692 138.146  ? 20361.0 19084.2 779.467  o  ?  ?  ?  ?
    0   5   8  57.314  55.307  ? 3284.89 3058.82  77.391  o  ?  ?  ?  ?
    0   5   9  10.231  10.297  ? 104.675 106.033  12.555  o  ?  ?  ?  ?
    0   5  10  45.077  44.549  ? 2031.96 1984.59  52.852  o  ?  ?  ?  ?
    0   5  11  91.966  88.760  ? 8457.74 7878.37 268.062  o  ?  ?  ?  ?
    0   5  12  48.613  50.616  ? 2363.19 2561.96  62.108  o  ?  ?  ?  ?
    0   5  13  31.888  33.094  ? 1016.83 1095.24  37.322  o  ?  ?  ?  ?
    0   5  14    .406   1.765  ?    .165   3.117  15.769  <  ?  ?  ?  ?
    0   5  15  47.505  48.555  ? 2256.68 2357.63  85.098  o  ?  ?  ?  ?
    0   5  16  46.286  45.977  ? 2142.37 2113.89  90.827  o  ?  ?  ?  ?
    0   5  17  29.863  33.894  ? 891.783 1148.77  48.504  o  ?  ?  ?  ?
    0   5  18   7.123   6.746  ?  50.733  45.511  22.707  <  ?  ?  ?  ?
    0   5  19  21.862  22.626  ? 477.945 511.929  52.852  o  ?  ?  ?  ?
    0   5  20  18.460  19.660  ? 340.768 386.519  47.656  o  ?  ?  ?  ?
    0   5  21  20.543  22.347  ? 422.022 499.391  52.852  o  ?  ?  ?  ?
    0   5  22   6.844  11.075  ?  46.839 122.653 194.015  <  ?  ?  ?  ?
    0   6   0  78.005  74.343  ? 6084.79 5526.82 141.917  o  ?  ?  ?  ?
    0   6   1  96.383  91.052  ? 9289.60 8290.39 167.740  o  ?  ?  ?  ?
    0   6   2   4.619   7.134  ?  21.334  50.887   4.314  o  ?  ?  ?  ?
    0   6   3  72.346  69.383  ? 5233.90 4814.02  72.110  o  ?  ?  ?  ?
    0   6   4 101.850  99.065  ? 10373.3 9813.83 229.545  o  ?  ?  ?  ?
    0   6   5 136.436 133.495  ? 18614.7 17820.8 379.793  o  ?  ?  ?  ?
    0   6   6  55.571  54.904  ? 3088.13 3014.46  52.852  o  ?  ?  ?  ?
    0   6   7  29.209  29.558  ? 853.163 873.690  23.293  o  ?  ?  ?  ?
    0   6   8  60.538  63.215  ? 3664.82 3996.08  86.229  o  ?  ?  ?  ?
    0   6   9 105.592 102.536  ? 11149.7 10513.7 301.024  o  ?  ?  ?  ?
    0   6  10  16.771  20.494  ? 281.250 420.000  19.889  o  ?  ?  ?  ?
    0   6  11  23.804  25.931  ? 566.644 672.393  26.965  o  ?  ?  ?  ?
    0   6  12   7.809   6.329  ?  60.986  40.056  16.754  o  ?  ?  ?  ?
    0   6  13  60.589  61.483  ? 3670.97 3780.15 159.921  o  ?  ?  ?  ?
    0   6  14  33.958  33.853  ? 1153.15 1146.00  59.252  o  ?  ?  ?  ?
    0   6  15  32.277  34.787  ? 1041.84 1210.11  49.358  o  ?  ?  ?  ?
    0   6  16   5.390   5.234  ?  29.051  27.395  23.886  <  ?  ?  ?  ?
    0   6  17  33.349  34.071  ? 1112.13 1160.85  55.550  o  ?  ?  ?  ?
    0   6  18  26.935  26.301  ? 725.496 691.742  57.386  o  ?  ?  ?  ?
    0   6  19  29.566  32.179  ? 874.146 1035.47  71.076  o  ?  ?  ?  ?
    0   6  20   7.430   6.455  ?  55.208  41.663  40.367  <  ?  ?  ?  ?
    0   6  21  11.305   9.458  ? 127.801  89.444 179.000  <  ?  ?  ?  ?
    0   7   1  83.180  79.394  ? 6918.97 6303.39 110.413  o  ?  ?  ?  ?
    0   7   2  36.662  39.335  ? 1344.10 1547.26  22.128  o  ?  ?  ?  ?
    0   7   3 114.270 111.103  ? 13057.6 12343.9 316.047  o  ?  ?  ?  ?
    0   7   4  13.637  13.151  ? 185.980 172.958  13.436  o  ?  ?  ?  ?
    0   7   5  53.343  50.620  ? 2845.48 2562.40  57.386  o  ?  ?  ?  ?
    0   7   6  47.159  47.099  ? 2223.95 2218.30  48.504  o  ?  ?  ?  ?
    0   7   7  99.484  99.078  ? 9897.16 9816.46 290.518  o  ?  ?  ?  ?
    0   7   8  16.961  16.576  ? 287.683 274.772  20.994  o  ?  ?  ?  ?
    0   7   9   4.416   7.551  ?  19.499  57.021  13.436  <  ?  ?  ?  ?
    0   7  10   8.221   9.406  ?  67.579  88.473  16.257  o  ?  ?  ?  ?
    0   7  11  70.831  71.729  ? 5017.05 5145.06 146.317  o  ?  ?  ?  ?
    0   7  12  14.065  13.946  ? 197.828 194.489  26.965  o  ?  ?  ?  ?
    0   7  13  29.564  32.598  ? 874.037 1062.64  51.967  o  ?  ?  ?  ?
    0   7  14   3.965   3.184  ?  15.722  10.135  26.334  <  ?  ?  ?  ?
    0   7  15  39.895  40.608  ? 1591.61 1649.00  87.367  o  ?  ?  ?  ?
    0   7  16  17.715  18.621  ? 313.831 346.754  45.984  o  ?  ?  ?  ?
    0   7  17  34.874  34.809  ? 1216.16 1211.69  90.827  o  ?  ?  ?  ?
    0   7  18    .128    .132  ?    .016    .017  36.579  <  ?  ?  ?  ?
    0   7  19  12.338  14.436  ? 152.227 208.392  45.984  o  ?  ?  ?  ?
    0   7  20   1.932   7.579  ?   3.731  57.445 313.878  <  ?  ?  ?  ?
    0   8   0   -.577   3.788  ?    .333  14.347  14.813  <  ?  ?  ?  ?
    0   8   1  88.204  83.246  ? 7779.88 6929.83 313.878  o  ?  ?  ?  ?
    0   8   2   3.373   3.639  ?  11.376  13.241   8.244  <  ?  ?  ?  ?
    0   8   3  57.766  55.166  ? 3336.92 3043.31  74.200  o  ?  ?  ?  ?
    0   8   4    .479   2.359  ?    .229   5.567  11.290  <  ?  ?  ?  ?
    0   8   5 101.230  97.632  ? 10247.5 9531.91 690.084  o  ?  ?  ?  ?
    0   8   6   9.740   7.101  ?  94.870  50.419  15.769  o  ?  ?  ?  ?
    0   8   7  12.953   9.563  ? 167.768  91.447  20.994  o  ?  ?  ?  ?
    0   8   8   6.051    .796  ?  36.611    .633  19.889  <  ?  ?  ?  ?
    0   8   9  77.781  77.029  ? 6049.84 5933.46 266.065  o  ?  ?  ?  ?
    0   8  10   9.388   8.156  ?  88.130  66.516  25.095  o  ?  ?  ?  ?
    0   8  11  24.159  26.932  ? 583.657 725.343  40.367  o  ?  ?  ?  ?
    0   8  12    .048   4.399  ?    .002  19.354  22.128  <  ?  ?  ?  ?
    0   8  13  42.592  44.454  ? 1814.07 1976.16  91.995  o  ?  ?  ?  ?
    0   8  14   3.472   8.082  ?  12.057  65.322  28.902  <  ?  ?  ?  ?
    0   8  15  29.443  31.015  ? 866.903 961.903  67.015  o  ?  ?  ?  ?
    0   8  16   7.454   5.040  ?  55.567  25.398  36.579  <  ?  ?  ?  ?
    0   8  17  21.539  22.892  ? 463.947 524.066  56.464  o  ?  ?  ?  ?
    0   8  18    .191   1.161  ?    .036   1.347  36.579  <  ?  ?  ?  ?
    0   8  19  28.761  28.533  ? 827.212 814.134 478.334  o  ?  ?  ?  ?
    0   9   1  48.093  48.049  ? 2312.95 2308.67  67.015  o  ?  ?  ?  ?
    0   9   2  12.254  13.920  ? 150.149 193.778  16.257  o  ?  ?  ?  ?
    0   9   3  72.107  71.880  ? 5199.40 5166.75 356.354  o  ?  ?  ?  ?
    0   9   4   -.092    .779  ?    .008    .607  15.769  <  ?  ?  ?  ?
    0   9   5  26.620  24.772  ? 708.650 613.665  42.730  o  ?  ?  ?  ?
    0   9   6    .094   1.840  ?    .009   3.385  22.707  <  ?  ?  ?  ?
    0   9   7  78.870  77.342  ? 6220.51 5981.82 508.180  o  ?  ?  ?  ?
    0   9   8   6.466   6.611  ?  41.810  43.704  26.965  <  ?  ?  ?  ?
    0   9   9   4.510   4.579  ?  20.336  20.964  20.438  <  ?  ?  ?  ?
    0   9  10   7.697   9.088  ?  59.246  82.600  25.711  <  ?  ?  ?  ?
    0   9  11  43.129  43.552  ? 1860.14 1896.80  94.354  o  ?  ?  ?  ?
    0   9  12   4.241   5.318  ?  17.986  28.282  29.563  <  ?  ?  ?  ?
    0   9  13  21.010  23.650  ? 441.400 559.326  44.342  o  ?  ?  ?  ?
    0   9  14    .099    .493  ?    .010    .243  30.231  <  ?  ?  ?  ?
    0   9  15  28.346  29.442  ? 803.498 866.844  74.200  o  ?  ?  ?  ?
    0   9  16    .071    .994  ?    .005    .989  38.072  <  ?  ?  ?  ?
    0   9  17  26.404  25.726  ? 697.170 661.803 111.701  o  ?  ?  ?  ?
    0  10   0  10.172  15.070  ? 103.463 227.115  68.019  <  ?  ?  ?  ?
    0  10   1  51.450  49.147  ? 2647.15 2415.44 134.733  o  ?  ?  ?  ?
    0  10   2   2.776   3.278  ?   7.708  10.743  31.589  <  ?  ?  ?  ?
    0  10   3  26.429  26.331  ? 698.518 693.309  38.072  o  ?  ?  ?  ?
    0  10   4  13.526  14.819  ? 182.947 219.592  35.844  o  ?  ?  ?  ?
    0  10   5  61.156  58.441  ? 3740.01 3415.34 340.392  o  ?  ?  ?  ?
    0  10   6    .285   3.479  ?    .081  12.102  23.886  <  ?  ?  ?  ?
    0  10   7    .257   2.917  ?    .066   8.508  25.711  <  ?  ?  ?  ?
    0  10   8   6.625   4.135  ?  43.889  17.097  30.906  <  ?  ?  ?  ?
    0  10   9  57.204  57.943  ? 3272.27 3357.39 266.065  o  ?  ?  ?  ?
    0  10  10   6.499   7.581  ?  42.237  57.472  32.280  <  ?  ?  ?  ?
    0  10  11   8.441   9.107  ?  71.249  82.946  34.396  <  ?  ?  ?  ?
    0  10  12  12.158  11.769  ? 147.815 138.510  36.579  o  ?  ?  ?  ?
    0  10  13  34.656  33.439  ? 1201.04 1118.18  93.171  o  ?  ?  ?  ?
    0  10  14   1.325   4.520  ?   1.755  20.432  40.367  <  ?  ?  ?  ?
    0  10  15  18.933  16.979  ? 358.454 288.284 344.915  o  ?  ?  ?  ?
    0  10  16    .049   2.344  ?    .002   5.493 342.650  <  ?  ?  ?  ?
    0  11   1  39.017  36.719  ? 1522.31 1348.28 109.133  o  ?  ?  ?  ?
    0  11   2  21.600  20.735  ? 466.553 429.953  62.108  o  ?  ?  ?  ?
    0  11   3  45.510  40.792  ? 2071.20 1663.98 237.010  o  ?  ?  ?  ?
    0  11   4   9.490   9.910  ?  90.055  98.212  60.197  <  ?  ?  ?  ?
    0  11   5  11.575  13.910  ? 133.974 193.486  35.116  o  ?  ?  ?  ?
    0  11   6  17.745  18.615  ? 314.891 346.533  45.984  o  ?  ?  ?  ?
    0  11   7  48.054  45.855  ? 2309.22 2102.71 213.187  o  ?  ?  ?  ?
    0  11   8   9.960  10.607  ?  99.210 112.512  40.367  o  ?  ?  ?  ?
    0  11   9   7.803   6.806  ?  60.881  46.323  40.367  <  ?  ?  ?  ?
    0  11  10   9.601   6.165  ?  92.174  38.013  49.358  o  ?  ?  ?  ?
    0  11  11  36.197  35.822  ? 1310.20 1283.21 126.357  o  ?  ?  ?  ?
    0  11  12  13.096  12.849  ? 171.517 165.098  82.859  o  ?  ?  ?  ?
    0  11  13  12.583  11.296  ? 158.330 127.604 224.025  <  ?  ?  ?  ?
    0  12   0  16.193  16.555  ? 262.216 274.066 262.094  o  ?  ?  ?  ?
    0  12   1  28.458  29.289  ? 809.844 857.834 119.583  o  ?  ?  ?  ?
    0  12   2   7.767   7.742  ?  60.327  59.938 111.701  <  ?  ?  ?  ?
    0  12   3  16.414  17.494  ? 269.420 306.028 123.625  o  ?  ?  ?  ?
    0  12   4  22.938  20.752  ? 526.137 430.633 146.317  o  ?  ?  ?  ?
    0  12   5  32.138  29.731  ? 1032.87 883.934 185.599  o  ?  ?  ?  ?
    0  12   6  15.486  14.352  ? 239.814 205.976 115.609  o  ?  ?  ?  ?
    0  12   7    .107   4.352  ?    .012  18.937  94.354  <  ?  ?  ?  ?
    0  12   8   9.663  10.289  ?  93.365 105.873  50.221  o  ?  ?  ?  ?
    0  12   9  25.727  24.668  ? 661.884 608.511 153.800  o  ?  ?  ?  ?
    0  12  10  15.233  15.214  ? 232.053 231.473 102.845  o  ?  ?  ?  ?
    0  13   1  15.470  14.498  ? 239.325 210.193 316.047  o  ?  ?  ?  ?
    0  13   2  22.005  19.179  ? 484.232 367.835 372.683  o  ?  ?  ?  ?
    0  13   3  21.240  19.279  ? 451.151 371.669 311.717  o  ?  ?  ?  ?
    1   0 -23  30.973  31.051  ? 959.347 964.145 266.065  o  ?  ?  ?  ?
    1   0 -21   6.699  13.389  ?  44.874 179.254 119.583  <  ?  ?  ?  ?
    1   0 -19  47.190  43.817  ? 2226.86 1919.90 324.795  o  ?  ?  ?  ?
    1   0 -17  61.574  57.324  ? 3791.34 3286.07 399.081  o  ?  ?  ?  ?
    1   0 -15  59.827  57.265  ? 3579.22 3279.23 280.199  o  ?  ?  ?  ?
    1   0 -13 160.396 143.537  ? 25727.0 20602.9 6483.30  o  ?  ?  ?  ?
    1   0 -11  45.374  46.330  ? 2058.80 2146.51  41.148  o  ?  ?  ?  ?
    1   0  -9 242.868 236.413  ? 58984.9 55891.3 7045.93  o  ?  ?  ?  ?
    1   0  -7  11.861  14.331  ? 140.679 205.366   3.139  o  ?  ?  ?  ?
    1   0  -5 312.040 293.052  ? 97369.1 85879.6 6336.57  o  ?  ?  ?  ?
    1   0  -3  63.507  64.871  ? 4033.11 4208.28  57.386  o  ?  ?  ?  ?
    1   0  -1 211.375 199.845  ? 44679.4 39938.0 524.841  o  ?  ?  ?  ?
    1   0   1 150.804 169.871  ? 22741.8 28856.3 329.214  o  ?  ?  ?  ?
    1   0   3 116.052 109.625  ? 13468.1 12017.7 225.858  o  ?  ?  ?  ?
    1   0   5 164.672 152.288  ? 27116.8 23191.7 970.746  o  ?  ?  ?  ?
    1   0   7  15.626  16.274  ? 244.178 264.834   5.972  o  ?  ?  ?  ?
    1   0   9 252.057 248.848  ? 63532.6 61925.5 5179.12  o  ?  ?  ?  ?
    1   0  11  38.387  42.236  ? 1473.56 1783.85  30.906  o  ?  ?  ?  ?
    1   0  13 148.234 141.150  ? 21973.2 19923.3 993.721  o  ?  ?  ?  ?
    1   0  15  72.301  70.862  ? 5227.40 5021.40 248.430  o  ?  ?  ?  ?
    1   0  17  50.624  50.636  ? 2562.82 2563.96 327.001  o  ?  ?  ?  ?
    1   0  19  43.121  44.838  ? 1859.45 2010.49 284.304  o  ?  ?  ?  ?
    1   0  21   8.408   8.522  ?  70.688  72.633 119.583  <  ?  ?  ?  ?
    1   0  23  32.880  33.539  ? 1081.09 1124.86 449.391  o  ?  ?  ?  ?
    1   1 -23   3.495   3.331  ?  12.216  11.093  79.556  <  ?  ?  ?  ?
    1   1 -22    .151   7.815  ?    .023  61.076  65.030  <  ?  ?  ?  ?
    1   1 -21  43.725  41.957  ? 1911.87 1760.35 170.920  o  ?  ?  ?  ?
    1   1 -20  12.626  12.789  ? 159.416 163.566  54.643  o  ?  ?  ?  ?
    1   1 -19  32.661  33.229  ? 1066.72 1104.15  96.742  o  ?  ?  ?  ?
    1   1 -18   2.486   3.646  ?   6.178  13.294  41.148  <  ?  ?  ?  ?
    1   1 -17  54.927  52.281  ? 3016.92 2733.33 262.094  o  ?  ?  ?  ?
    1   1 -16  20.858  18.618  ? 435.056 346.628  45.160  o  ?  ?  ?  ?
    1   1 -15  88.697  85.925  ? 7867.21 7383.12 558.968  o  ?  ?  ?  ?
    1   1 -14  15.011  11.998  ? 225.333 143.954  19.889  o  ?  ?  ?  ?
    1   1 -13  69.871  67.761  ? 4881.91 4591.58 147.799  o  ?  ?  ?  ?
    1   1 -12  45.786  47.061  ? 2096.34 2214.73  64.048  o  ?  ?  ?  ?
    1   1 -11 164.191 158.870  ? 26958.6 25239.8 989.873  o  ?  ?  ?  ?
    1   1 -10  25.071  25.206  ? 628.550 635.356   7.226  o  ?  ?  ?  ?
    1   1  -9  28.057  26.561  ? 787.177 705.471   9.707  o  ?  ?  ?  ?
    1   1  -8  55.824  53.931  ? 3116.28 2908.58  30.231  o  ?  ?  ?  ?
    1   1  -7 244.084 228.918  ? 59577.0 52403.6 2608.42  o  ?  ?  ?  ?
    1   1  -6 174.870 158.084  ? 30579.5 24990.4 1044.42  o  ?  ?  ?  ?
    1   1  -5  19.897  13.387  ? 395.873 179.202   2.523  o  ?  ?  ?  ?
    1   1  -4  40.395  39.636  ? 1631.75 1571.04  11.290  o  ?  ?  ?  ?
    1   1  -3 249.494 245.581  ? 62247.3 60310.1 2184.18  o  ?  ?  ?  ?
    1   1  -2  55.050  51.713  ? 3030.47 2674.20  11.704  o  ?  ?  ?  ?
    1   1  -1 182.546 189.942  ? 33323.0 36077.9 772.659  o  ?  ?  ?  ?
    1   1   0  10.040   4.189  ? 100.795  17.545    .452  o  ?  ?  ?  ?
    1   1   1 204.280 200.147  ? 41730.5 40058.6 1934.77  o  ?  ?  ?  ?
    1   1   2  81.280  79.426  ? 6606.41 6308.47  80.649  o  ?  ?  ?  ?
    1   1   3 182.912 176.844  ? 33456.8 31273.6 333.663  o  ?  ?  ?  ?
    1   1   4  98.996  92.133  ? 9800.19 8488.43 144.843  o  ?  ?  ?  ?
    1   1   5  27.280  23.820  ? 744.210 567.411   5.109  o  ?  ?  ?  ?
    1   1   6   4.442   4.893  ?  19.732  23.940   1.493  o  ?  ?  ?  ?
    1   1   7 220.721 214.575  ? 48717.7 46042.2 1076.25  o  ?  ?  ?  ?
    1   1   8  59.135  61.210  ? 3496.97 3746.72  23.293  o  ?  ?  ?  ?
    1   1   9  50.084  50.394  ? 2508.38 2539.60  16.754  o  ?  ?  ?  ?
    1   1  10   5.957   2.916  ?  35.486   8.504   3.587  o  ?  ?  ?  ?
    1   1  11 166.124 161.615  ? 27597.2 26119.4 940.530  o  ?  ?  ?  ?
    1   1  12  45.621  48.274  ? 2081.31 2330.42  33.683  o  ?  ?  ?  ?
    1   1  13  47.648  47.722  ? 2270.31 2277.43  50.221  o  ?  ?  ?  ?
    1   1  14  12.560  10.320  ? 157.744 106.504  21.557  o  ?  ?  ?  ?
    1   1  15  82.537  79.660  ? 6812.32 6345.70 250.360  o  ?  ?  ?  ?
    1   1  16  20.200  17.465  ? 408.048 305.031  34.396  o  ?  ?  ?  ?
    1   1  17  54.467  55.680  ? 2966.70 3100.30 119.583  o  ?  ?  ?  ?
    1   1  18   2.848   2.383  ?   8.113   5.679  42.730  <  ?  ?  ?  ?
    1   1  19  22.593  22.762  ? 510.459 518.091  71.076  o  ?  ?  ?  ?
    1   1  20   7.836  11.931  ?  61.408 142.354  55.550  <  ?  ?  ?  ?
    1   1  21  41.777  41.014  ? 1745.36 1682.17 172.521  o  ?  ?  ?  ?
    1   1  22    .166   1.289  ?    .028   1.663  74.200  <  ?  ?  ?  ?
    1   1  23   9.642   4.000  ?  92.972  15.996 335.898  <  ?  ?  ?  ?
    1   2 -23  33.345  31.772  ? 1111.88 1009.43 192.317  o  ?  ?  ?  ?
    1   2 -22   6.042  10.103  ?  36.506 102.069  70.050  <  ?  ?  ?  ?
    1   2 -21  16.512  14.026  ? 272.637 196.728  69.031  o  ?  ?  ?  ?
    1   2 -20   9.428   9.618  ?  88.891  92.509  52.852  <  ?  ?  ?  ?
    1   2 -19  63.631  60.165  ? 4048.93 3619.79 389.377  o  ?  ?  ?  ?
    1   2 -18  14.860  16.066  ? 220.815 258.121  48.504  o  ?  ?  ?  ?
    1   2 -17  33.993  34.065  ? 1155.50 1160.45  57.386  o  ?  ?  ?  ?
    1   2 -16   4.020   4.925  ?  16.159  24.260  18.814  <  ?  ?  ?  ?
    1   2 -15  54.668  54.834  ? 2988.63 3006.74 172.521  o  ?  ?  ?  ?
    1   2 -14  50.472  48.107  ? 2547.46 2314.29  81.750  o  ?  ?  ?  ?
    1   2 -13 101.582  99.440  ? 10319.0 9888.37 313.878  o  ?  ?  ?  ?
    1   2 -12  24.570  25.369  ? 603.697 643.586  20.994  o  ?  ?  ?  ?
    1   2 -11  34.980  33.832  ? 1223.59 1144.60  29.563  o  ?  ?  ?  ?
    1   2 -10  72.943  67.896  ? 5320.73 4609.88  59.252  o  ?  ?  ?  ?
    1   2  -9 145.922 138.582  ? 21293.2 19204.8 375.045  o  ?  ?  ?  ?
    1   2  -8   9.793  11.541  ?  95.905 133.192   3.587  o  ?  ?  ?  ?
    1   2  -7   5.545   2.372  ?  30.750   5.625   2.926  o  ?  ?  ?  ?
    1   2  -6  69.556  72.839  ? 4838.00 5305.45  88.513  o  ?  ?  ?  ?
    1   2  -5 147.163 150.890  ? 21657.0 22767.9 648.989  o  ?  ?  ?  ?
    1   2  -4  69.588  63.764  ? 4842.45 4065.91 124.988  o  ?  ?  ?  ?
    1   2  -3  74.468  72.687  ? 5545.55 5283.47 109.133  o  ?  ?  ?  ?
    1   2  -2  88.652  87.766  ? 7859.16 7702.93  50.221  o  ?  ?  ?  ?
    1   2  -1 223.863 223.681  ? 50114.6 50033.3 1112.63  o  ?  ?  ?  ?
    1   2   0  27.969  25.224  ? 782.237 636.257   3.359  o  ?  ?  ?  ?
    1   2   1 274.500 273.923  ? 75350.5 75033.8 2005.27  o  ?  ?  ?  ?
    1   2   2  32.897  30.943  ? 1082.20 957.498   5.109  o  ?  ?  ?  ?
    1   2   3 107.889 107.490  ? 11640.1 11554.0  64.048  o  ?  ?  ?  ?
    1   2   4  21.591  14.405  ? 466.168 207.506   3.587  o  ?  ?  ?  ?
    1   2   5 111.065 112.014  ? 12335.5 12547.2 229.545  o  ?  ?  ?  ?
    1   2   6  83.712  82.760  ? 7007.72 6849.14 159.921  o  ?  ?  ?  ?
    1   2   7  14.089  17.578  ? 198.504 308.982   4.064  o  ?  ?  ?  ?
    1   2   8  31.515  32.172  ? 993.172 1035.03  10.484  o  ?  ?  ?  ?
    1   2   9 153.333 145.401  ? 23510.9 21141.3 533.272  o  ?  ?  ?  ?
    1   2  10  68.765  72.647  ? 4728.69 5277.54  58.316  o  ?  ?  ?  ?
    1   2  11  34.194  31.961  ? 1169.23 1021.51  25.711  o  ?  ?  ?  ?
    1   2  12  26.071  25.801  ? 679.678 665.682  22.707  o  ?  ?  ?  ?
    1   2  13  90.926  91.068  ? 8267.54 8293.39 207.869  o  ?  ?  ?  ?
    1   2  14  49.898  47.961  ? 2489.83 2300.30  91.995  o  ?  ?  ?  ?
    1   2  15  55.150  55.258  ? 3041.49 3053.40 134.733  o  ?  ?  ?  ?
    1   2  16   -.043   2.583  ?    .002   6.674  22.707  <  ?  ?  ?  ?
    1   2  17  39.989  41.596  ? 1599.09 1730.21  77.391  o  ?  ?  ?  ?
    1   2  18  20.493  24.240  ? 419.981 587.576  42.730  o  ?  ?  ?  ?
    1   2  19  49.752  50.067  ? 2475.27 2506.67 137.584  o  ?  ?  ?  ?
    1   2  20   5.283   2.811  ?  27.910   7.900  54.643  <  ?  ?  ?  ?
    1   2  21  17.819  18.123  ? 317.501 328.457  78.470  o  ?  ?  ?  ?
    1   2  22  12.974  14.564  ? 168.320 212.108  79.556  o  ?  ?  ?  ?
    1   2  23  30.710  29.821  ? 943.115 889.309 579.372  o  ?  ?  ?  ?
    1   3 -22  12.311  10.295  ? 151.567 105.980  71.076  o  ?  ?  ?  ?
    1   3 -21  41.284  38.854  ? 1704.34 1509.60 207.869  o  ?  ?  ?  ?
    1   3 -20  21.018  19.028  ? 441.769 362.047  73.151  o  ?  ?  ?  ?
    1   3 -19  17.667  16.031  ? 312.124 256.999  41.148  o  ?  ?  ?  ?
    1   3 -18   6.830   7.285  ?  46.645  53.075  26.965  <  ?  ?  ?  ?
    1   3 -17  59.927  56.995  ? 3591.22 3248.39 294.698  o  ?  ?  ?  ?
    1   3 -16  37.384  41.886  ? 1397.56 1754.43  80.649  o  ?  ?  ?  ?
    1   3 -15  51.566  52.578  ? 2659.03 2764.40  78.470  o  ?  ?  ?  ?
    1   3 -14   4.458   3.979  ?  19.875  15.835  15.287  <  ?  ?  ?  ?
    1   3 -13  53.552  51.981  ? 2867.84 2702.05  87.367  o  ?  ?  ?  ?
    1   3 -12  72.344  69.946  ? 5233.59 4892.46 150.785  o  ?  ?  ?  ?
    1   3 -11 108.838 105.015  ? 11845.8 11028.2 316.047  o  ?  ?  ?  ?
    1   3 -10  10.646  12.168  ? 113.343 148.065   8.961  o  ?  ?  ?  ?
    1   3  -9  15.807  20.106  ? 249.871 404.253   5.109  o  ?  ?  ?  ?
    1   3  -8  47.598  47.939  ? 2265.54 2298.13  51.967  o  ?  ?  ?  ?
    1   3  -7 113.889 115.799  ? 12970.7 13409.3 338.141  o  ?  ?  ?  ?
    1   3  -6  59.642  59.884  ? 3557.21 3586.10  58.316  o  ?  ?  ?  ?
    1   3  -5  53.704  56.787  ? 2884.14 3224.80  32.280  o  ?  ?  ?  ?
    1   3  -4  17.430  18.003  ? 303.806 324.121   3.587  o  ?  ?  ?  ?
    1   3  -3 155.042 156.259  ? 24038.0 24417.0 329.214  o  ?  ?  ?  ?
    1   3  -2  60.228  62.720  ? 3627.47 3933.78  24.487  o  ?  ?  ?  ?
    1   3  -1 181.261 181.363  ? 32855.6 32892.5 475.665  o  ?  ?  ?  ?
    1   3   0  80.994  77.839  ? 6560.08 6058.92  79.556  o  ?  ?  ?  ?
    1   3   1 111.412 110.217  ? 12412.5 12147.8  80.649  o  ?  ?  ?  ?
    1   3   2 134.100 136.055  ? 17982.7 18511.0 156.846  o  ?  ?  ?  ?
    1   3   3 160.690 165.144  ? 25821.4 27272.6 652.105  o  ?  ?  ?  ?
    1   3   4  58.115  55.511  ? 3377.37 3081.51  18.288  o  ?  ?  ?  ?
    1   3   5  75.385  57.882  ? 5682.89 3350.27 248480.  <  ?  ?  ?  ?
    1   3   6  57.955  60.688  ? 3358.76 3683.07  40.367  o  ?  ?  ?  ?
    1   3   7 141.847 138.009  ? 20120.6 19046.4 389.377  o  ?  ?  ?  ?
    1   3   8  59.952  58.885  ? 3594.30 3467.44  75.256  o  ?  ?  ?  ?
    1   3   9   8.149  10.168  ?  66.411 103.393   8.244  o  ?  ?  ?  ?
    1   3  10  57.566  56.918  ? 3313.87 3239.71  77.391  o  ?  ?  ?  ?
    1   3  11 117.392 112.192  ? 13780.9 12587.1 360.982  o  ?  ?  ?  ?
    1   3  12  59.393  58.545  ? 3527.58 3427.46 124.988  o  ?  ?  ?  ?
    1   3  13  41.619  42.152  ? 1732.11 1776.83  54.643  o  ?  ?  ?  ?
    1   3  14  11.159  11.692  ? 124.515 136.705  16.754  o  ?  ?  ?  ?
    1   3  15  46.151  49.876  ? 2129.91 2487.66  85.098  o  ?  ?  ?  ?
    1   3  16  35.252  39.970  ? 1242.67 1597.60  65.030  o  ?  ?  ?  ?
    1   3  17  52.456  52.861  ? 2751.64 2794.23 137.584  o  ?  ?  ?  ?
    1   3  18    .191   2.430  ?    .036   5.904  28.249  <  ?  ?  ?  ?
    1   3  19  20.328  22.567  ? 413.208 509.252  45.160  o  ?  ?  ?  ?
    1   3  20  20.549  20.518  ? 422.265 421.002  52.852  o  ?  ?  ?  ?
    1   3  21  39.749  38.654  ? 1579.96 1494.16 167.740  o  ?  ?  ?  ?
    1   3  22  13.252  12.839  ? 175.614 164.836  81.750  o  ?  ?  ?  ?
    1   3  23  13.854   7.521  ? 191.944  56.566 439.090  <  ?  ?  ?  ?
    1   4 -22  22.565  20.348  ? 509.169 414.039 428.908  o  ?  ?  ?  ?
    1   4 -21  10.154   9.565  ? 103.110  91.490  72.110  <  ?  ?  ?  ?
    1   4 -20   8.106   8.703  ?  65.713  75.738  59.252  <  ?  ?  ?  ?
    1   4 -19  37.355  37.716  ? 1395.39 1422.50 107.861  o  ?  ?  ?  ?
    1   4 -18  34.710  34.539  ? 1204.80 1192.93  88.513  o  ?  ?  ?  ?
    1   4 -17  30.002  30.775  ? 900.133 947.131  51.967  o  ?  ?  ?  ?
    1   4 -16    .101   1.262  ?    .010   1.593  18.288  <  ?  ?  ?  ?
    1   4 -15  46.908  44.840  ? 2200.38 2010.67  85.098  o  ?  ?  ?  ?
    1   4 -14  61.464  61.325  ? 3777.80 3760.78 144.843  o  ?  ?  ?  ?
    1   4 -13  58.798  55.360  ? 3457.16 3064.71 109.133  o  ?  ?  ?  ?
    1   4 -12  16.936  18.326  ? 286.839 335.830  13.888  o  ?  ?  ?  ?
    1   4 -11  35.025  34.832  ? 1226.73 1213.24  28.249  o  ?  ?  ?  ?
    1   4 -10  64.901  66.338  ? 4212.15 4400.72  85.098  o  ?  ?  ?  ?
    1   4  -9  97.726 100.739  ? 9550.31 10148.4 225.858  o  ?  ?  ?  ?
    1   4  -8  97.020  95.575  ? 9412.94 9134.57 266.065  o  ?  ?  ?  ?
    1   4  -7  24.617  24.737  ? 605.977 611.910   6.274  o  ?  ?  ?  ?
    1   4  -6  41.050  39.059  ? 1685.09 1525.62  14.347  o  ?  ?  ?  ?
    1   4  -5 164.119 163.842  ? 26934.9 26844.4 454.586  o  ?  ?  ?  ?
    1   4  -4 143.062 144.380  ? 20466.8 20845.6 329.214  o  ?  ?  ?  ?
    1   4  -3  76.388  77.955  ? 5835.14 6076.92  34.396  o  ?  ?  ?  ?
    1   4  -2  21.417  20.745  ? 458.696 430.349   3.822  o  ?  ?  ?  ?
    1   4  -1  63.645  65.268  ? 4050.74 4259.89  28.249  o  ?  ?  ?  ?
    1   4   0 192.931 190.642  ? 37222.5 36344.3 769.267  o  ?  ?  ?  ?
    1   4   1 143.955 137.493  ? 20723.1 18904.4 473.004  o  ?  ?  ?  ?
    1   4   2   7.188   7.324  ?  51.670  53.634   2.926  o  ?  ?  ?  ?
    1   4   3  99.634  98.873  ? 9926.93 9775.89 161.470  o  ?  ?  ?  ?
    1   4   4 121.086 123.139  ? 14661.7 15163.1 220.383  o  ?  ?  ?  ?
    1   4   5 168.940 171.010  ? 28540.8 29244.3 516.477  o  ?  ?  ?  ?
    1   4   6  58.670  54.565  ? 3442.14 2977.33  35.116  o  ?  ?  ?  ?
    1   4   7   9.868  10.517  ?  97.381 110.609   5.389  o  ?  ?  ?  ?
    1   4   8  74.125  73.882  ? 5494.47 5458.59  96.742  o  ?  ?  ?  ?
    1   4   9  93.251  96.639  ? 8695.71 9339.14 338.141  o  ?  ?  ?  ?
    1   4  10  62.458  59.458  ? 3901.05 3535.25  93.171  o  ?  ?  ?  ?
    1   4  11  32.999  34.413  ? 1088.90 1184.24  36.579  o  ?  ?  ?  ?
    1   4  12  17.011  17.221  ? 289.389 296.571  20.438  o  ?  ?  ?  ?
    1   4  13  66.411  64.670  ? 4410.44 4182.24 161.470  o  ?  ?  ?  ?
    1   4  14  55.651  58.655  ? 3096.99 3440.41 194.015  o  ?  ?  ?  ?
    1   4  15  48.491  47.711  ? 2351.42 2276.34 101.609  o  ?  ?  ?  ?
    1   4  16    .705   4.945  ?    .497  24.449  23.886  <  ?  ?  ?  ?
    1   4  17  31.908  34.228  ? 1018.10 1171.57  64.048  o  ?  ?  ?  ?
    1   4  18  35.737  36.224  ? 1277.14 1312.18  85.098  o  ?  ?  ?  ?
    1   4  19  35.152  33.554  ? 1235.66 1125.86  81.750  o  ?  ?  ?  ?
    1   4  20   7.280   8.653  ?  52.992  74.867  41.935  <  ?  ?  ?  ?
    1   4  21    .358   4.109  ?    .128  16.887  42.730  <  ?  ?  ?  ?
    1   4  22  23.792  15.842  ? 566.062 250.968 483.693  o  ?  ?  ?  ?
    1   5 -21  18.457  19.949  ? 340.655 397.943  66.019  o  ?  ?  ?  ?
    1   5 -20  26.343  28.543  ? 693.950 814.710  60.197  o  ?  ?  ?  ?
    1   5 -19   7.938  10.336  ?  63.010 106.823  28.902  <  ?  ?  ?  ?
    1   5 -18   6.246   5.444  ?  39.009  29.639  23.886  <  ?  ?  ?  ?
    1   5 -17  26.234  27.634  ? 688.240 763.617  55.550  o  ?  ?  ?  ?
    1   5 -16  54.148  52.656  ? 2931.99 2772.70 1141.36  o  ?  ?  ?  ?
    1   5 -15  45.541  43.987  ? 2073.99 1934.89  69.031  o  ?  ?  ?  ?
    1   5 -14  10.643  10.360  ? 113.276 107.331  17.258  o  ?  ?  ?  ?
    1   5 -13  18.273  18.930  ? 333.894 358.359  18.288  o  ?  ?  ?  ?
    1   5 -12  78.863  79.175  ? 6219.33 6268.67 180.639  o  ?  ?  ?  ?
    1   5 -11  59.886  57.541  ? 3586.37 3310.99  99.161  o  ?  ?  ?  ?
    1   5 -10  44.646  47.594  ? 1993.31 2265.19  48.504  o  ?  ?  ?  ?
    1   5  -9   4.421   1.757  ?  19.548   3.086   8.961  <  ?  ?  ?  ?
    1   5  -8  67.392  70.640  ? 4541.67 4990.08 147.799  o  ?  ?  ?  ?
    1   5  -7 108.235 111.302  ? 11714.7 12388.2 446.804  o  ?  ?  ?  ?
    1   5  -6 114.391 115.096  ? 13085.3 13247.1 621.277  o  ?  ?  ?  ?
    1   5  -5   3.485   4.356  ?  12.146  18.972   3.359  <  ?  ?  ?  ?
    1   5  -4  36.255  36.805  ? 1314.46 1354.58  10.484  o  ?  ?  ?  ?
    1   5  -3 104.474 103.622  ? 10914.8 10737.4 107.861  o  ?  ?  ?  ?
    1   5  -2 152.086 151.111  ? 23130.1 22834.7 318.223  o  ?  ?  ?  ?
    1   5  -1  58.242  59.172  ? 3392.07 3501.32  27.603  o  ?  ?  ?  ?
    1   5   0  38.144  37.935  ? 1454.96 1439.10  12.555  o  ?  ?  ?  ?
    1   5   1  92.405  90.735  ? 8538.71 8232.79 139.021  o  ?  ?  ?  ?
    1   5   2 148.886 148.361  ? 22167.1 22011.1 391.792  o  ?  ?  ?  ?
    1   5   3  83.662  87.410  ? 6999.35 7640.54  78.470  o  ?  ?  ?  ?
    1   5   4  44.563  44.684  ? 1985.86 1996.65  32.280  o  ?  ?  ?  ?
    1   5   5  23.400  21.917  ? 547.582 480.351  11.290  o  ?  ?  ?  ?
    1   5   6 113.438 111.968  ? 12868.3 12536.9 183.938  o  ?  ?  ?  ?
    1   5   7  86.251  89.294  ? 7439.28 7973.34 190.626  o  ?  ?  ?  ?
    1   5   8  69.101  68.936  ? 4775.01 4752.23 122.271  o  ?  ?  ?  ?
    1   5   9   5.643   5.415  ?  31.848  29.320  10.883  <  ?  ?  ?  ?
    1   5  10  71.299  73.778  ? 5083.56 5443.26 156.846  o  ?  ?  ?  ?
    1   5  11  69.680  70.301  ? 4855.31 4942.29 134.733  o  ?  ?  ?  ?
    1   5  12  52.156  51.070  ? 2720.27 2608.18  79.556  o  ?  ?  ?  ?
    1   5  13  39.033  37.125  ? 1523.57 1378.25  52.852  o  ?  ?  ?  ?
    1   5  14   4.905   7.522  ?  24.056  56.578  15.287  <  ?  ?  ?  ?
    1   5  15  41.280  40.939  ? 1704.06 1675.97  60.197  o  ?  ?  ?  ?
    1   5  16  48.012  47.968  ? 2305.16 2300.91 134.733  o  ?  ?  ?  ?
    1   5  17  26.522  28.682  ? 703.410 822.667  51.967  o  ?  ?  ?  ?
    1   5  18   9.112   7.925  ?  83.030  62.800  35.844  o  ?  ?  ?  ?
    1   5  19  11.686  13.881  ? 136.572 192.692  38.830  o  ?  ?  ?  ?
    1   5  20  29.047  30.002  ? 843.710 900.105  83.975  o  ?  ?  ?  ?
    1   5  21  16.395  18.085  ? 268.796 327.067  45.160  o  ?  ?  ?  ?
    1   5  22   7.789  11.599  ?  60.673 134.533 286.368  <  ?  ?  ?  ?
    1   6 -21    .161   3.471  ?    .026  12.049 316.047  <  ?  ?  ?  ?
    1   6 -20   6.899  10.939  ?  47.599 119.672  39.595  <  ?  ?  ?  ?
    1   6 -19  11.263  14.055  ? 126.848 197.535  38.830  o  ?  ?  ?  ?
    1   6 -18  38.684  42.420  ? 1496.44 1799.42 147.799  o  ?  ?  ?  ?
    1   6 -17  18.665  19.574  ? 348.368 383.141  44.342  o  ?  ?  ?  ?
    1   6 -16   3.629    .588  ?  13.168    .345  26.334  <  ?  ?  ?  ?
    1   6 -15  16.548  17.018  ? 273.823 289.616  30.906  o  ?  ?  ?  ?
    1   6 -14  63.490  63.719  ? 4030.93 4060.07 161.470  o  ?  ?  ?  ?
    1   6 -13  42.914  43.781  ? 1841.65 1916.74  78.470  o  ?  ?  ?  ?
    1   6 -12  27.226  28.808  ? 741.248 829.896  38.072  o  ?  ?  ?  ?
    1   6 -11  15.179  15.111  ? 230.409 228.345  17.769  o  ?  ?  ?  ?
    1   6 -10  82.250  81.033  ? 6765.07 6566.30 272.078  o  ?  ?  ?  ?
    1   6  -9  70.521  67.016  ? 4973.16 4491.17 127.735  o  ?  ?  ?  ?
    1   6  -8  91.086  92.332  ? 8296.75 8525.22 220.383  o  ?  ?  ?  ?
    1   6  -7  11.764  11.678  ? 138.389 136.377  11.704  o  ?  ?  ?  ?
    1   6  -6  67.763  71.421  ? 4591.79 5100.93  75.256  o  ?  ?  ?  ?
    1   6  -5  88.629  86.845  ? 7855.08 7542.04 140.465  o  ?  ?  ?  ?
    1   6  -4 110.856 109.574  ? 12289.1 12006.4 122.271  o  ?  ?  ?  ?
    1   6  -3  14.766  15.808  ? 218.042 249.895   6.274  o  ?  ?  ?  ?
    1   6  -2  34.525  33.021  ? 1192.00 1090.40  12.555  o  ?  ?  ?  ?
    1   6  -1  45.168  43.512  ? 2040.18 1893.31  20.438  o  ?  ?  ?  ?
    1   6   0  95.764  96.780  ? 9170.68 9366.46 156.846  o  ?  ?  ?  ?
    1   6   1  53.964  56.036  ? 2912.16 3140.02  52.852  o  ?  ?  ?  ?
    1   6   2  36.863  36.924  ? 1358.91 1363.39  16.257  o  ?  ?  ?  ?
    1   6   3  33.889  36.755  ? 1148.45 1350.93  17.769  o  ?  ?  ?  ?
    1   6   4 148.536 150.743  ? 22063.1 22723.6 769.267  o  ?  ?  ?  ?
    1   6   5  84.156  85.519  ? 7082.31 7313.52 166.161  o  ?  ?  ?  ?
    1   6   6  68.167  70.549  ? 4646.78 4977.11 111.701  o  ?  ?  ?  ?
    1   6   7   5.227   4.529  ?  27.317  20.508  10.883  <  ?  ?  ?  ?
    1   6   8  81.461  80.013  ? 6635.95 6402.02 197.433  o  ?  ?  ?  ?
    1   6   9  75.316  70.704  ? 5672.44 4999.13 206.111  o  ?  ?  ?  ?
    1   6  10  62.677  58.312  ? 3928.43 3400.33 126.357  o  ?  ?  ?  ?
    1   6  11   3.396    .271  ?  11.531    .073  14.347  <  ?  ?  ?  ?
    1   6  12  23.458  24.326  ? 550.257 591.750  31.589  o  ?  ?  ?  ?
    1   6  13  29.160  28.747  ? 850.290 826.364  38.072  o  ?  ?  ?  ?
    1   6  14  66.624  62.925  ? 4438.69 3959.59 170.920  o  ?  ?  ?  ?
    1   6  15  18.239  19.067  ? 332.657 363.558  25.711  o  ?  ?  ?  ?
    1   6  16   7.790   5.288  ?  60.679  27.965  20.994  o  ?  ?  ?  ?
    1   6  17  19.167  20.324  ? 367.373 413.057  34.396  o  ?  ?  ?  ?
    1   6  18  40.611  42.232  ? 1649.28 1783.53 102.845  o  ?  ?  ?  ?
    1   6  19  13.376  13.566  ? 178.913 184.045  43.532  o  ?  ?  ?  ?
    1   6  20   8.628   9.060  ?  74.447  82.080  44.342  <  ?  ?  ?  ?
    1   6  21   4.802   1.304  ?  23.056   1.700 187.267  <  ?  ?  ?  ?
    1   7 -20  25.478  26.404  ? 649.122 697.164 462.435  o  ?  ?  ?  ?
    1   7 -19   2.478   4.782  ?   6.143  22.864  37.322  <  ?  ?  ?  ?
    1   7 -18   8.404   8.694  ?  70.626  75.583  34.396  <  ?  ?  ?  ?
    1   7 -17  13.883  11.170  ? 192.730 124.773  37.322  o  ?  ?  ?  ?
    1   7 -16  48.693  50.322  ? 2371.03 2532.33 124.988  o  ?  ?  ?  ?
    1   7 -15  13.375  16.010  ? 178.895 256.309  30.906  o  ?  ?  ?  ?
    1   7 -14  15.090  15.512  ? 227.716 240.615  28.902  o  ?  ?  ?  ?
    1   7 -13   9.624   9.367  ?  92.620  87.732  25.711  o  ?  ?  ?  ?
    1   7 -12  70.856  71.911  ? 5020.57 5171.18 185.599  o  ?  ?  ?  ?
    1   7 -11  20.903  22.007  ? 436.922 484.293  32.280  o  ?  ?  ?  ?
    1   7 -10  52.784  51.034  ? 2786.19 2604.46 107.861  o  ?  ?  ?  ?
    1   7  -9   4.264   4.050  ?  18.185  16.401  17.769  <  ?  ?  ?  ?
    1   7  -8  69.090  65.877  ? 4773.44 4339.73 169.326  o  ?  ?  ?  ?
    1   7  -7  54.751  59.690  ? 2997.71 3562.90 104.087  o  ?  ?  ?  ?
    1   7  -6 102.967 100.467  ? 10602.1 10093.6 439.090  o  ?  ?  ?  ?
    1   7  -5   8.887  11.863  ?  78.971 140.736  10.883  o  ?  ?  ?  ?
    1   7  -4  64.250  63.435  ? 4128.09 4023.95  61.148  o  ?  ?  ?  ?
    1   7  -3  30.395  29.427  ? 923.855 865.933  19.348  o  ?  ?  ?  ?
    1   7  -2 125.862 124.136  ? 15841.1 15409.8 301.024  o  ?  ?  ?  ?
    1   7  -1  15.166  11.922  ? 229.993 142.127   8.961  o  ?  ?  ?  ?
    1   7   0   3.312   8.450  ?  10.969  71.396   4.837  <  ?  ?  ?  ?
    1   7   1   9.913  12.506  ?  98.275 156.410   7.226  o  ?  ?  ?  ?
    1   7   2  96.132 100.599  ? 9241.43 10120.2 199.154  o  ?  ?  ?  ?
    1   7   3  43.904  45.549  ? 1927.55 2074.69  36.579  o  ?  ?  ?  ?
    1   7   4  59.135  59.934  ? 3496.96 3592.06  75.256  o  ?  ?  ?  ?
    1   7   5  10.516  11.642  ? 110.589 135.545  10.883  o  ?  ?  ?  ?
    1   7   6  90.252  89.233  ? 8145.40 7962.54 266.065  o  ?  ?  ?  ?
    1   7   7  35.870  35.699  ? 1286.64 1274.41  41.935  o  ?  ?  ?  ?
    1   7   8  83.103  79.732  ? 6906.18 6357.14 260.120  o  ?  ?  ?  ?
    1   7   9   6.134   2.550  ?  37.628   6.505  14.347  <  ?  ?  ?  ?
    1   7  10  31.715  29.185  ? 1005.86 851.741  41.935  o  ?  ?  ?  ?
    1   7  11   8.501  10.804  ?  72.269 116.721  19.889  o  ?  ?  ?  ?
    1   7  12  80.529  76.738  ? 6484.91 5888.78 298.908  o  ?  ?  ?  ?
    1   7  13  11.691  13.101  ? 136.672 171.640  25.095  o  ?  ?  ?  ?
    1   7  14  13.148  14.507  ? 172.876 210.447  29.563  o  ?  ?  ?  ?
    1   7  15  17.170  15.691  ? 294.804 246.214  37.322  o  ?  ?  ?  ?
    1   7  16  49.682  50.381  ? 2468.26 2538.26 146.317  o  ?  ?  ?  ?
    1   7  17   7.544   7.539  ?  56.915  56.833  30.906  <  ?  ?  ?  ?
    1   7  18    .291   4.439  ?    .085  19.702  35.116  <  ?  ?  ?  ?
    1   7  19   5.943   7.212  ?  35.319  52.015  44.342  <  ?  ?  ?  ?
    1   8 -19    .158   4.731  ?    .025  22.384 335.898  <  ?  ?  ?  ?
    1   8 -18  30.239  30.277  ? 914.389 916.716  95.544  o  ?  ?  ?  ?
    1   8 -17    .106   1.440  ?    .011   2.073  34.396  <  ?  ?  ?  ?
    1   8 -16   2.183    .877  ?   4.765    .769  28.249  <  ?  ?  ?  ?
    1   8 -15   7.873   5.244  ?  61.989  27.498  32.978  <  ?  ?  ?  ?
    1   8 -14  49.872  50.381  ? 2487.23 2538.21 124.988  o  ?  ?  ?  ?
    1   8 -13   7.974   6.609  ?  63.580  43.682  23.886  o  ?  ?  ?  ?
    1   8 -12  22.676  22.174  ? 514.202 491.703  39.595  o  ?  ?  ?  ?
    1   8 -11   9.298   9.559  ?  86.460  91.374  24.487  o  ?  ?  ?  ?
    1   8 -10  67.972  70.323  ? 4620.21 4945.35 170.920  o  ?  ?  ?  ?
    1   8  -9   5.326   6.040  ?  28.369  36.487  21.557  <  ?  ?  ?  ?
    1   8  -8  47.395  48.631  ? 2246.30 2365.02  82.859  o  ?  ?  ?  ?
    1   8  -7  12.476  13.752  ? 155.650 189.121  22.128  o  ?  ?  ?  ?
    1   8  -6  52.707  54.492  ? 2778.05 2969.43  94.354  o  ?  ?  ?  ?
    1   8  -5  11.530  13.385  ? 132.941 179.172  18.288  o  ?  ?  ?  ?
    1   8  -4  80.929  82.654  ? 6549.44 6831.62 167.740  o  ?  ?  ?  ?
    1   8  -3  12.489  13.266  ? 155.977 175.978  12.126  o  ?  ?  ?  ?
    1   8  -2  20.173  20.317  ? 406.954 412.771  16.754  o  ?  ?  ?  ?
    1   8  -1  12.528  13.992  ? 156.947 195.780   8.244  o  ?  ?  ?  ?
    1   8   0  90.842  89.473  ? 8252.34 8005.33 242.686  o  ?  ?  ?  ?
    1   8   1    .317   1.757  ?    .101   3.086   8.961  <  ?  ?  ?  ?
    1   8   2  18.393  21.180  ? 338.309 448.604  14.347  o  ?  ?  ?  ?
    1   8   3  10.867   8.740  ? 118.088  76.385  13.888  o  ?  ?  ?  ?
    1   8   4  90.816  91.900  ? 8247.53 8445.64 254.241  o  ?  ?  ?  ?
    1   8   5    .443   1.922  ?    .196   3.693  13.436  <  ?  ?  ?  ?
    1   8   6  60.247  59.795  ? 3629.68 3575.41 126.357  o  ?  ?  ?  ?
    1   8   7   5.603   4.289  ?  31.395  18.400  15.769  <  ?  ?  ?  ?
    1   8   8  55.324  59.489  ? 3060.73 3538.89 7669.37  o  ?  ?  ?  ?
    1   8   9    .404   6.592  ?    .163  43.453  19.889  <  ?  ?  ?  ?
    1   8  10  71.497  69.314  ? 5111.81 4804.38 233.263  o  ?  ?  ?  ?
    1   8  11   5.451   3.146  ?  29.719   9.899  22.707  <  ?  ?  ?  ?
    1   8  12  24.110  24.527  ? 581.304 601.573  48.504  o  ?  ?  ?  ?
    1   8  13   4.237   4.176  ?  17.951  17.443  30.231  <  ?  ?  ?  ?
    1   8  14  52.476  49.751  ? 2753.70 2475.15 156.846  o  ?  ?  ?  ?
    1   8  15   4.630   2.559  ?  21.440   6.549  34.396  <  ?  ?  ?  ?
    1   8  16   1.721   3.494  ?   2.961  12.208  37.322  <  ?  ?  ?  ?
    1   8  17   1.668   3.182  ?   2.783  10.123  32.978  <  ?  ?  ?  ?
    1   8  18  31.057  33.673  ? 964.514 1133.90  89.666  o  ?  ?  ?  ?
    1   9 -17   6.206   2.309  ?  38.516   5.333 156.846  <  ?  ?  ?  ?
    1   9 -16  34.554  33.742  ? 1193.98 1138.50 126.357  o  ?  ?  ?  ?
    1   9 -15   2.043   3.251  ?   4.173  10.571  30.906  <  ?  ?  ?  ?
    1   9 -14   6.175   4.898  ?  38.134  23.990  29.563  <  ?  ?  ?  ?
    1   9 -13   6.860   5.555  ?  47.059  30.853  26.965  <  ?  ?  ?  ?
    1   9 -12  39.205  40.605  ? 1537.05 1648.74  79.556  o  ?  ?  ?  ?
    1   9 -11   5.546   7.927  ?  30.761  62.836  25.095  <  ?  ?  ?  ?
    1   9 -10  31.149  32.395  ? 970.269 1049.45  56.464  o  ?  ?  ?  ?
    1   9  -9   9.372   8.327  ?  87.825  69.333  26.334  o  ?  ?  ?  ?
    1   9  -8  49.803  50.324  ? 2480.30 2532.48 110.413  o  ?  ?  ?  ?
    1   9  -7  10.503  13.920  ? 110.316 193.753  28.249  o  ?  ?  ?  ?
    1   9  -6  56.354  58.139  ? 3175.80 3380.19 122.271  o  ?  ?  ?  ?
    1   9  -5   9.997   8.037  ?  99.937  64.590  17.769  o  ?  ?  ?  ?
    1   9  -4  34.519  34.905  ? 1191.55 1218.36  44.342  o  ?  ?  ?  ?
    1   9  -3    .101   8.654  ?    .010  74.895  13.888  <  ?  ?  ?  ?
    1   9  -2  77.656  75.889  ? 6030.38 5759.16 356.354  o  ?  ?  ?  ?
    1   9  -1    .701   2.091  ?    .492   4.370  15.287  <  ?  ?  ?  ?
    1   9   0   -.038   1.244  ?    .001   1.548  14.347  <  ?  ?  ?  ?
    1   9   1   -.173   4.407  ?    .030  19.420  12.555  <  ?  ?  ?  ?
    1   9   2  82.687  77.404  ? 6837.17 5991.34 335.898  o  ?  ?  ?  ?
    1   9   3   -.153   1.256  ?    .023   1.578  32.628  <  ?  ?  ?  ?
    1   9   4  18.161  19.097  ? 329.811 364.687  18.814  o  ?  ?  ?  ?
    1   9   5   1.332   5.616  ?   1.776  31.539  17.258  <  ?  ?  ?  ?
    1   9   6  74.213  72.320  ? 5507.56 5230.25 286.368  o  ?  ?  ?  ?
    1   9   7   -.099   1.227  ?    .010   1.506  26.334  <  ?  ?  ?  ?
    1   9   8  49.282  49.419  ? 2428.73 2442.19 134.733  o  ?  ?  ?  ?
    1   9   9   5.499   1.197  ?  30.236   1.434  26.965  <  ?  ?  ?  ?
    1   9  10  29.866  31.653  ? 891.950 1001.92  60.197  o  ?  ?  ?  ?
    1   9  11   5.245   4.699  ?  27.508  22.079  32.978  <  ?  ?  ?  ?
    1   9  12  43.182  42.830  ? 1864.72 1834.44 110.413  o  ?  ?  ?  ?
    1   9  13   4.774    .115  ?  22.789    .013  33.683  <  ?  ?  ?  ?
    1   9  14   9.043   8.821  ?  81.770  77.809  37.322  o  ?  ?  ?  ?
    1   9  15    .057   2.191  ?    .003   4.803  41.148  <  ?  ?  ?  ?
    1   9  16  39.009  36.724  ? 1521.74 1348.67 150.785  o  ?  ?  ?  ?
    1   9  17   3.250   1.144  ?  10.559   1.310  58.316  <  ?  ?  ?  ?
    1  10 -15   6.535   2.728  ?  42.701   7.441 149.288  <  ?  ?  ?  ?
    1  10 -14  31.638  32.828  ? 1000.98 1077.70  93.171  o  ?  ?  ?  ?
    1  10 -13   8.376  10.038  ?  70.157 100.757  41.148  <  ?  ?  ?  ?
    1  10 -12  15.130  16.132  ? 228.912 260.246  48.504  o  ?  ?  ?  ?
    1  10 -11   4.182    .687  ?  17.490    .472  34.396  <  ?  ?  ?  ?
    1  10 -10  33.267  33.584  ? 1106.68 1127.91  85.098  o  ?  ?  ?  ?
    1  10  -9  11.434  14.047  ? 130.730 197.309  41.148  o  ?  ?  ?  ?
    1  10  -8  40.027  42.018  ? 1602.13 1765.54 101.609  o  ?  ?  ?  ?
    1  10  -7   6.231   5.158  ?  38.819  26.604  26.334  <  ?  ?  ?  ?
    1  10  -6  33.537  34.286  ? 1124.76 1175.51  62.108  o  ?  ?  ?  ?
    1  10  -5   6.642  11.766  ?  44.110 138.438  27.603  <  ?  ?  ?  ?
    1  10  -4  62.987  62.292  ? 3967.41 3880.25 187.267  o  ?  ?  ?  ?
    1  10  -3   6.230   7.779  ?  38.819  60.510  22.707  <  ?  ?  ?  ?
    1  10  -2   5.729   6.929  ?  32.827  48.005  22.128  <  ?  ?  ?  ?
    1  10  -1   5.022   8.992  ?  25.223  80.859  22.707  <  ?  ?  ?  ?
    1  10   0  79.449  75.282  ? 6312.10 5667.34 254.241  o  ?  ?  ?  ?
    1  10   1  10.348   8.477  ? 107.072  71.862  24.487  o  ?  ?  ?  ?
    1  10   2   8.521   9.791  ?  72.610  95.868  32.280  <  ?  ?  ?  ?
    1  10   3   5.957   8.532  ?  35.490  72.799  21.557  <  ?  ?  ?  ?
    1  10   4  62.375  60.625  ? 3890.60 3675.44 459.811  o  ?  ?  ?  ?
    1  10   5   8.775  11.421  ?  76.996 130.437  28.902  o  ?  ?  ?  ?
    1  10   6  29.662  29.427  ? 879.837 865.928  57.386  o  ?  ?  ?  ?
    1  10   7   4.080   6.381  ?  16.647  40.714  27.603  <  ?  ?  ?  ?
    1  10   8  40.779  41.146  ? 1662.89 1692.96 112.996  o  ?  ?  ?  ?
    1  10   9   7.015   9.169  ?  49.208  84.077  35.844  <  ?  ?  ?  ?
    1  10  10  36.006  36.110  ? 1296.45 1303.93  91.995  o  ?  ?  ?  ?
    1  10  11   -.076   1.296  ?    .006   1.680  37.322  <  ?  ?  ?  ?
    1  10  12   9.963  12.882  ?  99.260 165.954  36.579  o  ?  ?  ?  ?
    1  10  13   7.033   9.604  ?  49.465  92.240  39.595  <  ?  ?  ?  ?
    1  10  14  29.545  29.371  ? 872.934 862.683  82.859  o  ?  ?  ?  ?
    1  10  15   2.179    .186  ?   4.750    .035 115.609  <  ?  ?  ?  ?
    1  11 -12  29.892  28.916  ? 893.552 836.107 155.319  o  ?  ?  ?  ?
    1  11 -11   9.764  11.819  ?  95.334 139.683  51.090  o  ?  ?  ?  ?
    1  11 -10  20.099  20.765  ? 403.951 431.179  55.550  o  ?  ?  ?  ?
    1  11  -9   4.764   4.110  ?  22.700  16.894  35.116  <  ?  ?  ?  ?
    1  11  -8  28.382  30.403  ? 805.549 924.342  75.256  o  ?  ?  ?  ?
    1  11  -7  11.109  14.865  ? 123.401 220.955  41.148  o  ?  ?  ?  ?
    1  11  -6  38.025  39.091  ? 1445.90 1528.07 139.021  o  ?  ?  ?  ?
    1  11  -5   8.927   9.091  ?  79.696  82.646  74.200  <  ?  ?  ?  ?
    1  11  -4  14.163  13.840  ? 200.587 191.542  88.513  o  ?  ?  ?  ?
    1  11  -3  19.654  20.304  ? 386.288 412.264  68.019  o  ?  ?  ?  ?
    1  11  -2  53.505  53.222  ? 2862.84 2832.61 237.010  o  ?  ?  ?  ?
    1  11  -1  13.658  14.951  ? 186.540 223.544  67.015  o  ?  ?  ?  ?
    1  11   0   -.027   1.531  ?    .001   2.343  47.656  <  ?  ?  ?  ?
    1  11   1  12.921  14.992  ? 166.962 224.749  66.019  o  ?  ?  ?  ?
    1  11   2  56.208  54.386  ? 3159.31 2957.86 258.153  o  ?  ?  ?  ?
    1  11   3  21.382  19.993  ? 457.170 399.720 122.271  o  ?  ?  ?  ?
    1  11   4  10.287  14.285  ? 105.830 204.059  94.354  <  ?  ?  ?  ?
    1  11   5  11.536  10.750  ? 133.075 115.559  40.367  o  ?  ?  ?  ?
    1  11   6  38.772  38.667  ? 1503.26 1495.13 104.087  o  ?  ?  ?  ?
    1  11   7  12.486  14.148  ? 155.893 200.158  41.148  o  ?  ?  ?  ?
    1  11   8  28.220  27.771  ? 796.353 771.226  72.110  o  ?  ?  ?  ?
    1  11   9   5.400   2.049  ?  29.161   4.199  35.844  <  ?  ?  ?  ?
    1  11  10  18.963  18.847  ? 359.612 355.198  58.316  o  ?  ?  ?  ?
    1  11  11  15.338  15.116  ? 235.253 228.479  55.550  o  ?  ?  ?  ?
    1  11  12  24.291  24.555  ? 590.072 602.960  96.742  o  ?  ?  ?  ?
    1  11  13   1.668   4.288  ?   2.782  18.383 141.917  <  ?  ?  ?  ?
    1  12 -10  21.024  21.811  ? 442.027 475.711  97.948  o  ?  ?  ?  ?
    1  12  -9  13.398  13.993  ? 179.505 195.813  78.470  o  ?  ?  ?  ?
    1  12  -8  16.317  17.788  ? 266.238 316.401  58.316  o  ?  ?  ?  ?
    1  12  -7   7.324    .321  ?  53.642    .103 102.845  <  ?  ?  ?  ?
    1  12  -6  15.932  16.631  ? 253.838 276.599 116.926  o  ?  ?  ?  ?
    1  12  -5  21.281  20.162  ? 452.890 406.519 133.318  o  ?  ?  ?  ?
    1  12  -4  33.340  31.439  ? 1111.58 988.427 204.360  o  ?  ?  ?  ?
    1  12  -3  14.566  15.250  ? 212.167 232.555 111.701  o  ?  ?  ?  ?
    1  12  -2   4.069   8.462  ?  16.554  71.599  66.019  <  ?  ?  ?  ?
    1  12  -1  16.253  16.845  ? 264.174 283.763  83.975  o  ?  ?  ?  ?
    1  12   0  38.416  35.885  ? 1475.79 1287.72 163.026  o  ?  ?  ?  ?
    1  12   1  19.996  20.095  ? 399.822 403.826  99.161  o  ?  ?  ?  ?
    1  12   2   3.998   4.562  ?  15.983  20.808 111.701  <  ?  ?  ?  ?
    1  12   3  10.710   9.715  ? 114.697  94.383 120.923  <  ?  ?  ?  ?
    1  12   4  29.984  29.121  ? 899.016 848.029 197.433  o  ?  ?  ?  ?
    1  12   5  21.821  21.226  ? 476.174 450.560 159.921  o  ?  ?  ?  ?
    1  12   6  14.078  13.408  ? 198.196 179.787 139.021  o  ?  ?  ?  ?
    1  12   7   5.922   3.290  ?  35.071  10.825 120.923  <  ?  ?  ?  ?
    1  12   8  15.075  17.424  ? 227.257 303.611 130.511  o  ?  ?  ?  ?
    1  12   9  13.225  15.864  ? 174.894 251.657 116.926  o  ?  ?  ?  ?
    1  12  10  26.093  23.026  ? 680.854 530.220 752.416  o  ?  ?  ?  ?
    1  13  -5    .252   5.720  ?    .064  32.720 260.120  <  ?  ?  ?  ?
    1  13  -4    .354   8.245  ?    .126  67.976 252.297  <  ?  ?  ?  ?
    1  13  -3  19.525  17.227  ? 381.241 296.761 174.130  o  ?  ?  ?  ?
    1  13  -2  22.912  19.947  ? 524.955 397.869 199.154  o  ?  ?  ?  ?
    1  13  -1  12.850  13.165  ? 165.131 173.305 152.289  o  ?  ?  ?  ?
    1  13   0   6.467    .902  ?  41.825    .814 140.465  <  ?  ?  ?  ?
    1  13   1  11.946  12.084  ? 142.714 146.014 153.800  <  ?  ?  ?  ?
    1  13   2  21.670  21.055  ? 469.604 443.300 342.650  o  ?  ?  ?  ?
    1  13   3  20.666  18.205  ? 427.095 331.418 342.650  o  ?  ?  ?  ?
    2   0 -22  37.980  35.328  ? 1442.49 1248.04 282.248  o  ?  ?  ?  ?
    2   0 -20  20.816  18.257  ? 433.308 333.310 150.785  o  ?  ?  ?  ?
    2   0 -18  81.345  75.185  ? 6616.97 5652.72 680.489  o  ?  ?  ?  ?
    2   0 -16    .065  10.140  ?    .004 102.813  61.148  <  ?  ?  ?  ?
    2   0 -14 127.482 116.649  ? 16251.7 13606.9 4548.87  o  ?  ?  ?  ?
    2   0 -12  60.630  61.051  ? 3676.02 3727.22 114.299  o  ?  ?  ?  ?
    2   0 -10 106.730 101.989  ? 11391.2 10401.7 320.406  o  ?  ?  ?  ?
    2   0  -8 115.948 117.073  ? 13443.9 13706.1 408.904  o  ?  ?  ?  ?
    2   0  -6  85.649  86.330  ? 7335.83 7452.88 218.573  o  ?  ?  ?  ?
    2   0  -4 286.294 291.273  ? 81964.5 84839.8 2870.55  o  ?  ?  ?  ?
    2   0  -2  52.353  52.925  ? 2740.85 2801.02  48.504  o  ?  ?  ?  ?
    2   0   0 368.073 381.615  ? 135477. 145630. 6974.33  o  ?  ?  ?  ?
    2   0   2  23.138  14.190  ? 535.352 201.369   8.244  o  ?  ?  ?  ?
    2   0   4 156.737 164.466  ? 24566.6 27049.0 1052.34  o  ?  ?  ?  ?
    2   0   6 147.049 153.484  ? 21623.3 23557.5 536.097  o  ?  ?  ?  ?
    2   0   8 155.251 149.814  ? 24103.0 22444.3 725.842  o  ?  ?  ?  ?
    2   0  10 146.198 139.361  ? 21373.9 19421.6 1060.28  o  ?  ?  ?  ?
    2   0  12  69.758  75.541  ? 4866.24 5706.50 195.720  o  ?  ?  ?  ?
    2   0  14  70.682  78.884  ? 4995.90 6222.67 256.193  o  ?  ?  ?  ?
    2   0  16  14.865  15.136  ? 220.955 229.092  97.948  o  ?  ?  ?  ?
    2   0  18  58.722  59.151  ? 3448.25 3498.85 457.195  o  ?  ?  ?  ?
    2   0  20  21.561  20.428  ? 464.858 417.307 170.920  o  ?  ?  ?  ?
    2   0  22  32.699  32.202  ? 1069.23 1036.97 280.199  o  ?  ?  ?  ?
    2   1 -23   6.978    .933  ?  48.689    .870  81.750  <  ?  ?  ?  ?
    2   1 -22  22.043  19.575  ? 485.911 383.200  94.354  o  ?  ?  ?  ?
    2   1 -21  13.378  11.965  ? 178.980 143.160  68.019  o  ?  ?  ?  ?
    2   1 -20  58.817  54.507  ? 3459.44 2971.06 294.698  o  ?  ?  ?  ?
    2   1 -19  12.790   7.208  ? 163.579  51.958  49.358  o  ?  ?  ?  ?
    2   1 -18  10.905  10.860  ? 118.913 117.933  44.342  o  ?  ?  ?  ?
    2   1 -17  22.887  23.455  ? 523.798 550.127  51.967  o  ?  ?  ?  ?
    2   1 -16  94.023  87.843  ? 8840.33 7716.44 408.904  o  ?  ?  ?  ?
    2   1 -15   5.549    .633  ?  30.787    .401  23.886  <  ?  ?  ?  ?
    2   1 -14   8.330   9.827  ?  69.388  96.578  16.754  o  ?  ?  ?  ?
    2   1 -13  26.456  25.815  ? 699.895 666.434  25.711  o  ?  ?  ?  ?
    2   1 -12 141.274 133.445  ? 19958.2 17807.6 699.747  o  ?  ?  ?  ?
    2   1 -11  31.434  29.350  ? 988.107 861.396  18.814  o  ?  ?  ?  ?
    2   1 -10  84.799  80.877  ? 7190.79 6541.07 182.284  o  ?  ?  ?  ?
    2   1  -9  11.619  12.190  ? 135.005 148.601   4.064  o  ?  ?  ?  ?
    2   1  -8 109.673 106.851  ? 12028.1 11417.1 264.076  o  ?  ?  ?  ?
    2   1  -7   9.699   2.817  ?  94.064   7.937   4.314  o  ?  ?  ?  ?
    2   1  -6 179.538 178.608  ? 32233.9 31900.8 762.504  o  ?  ?  ?  ?
    2   1  -5  51.282  52.626  ? 2629.85 2769.48  32.978  o  ?  ?  ?  ?
    2   1  -4  58.763  54.240  ? 3453.10 2941.97  26.334  o  ?  ?  ?  ?
    2   1  -3  23.984  26.810  ? 575.235 718.787   3.822  o  ?  ?  ?  ?
    2   1  -2 275.923 278.497  ? 76133.4 77560.3 1299.18  o  ?  ?  ?  ?
    2   1  -1 133.000 139.126  ? 17689.1 19355.9 305.279  o  ?  ?  ?  ?
    2   1   0  36.010  34.389  ? 1296.69 1182.58   6.901  o  ?  ?  ?  ?
    2   1   1  44.450  47.752  ? 1975.79 2280.26  11.290  o  ?  ?  ?  ?
    2   1   2 367.779 368.643  ? 135261. 135897. 4067.86  o  ?  ?  ?  ?
    2   1   3 237.168 240.509  ? 56248.6 57844.8 3482.73  o  ?  ?  ?  ?
    2   1   4  16.326  16.713  ? 266.550 279.338   3.587  o  ?  ?  ?  ?
    2   1   5   9.040   1.231  ?  81.721   1.516   2.523  o  ?  ?  ?  ?
    2   1   6 180.709 181.960  ? 32655.6 33109.4 1660.42  o  ?  ?  ?  ?
    2   1   7  49.232  51.340  ? 2423.74 2635.79  33.683  o  ?  ?  ?  ?
    2   1   8 114.510 113.494  ? 13112.4 12880.9 386.970  o  ?  ?  ?  ?
    2   1   9   5.984   2.364  ?  35.814   5.590   4.572  o  ?  ?  ?  ?
    2   1  10 108.895 105.533  ? 11858.1 11137.3 216.770  o  ?  ?  ?  ?
    2   1  11   4.814   2.656  ?  23.177   7.054   7.226  o  ?  ?  ?  ?
    2   1  12 107.650 109.213  ? 11588.6 11927.4 231.400  o  ?  ?  ?  ?
    2   1  13  23.176  23.146  ? 537.146 535.736  20.994  o  ?  ?  ?  ?
    2   1  14  21.353  22.876  ? 455.945 523.305  31.589  o  ?  ?  ?  ?
    2   1  15   5.510    .525  ?  30.359    .275  22.128  <  ?  ?  ?  ?
    2   1  16  80.528  82.052  ? 6484.69 6732.57 342.650  o  ?  ?  ?  ?
    2   1  17  15.580  16.423  ? 242.734 269.717  37.322  o  ?  ?  ?  ?
    2   1  18  17.652  17.090  ? 311.580 292.074  58.316  o  ?  ?  ?  ?
    2   1  19    .231   2.904  ?    .053   8.431  50.221  <  ?  ?  ?  ?
    2   1  20  41.531  43.089  ? 1724.82 1856.62 200.882  o  ?  ?  ?  ?
    2   1  21   8.269   9.445  ?  68.382  89.211  71.076  <  ?  ?  ?  ?
    2   1  22  21.212  21.820  ? 449.942 476.100 107.861  o  ?  ?  ?  ?
    2   2 -23  10.927  12.448  ? 119.400 154.945 131.911  <  ?  ?  ?  ?
    2   2 -22  26.338  26.142  ? 693.682 683.423 105.338  o  ?  ?  ?  ?
    2   2 -21    .186   1.212  ?    .034   1.470  52.852  <  ?  ?  ?  ?
    2   2 -20  20.163  18.623  ? 406.557 346.807  73.151  o  ?  ?  ?  ?
    2   2 -19  23.365  20.816  ? 545.945 433.310  71.076  o  ?  ?  ?  ?
    2   2 -18  69.600  62.257  ? 4844.16 3876.00 462.435  o  ?  ?  ?  ?
    2   2 -17   9.140  10.692  ?  83.539 114.329  35.116  o  ?  ?  ?  ?
    2   2 -16   4.673  11.788  ?  21.832 138.952  26.334  <  ?  ?  ?  ?
    2   2 -15  23.076  20.752  ? 532.480 430.642  43.532  o  ?  ?  ?  ?
    2   2 -14  94.838  86.130  ? 8994.25 7418.42 439.090  o  ?  ?  ?  ?
    2   2 -13  26.409  28.615  ? 697.419 818.840  32.280  o  ?  ?  ?  ?
    2   2 -12  41.514  38.787  ? 1723.44 1504.43  54.643  o  ?  ?  ?  ?
    2   2 -11  23.124  24.729  ? 534.733 611.504  11.290  o  ?  ?  ?  ?
    2   2  -9  16.204  17.291  ? 262.556 298.973   6.584  o  ?  ?  ?  ?
    2   2  -8 141.094 138.682  ? 19907.4 19232.8 351.756  o  ?  ?  ?  ?
    2   2  -7  62.063  57.775  ? 3851.78 3337.97  62.108  o  ?  ?  ?  ?
    2   2  -6 173.407 168.794  ? 30069.9 28491.4 576.435  o  ?  ?  ?  ?
    2   2  -5  46.871  46.868  ? 2196.87 2196.63  20.994  o  ?  ?  ?  ?
    2   2  -4 225.732 224.398  ? 50955.0 50354.5 933.051  o  ?  ?  ?  ?
    2   2  -3  58.601  63.642  ? 3434.04 4050.24  61.148  o  ?  ?  ?  ?
    2   2  -2  67.571  66.960  ? 4565.85 4483.71  45.984  o  ?  ?  ?  ?
    2   2  -1 125.383 129.642  ? 15720.9 16807.0 231.400  o  ?  ?  ?  ?
    2   2   0 146.196 144.713  ? 21373.4 20941.8 307.418  o  ?  ?  ?  ?
    2   2   1  29.266  32.439  ? 856.498 1052.26   5.972  o  ?  ?  ?  ?
    2   2   2  91.129  91.856  ? 8304.48 8437.48  65.030  o  ?  ?  ?  ?
    2   2   3  52.166  50.592  ? 2721.25 2559.56  18.288  o  ?  ?  ?  ?
    2   2   4 256.913 246.723  ? 66004.3 60872.3 810.470  o  ?  ?  ?  ?
    2   2   5  76.150  78.551  ? 5798.88 6170.33  47.656  o  ?  ?  ?  ?
    2   2   6 101.470 102.227  ? 10296.2 10450.4 161.470  o  ?  ?  ?  ?
    2   2   7  24.876  27.465  ? 618.794 754.312   9.331  o  ?  ?  ?  ?
    2   2   8 121.871 118.878  ? 14852.6 14132.1 242.686  o  ?  ?  ?  ?
    2   2   9  89.191  82.001  ? 7954.96 6724.23 156.846  o  ?  ?  ?  ?
    2   2  10 118.022 122.513  ? 13929.2 15009.5 207.869  o  ?  ?  ?  ?
    2   2  11   4.765   2.683  ?  22.701   7.199   7.226  <  ?  ?  ?  ?
    2   2  12  64.470  60.074  ? 4156.34 3608.94 156.846  o  ?  ?  ?  ?
    2   2  13  24.059  27.622  ? 578.829 762.968  23.293  o  ?  ?  ?  ?
    2   2  14 109.790 105.228  ? 12053.9 11072.9 624.327  o  ?  ?  ?  ?
    2   2  15  16.165  19.086  ? 261.308 364.262  28.902  o  ?  ?  ?  ?
    2   2  16   4.283   1.782  ?  18.346   3.176  23.886  <  ?  ?  ?  ?
    2   2  17  10.002  13.499  ? 100.050 182.228  31.589  o  ?  ?  ?  ?
    2   2  18  56.066  58.094  ? 3143.39 3374.92 155.319  o  ?  ?  ?  ?
    2   2  19  21.894  20.992  ? 479.368 440.646  68.019  o  ?  ?  ?  ?
    2   2  20   9.932  11.782  ?  98.647 138.808  59.252  o  ?  ?  ?  ?
    2   2  21   4.194   9.383  ?  17.592  88.050  65.030  <  ?  ?  ?  ?
    2   2  22  26.941  29.127  ? 725.809 848.390 111.701  o  ?  ?  ?  ?
    2   3 -22  17.929  17.780  ? 321.464 316.144  95.544  o  ?  ?  ?  ?
    2   3 -21  19.416  19.476  ? 376.992 379.333  99.161  o  ?  ?  ?  ?
    2   3 -20  30.843  32.684  ? 951.312 1068.24 118.251  o  ?  ?  ?  ?
    2   3 -19  10.297  14.014  ? 106.032 196.401  51.967  o  ?  ?  ?  ?
    2   3 -18  16.832  17.952  ? 283.306 322.275  49.358  o  ?  ?  ?  ?
    2   3 -17  15.188  16.009  ? 230.687 256.278  39.595  o  ?  ?  ?  ?
    2   3 -16  60.056  54.144  ? 3606.73 2931.61 256.193  o  ?  ?  ?  ?
    2   3 -15  41.202  37.263  ? 1697.62 1388.52  78.470  o  ?  ?  ?  ?
    2   3 -14  39.627  35.431  ? 1570.27 1255.33  56.464  o  ?  ?  ?  ?
    2   3 -13  47.996  46.158  ? 2303.61 2130.58  73.151  o  ?  ?  ?  ?
    2   3 -12  96.715  93.329  ? 9353.85 8710.36 342.650  o  ?  ?  ?  ?
    2   3 -11  52.777  54.502  ? 2785.36 2970.48  68.019  o  ?  ?  ?  ?
    2   3 -10  64.301  66.611  ? 4134.61 4437.00  58.316  o  ?  ?  ?  ?
    2   3  -9  16.273  18.282  ? 264.820 334.239   5.677  o  ?  ?  ?  ?
    2   3  -8 112.284 111.191  ? 12607.8 12363.5 224.025  o  ?  ?  ?  ?
    2   3  -7  61.332  66.000  ? 3761.60 4356.00  44.342  o  ?  ?  ?  ?
    2   3  -6 141.680 142.783  ? 20073.2 20386.9 391.792  o  ?  ?  ?  ?
    2   3  -5 102.335 102.912  ? 10472.4 10590.8 206.111  o  ?  ?  ?  ?
    2   3  -4 104.212 109.965  ? 10860.2 12092.3 185.599  o  ?  ?  ?  ?
    2   3  -3  88.101  86.515  ? 7761.78 7484.92 123.625  o  ?  ?  ?  ?
    2   3  -2 166.521 162.060  ? 27729.2 26263.4 431.443  o  ?  ?  ?  ?
    2   3  -1  15.351   7.613  ? 235.639  57.955   2.150  o  ?  ?  ?  ?
    2   3   0  36.358  34.144  ? 1321.94 1165.84  15.769  o  ?  ?  ?  ?
    2   3   1 175.597 170.223  ? 30834.3 28975.9 524.841  o  ?  ?  ?  ?
    2   3   2 144.340 138.292  ? 20833.9 19124.8 313.878  o  ?  ?  ?  ?
    2   3   3 107.219 106.309  ? 11495.8 11301.6 144.843  o  ?  ?  ?  ?
    2   3   4  88.799  87.484  ? 7885.25 7653.47  56.464  o  ?  ?  ?  ?
    2   3   5   2.792    .314  ?   7.796    .099   2.926  o  ?  ?  ?  ?
    2   3   6 104.256 102.203  ? 10869.2 10445.5 131.911  o  ?  ?  ?  ?
    2   3   7  85.088  84.172  ? 7239.93 7084.98 213.187  o  ?  ?  ?  ?
    2   3   8 118.889 124.913  ? 14134.5 15603.4 264.076  o  ?  ?  ?  ?
    2   3   9   8.987   8.561  ?  80.762  73.291   8.961  o  ?  ?  ?  ?
    2   3  10  58.196  59.470  ? 3386.79 3536.73  74.200  o  ?  ?  ?  ?
    2   3  11  77.076  77.107  ? 5940.72 5945.56 180.639  o  ?  ?  ?  ?
    2   3  12 114.469 115.695  ? 13103.2 13385.3 462.435  o  ?  ?  ?  ?
    2   3  13  11.833  15.053  ? 140.023 226.580  15.769  o  ?  ?  ?  ?
    2   3  14  25.091  25.578  ? 629.552 654.224  27.603  o  ?  ?  ?  ?
    2   3  15  38.225  38.463  ? 1461.15 1479.40  72.110  o  ?  ?  ?  ?
    2   3  16  66.951  66.518  ? 4482.42 4424.65 298.908  o  ?  ?  ?  ?
    2   3  17  25.642  28.399  ? 657.510 806.516  50.221  o  ?  ?  ?  ?
    2   3  18    .408   1.548  ?    .167   2.395  29.563  <  ?  ?  ?  ?
    2   3  20  33.318  36.672  ? 1110.08 1344.82  94.354  o  ?  ?  ?  ?
    2   3  21  18.205  20.573  ? 331.426 423.257  76.320  o  ?  ?  ?  ?
    2   3  22   9.842  10.131  ?  96.872 102.644 130.511  <  ?  ?  ?  ?
    2   4 -22  20.899  19.582  ? 436.749 383.468 426.382  o  ?  ?  ?  ?
    2   4 -21   7.733   7.458  ?  59.801  55.620  47.656  <  ?  ?  ?  ?
    2   4 -20  12.143  11.999  ? 147.451 143.968  45.160  o  ?  ?  ?  ?
    2   4 -19  18.460  21.134  ? 340.783 446.631  47.656  o  ?  ?  ?  ?
    2   4 -18  40.870  40.373  ? 1670.38 1630.00 149.288  o  ?  ?  ?  ?
    2   4 -17  38.678  38.730  ? 1495.95 1500.04 127.735  o  ?  ?  ?  ?
    2   4 -16   2.787    .747  ?   7.768    .559  17.769  <  ?  ?  ?  ?
    2   4 -15  31.744  34.118  ? 1007.71 1164.04  35.844  o  ?  ?  ?  ?
    2   4 -14  64.935  66.047  ? 4216.56 4362.16 114.299  o  ?  ?  ?  ?
    2   4 -13  66.745  63.901  ? 4454.88 4083.36 131.911  o  ?  ?  ?  ?
    2   4 -12  37.225  38.849  ? 1385.67 1509.23  32.280  o  ?  ?  ?  ?
    2   4 -11  25.842  25.952  ? 667.791 673.499  18.814  o  ?  ?  ?  ?
    2   4 -10  93.070  91.361  ? 8662.05 8346.85 177.369  o  ?  ?  ?  ?
    2   4  -9 104.733 106.601  ? 10969.1 11363.8 235.132  o  ?  ?  ?  ?
    2   4  -8  72.642  76.084  ? 5276.88 5788.78  88.513  o  ?  ?  ?  ?
    2   4  -7  27.924  28.699  ? 779.773 823.619  11.704  o  ?  ?  ?  ?
    2   4  -6  59.374  59.666  ? 3525.25 3560.05  50.221  o  ?  ?  ?  ?
    2   4  -5 124.006 127.559  ? 15377.4 16271.2 254.241  o  ?  ?  ?  ?
    2   4  -4 105.351 106.372  ? 11098.8 11315.1 131.911  o  ?  ?  ?  ?
    2   4  -3  12.096   9.545  ? 146.323  91.106   3.359  o  ?  ?  ?  ?
    2   4  -2  22.124  20.560  ? 489.476 422.700   5.389  o  ?  ?  ?  ?
    2   4  -1 133.189 124.374  ? 17739.3 15469.0 324.795  o  ?  ?  ?  ?
    2   4   0 166.967 163.806  ? 27877.9 26832.3 386.970  o  ?  ?  ?  ?
    2   4   1  73.858  71.449  ? 5454.96 5104.91  50.221  o  ?  ?  ?  ?
    2   4   2  47.439  49.567  ? 2250.50 2456.89  24.487  o  ?  ?  ?  ?
    2   4   3  43.630  42.388  ? 1903.55 1796.70  20.994  o  ?  ?  ?  ?
    2   4   4 132.898 133.376  ? 17662.0 17789.2 423.862  o  ?  ?  ?  ?
    2   4   5 125.651 124.154  ? 15788.2 15414.3 264.076  o  ?  ?  ?  ?
    2   4   6  55.648  55.847  ? 3096.66 3118.87  29.563  o  ?  ?  ?  ?
    2   4   7   3.086   1.903  ?   9.524   3.622   5.677  <  ?  ?  ?  ?
    2   4   8  72.541  72.969  ? 5262.25 5324.51 123.625  o  ?  ?  ?  ?
    2   4   9 105.650 107.409  ? 11162.0 11536.7 342.650  o  ?  ?  ?  ?
    2   4  10 103.479 100.925  ? 10708.0 10185.8 235.132  o  ?  ?  ?  ?
    2   4  11   7.212  10.123  ?  52.020 102.476  12.555  o  ?  ?  ?  ?
    2   4  12  34.076  37.593  ? 1161.19 1413.21  35.116  o  ?  ?  ?  ?
    2   4  13  59.065  58.530  ? 3488.63 3425.75 147.799  o  ?  ?  ?  ?
    2   4  14  66.790  67.636  ? 4460.93 4574.59 182.284  o  ?  ?  ?  ?
    2   4  15  30.568  32.529  ? 934.420 1058.12  57.386  o  ?  ?  ?  ?
    2   4  16   3.848   3.830  ?  14.808  14.670  26.334  <  ?  ?  ?  ?
    2   4  17  28.990  32.277  ? 840.418 1041.78  66.019  o  ?  ?  ?  ?
    2   4  18  41.746  42.346  ? 1742.76 1793.15 118.251  o  ?  ?  ?  ?
    2   4  19  22.048  25.517  ? 486.115 651.115  54.643  o  ?  ?  ?  ?
    2   4  20  12.764  13.986  ? 162.913 195.620  48.504  o  ?  ?  ?  ?
    2   4  21   6.904   6.520  ?  47.668  42.509  47.656  <  ?  ?  ?  ?
    2   4  22  22.701  21.064  ? 515.351 443.675 408.904  o  ?  ?  ?  ?
    2   5 -22   9.736   9.385  ?  94.791  88.080 356.354  <  ?  ?  ?  ?
    2   5 -21  23.746  24.968  ? 563.860 623.387  85.098  o  ?  ?  ?  ?
    2   5 -20  25.323  24.018  ? 641.245 576.841  71.076  o  ?  ?  ?  ?
    2   5 -19  13.587  15.691  ? 184.612 246.208  42.730  o  ?  ?  ?  ?
    2   5 -18   9.942   8.306  ?  98.844  68.992  55.550  o  ?  ?  ?  ?
    2   5 -17  25.910  27.959  ? 671.341 781.684  51.967  o  ?  ?  ?  ?
    2   5 -16  47.177  46.649  ? 2225.64 2176.14  82.859  o  ?  ?  ?  ?
    2   5 -15  49.378  51.551  ? 2438.24 2657.55  81.750  o  ?  ?  ?  ?
    2   5 -14  10.202  13.356  ? 104.088 178.377  19.348  o  ?  ?  ?  ?
    2   5 -13  30.874  31.064  ? 953.190 964.966  43.532  o  ?  ?  ?  ?
    2   5 -12  49.394  54.358  ? 2439.73 2954.74  75.256  o  ?  ?  ?  ?
    2   5 -11  97.441  97.063  ? 9494.72 9421.30 401.525  o  ?  ?  ?  ?
    2   5 -10  31.198  32.398  ? 973.324 1049.64  26.965  o  ?  ?  ?  ?
    2   5  -9   6.938   6.365  ?  48.129  40.508   7.897  o  ?  ?  ?  ?
    2   5  -8  66.941  66.595  ? 4481.15 4434.92  85.098  o  ?  ?  ?  ?
    2   5  -7 130.260 128.623  ? 16967.7 16543.8 918.181  o  ?  ?  ?  ?
    2   5  -6  79.191  77.645  ? 6271.20 6028.68 130.511  o  ?  ?  ?  ?
    2   5  -5  15.719  16.334  ? 247.082 266.804   4.837  o  ?  ?  ?  ?
    2   5  -4  49.806  49.020  ? 2480.60 2402.94  21.557  o  ?  ?  ?  ?
    2   5  -3 125.382 124.896  ? 15720.6 15599.1 229.545  o  ?  ?  ?  ?
    2   5  -2 126.069 127.504  ? 15893.4 16257.2 316.047  o  ?  ?  ?  ?
    2   5  -1  57.866  57.266  ? 3348.52 3279.39  35.844  o  ?  ?  ?  ?
    2   5   0  19.220  18.698  ? 369.421 349.613   7.226  o  ?  ?  ?  ?
    2   5   1  88.812  85.824  ? 7887.57 7365.74 119.583  o  ?  ?  ?  ?
    2   5   2 129.621 126.787  ? 16801.6 16075.0 231.400  o  ?  ?  ?  ?
    2   5   3 109.230 110.288  ? 11931.2 12163.4 192.317  o  ?  ?  ?  ?
    2   5   4  14.680  12.329  ? 215.509 152.014   7.897  o  ?  ?  ?  ?
    2   5   5  23.957  24.146  ? 573.922 583.031  12.126  o  ?  ?  ?  ?
    2   5   6  91.218  91.918  ? 8320.70 8448.89 146.317  o  ?  ?  ?  ?
    2   5   7 117.750 114.008  ? 13865.1 12997.8 386.970  o  ?  ?  ?  ?
    2   5   8  60.918  56.954  ? 3710.99 3243.79  80.649  o  ?  ?  ?  ?
    2   5   9   6.315   1.388  ?  39.879   1.926  11.704  o  ?  ?  ?  ?
    2   5  10  54.769  53.316  ? 2999.66 2842.58  83.975  o  ?  ?  ?  ?
    2   5  11  76.375  71.736  ? 5833.15 5146.02 244.594  o  ?  ?  ?  ?
    2   5  12  53.200  54.545  ? 2830.29 2975.10  81.750  o  ?  ?  ?  ?
    2   5  13  29.179  31.357  ? 851.405 983.290  33.683  o  ?  ?  ?  ?
    2   5  14    .400   2.136  ?    .160   4.564  16.754  <  ?  ?  ?  ?
    2   5  15  45.551  46.777  ? 2074.85 2188.07 105.338  o  ?  ?  ?  ?
    2   5  16  40.576  42.106  ? 1646.38 1772.89  93.171  o  ?  ?  ?  ?
    2   5  17  27.947  31.572  ? 781.039 996.780  60.197  o  ?  ?  ?  ?
    2   5  18   2.798   5.862  ?   7.830  34.360  36.579  <  ?  ?  ?  ?
    2   5  19  22.815  22.284  ? 520.536 496.593  61.148  o  ?  ?  ?  ?
    2   5  20  20.470  21.039  ? 419.038 442.630  58.316  o  ?  ?  ?  ?
    2   5  21  16.595  17.966  ? 275.397 322.763 111.701  o  ?  ?  ?  ?
    2   5  22  15.707  13.615  ? 246.702 185.373 349.468  o  ?  ?  ?  ?
    2   6 -21    .342   9.479  ?    .117  89.859 333.663  <  ?  ?  ?  ?
    2   6 -20   5.398   7.462  ?  29.143  55.684  49.358  <  ?  ?  ?  ?
    2   6 -19  32.929  31.481  ? 1084.34 991.071 195.720  o  ?  ?  ?  ?
    2   6 -18  24.606  22.903  ? 605.437 524.547  74.200  o  ?  ?  ?  ?
    2   6 -17  25.881  25.103  ? 669.804 630.142  50.221  o  ?  ?  ?  ?
    2   6 -16   5.023   3.519  ?  25.236  12.383  22.128  <  ?  ?  ?  ?
    2   6 -15  36.428  37.326  ? 1327.00 1393.20  64.048  o  ?  ?  ?  ?
    2   6 -14  32.592  31.668  ? 1062.24 1002.87  50.221  o  ?  ?  ?  ?
    2   6 -13  57.720  61.552  ? 3331.65 3788.61 112.996  o  ?  ?  ?  ?
    2   6 -12  11.961  15.224  ? 143.076 231.766  19.889  o  ?  ?  ?  ?
    2   6 -11  25.897  30.110  ? 670.656 906.642  30.906  o  ?  ?  ?  ?
    2   6 -10  29.372  34.428  ? 862.728 1185.27  34.396  o  ?  ?  ?  ?
    2   6  -9 103.041 107.059  ? 10617.4 11461.7 428.908  o  ?  ?  ?  ?
    2   6  -8  40.803  44.465  ? 1664.92 1977.10  52.852  o  ?  ?  ?  ?
    2   6  -7  19.122  22.687  ? 365.668 514.705  17.258  o  ?  ?  ?  ?
    2   6  -6  24.006  27.182  ? 576.271 738.881  20.994  o  ?  ?  ?  ?
    2   6  -5 122.021 118.214  ? 14889.2 13974.6 386.970  o  ?  ?  ?  ?
    2   6  -4  62.715  65.278  ? 3933.14 4261.26  42.730  o  ?  ?  ?  ?
    2   6  -3  54.978  54.383  ? 3022.54 2957.49  35.844  o  ?  ?  ?  ?
    2   6  -2    .602   4.058  ?    .362  16.469   4.064  <  ?  ?  ?  ?
    2   6  -1 117.275 115.318  ? 13753.3 13298.3 305.279  o  ?  ?  ?  ?
    2   6   0  86.261  86.793  ? 7441.03 7533.03 144.843  o  ?  ?  ?  ?
    2   6   1 108.690 105.228  ? 11813.5 11072.9 238.895  o  ?  ?  ?  ?
    2   6   2  13.195  13.526  ? 174.116 182.957   9.707  o  ?  ?  ?  ?
    2   6   3  67.966  68.451  ? 4619.44 4685.52  89.666  o  ?  ?  ?  ?
    2   6   4  77.988  73.156  ? 6082.20 5351.80 115.609  o  ?  ?  ?  ?
    2   6   5 141.114 136.417  ? 19913.3 18609.5 645.880  o  ?  ?  ?  ?
    2   6   6   9.374   9.288  ?  87.863  86.266  12.555  o  ?  ?  ?  ?
    2   6   7  14.072  14.075  ? 198.008 198.106  15.287  o  ?  ?  ?  ?
    2   6   8  44.832  47.649  ? 2009.94 2270.38  59.252  o  ?  ?  ?  ?
    2   6   9  91.563  86.347  ? 8383.83 7455.76 360.982  o  ?  ?  ?  ?
    2   6  10  21.538  22.394  ? 463.888 501.475  26.334  o  ?  ?  ?  ?
    2   6  11  17.936  20.605  ? 321.701 424.546  23.886  o  ?  ?  ?  ?
    2   6  12    .584   1.709  ?    .341   2.920  15.769  <  ?  ?  ?  ?
    2   6  13  58.227  55.785  ? 3390.43 3111.91 116.926  o  ?  ?  ?  ?
    2   6  14  27.073  24.799  ? 732.963 614.982  31.589  o  ?  ?  ?  ?
    2   6  15  34.240  34.346  ? 1172.37 1179.67  48.504  o  ?  ?  ?  ?
    2   6  16   4.920   3.196  ?  24.203  10.213  22.707  <  ?  ?  ?  ?
    2   6  17  30.672  29.586  ? 940.780 875.319  59.252  o  ?  ?  ?  ?
    2   6  18  22.574  22.800  ? 509.592 519.818  49.358  o  ?  ?  ?  ?
    2   6  19  28.597  29.453  ? 817.765 867.472  66.019  o  ?  ?  ?  ?
    2   6  20   2.972   4.330  ?   8.831  18.748  39.595  <  ?  ?  ?  ?
    2   6  21  11.612   7.979  ? 134.838  63.672 318.223  <  ?  ?  ?  ?
    2   7 -19  13.125  12.384  ? 172.257 153.372 110.413  o  ?  ?  ?  ?
    2   7 -18   8.207   6.501  ?  67.351  42.259  50.221  <  ?  ?  ?  ?
    2   7 -17  34.551  34.195  ? 1193.79 1169.29  78.470  o  ?  ?  ?  ?
    2   7 -16  14.296  15.768  ? 204.385 248.639  28.902  o  ?  ?  ?  ?
    2   7 -15  42.619  42.106  ? 1816.37 1772.89  87.367  o  ?  ?  ?  ?
    2   7 -14   6.762   1.768  ?  45.720   3.126  20.438  <  ?  ?  ?  ?
    2   7 -13  30.794  32.923  ? 948.294 1083.93  47.656  o  ?  ?  ?  ?
    2   7 -12  22.614  22.976  ? 511.409 527.910  34.396  o  ?  ?  ?  ?
    2   7 -11  67.509  72.863  ? 4557.44 5309.04 199.154  o  ?  ?  ?  ?
    2   7 -10  12.819  13.010  ? 164.334 169.250  18.814  o  ?  ?  ?  ?
    2   7  -9  11.736  14.939  ? 137.722 223.187  16.257  o  ?  ?  ?  ?
    2   7  -8  20.529  23.692  ? 421.431 561.307  26.334  o  ?  ?  ?  ?
    2   7  -7  77.800  80.823  ? 6052.79 6532.31 163.026  o  ?  ?  ?  ?
    2   7  -6  40.358  42.423  ? 1628.74 1799.75  53.744  o  ?  ?  ?  ?
    2   7  -5  51.033  51.549  ? 2604.35 2657.31  51.090  o  ?  ?  ?  ?
    2   7  -4  17.732  18.033  ? 314.429 325.198  14.347  o  ?  ?  ?  ?
    2   7  -3 106.176 108.621  ? 11273.2 11798.5 200.882  o  ?  ?  ?  ?
    2   7  -2  33.108  33.623  ? 1096.12 1130.49  20.438  o  ?  ?  ?  ?
    2   7  -1 108.441 103.739  ? 11759.5 10761.8 272.078  o  ?  ?  ?  ?
    2   7   0    .047    .100  ?    .002    .010   8.244  <  ?  ?  ?  ?
    2   7   1  76.490  73.169  ? 5850.79 5353.64 163.026  o  ?  ?  ?  ?
    2   7   2  44.084  45.244  ? 1943.42 2046.99  38.072  o  ?  ?  ?  ?
    2   7   3 114.513 107.113  ? 13113.3 11473.3 370.328  o  ?  ?  ?  ?
    2   7   4  12.236  12.989  ? 149.713 168.717  12.992  o  ?  ?  ?  ?
    2   7   5  44.241  41.889  ? 1957.29 1754.66  43.532  o  ?  ?  ?  ?
    2   7   6  27.463  27.306  ? 754.208 745.599  30.906  o  ?  ?  ?  ?
    2   7   7 108.932 105.547  ? 11866.3 11140.2 755.771  o  ?  ?  ?  ?
    2   7   8  16.882  15.021  ? 284.995 225.618  23.886  o  ?  ?  ?  ?
    2   7   9   8.860  13.534  ?  78.497 183.166  18.288  o  ?  ?  ?  ?
    2   7  10  10.368  10.371  ? 107.502 107.549  18.814  o  ?  ?  ?  ?
    2   7  11  70.467  69.232  ? 4965.54 4793.08 194.015  o  ?  ?  ?  ?
    2   7  12  12.684  12.466  ? 160.880 155.404  26.965  o  ?  ?  ?  ?
    2   7  13  26.268  27.110  ? 689.998 734.948  45.984  o  ?  ?  ?  ?
    2   7  14   1.830    .499  ?   3.348    .249  22.707  <  ?  ?  ?  ?
    2   7  15  39.398  38.236  ? 1552.18 1462.01  69.031  o  ?  ?  ?  ?
    2   7  16  12.806  12.404  ? 163.984 153.864  32.280  o  ?  ?  ?  ?
    2   7  17  30.964  31.420  ? 958.757 987.190  65.030  o  ?  ?  ?  ?
    2   7  18    .108   1.314  ?    .012   1.726  38.072  <  ?  ?  ?  ?
    2   7  19   9.881  13.628  ?  97.639 185.725  54.643  o  ?  ?  ?  ?
    2   8 -19  20.264  25.653  ? 410.642 658.064 213.187  o  ?  ?  ?  ?
    2   8 -18    .190    .760  ?    .036    .577 141.917  <  ?  ?  ?  ?
    2   8 -17  17.331  19.299  ? 300.366 372.447  87.367  o  ?  ?  ?  ?
    2   8 -16   -.077   1.970  ?    .006   3.883  35.116  <  ?  ?  ?  ?
    2   8 -15  27.659  30.414  ? 765.039 925.026  67.015  o  ?  ?  ?  ?
    2   8 -14  10.019  11.474  ? 100.372 131.652  32.280  o  ?  ?  ?  ?
    2   8 -13  44.180  46.247  ? 1951.91 2138.83  99.161  o  ?  ?  ?  ?
    2   8 -12   1.726   1.153  ?   2.981   1.329  17.258  <  ?  ?  ?  ?
    2   8 -11  17.720  17.865  ? 314.013 319.170  26.965  o  ?  ?  ?  ?
    2   8 -10  15.349  16.534  ? 235.577 273.362  34.396  o  ?  ?  ?  ?
    2   8  -9  59.596  62.008  ? 3551.65 3844.96 139.021  o  ?  ?  ?  ?
    2   8  -8   5.621   9.242  ?  31.595  85.407  18.288  <  ?  ?  ?  ?
    2   8  -7  12.915  13.204  ? 166.801 174.353  20.438  o  ?  ?  ?  ?
    2   8  -6   5.750   5.812  ?  33.060  33.780  14.347  <  ?  ?  ?  ?
    2   8  -5  81.091  79.750  ? 6575.82 6360.02 166.161  o  ?  ?  ?  ?
    2   8  -4  20.001  19.021  ? 400.032 361.800  18.288  o  ?  ?  ?  ?
    2   8  -3  60.306  59.352  ? 3636.84 3522.65  78.470  o  ?  ?  ?  ?
    2   8  -2  19.253  18.943  ? 370.677 358.845  16.754  o  ?  ?  ?  ?
    2   8  -1  77.444  74.287  ? 5997.50 5518.60 183.938  o  ?  ?  ?  ?
    2   8   0    .528   9.046  ?    .279  81.827  11.290  <  ?  ?  ?  ?
    2   8   1  81.390  78.455  ? 6624.31 6155.12 225.858  o  ?  ?  ?  ?
    2   8   2   4.222    .175  ?  17.822    .031  10.883  <  ?  ?  ?  ?
    2   8   3  57.575  56.835  ? 3314.85 3230.21  96.742  o  ?  ?  ?  ?
    2   8   4    .468   9.255  ?    .219  85.658  12.555  <  ?  ?  ?  ?
    2   8   5  99.907  95.617  ? 9981.45 9142.57 547.473  o  ?  ?  ?  ?
    2   8   6  10.723   9.567  ? 114.972  91.518  20.438  o  ?  ?  ?  ?
    2   8   7  14.043  13.111  ? 197.197 171.897  19.348  o  ?  ?  ?  ?
    2   8   8   6.865   9.247  ?  47.126  85.509  19.348  <  ?  ?  ?  ?
    2   8   9  70.329  67.501  ? 4946.17 4556.43 207.869  o  ?  ?  ?  ?
    2   8  10  15.091  15.701  ? 227.740 246.533  28.249  o  ?  ?  ?  ?
    2   8  11  14.908  15.827  ? 222.242 250.509  28.902  o  ?  ?  ?  ?
    2   8  12   6.407   5.832  ?  41.045  34.016  24.487  <  ?  ?  ?  ?
    2   8  13  49.318  46.998  ? 2432.28 2208.78 124.988  o  ?  ?  ?  ?
    2   8  14   5.466   4.545  ?  29.880  20.658  31.589  <  ?  ?  ?  ?
    2   8  15  26.520  26.909  ? 703.301 724.107  56.464  o  ?  ?  ?  ?
    2   8  16   -.055    .592  ?    .003    .350  34.396  <  ?  ?  ?  ?
    2   8  17  25.185  25.504  ? 634.278 650.457  65.030  o  ?  ?  ?  ?
    2   8  18   8.464   4.669  ?  71.639  21.797  81.750  <  ?  ?  ?  ?
    2   9 -17  21.385  25.114  ? 457.327 630.736 206.111  o  ?  ?  ?  ?
    2   9 -16   6.360   5.414  ?  40.453  29.307  44.342  <  ?  ?  ?  ?
    2   9 -15  23.962  25.405  ? 574.182 645.405  64.048  o  ?  ?  ?  ?
    2   9 -14   5.557    .192  ?  30.880    .037  32.978  <  ?  ?  ?  ?
    2   9 -13  14.398  17.520  ? 207.295 306.959  38.072  o  ?  ?  ?  ?
    2   9 -12   2.337   1.114  ?   5.462   1.242  27.603  <  ?  ?  ?  ?
    2   9 -11  47.459  49.333  ? 2252.31 2433.70 127.735  o  ?  ?  ?  ?
    2   9 -10   1.440   5.470  ?   2.073  29.926  27.603  <  ?  ?  ?  ?
    2   9  -9   2.501   1.253  ?   6.257   1.569  20.994  <  ?  ?  ?  ?
    2   9  -8   9.199  10.036  ?  84.619 100.718  27.603  o  ?  ?  ?  ?
    2   9  -7  72.628  75.807  ? 5274.83 5746.64 408.904  o  ?  ?  ?  ?
    2   9  -6   -.129   1.300  ?    .017   1.690  25.711  <  ?  ?  ?  ?
    2   9  -5   4.615   6.168  ?  21.295  38.047  19.889  <  ?  ?  ?  ?
    2   9  -4   3.705   2.597  ?  13.725   6.743  13.436  <  ?  ?  ?  ?
    2   9  -3  68.870  67.575  ? 4743.01 4566.39 185.599  o  ?  ?  ?  ?
    2   9  -2  12.376  12.996  ? 153.176 168.893  16.257  o  ?  ?  ?  ?
    2   9  -1  47.327  46.851  ? 2239.88 2194.99  71.076  o  ?  ?  ?  ?
    2   9   0   9.393  10.649  ?  88.230 113.402  19.889  o  ?  ?  ?  ?
    2   9   1  52.662  51.848  ? 2773.27 2688.22  93.171  o  ?  ?  ?  ?
    2   9   2  13.179  13.876  ? 173.674 192.539  17.258  o  ?  ?  ?  ?
    2   9   3  67.712  67.869  ? 4584.90 4606.24 188.943  o  ?  ?  ?  ?
    2   9   4   7.786   8.537  ?  60.616  72.877  17.769  o  ?  ?  ?  ?
    2   9   5  32.389  33.834  ? 1049.05 1144.75  45.160  o  ?  ?  ?  ?
    2   9   6   7.048   6.535  ?  49.677  42.712  23.886  <  ?  ?  ?  ?
    2   9   7  74.232  70.563  ? 5510.44 4979.16 307.418  o  ?  ?  ?  ?
    2   9   8   6.939   5.235  ?  48.143  27.401  23.886  <  ?  ?  ?  ?
    2   9   9   2.697   7.320  ?   7.275  53.585  22.128  <  ?  ?  ?  ?
    2   9  10   2.651   2.006  ?   7.027   4.023  23.886  <  ?  ?  ?  ?
    2   9  11  51.778  50.148  ? 2680.92 2514.78 177.369  o  ?  ?  ?  ?
    2   9  12   4.844   2.009  ?  23.465   4.035  41.935  <  ?  ?  ?  ?
    2   9  13  17.990  19.869  ? 323.653 394.759  54.643  o  ?  ?  ?  ?
    2   9  14   2.350   1.102  ?   5.523   1.214  42.730  <  ?  ?  ?  ?
    2   9  15  35.893  33.970  ? 1288.31 1153.93  97.948  o  ?  ?  ?  ?
    2   9  16   -.082   1.478  ?    .007   2.183  57.386  <  ?  ?  ?  ?
    2   9  17  21.997  21.586  ? 483.875 465.934 101.609  o  ?  ?  ?  ?
    2  10 -14   7.862   8.438  ?  61.811  71.205  45.160  <  ?  ?  ?  ?
    2  10 -13  34.729  34.952  ? 1206.09 1221.63 106.595  o  ?  ?  ?  ?
    2  10 -12   4.609   3.173  ?  21.241  10.069  38.072  <  ?  ?  ?  ?
    2  10 -11  10.710  10.682  ? 114.697 114.110  38.830  o  ?  ?  ?  ?
    2  10 -10   9.361   8.777  ?  87.631  77.032  34.396  o  ?  ?  ?  ?
    2  10  -9  52.155  52.582  ? 2720.14 2764.90 264.076  o  ?  ?  ?  ?
    2  10  -8   2.413   4.444  ?   5.824  19.749  32.280  <  ?  ?  ?  ?
    2  10  -7   3.327   2.956  ?  11.069   8.738  26.965  <  ?  ?  ?  ?
    2  10  -6   8.985   8.905  ?  80.734  79.295  31.589  o  ?  ?  ?  ?
    2  10  -5  64.097  64.097  ? 4108.43 4108.45 282.248  o  ?  ?  ?  ?
    2  10  -4  11.799  14.199  ? 139.216 201.625  23.886  o  ?  ?  ?  ?
    2  10  -3  28.422  28.738  ? 807.812 825.859  56.464  o  ?  ?  ?  ?
    2  10  -2   2.872   3.561  ?   8.251  12.683  26.334  <  ?  ?  ?  ?
    2  10  -1  49.024  47.776  ? 2403.31 2282.51 155.319  o  ?  ?  ?  ?
    2  10   0  19.519  22.008  ? 380.973 484.357  38.830  o  ?  ?  ?  ?
    2  10   1  52.464  50.025  ? 2752.43 2502.53 141.917  o  ?  ?  ?  ?
    2  10   2   -.109   3.948  ?    .012  15.587  27.603  <  ?  ?  ?  ?
    2  10   3  32.487  33.075  ? 1055.44 1093.95  63.074  o  ?  ?  ?  ?
    2  10   4  11.846  14.619  ? 140.324 213.724  30.906  o  ?  ?  ?  ?
    2  10   5  57.161  55.034  ? 3267.39 3028.74 292.605  o  ?  ?  ?  ?
    2  10   6   4.930    .078  ?  24.307    .006  38.072  <  ?  ?  ?  ?
    2  10   7    .294   2.929  ?    .087   8.581  40.367  <  ?  ?  ?  ?
    2  10   8  12.094  12.363  ? 146.254 152.836  52.852  o  ?  ?  ?  ?
    2  10   9  51.567  52.282  ? 2659.19 2733.41 276.123  o  ?  ?  ?  ?
    2  10  10   7.884   5.729  ?  62.157  32.819  57.386  <  ?  ?  ?  ?
    2  10  11   9.982  11.571  ?  99.633 133.899  56.464  o  ?  ?  ?  ?
    2  10  12   5.860   3.768  ?  34.340  14.201  59.252  <  ?  ?  ?  ?
    2  10  13  29.641  29.085  ? 878.591 845.927 119.583  o  ?  ?  ?  ?
    2  10  14    .307   4.480  ?    .094  20.068  65.030  <  ?  ?  ?  ?
    2  10  15  17.172  18.333  ? 294.863 336.095 260.120  o  ?  ?  ?  ?
    2  11 -12  10.637   8.433  ? 113.139  71.123 202.618  <  ?  ?  ?  ?
    2  11 -11  32.737  33.305  ? 1071.72 1109.25  99.161  o  ?  ?  ?  ?
    2  11 -10   8.887  10.683  ?  78.984 114.116  47.656  <  ?  ?  ?  ?
    2  11  -9   4.995   4.035  ?  24.945  16.283  38.830  <  ?  ?  ?  ?
    2  11  -8  13.967  15.194  ? 195.070 230.848  48.504  o  ?  ?  ?  ?
    2  11  -7  44.789  44.496  ? 2006.08 1979.89 141.917  o  ?  ?  ?  ?
    2  11  -6  14.664  14.889  ? 215.038 221.681  86.229  o  ?  ?  ?  ?
    2  11  -5  10.703  12.902  ? 114.557 166.462  82.859  <  ?  ?  ?  ?
    2  11  -4  11.017   9.777  ? 121.379  95.593  82.859  o  ?  ?  ?  ?
    2  11  -3  45.056  43.085  ? 2030.00 1856.33 139.021  o  ?  ?  ?  ?
    2  11  -2  18.564  18.783  ? 344.640 352.813  43.532  o  ?  ?  ?  ?
    2  11  -1  29.997  29.707  ? 899.827 882.519  73.151  o  ?  ?  ?  ?
    2  11   0    .001   1.596  ?    .000   2.548  32.978  <  ?  ?  ?  ?
    2  11   1  33.618  32.073  ? 1130.14 1028.68 129.119  o  ?  ?  ?  ?
    2  11   2  17.788  15.249  ? 316.400 232.542 100.381  o  ?  ?  ?  ?
    2  11   3  40.225  36.293  ? 1618.02 1317.22 309.564  o  ?  ?  ?  ?
    2  11   4   1.627   5.599  ?   2.646  31.345  88.513  <  ?  ?  ?  ?
    2  11   5   7.753   9.211  ?  60.113  84.833  49.358  <  ?  ?  ?  ?
    2  11   6  15.130  14.638  ? 228.913 214.284  58.316  o  ?  ?  ?  ?
    2  11   7  38.911  39.278  ? 1514.09 1542.77 144.843  o  ?  ?  ?  ?
    2  11   8   5.893   9.970  ?  34.729  99.398  53.744  <  ?  ?  ?  ?
    2  11   9   2.306   6.037  ?   5.316  36.442  59.252  <  ?  ?  ?  ?
    2  11  10   5.513   4.915  ?  30.398  24.162  61.148  <  ?  ?  ?  ?
    2  11  11  29.505  29.306  ? 870.541 858.814 123.625  o  ?  ?  ?  ?
    2  11  12  17.534  17.332  ? 307.445 300.407 494.502  o  ?  ?  ?  ?
    2  12  -9  28.403  25.552  ? 806.757 652.887 358.665  o  ?  ?  ?  ?
    2  12  -8  14.848  11.412  ? 220.449 130.243 244.594  o  ?  ?  ?  ?
    2  12  -7    .088   1.192  ?    .008   1.422  88.513  <  ?  ?  ?  ?
    2  12  -6  12.660  12.957  ? 160.272 167.885 105.338  o  ?  ?  ?  ?
    2  12  -5  32.715  30.426  ? 1070.25 925.731 195.720  o  ?  ?  ?  ?
    2  12  -4  20.601  20.297  ? 424.420 411.988 136.154  o  ?  ?  ?  ?
    2  12  -3  16.055  14.028  ? 257.764 196.784 119.583  o  ?  ?  ?  ?
    2  12  -2   5.492   1.962  ?  30.166   3.851  67.015  <  ?  ?  ?  ?
    2  12  -1  27.497  26.264  ? 756.070 689.780 112.996  o  ?  ?  ?  ?
    2  12   0  21.510  19.583  ? 462.666 383.481  99.161  o  ?  ?  ?  ?
    2  12   1  27.949  25.286  ? 781.142 639.394 170.920  o  ?  ?  ?  ?
    2  12   2   9.442   8.733  ?  89.144  76.273 102.845  <  ?  ?  ?  ?
    2  12   3  16.940  16.965  ? 286.960 287.819 129.119  o  ?  ?  ?  ?
    2  12   4  18.904  17.119  ? 357.374 293.070 139.021  o  ?  ?  ?  ?
    2  12   5  28.636  26.346  ? 820.044 694.110 200.882  o  ?  ?  ?  ?
    2  12   6  12.810   9.054  ? 164.092  81.984 123.625  o  ?  ?  ?  ?
    2  12   7    .122   3.883  ?    .015  15.079  65.030  <  ?  ?  ?  ?
    2  12   8  11.236  14.368  ? 126.254 206.437 127.735  <  ?  ?  ?  ?
    2  12   9  26.068  24.157  ? 679.527 583.565 192.317  o  ?  ?  ?  ?
    2  13  -3  20.942  18.516  ? 438.580 342.844 187.267  o  ?  ?  ?  ?
    2  13  -2  20.691  20.459  ? 428.121 418.587 179.000  o  ?  ?  ?  ?
    2  13  -1  14.453  13.388  ? 208.893 179.247 109.133  o  ?  ?  ?  ?
    2  13   0   6.101    .575  ?  37.227    .330 156.846  <  ?  ?  ?  ?
    2  13   1  16.331  14.531  ? 266.688 211.140 172.521  o  ?  ?  ?  ?
    2  13   2  21.110  18.180  ? 445.618 330.523 449.391  o  ?  ?  ?  ?
    2  13   3  26.778  21.362  ? 717.043 456.350 561.861  o  ?  ?  ?  ?
    2  13   4  16.816   8.047  ? 282.788  64.757 527.644  <  ?  ?  ?  ?
    3   0 -23  34.144  31.273  ? 1165.82 977.973 276.123  o  ?  ?  ?  ?
    3   0 -21  12.123  14.963  ? 146.973 223.887 131.911  <  ?  ?  ?  ?
    3   0 -19  54.424  51.139  ? 2961.94 2615.18 338.141  o  ?  ?  ?  ?
    3   0 -17  77.742  74.758  ? 6043.86 5588.80 570.583  o  ?  ?  ?  ?
    3   0 -15  62.211  61.230  ? 3870.25 3749.10 298.908  o  ?  ?  ?  ?
    3   0 -13 107.415 103.605  ? 11538.0 10733.9 370.328  o  ?  ?  ?  ?
    3   0 -11  35.051  36.846  ? 1228.55 1357.60  51.967  o  ?  ?  ?  ?
    3   0  -9 191.467 187.565  ? 36659.5 35180.7 1384.20  o  ?  ?  ?  ?
    3   0  -7  48.316  42.893  ? 2334.41 1839.83  63.074  o  ?  ?  ?  ?
    3   0  -5 300.948 288.481  ? 90569.4 83221.2 3951.81  o  ?  ?  ?  ?
    3   0  -3 145.500 141.828  ? 21170.2 20115.0 2317.49  o  ?  ?  ?  ?
    3   0  -1  75.609  75.956  ? 5716.68 5769.31  69.031  o  ?  ?  ?  ?
    3   0   1  77.076  76.090  ? 5940.75 5789.71 112.996  o  ?  ?  ?  ?
    3   0   3  74.813  74.541  ? 5596.96 5556.30 107.861  o  ?  ?  ?  ?
    3   0   5 166.184 163.265  ? 27617.1 26655.3 1178.79  o  ?  ?  ?  ?
    3   0   7  17.282   5.596  ? 298.676  31.319  13.888  o  ?  ?  ?  ?
    3   0   9 126.502 127.683  ? 16002.7 16303.0 591.196  o  ?  ?  ?  ?
    3   0  11  29.028  31.614  ? 842.611 999.447  54.643  o  ?  ?  ?  ?
    3   0  13 115.979 103.656  ? 13451.0 10744.6 1255.51  o  ?  ?  ?  ?
    3   0  15  59.824  57.000  ? 3578.89 3248.94 246.508  o  ?  ?  ?  ?
    3   0  17  37.559  43.039  ? 1410.66 1852.32 224.025  o  ?  ?  ?  ?
    3   0  19  35.971  41.440  ? 1293.94 1717.26 262.094  o  ?  ?  ?  ?
    3   0  21   7.126  11.443  ?  50.781 130.932 166.161  <  ?  ?  ?  ?
    3   1 -23    .128   1.496  ?    .016   2.238 133.318  <  ?  ?  ?  ?
    3   1 -22   6.970   3.221  ?  48.584  10.373  86.229  <  ?  ?  ?  ?
    3   1 -21  43.077  39.546  ? 1855.65 1563.89 153.800  o  ?  ?  ?  ?
    3   1 -20   4.976   2.647  ?  24.764   7.009  47.656  <  ?  ?  ?  ?
    3   1 -19  30.993  32.011  ? 960.548 1024.73  88.513  o  ?  ?  ?  ?
    3   1 -18   3.826   1.102  ?  14.638   1.213  40.367  <  ?  ?  ?  ?
    3   1 -17  63.317  60.313  ? 4009.10 3637.70 195.720  o  ?  ?  ?  ?
    3   1 -16   1.445   4.660  ?   2.089  21.714  27.603  <  ?  ?  ?  ?
    3   1 -15  67.814  62.718  ? 4598.69 3933.60 258.153  o  ?  ?  ?  ?
    3   1 -14  17.483  12.940  ? 305.666 167.441  20.438  o  ?  ?  ?  ?
    3   1 -13  50.524  49.947  ? 2552.69 2494.70  70.050  o  ?  ?  ?  ?
    3   1 -12  16.607  18.405  ? 275.778 338.736   8.961  o  ?  ?  ?  ?
    3   1 -11 150.843 144.466  ? 22753.7 20870.4 513.704  o  ?  ?  ?  ?
    3   1 -10  30.805  31.517  ? 948.965 993.293  16.754  o  ?  ?  ?  ?
    3   1  -9  17.786  11.955  ? 316.359 142.927  12.126  o  ?  ?  ?  ?
    3   1  -8  24.404  25.703  ? 595.556 660.664  10.092  o  ?  ?  ?  ?
    3   1  -7 252.245 244.638  ? 63627.5 59847.8 1834.01  o  ?  ?  ?  ?
    3   1  -6  63.604  60.053  ? 4045.45 3606.41  43.532  o  ?  ?  ?  ?
    3   1  -5  34.237  34.486  ? 1172.19 1189.28   9.707  o  ?  ?  ?  ?
    3   1  -4  24.529  22.463  ? 601.648 504.606   5.677  o  ?  ?  ?  ?
    3   1  -3 218.230 220.001  ? 47624.3 48400.2 1238.26  o  ?  ?  ?  ?
    3   1  -2   6.945   6.866  ?  48.238  47.144   1.493  o  ?  ?  ?  ?
    3   1  -1  72.172  74.810  ? 5208.73 5596.52  30.906  o  ?  ?  ?  ?
    3   1   0  30.921  30.315  ? 956.121 918.975   8.244  o  ?  ?  ?  ?
    3   1   1 145.595 150.886  ? 21197.8 22766.5 636.598  o  ?  ?  ?  ?
    3   1   2   7.598   7.833  ?  57.736  61.352   2.523  o  ?  ?  ?  ?
    3   1   3 218.989 217.314  ? 47956.3 47225.4 1572.01  o  ?  ?  ?  ?
    3   1   4  72.357  70.488  ? 5235.55 4968.52  61.148  o  ?  ?  ?  ?
    3   1   5  69.345  70.081  ? 4808.78 4911.38  64.048  o  ?  ?  ?  ?
    3   1   6   5.311   2.602  ?  28.204   6.772   3.822  o  ?  ?  ?  ?
    3   1   7 146.934 152.088  ? 21589.5 23130.9 585.269  o  ?  ?  ?  ?
    3   1   8  22.404  23.104  ? 501.954 533.783   8.599  o  ?  ?  ?  ?
    3   1   9  15.879  16.539  ? 252.132 273.553   6.901  o  ?  ?  ?  ?
    3   1  10   9.315   9.533  ?  86.764  90.884   8.244  o  ?  ?  ?  ?
    3   1  11 137.459 138.359  ? 18895.1 19143.1 849.184  o  ?  ?  ?  ?
    3   1  12  36.824  32.861  ? 1355.98 1079.82  43.532  o  ?  ?  ?  ?
    3   1  13  54.694  52.826  ? 2991.40 2790.59  80.649  o  ?  ?  ?  ?
    3   1  14  14.591  12.007  ? 212.911 144.158  26.965  o  ?  ?  ?  ?
    3   1  15  67.515  67.386  ? 4558.31 4540.92 200.882  o  ?  ?  ?  ?
    3   1  16  20.557  20.926  ? 422.582 437.904  41.148  o  ?  ?  ?  ?
    3   1  17  50.347  51.582  ? 2534.80 2660.73 170.920  o  ?  ?  ?  ?
    3   1  18   2.543   2.241  ?   6.467   5.024  49.358  <  ?  ?  ?  ?
    3   1  19  25.974  27.059  ? 674.639 732.200  86.229  o  ?  ?  ?  ?
    3   1  20   4.012   8.962  ?  16.099  80.312  69.031  <  ?  ?  ?  ?
    3   1  21  33.681  36.021  ? 1134.44 1297.50 139.021  o  ?  ?  ?  ?
    3   1  22   -.163   2.123  ?    .026   4.506  74.200  <  ?  ?  ?  ?
    3   2 -23  28.021  26.533  ? 785.203 703.993 185.599  o  ?  ?  ?  ?
    3   2 -22   4.913   6.622  ?  24.137  43.852  82.859  <  ?  ?  ?  ?
    3   2 -21  11.909   9.161  ? 141.818  83.932  81.750  o  ?  ?  ?  ?
    3   2 -20   6.824   6.245  ?  46.564  38.998  61.148  <  ?  ?  ?  ?
    3   2 -19  49.658  46.254  ? 2465.95 2139.40 200.882  o  ?  ?  ?  ?
    3   2 -18  19.060  20.378  ? 363.268 415.246  51.090  o  ?  ?  ?  ?
    3   2 -17  36.735  34.254  ? 1349.49 1173.30  95.544  o  ?  ?  ?  ?
    3   2 -16  11.841  11.533  ? 140.204 133.019  33.683  o  ?  ?  ?  ?
    3   2 -15  56.574  53.378  ? 3200.60 2849.21 112.996  o  ?  ?  ?  ?
    3   2 -14  30.945  31.413  ? 957.571 986.790  40.367  o  ?  ?  ?  ?
    3   2 -13  84.382  82.715  ? 7120.26 6841.83 519.258  o  ?  ?  ?  ?
    3   2 -12  16.163  14.872  ? 261.237 221.162  12.126  o  ?  ?  ?  ?
    3   2 -11  54.681  52.839  ? 2990.04 2791.94  74.200  o  ?  ?  ?  ?
    3   2 -10  48.643  47.521  ? 2366.15 2258.20  40.367  o  ?  ?  ?  ?
    3   2  -9 142.851 138.393  ? 20406.5 19152.7 433.984  o  ?  ?  ?  ?
    3   2  -8  43.219  49.208  ? 1867.86 2421.40  20.994  o  ?  ?  ?  ?
    3   2  -7  22.916  21.665  ? 525.129 469.388   7.226  o  ?  ?  ?  ?
    3   2  -6  27.681  28.021  ? 766.237 785.174   9.707  o  ?  ?  ?  ?
    3   2  -5 186.484 187.044  ? 34776.2 34985.6 454.586  o  ?  ?  ?  ?
    3   2  -4 126.908 122.178  ? 16105.6 14927.5 211.407  o  ?  ?  ?  ?
    3   2  -3  76.759  83.130  ? 5891.96 6910.52  61.148  o  ?  ?  ?  ?
    3   2  -2  67.264  68.747  ? 4524.48 4726.19  28.249  o  ?  ?  ?  ?
    3   2  -1 185.072 192.278  ? 34251.5 36970.8 2110.58  o  ?  ?  ?  ?
    3   2   0  58.354  57.430  ? 3405.15 3298.22  85.098  o  ?  ?  ?  ?
    3   2   1 154.733 162.828  ? 23942.4 26513.1 329.214  o  ?  ?  ?  ?
    3   2   2  59.075  56.497  ? 3489.84 3191.96  22.128  o  ?  ?  ?  ?
    3   2   3 131.462 135.112  ? 17282.4 18255.3 231.400  o  ?  ?  ?  ?
    3   2   4  62.898  58.240  ? 3956.19 3391.86  31.589  o  ?  ?  ?  ?
    3   2   5 217.878 218.996  ? 47470.6 47959.3 820.939  o  ?  ?  ?  ?
    3   2   6  85.736  85.547  ? 7350.70 7318.21  82.859  o  ?  ?  ?  ?
    3   2   7  47.016  46.815  ? 2210.50 2191.61  19.889  o  ?  ?  ?  ?
    3   2   8  55.588  56.707  ? 3089.97 3215.67  26.334  o  ?  ?  ?  ?
    3   2   9 166.068 164.122  ? 27578.7 26936.2 966.943  o  ?  ?  ?  ?
    3   2  10  54.199  55.803  ? 2937.55 3114.02  48.504  o  ?  ?  ?  ?
    3   2  11  33.281  31.290  ? 1107.61 979.054  23.886  o  ?  ?  ?  ?
    3   2  12   7.682   9.552  ?  59.010  91.233  13.436  o  ?  ?  ?  ?
    3   2  13  86.740  94.049  ? 7523.83 8845.18 379.793  o  ?  ?  ?  ?
    3   2  14  39.847  38.115  ? 1587.81 1452.77  74.200  o  ?  ?  ?  ?
    3   2  15  44.044  46.987  ? 1939.87 2207.78  87.367  o  ?  ?  ?  ?
    3   2  16   2.711   1.081  ?   7.352   1.168  26.334  <  ?  ?  ?  ?
    3   2  17  35.557  35.468  ? 1264.27 1258.01  73.151  o  ?  ?  ?  ?
    3   2  18  20.602  24.206  ? 424.429 585.941  50.221  o  ?  ?  ?  ?
    3   2  19  43.317  44.113  ? 1876.32 1945.97 197.433  o  ?  ?  ?  ?
    3   2  20    .248   2.740  ?    .061   7.509  57.386  <  ?  ?  ?  ?
    3   2  21  12.131  14.311  ? 147.150 204.800  73.151  o  ?  ?  ?  ?
    3   2  22   4.802   8.870  ?  23.060  78.676 140.465  <  ?  ?  ?  ?
    3   3 -22   8.160   9.697  ?  66.582  94.040  53.744  <  ?  ?  ?  ?
    3   3 -21  33.217  32.593  ? 1103.34 1062.29 134.733  o  ?  ?  ?  ?
    3   3 -20  23.227  23.330  ? 539.487 544.283  86.229  o  ?  ?  ?  ?
    3   3 -19  24.212  21.139  ? 586.199 446.851  77.391  o  ?  ?  ?  ?
    3   3 -18   7.301   6.053  ?  53.307  36.643  45.984  <  ?  ?  ?  ?
    3   3 -17  59.902  53.185  ? 3588.22 2828.61 372.683  o  ?  ?  ?  ?
    3   3 -16  37.657  38.813  ? 1418.05 1506.45  85.098  o  ?  ?  ?  ?
    3   3 -15  45.688  42.402  ? 2087.40 1797.97  85.098  o  ?  ?  ?  ?
    3   3 -14    .345    .211  ?    .119    .045  13.436  <  ?  ?  ?  ?
    3   3 -13  44.584  41.259  ? 1987.71 1702.31  66.019  o  ?  ?  ?  ?
    3   3 -12  57.552  59.707  ? 3312.26 3564.87  97.948  o  ?  ?  ?  ?
    3   3 -11  84.977  86.840  ? 7221.07 7541.26 199.154  o  ?  ?  ?  ?
    3   3 -10  52.521  52.190  ? 2758.44 2723.80  43.532  o  ?  ?  ?  ?
    3   3  -9  24.031  26.858  ? 577.483 721.364  11.290  o  ?  ?  ?  ?
    3   3  -8  32.936  33.818  ? 1084.81 1143.68  18.814  o  ?  ?  ?  ?
    3   3  -7 106.094 105.969  ? 11255.9 11229.4 242.686  o  ?  ?  ?  ?
    3   3  -6  74.126  76.010  ? 5494.60 5777.57  88.513  o  ?  ?  ?  ?
    3   3  -5  95.116  95.597  ? 9047.07 9138.87 115.609  o  ?  ?  ?  ?
    3   3  -4  62.567  62.204  ? 3914.61 3869.38  42.730  o  ?  ?  ?  ?
    3   3  -3 154.387 155.927  ? 23835.4 24313.4 779.467  o  ?  ?  ?  ?
    3   3  -2 102.562 107.380  ? 10519.0 11530.4 131.911  o  ?  ?  ?  ?
    3   3  -1 151.836 158.326  ? 23054.1 25067.0 451.985  o  ?  ?  ?  ?
    3   3   0  37.517  35.673  ? 1407.51 1272.54   8.244  o  ?  ?  ?  ?
    3   3   1  79.480  81.186  ? 6317.03 6591.14  39.595  o  ?  ?  ?  ?
    3   3   2 108.487 108.904  ? 11769.5 11860.0 140.465  o  ?  ?  ?  ?
    3   3   3 187.878 191.958  ? 35298.2 36847.8 674.129  o  ?  ?  ?  ?
    3   3   4  39.063  38.691  ? 1525.95 1496.98  12.126  o  ?  ?  ?  ?
    3   3   6  83.408  85.032  ? 6956.95 7230.37  87.367  o  ?  ?  ?  ?
    3   3   7 138.807 137.256  ? 19267.5 18839.2 423.862  o  ?  ?  ?  ?
    3   3   8  52.583  51.711  ? 2764.97 2674.00  50.221  o  ?  ?  ?  ?
    3   3   9   5.104    .422  ?  26.053    .178   6.901  <  ?  ?  ?  ?
    3   3  10  44.551  47.896  ? 1984.75 2294.06  45.160  o  ?  ?  ?  ?
    3   3  11  91.684  89.937  ? 8406.01 8088.65 274.097  o  ?  ?  ?  ?
    3   3  12  36.191  39.648  ? 1309.79 1572.00  45.984  o  ?  ?  ?  ?
    3   3  13  40.067  41.644  ? 1605.33 1734.24  51.090  o  ?  ?  ?  ?
    3   3  14   8.259  12.918  ?  68.207 166.863  23.886  o  ?  ?  ?  ?
    3   3  15  46.924  49.720  ? 2201.85 2472.04 107.861  o  ?  ?  ?  ?
    3   3  16  42.179  43.591  ? 1779.04 1900.17  90.827  o  ?  ?  ?  ?
    3   3  17  42.923  42.634  ? 1842.41 1817.64 115.609  o  ?  ?  ?  ?
    3   3  18   3.745   4.715  ?  14.028  22.230  33.683  <  ?  ?  ?  ?
    3   3  19  19.229  21.002  ? 369.757 441.091  52.852  o  ?  ?  ?  ?
    3   3  20  21.967  21.204  ? 482.547 449.604  86.229  o  ?  ?  ?  ?
    3   3  21  32.384  30.398  ? 1048.74 924.030 127.735  o  ?  ?  ?  ?
    3   3  22    .355   7.233  ?    .126  52.312 556.083  <  ?  ?  ?  ?
    3   4 -22  16.850  17.408  ? 283.932 303.022 342.650  o  ?  ?  ?  ?
    3   4 -21   9.509   9.642  ?  90.428  92.973  45.984  o  ?  ?  ?  ?
    3   4 -20  11.414  10.900  ? 130.291 118.800  39.595  o  ?  ?  ?  ?
    3   4 -19  34.320  32.859  ? 1177.86 1079.69  99.161  o  ?  ?  ?  ?
    3   4 -18  39.863  37.187  ? 1589.02 1382.90 131.911  o  ?  ?  ?  ?
    3   4 -17  25.557  23.847  ? 653.168 568.695  46.817  o  ?  ?  ?  ?
    3   4 -16   3.508   4.012  ?  12.307  16.098  19.889  <  ?  ?  ?  ?
    3   4 -15  41.532  40.611  ? 1724.92 1649.25  76.320  o  ?  ?  ?  ?
    3   4 -14  65.719  66.810  ? 4318.98 4463.57 206.111  o  ?  ?  ?  ?
    3   4 -13  62.252  60.635  ? 3875.26 3676.62 169.326  o  ?  ?  ?  ?
    3   4 -12   9.350   8.911  ?  87.418  79.399  19.348  o  ?  ?  ?  ?
    3   4 -11  26.745  24.762  ? 715.314 613.171  35.844  o  ?  ?  ?  ?
    3   4 -10  69.178  72.855  ? 4785.58 5307.79 136.154  o  ?  ?  ?  ?
    3   4  -9  98.255 100.196  ? 9653.99 10039.2 284.304  o  ?  ?  ?  ?
    3   4  -8  59.041  59.639  ? 3485.87 3556.76  67.015  o  ?  ?  ?  ?
    3   4  -7  24.336  21.506  ? 592.239 462.504  15.287  o  ?  ?  ?  ?
    3   4  -6  34.167  30.496  ? 1167.41 930.004  15.287  o  ?  ?  ?  ?
    3   4  -5  93.589  96.414  ? 8758.97 9295.67  94.354  o  ?  ?  ?  ?
    3   4  -4 100.527 101.265  ? 10105.6 10254.5 123.625  o  ?  ?  ?  ?
    3   4  -3  71.831  70.174  ? 5159.74 4924.41 100.381  o  ?  ?  ?  ?
    3   4  -2  35.459  36.380  ? 1257.36 1323.52  18.288  o  ?  ?  ?  ?
    3   4  -1 118.702 120.782  ? 14090.1 14588.4 237.010  o  ?  ?  ?  ?
    3   4   0 135.344 136.898  ? 18317.9 18741.1 213.187  o  ?  ?  ?  ?
    3   4   1 142.643 141.231  ? 20347.1 19946.2 327.001  o  ?  ?  ?  ?
    3   4   2   3.718   5.417  ?  13.820  29.349   4.837  <  ?  ?  ?  ?
    3   4   3  82.426  83.227  ? 6794.12 6926.65  79.556  o  ?  ?  ?  ?
    3   4   4  72.446  75.280  ? 5248.47 5667.03  63.074  o  ?  ?  ?  ?
    3   4   5  99.807 101.174  ? 9961.51 10236.2 105.338  o  ?  ?  ?  ?
    3   4   6  58.371  55.121  ? 3407.13 3038.28  38.830  o  ?  ?  ?  ?
    3   4   7  18.456  19.439  ? 340.626 377.857   7.558  o  ?  ?  ?  ?
    3   4   8  87.811  88.227  ? 7710.78 7784.04 179.000  o  ?  ?  ?  ?
    3   4   9  89.190  90.130  ? 7954.80 8123.35 286.368  o  ?  ?  ?  ?
    3   4  10  42.480  42.066  ? 1804.59 1769.51  45.984  o  ?  ?  ?  ?
    3   4  11  29.602  32.192  ? 876.289 1036.31  30.231  o  ?  ?  ?  ?
    3   4  12  37.804  39.821  ? 1429.13 1585.72  52.852  o  ?  ?  ?  ?
    3   4  13  74.216  71.077  ? 5507.96 5051.93 246.508  o  ?  ?  ?  ?
    3   4  14  33.910  35.205  ? 1149.86 1239.39  44.342  o  ?  ?  ?  ?
    3   4  15  27.789  27.356  ? 772.223 748.330  47.656  o  ?  ?  ?  ?
    3   4  16   -.133   1.363  ?    .018   1.859  26.334  <  ?  ?  ?  ?
    3   4  17  26.060  28.428  ? 679.115 808.178  56.464  o  ?  ?  ?  ?
    3   4  18  36.178  36.261  ? 1308.82 1314.88 119.583  o  ?  ?  ?  ?
    3   4  19  29.408  29.996  ? 864.801 899.779  81.750  o  ?  ?  ?  ?
    3   4  20  10.524   9.955  ? 110.758  99.100  48.504  o  ?  ?  ?  ?
    3   4  21   8.827   7.577  ?  77.918  57.413  54.643  <  ?  ?  ?  ?
    3   5 -22  18.348  13.964  ? 336.647 194.994 467.705  o  ?  ?  ?  ?
    3   5 -21  16.868  18.399  ? 284.520 338.537  90.827  o  ?  ?  ?  ?
    3   5 -20  27.412  29.968  ? 751.433 898.108 111.701  o  ?  ?  ?  ?
    3   5 -19   9.522  12.543  ?  90.673 157.318  80.649  <  ?  ?  ?  ?
    3   5 -18  12.639   8.415  ? 159.751  70.808  64.048  o  ?  ?  ?  ?
    3   5 -17  22.594  25.833  ? 510.488 667.328  52.852  o  ?  ?  ?  ?
    3   5 -15  41.699  42.794  ? 1738.78 1831.31 122.271  o  ?  ?  ?  ?
    3   5 -14   7.410   9.308  ?  54.910  86.648  23.886  <  ?  ?  ?  ?
    3   5 -13  19.670  20.332  ? 386.921 413.395  35.844  o  ?  ?  ?  ?
    3   5 -12  70.419  74.360  ? 4958.77 5529.35 214.975  o  ?  ?  ?  ?
    3   5 -11  72.864  69.931  ? 5309.13 4890.38 360.982  o  ?  ?  ?  ?
    3   5 -10  31.046  33.506  ? 963.871 1122.66  51.090  o  ?  ?  ?  ?
    3   5  -9  20.581  21.945  ? 423.579 481.602  20.438  o  ?  ?  ?  ?
    3   5  -8  56.739  60.178  ? 3219.27 3621.39  90.827  o  ?  ?  ?  ?
    3   5  -7  87.243  92.324  ? 7611.35 8523.79 231.400  o  ?  ?  ?  ?
    3   5  -6  95.644  96.015  ? 9147.76 9218.87 214.975  o  ?  ?  ?  ?
    3   5  -5  12.259   9.837  ? 150.279  96.772   7.226  o  ?  ?  ?  ?
    3   5  -4  36.285  39.053  ? 1316.63 1525.16  15.769  o  ?  ?  ?  ?
    3   5  -3  91.987  94.646  ? 8461.67 8957.95 218.573  o  ?  ?  ?  ?
    3   5  -2 137.423 139.765  ? 18885.2 19534.4 989.873  o  ?  ?  ?  ?
    3   5  -1  52.674  53.436  ? 2774.50 2855.43  42.730  o  ?  ?  ?  ?
    3   5   0  13.492  15.299  ? 182.037 234.071   7.226  o  ?  ?  ?  ?
    3   5   1  51.550  52.808  ? 2657.42 2788.64  35.844  o  ?  ?  ?  ?
    3   5   2 136.588 137.811  ? 18656.2 18992.0 331.434  o  ?  ?  ?  ?
    3   5   3  56.828  58.262  ? 3229.40 3394.46  45.160  o  ?  ?  ?  ?
    3   5   4  42.883  43.833  ? 1838.98 1921.34  31.589  o  ?  ?  ?  ?
    3   5   5  34.417  34.674  ? 1184.53 1202.26  18.288  o  ?  ?  ?  ?
    3   5   6 107.163 106.669  ? 11483.9 11378.3 278.157  o  ?  ?  ?  ?
    3   5   7  87.563  88.177  ? 7667.30 7775.21 199.154  o  ?  ?  ?  ?
    3   5   8  49.349  51.188  ? 2435.31 2620.26  64.048  o  ?  ?  ?  ?
    3   5   9  18.927  21.515  ? 358.215 462.906  16.257  o  ?  ?  ?  ?
    3   5  10  52.264  50.487  ? 2731.57 2548.92  82.859  o  ?  ?  ?  ?
    3   5  11  72.732  72.104  ? 5289.93 5198.95 195.720  o  ?  ?  ?  ?
    3   5  12  39.335  39.782  ? 1547.21 1582.57  54.643  o  ?  ?  ?  ?
    3   5  13  18.918  16.960  ? 357.902 287.635  25.095  o  ?  ?  ?  ?
    3   5  14    .719   1.784  ?    .517   3.183  18.288  <  ?  ?  ?  ?
    3   5  15  32.442  32.672  ? 1052.50 1067.43  52.852  o  ?  ?  ?  ?
    3   5  16  50.722  51.905  ? 2572.76 2694.15 159.921  o  ?  ?  ?  ?
    3   5  17  21.194  23.749  ? 449.205 564.003  45.984  o  ?  ?  ?  ?
    3   5  18   7.201   8.597  ?  51.850  73.901  40.367  <  ?  ?  ?  ?
    3   5  19   9.911  13.880  ?  98.227 192.667  54.643  o  ?  ?  ?  ?
    3   5  20  25.401  25.906  ? 645.208 671.099  78.470  o  ?  ?  ?  ?
    3   5  21  16.579  17.630  ? 274.876 310.824 120.923  o  ?  ?  ?  ?
    3   6 -19  13.776  15.596  ? 189.769 243.238 152.289  o  ?  ?  ?  ?
    3   6 -18  30.668  33.974  ? 940.544 1154.24 114.299  o  ?  ?  ?  ?
    3   6 -17  11.141  13.515  ? 124.114 182.661  38.830  o  ?  ?  ?  ?
    3   6 -16   4.574   2.790  ?  20.918   7.784  32.280  <  ?  ?  ?  ?
    3   6 -15  15.745  17.709  ? 247.899 313.626  34.396  o  ?  ?  ?  ?
    3   6 -14  59.209  60.374  ? 3505.71 3644.98 358.665  o  ?  ?  ?  ?
    3   6 -13  42.531  44.184  ? 1808.93 1952.22 104.087  o  ?  ?  ?  ?
    3   6 -12  31.386  31.909  ? 985.108 1018.17  78.470  o  ?  ?  ?  ?
    3   6 -11   7.903   9.510  ?  62.459  90.441  20.994  o  ?  ?  ?  ?
    3   6 -10  80.620  80.778  ? 6499.61 6525.06 475.665  o  ?  ?  ?  ?
    3   6  -9  64.175  62.453  ? 4118.42 3900.40 303.148  o  ?  ?  ?  ?
    3   6  -8  66.806  68.685  ? 4462.97 4717.62 126.357  o  ?  ?  ?  ?
    3   6  -7   4.229    .996  ?  17.880    .991  14.347  <  ?  ?  ?  ?
    3   6  -6  55.319  59.634  ? 3060.18 3556.24  72.110  o  ?  ?  ?  ?
    3   6  -5  69.051  68.598  ? 4768.08 4705.69  95.544  o  ?  ?  ?  ?
    3   6  -4 103.636 104.231  ? 10740.4 10864.0 222.200  o  ?  ?  ?  ?
    3   6  -3  16.083  15.526  ? 258.661 241.062  10.883  o  ?  ?  ?  ?
    3   6  -2  38.084  40.073  ? 1450.38 1605.85  26.965  o  ?  ?  ?  ?
    3   6  -1  62.475  56.886  ? 3903.07 3235.97  61.148  o  ?  ?  ?  ?
    3   6   0 147.353 144.087  ? 21712.8 20761.0 481.010  o  ?  ?  ?  ?
    3   6   1  49.633  49.483  ? 2463.45 2448.62  45.984  o  ?  ?  ?  ?
    3   6   2  12.689  16.056  ? 161.001 257.792   8.961  o  ?  ?  ?  ?
    3   6   3   9.155  11.205  ?  83.811 125.550  10.484  o  ?  ?  ?  ?
    3   6   4 123.085 121.551  ? 15150.0 14774.6 375.045  o  ?  ?  ?  ?
    3   6   5  31.199  32.160  ? 973.357 1034.26  24.487  o  ?  ?  ?  ?
    3   6   6  59.837  61.050  ? 3580.53 3727.05  88.513  o  ?  ?  ?  ?
    3   6   7   4.814   2.616  ?  23.177   6.843  14.813  <  ?  ?  ?  ?
    3   6   8  58.442  56.294  ? 3415.49 3169.03  99.161  o  ?  ?  ?  ?
    3   6   9  49.779  47.529  ? 2477.90 2258.99  88.513  o  ?  ?  ?  ?
    3   6  10  68.426  67.669  ? 4682.08 4579.16 119.583  o  ?  ?  ?  ?
    3   6  11  22.839  21.936  ? 521.624 481.173  24.487  o  ?  ?  ?  ?
    3   6  12  24.830  25.197  ? 616.511 634.886  28.249  o  ?  ?  ?  ?
    3   6  13  20.195  19.108  ? 407.832 365.097  25.711  o  ?  ?  ?  ?
    3   6  14  63.154  60.746  ? 3988.39 3690.04 180.639  o  ?  ?  ?  ?
    3   6  15  21.705  22.078  ? 471.122 487.433  34.396  o  ?  ?  ?  ?
    3   6  16    .081    .497  ?    .007    .247  25.095  <  ?  ?  ?  ?
    3   6  17  17.338  17.184  ? 300.613 295.282  43.532  o  ?  ?  ?  ?
    3   6  18  34.047  35.046  ? 1159.20 1228.22  77.391  o  ?  ?  ?  ?
    3   6  19  14.209  13.936  ? 201.905 194.213  45.160  o  ?  ?  ?  ?
    3   6  20   8.556  10.900  ?  73.203 118.820  81.750  <  ?  ?  ?  ?
    3   7 -18   7.122   7.247  ?  50.718  52.523  59.252  <  ?  ?  ?  ?
    3   7 -17  12.362  10.785  ? 152.824 116.315  61.148  o  ?  ?  ?  ?
    3   7 -16  36.584  40.555  ? 1338.36 1644.71 129.119  o  ?  ?  ?  ?
    3   7 -15   7.792   9.846  ?  60.717  96.941  45.160  <  ?  ?  ?  ?
    3   7 -14  18.367  18.739  ? 337.349 351.156  55.550  o  ?  ?  ?  ?
    3   7 -13  10.774   9.521  ? 116.085  90.642  39.595  o  ?  ?  ?  ?
    3   7 -12  59.702  62.578  ? 3564.34 3916.06 240.787  o  ?  ?  ?  ?
    3   7 -11  31.246  32.469  ? 976.330 1054.21  87.367  o  ?  ?  ?  ?
    3   7 -10  46.614  46.930  ? 2172.90 2202.43 147.799  o  ?  ?  ?  ?
    3   7  -9  12.965  14.550  ? 168.094 211.711  25.095  o  ?  ?  ?  ?
    3   7  -8  71.907  71.757  ? 5170.54 5149.08 242.686  o  ?  ?  ?  ?
    3   7  -7  25.338  26.336  ? 642.027 693.591  35.844  o  ?  ?  ?  ?
    3   7  -6  78.056  77.387  ? 6092.77 5988.76 161.470  o  ?  ?  ?  ?
    3   7  -5   9.348   8.860  ?  87.383  78.502  14.347  o  ?  ?  ?  ?
    3   7  -4  49.567  49.580  ? 2456.93 2458.15  70.050  o  ?  ?  ?  ?
    3   7  -3  37.292  40.068  ? 1390.71 1605.47  30.231  o  ?  ?  ?  ?
    3   7  -2 107.098  99.663  ? 11469.9 9932.62 237.010  o  ?  ?  ?  ?
    3   7  -1  12.765  14.617  ? 162.942 213.654  12.555  o  ?  ?  ?  ?
    3   7   0    .018    .944  ?    .000    .891   8.244  <  ?  ?  ?  ?
    3   7   1  22.060  19.635  ? 486.627 385.514  18.288  o  ?  ?  ?  ?
    3   7   2  94.996  96.041  ? 9024.31 9223.97 227.698  o  ?  ?  ?  ?
    3   7   3  20.251  21.524  ? 410.119 463.302  16.754  o  ?  ?  ?  ?
    3   7   4  49.339  49.763  ? 2434.33 2476.39  52.852  o  ?  ?  ?  ?
    3   7   5  12.234  14.036  ? 149.659 197.017  13.888  o  ?  ?  ?  ?
    3   7   6  77.441  78.094  ? 5997.10 6098.61 229.545  o  ?  ?  ?  ?
    3   7   7  23.447  25.355  ? 549.752 642.865  29.563  o  ?  ?  ?  ?
    3   7   8  72.298  68.804  ? 5227.01 4733.96 175.746  o  ?  ?  ?  ?
    3   7   9   9.439   8.843  ?  89.095  78.200  22.128  o  ?  ?  ?  ?
    3   7  10  39.698  39.562  ? 1575.96 1565.14  68.019  o  ?  ?  ?  ?
    3   7  11  22.598  23.910  ? 510.674 571.692  32.280  o  ?  ?  ?  ?
    3   7  12  70.022  66.865  ? 4903.05 4470.95 204.360  o  ?  ?  ?  ?
    3   7  13   5.054   7.156  ?  25.545  51.206  22.707  <  ?  ?  ?  ?
    3   7  14  17.832  19.927  ? 317.974 397.072  28.902  o  ?  ?  ?  ?
    3   7  15  11.492  11.108  ? 132.072 123.385  29.563  o  ?  ?  ?  ?
    3   7  16  41.289  41.014  ? 1704.76 1682.16  91.995  o  ?  ?  ?  ?
    3   7  17  10.207   8.842  ? 104.186  78.179  41.935  o  ?  ?  ?  ?
    3   7  18    .243   3.680  ?    .059  13.542  45.984  <  ?  ?  ?  ?
    3   7  19   7.736   3.940  ?  59.853  15.522  67.015  <  ?  ?  ?  ?
    3   8 -18  27.261  26.865  ? 743.175 721.707 216.770  o  ?  ?  ?  ?
    3   8 -17   6.309    .353  ?  39.809    .124  60.197  <  ?  ?  ?  ?
    3   8 -16   -.044    .146  ?    .002    .021  49.358  <  ?  ?  ?  ?
    3   8 -15   7.650   4.373  ?  58.516  19.126  51.967  <  ?  ?  ?  ?
    3   8 -14  47.034  49.463  ? 2212.19 2446.54 194.015  o  ?  ?  ?  ?
    3   8 -13   5.186   4.729  ?  26.894  22.364  44.342  <  ?  ?  ?  ?
    3   8 -12  27.300  28.074  ? 745.296 788.123  83.975  o  ?  ?  ?  ?
    3   8 -11  10.184  10.576  ? 103.717 111.847  42.730  o  ?  ?  ?  ?
    3   8 -10  50.055  52.082  ? 2505.51 2712.57 183.938  o  ?  ?  ?  ?
    3   8  -9   -.411   1.201  ?    .169   1.442  36.579  <  ?  ?  ?  ?
    3   8  -8  48.895  50.045  ? 2390.71 2504.45 238.895  o  ?  ?  ?  ?
    3   8  -7    .018   5.261  ?    .000  27.677  26.334  <  ?  ?  ?  ?
    3   8  -6  41.539  40.760  ? 1725.50 1661.36  73.151  o  ?  ?  ?  ?
    3   8  -5   9.557  14.116  ?  91.343 199.258  21.557  o  ?  ?  ?  ?
    3   8  -4  87.683  89.032  ? 7688.29 7926.72 250.360  o  ?  ?  ?  ?
    3   8  -3   4.202   7.307  ?  17.655  53.392  22.128  <  ?  ?  ?  ?
    3   8  -2  24.526  26.477  ? 601.533 701.040  34.396  o  ?  ?  ?  ?
    3   8  -1  17.921  20.608  ? 321.175 424.701  19.889  o  ?  ?  ?  ?
    3   8   0  90.924  91.084  ? 8267.14 8296.31 298.908  o  ?  ?  ?  ?
    3   8   1   4.302   5.771  ?  18.503  33.308  14.813  <  ?  ?  ?  ?
    3   8   2   4.042  10.625  ?  16.338 112.900  14.347  <  ?  ?  ?  ?
    3   8   3   4.957   4.861  ?  24.570  23.626  12.992  <  ?  ?  ?  ?
    3   8   4  72.933  74.413  ? 5319.28 5537.26 182.284  o  ?  ?  ?  ?
    3   8   5  21.637  20.604  ? 468.149 424.532  28.902  o  ?  ?  ?  ?
    3   8   6  49.061  49.003  ? 2406.95 2401.26  86.229  o  ?  ?  ?  ?
    3   8   7  12.229  13.206  ? 149.547 174.394  21.557  o  ?  ?  ?  ?
    3   8   9  13.727  15.140  ? 188.433 229.208  26.965  o  ?  ?  ?  ?
    3   8  10  57.044  56.023  ? 3254.00 3138.63 170.920  o  ?  ?  ?  ?
    3   8  11   4.717    .046  ?  22.252    .002  24.487  <  ?  ?  ?  ?
    3   8  12  27.382  26.722  ? 749.755 714.078  45.160  o  ?  ?  ?  ?
    3   8  13   8.082   6.158  ?  65.323  37.921  26.965  <  ?  ?  ?  ?
    3   8  14  49.762  47.501  ? 2476.25 2256.35 112.996  o  ?  ?  ?  ?
    3   8  15   4.924   2.518  ?  24.250   6.340  29.563  <  ?  ?  ?  ?
    3   8  16   6.224   5.515  ?  38.734  30.410  34.396  <  ?  ?  ?  ?
    3   8  17   2.810   1.954  ?   7.896   3.819  40.367  <  ?  ?  ?  ?
    3   8  18  29.898  30.726  ? 893.881 944.063 194.015  o  ?  ?  ?  ?
    3   9 -16  31.858  33.003  ? 1014.90 1089.23 268.062  o  ?  ?  ?  ?
    3   9 -15    .070   2.637  ?    .005   6.956  55.550  <  ?  ?  ?  ?
    3   9 -14   4.321   6.421  ?  18.675  41.225  52.852  <  ?  ?  ?  ?
    3   9 -13   5.797   2.536  ?  33.603   6.431  48.504  <  ?  ?  ?  ?
    3   9 -12  46.221  45.623  ? 2136.38 2081.48 318.223  o  ?  ?  ?  ?
    3   9 -11   3.632   4.596  ?  13.192  21.123  49.358  <  ?  ?  ?  ?
    3   9 -10  29.736  32.037  ? 884.204 1026.38  99.161  o  ?  ?  ?  ?
    3   9  -9   6.618   2.117  ?  43.792   4.481  43.532  <  ?  ?  ?  ?
    3   9  -8  49.243  48.962  ? 2424.83 2397.27 202.618  o  ?  ?  ?  ?
    3   9  -7  18.080  20.386  ? 326.874 415.573  62.108  o  ?  ?  ?  ?
    3   9  -6  49.084  50.472  ? 2409.28 2547.47 175.746  o  ?  ?  ?  ?
    3   9  -5  18.452  21.174  ? 340.494 448.351  32.280  o  ?  ?  ?  ?
    3   9  -4  29.512  29.838  ? 870.929 890.292  51.967  o  ?  ?  ?  ?
    3   9  -3   -.080   5.140  ?    .006  26.423  25.095  <  ?  ?  ?  ?
    3   9  -2  76.898  77.910  ? 5913.28 6069.91 288.440  o  ?  ?  ?  ?
    3   9  -1   2.792    .112  ?   7.797    .013  22.128  <  ?  ?  ?  ?
    3   9   0   -.084   1.875  ?    .007   3.514  22.128  <  ?  ?  ?  ?
    3   9   1   -.118   1.309  ?    .014   1.714  18.814  <  ?  ?  ?  ?
    3   9   2  88.149  84.663  ? 7770.18 7167.85 494.502  o  ?  ?  ?  ?
    3   9   4  20.589  23.340  ? 423.923 544.770  38.830  o  ?  ?  ?  ?
    3   9   5   6.241   7.079  ?  38.956  50.118  28.902  <  ?  ?  ?  ?
    3   9   6  61.012  57.940  ? 3722.45 3357.03 298.908  o  ?  ?  ?  ?
    3   9   7   2.943   2.097  ?   8.663   4.396  27.603  <  ?  ?  ?  ?
    3   9   8  44.147  43.414  ? 1948.95 1884.81 149.288  o  ?  ?  ?  ?
    3   9   9   6.239   1.125  ?  38.924   1.267  32.280  <  ?  ?  ?  ?
    3   9  10  35.387  34.889  ? 1252.21 1217.25 107.861  o  ?  ?  ?  ?
    3   9  11   4.574   1.599  ?  20.926   2.557  41.148  <  ?  ?  ?  ?
    3   9  12  43.409  42.297  ? 1884.36 1789.04 137.584  o  ?  ?  ?  ?
    3   9  13   -.015   2.129  ?    .000   4.535  34.396  <  ?  ?  ?  ?
    3   9  14   8.548  10.561  ?  73.076 111.535  40.367  <  ?  ?  ?  ?
    3   9  15    .045   3.356  ?    .002  11.261  51.967  <  ?  ?  ?  ?
    3   9  16  32.612  31.381  ? 1063.54 984.753 200.882  o  ?  ?  ?  ?
    3   9  17   2.334   1.451  ?   5.448   2.106 250.360  <  ?  ?  ?  ?
    3  10 -13    .302   7.567  ?    .091  57.261  71.076  <  ?  ?  ?  ?
    3  10 -12  13.024  13.210  ? 169.622 174.511  65.030  o  ?  ?  ?  ?
    3  10 -11    .070   3.601  ?    .005  12.965  59.252  <  ?  ?  ?  ?
    3  10 -10  34.051  34.461  ? 1159.44 1187.53 143.376  o  ?  ?  ?  ?
    3  10  -9   8.246  11.103  ?  67.992 123.267  59.252  <  ?  ?  ?  ?
    3  10  -8  33.010  32.470  ? 1089.66 1054.27 136.154  o  ?  ?  ?  ?
    3  10  -7   6.418   2.510  ?  41.187   6.300  57.386  <  ?  ?  ?  ?
    3  10  -6  37.180  38.742  ? 1382.36 1500.97 159.921  o  ?  ?  ?  ?
    3  10  -5  16.224  18.018  ? 263.224 324.659  39.595  o  ?  ?  ?  ?
    3  10  -4  50.389  50.531  ? 2539.01 2553.33 133.318  o  ?  ?  ?  ?
    3  10  -3    .287   2.687  ?    .082   7.220  25.095  <  ?  ?  ?  ?
    3  10  -2    .566   6.909  ?    .321  47.730  26.965  <  ?  ?  ?  ?
    3  10  -1  14.616  16.582  ? 213.627 274.959  37.322  o  ?  ?  ?  ?
    3  10   0  66.162  64.689  ? 4377.35 4184.62 224.025  o  ?  ?  ?  ?
    3  10   1   8.003   9.267  ?  64.052  85.878  33.683  <  ?  ?  ?  ?
    3  10   2   7.725   9.791  ?  59.676  95.856  33.683  <  ?  ?  ?  ?
    3  10   3   8.920   9.178  ?  79.572  84.239  28.902  o  ?  ?  ?  ?
    3  10   4  59.161  59.077  ? 3500.01 3490.13 272.078  o  ?  ?  ?  ?
    3  10   5   2.055   6.165  ?   4.223  38.011  25.711  <  ?  ?  ?  ?
    3  10   6  24.415  26.482  ? 596.116 701.309  49.358  o  ?  ?  ?  ?
    3  10   7   4.770   4.865  ?  22.755  23.669  33.683  <  ?  ?  ?  ?
    3  10   8  36.952  37.399  ? 1365.47 1398.66 104.087  o  ?  ?  ?  ?
    3  10   9  10.263  12.363  ? 105.323 152.845  43.532  o  ?  ?  ?  ?
    3  10  10  32.167  31.853  ? 1034.69 1014.63 144.843  o  ?  ?  ?  ?
    3  10  11   8.054   6.619  ?  64.859  43.811  57.386  <  ?  ?  ?  ?
    3  10  12  13.600  12.846  ? 184.956 165.008  73.151  o  ?  ?  ?  ?
    3  10  13   8.991   7.920  ?  80.842  62.733  77.391  <  ?  ?  ?  ?
    3  10  14  30.998  27.707  ? 960.861 767.691 579.372  o  ?  ?  ?  ?
    3  11 -11   7.685  11.999  ?  59.052 143.983 163.026  <  ?  ?  ?  ?
    3  11 -10  19.020  17.188  ? 361.773 295.416 101.609  o  ?  ?  ?  ?
    3  11  -9   4.392   1.744  ?  19.288   3.042  75.256  <  ?  ?  ?  ?
    3  11  -8  23.696  24.298  ? 561.499 590.410 116.926  o  ?  ?  ?  ?
    3  11  -7  13.439  13.326  ? 180.600 177.587  88.513  o  ?  ?  ?  ?
    3  11  -6  34.758  33.622  ? 1208.12 1130.41 187.267  o  ?  ?  ?  ?
    3  11  -5   9.310   6.535  ?  86.675  42.708  87.367  <  ?  ?  ?  ?
    3  11  -4  17.616  17.726  ? 310.337 314.195  58.316  o  ?  ?  ?  ?
    3  11  -3  13.861  15.366  ? 192.128 236.112  45.984  o  ?  ?  ?  ?
    3  11  -2  44.447  43.900  ? 1975.50 1927.19 118.251  o  ?  ?  ?  ?
    3  11  -1  18.927  18.971  ? 358.243 359.904  50.221  o  ?  ?  ?  ?
    3  11   0    .063   1.369  ?    .004   1.874  35.844  <  ?  ?  ?  ?
    3  11   1   2.282   9.638  ?   5.209  92.882  41.148  <  ?  ?  ?  ?
    3  11   2  48.911  45.624  ? 2392.26 2081.54 270.066  o  ?  ?  ?  ?
    3  11   3  14.990  14.730  ? 224.686 216.974  62.108  o  ?  ?  ?  ?
    3  11   4  10.158  13.634  ? 103.193 185.899  60.197  o  ?  ?  ?  ?
    3  11   5   9.864   9.352  ?  97.299  87.457  46.817  o  ?  ?  ?  ?
    3  11   6  29.621  30.911  ? 877.393 955.485 106.595  o  ?  ?  ?  ?
    3  11   7  13.986  16.809  ? 195.609 282.540  62.108  o  ?  ?  ?  ?
    3  11   8  21.509  22.378  ? 462.652 500.787  83.975  o  ?  ?  ?  ?
    3  11   9   4.034   2.164  ?  16.275   4.684  68.019  <  ?  ?  ?  ?
    3  11  10  17.281  15.845  ? 298.642 251.066  95.544  o  ?  ?  ?  ?
    3  11  11  15.183  12.880  ? 230.522 165.883 150.785  o  ?  ?  ?  ?
    3  12  -7   6.784   2.270  ?  46.017   5.151  94.354  <  ?  ?  ?  ?
    3  12  -6  18.290  17.112  ? 334.536 292.830 124.988  o  ?  ?  ?  ?
    3  12  -5  18.543  17.220  ? 343.842 296.542 122.271  o  ?  ?  ?  ?
    3  12  -4  30.415  28.411  ? 925.058 807.174 192.317  o  ?  ?  ?  ?
    3  12  -3  14.857  14.311  ? 220.722 204.807  65.030  o  ?  ?  ?  ?
    3  12  -2   7.942   7.914  ?  63.080  62.627  51.967  <  ?  ?  ?  ?
    3  12  -1  12.931  14.090  ? 167.221 198.528  51.967  o  ?  ?  ?  ?
    3  12   0  31.610  30.728  ? 999.203 944.190 133.318  o  ?  ?  ?  ?
    3  12   1  15.335  17.658  ? 235.154 311.797 129.119  o  ?  ?  ?  ?
    3  12   2    .223   5.103  ?    .050  26.037 104.087  <  ?  ?  ?  ?
    3  12   3  10.200   8.509  ? 104.033  72.406 107.861  <  ?  ?  ?  ?
    3  12   4  29.645  27.871  ? 878.832 776.781 185.599  o  ?  ?  ?  ?
    3  12   5  16.139  16.854  ? 260.471 284.071 127.735  o  ?  ?  ?  ?
    3  12   6  15.120  13.444  ? 228.603 180.729 134.733  o  ?  ?  ?  ?
    3  12   7   4.050   6.477  ?  16.403  41.946 123.625  <  ?  ?  ?  ?
    3  12   8  13.448  17.097  ? 180.845 292.318 146.317  o  ?  ?  ?  ?
    3  13  -2  19.031  19.111  ? 362.160 365.223 423.862  o  ?  ?  ?  ?
    3  13  -1   7.546  15.065  ?  56.949 226.942 333.663  <  ?  ?  ?  ?
    3  13   0    .016   2.207  ?    .000   4.870 301.024  <  ?  ?  ?  ?
    4   0 -22  30.874  27.228  ? 953.176 741.350 413.860  o  ?  ?  ?  ?
    4   0 -20  12.774  16.521  ? 163.186 272.952 107.861  o  ?  ?  ?  ?
    4   0 -18  85.554  77.012  ? 7319.49 5930.92 732.441  o  ?  ?  ?  ?
    4   0 -16   2.838   1.351  ?   8.051   1.824  57.386  <  ?  ?  ?  ?
    4   0 -14 115.140 110.561  ? 13257.3 12223.6 588.229  o  ?  ?  ?  ?
    4   0 -12   1.554   9.470  ?   2.414  89.677  18.814  <  ?  ?  ?  ?
    4   0 -10 132.184 123.693  ? 17472.7 15300.0 664.645  o  ?  ?  ?  ?
    4   0  -8 123.603 117.846  ? 15277.7 13887.7 497.223  o  ?  ?  ?  ?
    4   0  -6  91.499  90.814  ? 8372.08 8247.22 170.920  o  ?  ?  ?  ?
    4   0  -4 182.045 192.280  ? 33140.4 36971.5 5812.92  o  ?  ?  ?  ?
    4   0  -2   9.550   7.129  ?  91.210  50.824   5.677  o  ?  ?  ?  ?
    4   0   0 154.648 163.458  ? 23916.0 26718.4 553.206  o  ?  ?  ?  ?
    4   0   2  65.372  63.108  ? 4273.52 3982.65 101.609  o  ?  ?  ?  ?
    4   0   4 222.182 224.116  ? 49364.9 50228.1 2903.37  o  ?  ?  ?  ?
    4   0   6 105.930 107.798  ? 11221.1 11620.3 296.800  o  ?  ?  ?  ?
    4   0   8 142.035 131.892  ? 20173.9 17395.4 1685.40  o  ?  ?  ?  ?
    4   0  10  89.089  91.925  ? 7936.91 8450.17 403.977  o  ?  ?  ?  ?
    4   0  12  22.922  28.705  ? 525.438 823.994  54.643  o  ?  ?  ?  ?
    4   0  14  62.116  70.793  ? 3858.35 5011.67 284.304  o  ?  ?  ?  ?
    4   0  16   3.612   6.875  ?  13.050  47.261 101.609  <  ?  ?  ?  ?
    4   0  18  54.675  54.256  ? 2989.38 2943.76 451.985  o  ?  ?  ?  ?
    4   0  20  15.705  16.984  ? 246.655 288.461 161.470  o  ?  ?  ?  ?
    4   0  22  23.727  26.932  ? 562.953 725.325 870.682  o  ?  ?  ?  ?
    4   1 -23   8.866   6.367  ?  78.610  40.542 146.317  <  ?  ?  ?  ?
    4   1 -22  20.204  18.565  ? 408.194 344.671 100.381  o  ?  ?  ?  ?
    4   1 -21   6.945   7.778  ?  48.237  60.490  73.151  <  ?  ?  ?  ?
    4   1 -20  48.711  44.730  ? 2372.75 2000.81 206.111  o  ?  ?  ?  ?
    4   1 -19   7.954   5.114  ?  63.273  26.153  51.967  <  ?  ?  ?  ?
    4   1 -18  13.428  13.055  ? 180.300 170.433  45.160  o  ?  ?  ?  ?
    4   1 -17  11.234   9.907  ? 126.210  98.151  34.396  o  ?  ?  ?  ?
    4   1 -16  92.995  85.248  ? 8647.98 7267.29 556.083  o  ?  ?  ?  ?
    4   1 -15   6.300   1.717  ?  39.693   2.947  30.231  <  ?  ?  ?  ?
    4   1 -14   -.627    .546  ?    .394    .298  11.290  <  ?  ?  ?  ?
    4   1 -13   7.076  10.488  ?  50.069 110.006   7.897  o  ?  ?  ?  ?
    4   1 -12 100.549  94.922  ? 10110.1 9010.10 235.132  o  ?  ?  ?  ?
    4   1 -11  23.534  21.616  ? 553.831 467.256  14.813  o  ?  ?  ?  ?
    4   1 -10  82.583  81.179  ? 6819.87 6590.08 185.599  o  ?  ?  ?  ?
    4   1  -9  16.974  18.129  ? 288.126 328.654  10.883  o  ?  ?  ?  ?
    4   1  -8 122.428 120.616  ? 14988.6 14548.3 224.025  o  ?  ?  ?  ?
    4   1  -7  15.327  18.708  ? 234.918 350.007   6.901  o  ?  ?  ?  ?
    4   1  -6 164.800 160.459  ? 27159.1 25747.2 431.443  o  ?  ?  ?  ?
    4   1  -5   5.651   9.314  ?  31.929  86.750   2.721  o  ?  ?  ?  ?
    4   1  -4  84.725  83.955  ? 7178.31 7048.42  53.744  o  ?  ?  ?  ?
    4   1  -3   6.477   6.875  ?  41.956  47.262   1.646  o  ?  ?  ?  ?
    4   1  -2 163.088 168.113  ? 26597.7 28262.1 556.083  o  ?  ?  ?  ?
    4   1  -1  33.754  37.848  ? 1139.36 1432.46   6.901  o  ?  ?  ?  ?
    4   1   0  26.842  25.271  ? 720.484 638.631   5.972  o  ?  ?  ?  ?
    4   1   1   3.514   9.480  ?  12.348  89.869   2.523  <  ?  ?  ?  ?
    4   1   2 186.994 194.932  ? 34966.7 37998.3 940.530  o  ?  ?  ?  ?
    4   1   3  27.034  28.635  ? 730.852 819.962  11.290  o  ?  ?  ?  ?
    4   1   4  93.435  96.916  ? 8730.02 9392.62 185.599  o  ?  ?  ?  ?
    4   1   5  40.079  41.798  ? 1606.31 1747.11  25.711  o  ?  ?  ?  ?
    4   1   6 147.338 146.827  ? 21708.5 21558.3 696.519  o  ?  ?  ?  ?
    4   1   7  39.285  37.431  ? 1543.29 1401.09  26.334  o  ?  ?  ?  ?
    4   1   8  88.009  88.557  ? 7745.66 7842.37 116.926  o  ?  ?  ?  ?
    4   1   9   7.120   6.577  ?  50.700  43.260   7.558  o  ?  ?  ?  ?
    4   1  10  76.630  76.399  ? 5872.16 5836.74 127.735  o  ?  ?  ?  ?
    4   1  11   4.325   9.997  ?  18.708  99.936  10.092  <  ?  ?  ?  ?
    4   1  12  99.918 102.713  ? 9983.68 10550.0 544.618  o  ?  ?  ?  ?
    4   1  13   3.884   4.904  ?  15.083  24.051  22.128  <  ?  ?  ?  ?
    4   1  14  14.013  16.746  ? 196.361 280.429  31.589  o  ?  ?  ?  ?
    4   1  15   7.437  15.531  ?  55.304 241.224  28.902  <  ?  ?  ?  ?
    4   1  16  65.351  66.061  ? 4270.74 4364.11 211.407  o  ?  ?  ?  ?
    4   1  17   2.202   7.505  ?   4.847  56.318  46.817  <  ?  ?  ?  ?
    4   1  18   7.081   8.649  ?  50.137  74.803  51.090  <  ?  ?  ?  ?
    4   1  19    .216   2.324  ?    .047   5.401  58.316  <  ?  ?  ?  ?
    4   1  20  37.568  39.946  ? 1411.37 1595.72 182.284  o  ?  ?  ?  ?
    4   1  21   3.660   4.553  ?  13.396  20.734  64.048  <  ?  ?  ?  ?
    4   1  22  14.590  16.702  ? 212.869 278.970 585.269  <  ?  ?  ?  ?
    4   2 -23   1.146   8.215  ?   1.313  67.493 333.663  <  ?  ?  ?  ?
    4   2 -22  25.797  25.477  ? 665.510 649.059 123.625  o  ?  ?  ?  ?
    4   2 -21   6.439   5.447  ?  41.466  29.669  68.019  <  ?  ?  ?  ?
    4   2 -20  19.109  16.406  ? 365.145 269.162  77.391  o  ?  ?  ?  ?
    4   2 -19  19.780  18.258  ? 391.251 333.352  67.015  o  ?  ?  ?  ?
    4   2 -18  55.077  53.365  ? 3033.53 2847.82 329.214  o  ?  ?  ?  ?
    4   2 -17  20.418  19.733  ? 416.886 389.376  74.200  o  ?  ?  ?  ?
    4   2 -16   5.127   4.631  ?  26.284  21.443  49.358  <  ?  ?  ?  ?
    4   2 -15  16.038  13.442  ? 257.229 180.682  25.711  o  ?  ?  ?  ?
    4   2 -14  69.480  64.341  ? 4827.49 4139.78 303.148  o  ?  ?  ?  ?
    4   2 -13  25.465  24.739  ? 648.467 612.015  28.249  o  ?  ?  ?  ?
    4   2 -12  46.001  45.755  ? 2116.09 2093.53  35.844  o  ?  ?  ?  ?
    4   2 -11  29.238  29.154  ? 854.837 849.949  13.888  o  ?  ?  ?  ?
    4   2 -10 122.319 121.473  ? 14962.0 14755.6 244.594  o  ?  ?  ?  ?
    4   2  -9  41.318  40.597  ? 1707.21 1648.11  24.487  o  ?  ?  ?  ?
    4   2  -8 111.228 114.286  ? 12371.8 13061.3 324.795  o  ?  ?  ?  ?
    4   2  -7  16.063  11.824  ? 258.012 139.816   6.584  o  ?  ?  ?  ?
    4   2  -6 120.639 119.030  ? 14553.7 14168.1 389.377  o  ?  ?  ?  ?
    4   2  -5  45.284  46.040  ? 2050.67 2119.64  22.128  o  ?  ?  ?  ?
    4   2  -4 150.290 151.801  ? 22587.1 23043.4 320.406  o  ?  ?  ?  ?
    4   2  -3  68.328  68.847  ? 4668.68 4739.91 126.357  o  ?  ?  ?  ?
    4   2  -2  41.154  43.618  ? 1693.61 1902.49  23.886  o  ?  ?  ?  ?
    4   2  -1  45.121  43.592  ? 2035.92 1900.22  14.347  o  ?  ?  ?  ?
    4   2   0 187.379 184.673  ? 35111.0 34104.0 680.489  o  ?  ?  ?  ?
    4   2   1  70.162  74.439  ? 4922.74 5541.21  42.730  o  ?  ?  ?  ?
    4   2   2  39.942  42.233  ? 1595.40 1783.60  15.769  o  ?  ?  ?  ?
    4   2   3  40.831  41.647  ? 1667.15 1734.43  18.288  o  ?  ?  ?  ?
    4   2   4 220.345 219.157  ? 48551.9 48029.7 925.601  o  ?  ?  ?  ?
    4   2   5 139.856 140.652  ? 19559.6 19783.0 502.687  o  ?  ?  ?  ?
    4   2   6  57.880  59.615  ? 3350.15 3553.91  42.730  o  ?  ?  ?  ?
    4   2   7  39.811  42.344  ? 1584.89 1793.05  21.557  o  ?  ?  ?  ?
    4   2   8  85.059  86.388  ? 7235.04 7462.87  90.827  o  ?  ?  ?  ?
    4   2   9  49.530  45.061  ? 2453.18 2030.47  49.358  o  ?  ?  ?  ?
    4   2  10 106.511 106.697  ? 11344.6 11384.2 322.597  o  ?  ?  ?  ?
    4   2  11   6.818   5.309  ?  46.491  28.188  11.290  o  ?  ?  ?  ?
    4   2  12  37.428  34.613  ? 1400.83 1198.03  45.160  o  ?  ?  ?  ?
    4   2  13  22.321  25.843  ? 498.208 667.857  36.579  o  ?  ?  ?  ?
    4   2  14 103.860  98.289  ? 10786.9 9660.66 1187.20  o  ?  ?  ?  ?
    4   2  15  19.103  20.956  ? 364.926 439.144  41.935  o  ?  ?  ?  ?
    4   2  16  10.216  12.647  ? 104.367 159.957  35.116  o  ?  ?  ?  ?
    4   2  17  12.522  13.652  ? 156.802 186.387  37.322  o  ?  ?  ?  ?
    4   2  18  46.870  50.792  ? 2196.83 2579.80 136.154  o  ?  ?  ?  ?
    4   2  19  15.027  16.850  ? 225.802 283.929  65.030  o  ?  ?  ?  ?
    4   2  20   8.944  11.659  ?  80.001 135.937  72.110  <  ?  ?  ?  ?
    4   2  21    .198   3.942  ?    .039  15.541  65.030  <  ?  ?  ?  ?
    4   3 -22  14.592  16.042  ? 212.920 257.353  74.200  o  ?  ?  ?  ?
    4   3 -21  15.533  16.641  ? 241.272 276.920  61.148  o  ?  ?  ?  ?
    4   3 -20  27.152  28.325  ? 737.231 802.299  65.030  o  ?  ?  ?  ?
    4   3 -19   9.799  10.540  ?  96.030 111.087  35.116  o  ?  ?  ?  ?
    4   3 -18   8.247   4.332  ?  68.019  18.767  40.367  <  ?  ?  ?  ?
    4   3 -17  28.228  27.693  ? 796.813 766.929  65.030  o  ?  ?  ?  ?
    4   3 -16  55.761  55.535  ? 3109.27 3084.12 170.920  o  ?  ?  ?  ?
    4   3 -15  34.568  34.737  ? 1194.95 1206.64  51.967  o  ?  ?  ?  ?
    4   3 -14  19.822  17.931  ? 392.894 321.529  23.886  o  ?  ?  ?  ?
    4   3 -13  32.191  33.035  ? 1036.27 1091.31  37.322  o  ?  ?  ?  ?
    4   3 -12  77.126  76.893  ? 5948.35 5912.56 190.626  o  ?  ?  ?  ?
    4   3 -11  56.037  58.676  ? 3140.17 3442.83 112.996  o  ?  ?  ?  ?
    4   3 -10  69.404  66.792  ? 4816.95 4461.15 102.845  o  ?  ?  ?  ?
    4   3  -9   -.268    .801  ?    .072    .641   5.389  <  ?  ?  ?  ?
    4   3  -8 110.406 112.213  ? 12189.5 12591.8 252.297  o  ?  ?  ?  ?
    4   3  -7  81.709  87.221  ? 6676.42 7607.56 122.271  o  ?  ?  ?  ?
    4   3  -6 119.247 129.981  ? 14219.7 16895.2 382.178  o  ?  ?  ?  ?
    4   3  -5  33.823  33.814  ? 1143.97 1143.40  13.436  o  ?  ?  ?  ?
    4   3  -4  70.524  74.423  ? 4973.62 5538.76  50.221  o  ?  ?  ?  ?
    4   3  -3 126.353 127.495  ? 15965.2 16255.0 475.665  o  ?  ?  ?  ?
    4   3  -2 135.763 136.899  ? 18431.6 18741.2 200.882  o  ?  ?  ?  ?
    4   3  -1  43.111  42.053  ? 1858.56 1768.43  36.579  o  ?  ?  ?  ?
    4   3   0  23.333  25.812  ? 544.413 666.276   8.961  o  ?  ?  ?  ?
    4   3   1  62.289  64.149  ? 3879.94 4115.06  35.844  o  ?  ?  ?  ?
    4   3   2 138.415 137.278  ? 19158.8 18845.1 335.898  o  ?  ?  ?  ?
    4   3   3  75.732  76.035  ? 5735.35 5781.35  47.656  o  ?  ?  ?  ?
    4   3   4  67.170  67.699  ? 4511.85 4583.13  42.730  o  ?  ?  ?  ?
    4   3   5  15.612  16.947  ? 243.723 287.190   6.901  o  ?  ?  ?  ?
    4   3   6 157.817 151.065  ? 24906.1 22820.5 547.473  o  ?  ?  ?  ?
    4   3   7  99.859  99.122  ? 9971.76 9825.20 156.846  o  ?  ?  ?  ?
    4   3   8  82.481  87.857  ? 6803.06 7718.78 140.465  o  ?  ?  ?  ?
    4   3   9   5.287   5.370  ?  27.957  28.840   8.599  <  ?  ?  ?  ?
    4   3  10  52.678  54.504  ? 2774.98 2970.72  71.076  o  ?  ?  ?  ?
    4   3  11  57.939  52.601  ? 3356.93 2766.91 112.996  o  ?  ?  ?  ?
    4   3  12 101.775 100.848  ? 10358.1 10170.3 674.129  o  ?  ?  ?  ?
    4   3  13   8.605   7.789  ?  74.045  60.667  18.288  o  ?  ?  ?  ?
    4   3  14  26.933  27.104  ? 725.375 734.625  45.984  o  ?  ?  ?  ?
    4   3  15  29.129  30.101  ? 848.472 906.081  54.643  o  ?  ?  ?  ?
    4   3  16  56.540  58.267  ? 3196.76 3395.08 282.248  o  ?  ?  ?  ?
    4   3  17  27.503  29.252  ? 756.429 855.684  63.074  o  ?  ?  ?  ?
    4   3  18    .317   4.092  ?    .101  16.744  38.072  <  ?  ?  ?  ?
    4   3  19   6.561  12.578  ?  43.052 158.206  42.730  <  ?  ?  ?  ?
    4   3  20  31.551  33.207  ? 995.455 1102.69 118.251  o  ?  ?  ?  ?
    4   3  21  11.642  14.741  ? 135.544 217.301  80.649  o  ?  ?  ?  ?
    4   4 -21    .301   3.629  ?    .091  13.166  45.160  <  ?  ?  ?  ?
    4   4 -20   8.503   9.181  ?  72.301  84.294  38.072  <  ?  ?  ?  ?
    4   4 -19  26.461  28.306  ? 700.164 801.203  76.320  o  ?  ?  ?  ?
    4   4 -18  32.726  31.736  ? 1070.99 1007.20  96.742  o  ?  ?  ?  ?
    4   4 -17  14.194  22.917  ? 201.456 525.189 294.698  <  ?  ?  ?  ?
    4   4 -16    .089   2.484  ?    .008   6.168  23.886  <  ?  ?  ?  ?
    4   4 -15  23.345  27.338  ? 544.979 747.380  39.595  o  ?  ?  ?  ?
    4   4 -14  57.862  60.699  ? 3347.98 3684.34 262.094  o  ?  ?  ?  ?
    4   4 -13  51.835  51.431  ? 2686.90 2645.12 167.740  o  ?  ?  ?  ?
    4   4 -12  38.488  39.452  ? 1481.35 1556.50  89.666  o  ?  ?  ?  ?
    4   4 -11  18.479  19.555  ? 341.471 382.390  18.288  o  ?  ?  ?  ?
    4   4 -10  70.280  71.556  ? 4939.35 5120.24 199.154  o  ?  ?  ?  ?
    4   4  -9  93.315  96.299  ? 8707.64 9273.49 615.201  o  ?  ?  ?  ?
    4   4  -8  65.528  67.542  ? 4293.95 4561.93 116.926  o  ?  ?  ?  ?
    4   4  -7   -.248   1.407  ?    .062   1.980   6.901  <  ?  ?  ?  ?
    4   4  -6  52.924  52.550  ? 2801.00 2761.50  42.730  o  ?  ?  ?  ?
    4   4  -5  89.141  96.859  ? 7946.05 9381.66  99.161  o  ?  ?  ?  ?
    4   4  -4 128.076 127.814  ? 16403.5 16336.4 313.878  o  ?  ?  ?  ?
    4   4  -3  22.571  23.803  ? 509.466 566.569   8.244  o  ?  ?  ?  ?
    4   4  -2  40.934  41.240  ? 1675.57 1700.77  18.814  o  ?  ?  ?  ?
    4   4  -1  79.086  83.704  ? 6254.63 7006.37 118.251  o  ?  ?  ?  ?
    4   4   0 138.585 134.568  ? 19205.8 18108.5 290.518  o  ?  ?  ?  ?
    4   4   1  47.464  46.875  ? 2252.80 2197.25  19.889  o  ?  ?  ?  ?
    4   4   2   8.749   9.176  ?  76.541  84.196   3.587  o  ?  ?  ?  ?
    4   4   3  56.948  60.872  ? 3243.04 3705.43  29.563  o  ?  ?  ?  ?
    4   4   4  77.034  76.953  ? 5934.20 5921.84  75.256  o  ?  ?  ?  ?
    4   4   5  61.803  61.812  ? 3819.58 3820.75  34.396  o  ?  ?  ?  ?
    4   4   6  61.106  61.219  ? 3733.91 3747.82  53.744  o  ?  ?  ?  ?
    4   4   7  10.163  15.005  ? 103.278 225.148   9.331  o  ?  ?  ?  ?
    4   4   8  65.177  67.474  ? 4248.03 4552.70 101.609  o  ?  ?  ?  ?
    4   4   9  65.639  67.387  ? 4308.50 4541.04 163.026  o  ?  ?  ?  ?
    4   4  10  87.780  87.174  ? 7705.25 7599.37 324.795  o  ?  ?  ?  ?
    4   4  11   9.363  10.644  ?  87.674 113.288  14.347  o  ?  ?  ?  ?
    4   4  12  35.588  39.440  ? 1266.49 1555.54  58.316  o  ?  ?  ?  ?
    4   4  13  51.152  50.101  ? 2616.50 2510.08  91.995  o  ?  ?  ?  ?
    4   4  14  51.183  52.294  ? 2619.72 2734.62 190.626  o  ?  ?  ?  ?
    4   4  15  31.395  31.531  ? 985.647 994.207  64.048  o  ?  ?  ?  ?
    4   4  16   1.365   5.395  ?   1.863  29.105  31.589  <  ?  ?  ?  ?
    4   4  17  26.829  27.999  ? 719.814 783.951  62.108  o  ?  ?  ?  ?
    4   4  18  33.271  33.015  ? 1106.93 1090.01 111.701  o  ?  ?  ?  ?
    4   4  19  19.953  22.286  ? 398.122 496.675  60.197  o  ?  ?  ?  ?
    4   4  20   7.496   8.691  ?  56.185  75.535  58.316  <  ?  ?  ?  ?
    4   4  21  10.453   8.936  ? 109.271  79.847 561.861  <  ?  ?  ?  ?
    4   5 -20  21.380  21.174  ? 457.118 448.359 188.943  o  ?  ?  ?  ?
    4   5 -19  12.137  13.581  ? 147.301 184.447 123.625  o  ?  ?  ?  ?
    4   5 -18   4.495   5.447  ?  20.201  29.672  45.984  <  ?  ?  ?  ?
    4   5 -17  27.923  30.630  ? 779.678 938.212  87.367  o  ?  ?  ?  ?
    4   5 -16  41.286  41.339  ? 1704.55 1708.94 143.376  o  ?  ?  ?  ?
    4   5 -15  38.513  41.593  ? 1483.27 1729.96 120.923  o  ?  ?  ?  ?
    4   5 -14   4.738   1.372  ?  22.449   1.881  23.886  <  ?  ?  ?  ?
    4   5 -13  26.582  29.180  ? 706.602 851.457  45.160  o  ?  ?  ?  ?
    4   5 -12  52.523  54.562  ? 2758.70 2977.03 164.590  o  ?  ?  ?  ?
    4   5 -11  75.676  77.619  ? 5726.86 6024.66 274.097  o  ?  ?  ?  ?
    4   5 -10  26.663  29.659  ? 710.927 879.663  30.231  o  ?  ?  ?  ?
    4   5  -9  13.982  15.369  ? 195.488 236.208  15.287  o  ?  ?  ?  ?
    4   5  -8  48.956  48.194  ? 2396.65 2322.71  64.048  o  ?  ?  ?  ?
    4   5  -7 118.012 120.348  ? 13926.8 14483.6 329.214  o  ?  ?  ?  ?
    4   5  -6  60.803  60.777  ? 3697.02 3693.89  80.649  o  ?  ?  ?  ?
    4   5  -5    .974   4.116  ?    .948  16.941   6.274  <  ?  ?  ?  ?
    4   5  -4   9.801   8.544  ?  96.062  72.992   8.599  o  ?  ?  ?  ?
    4   5  -3 113.542 113.178  ? 12891.8 12809.3 213.187  o  ?  ?  ?  ?
    4   5  -2 132.284 131.910  ? 17498.9 17400.3 793.171  o  ?  ?  ?  ?
    4   5  -1  57.245  56.266  ? 3276.96 3165.84  75.256  o  ?  ?  ?  ?
    4   5   0  20.427  23.710  ? 417.254 562.168  11.704  o  ?  ?  ?  ?
    4   5   1  74.457  71.922  ? 5543.85 5172.71  77.391  o  ?  ?  ?  ?
    4   5   2  90.861  87.276  ? 8255.75 7617.14 101.609  o  ?  ?  ?  ?
    4   5   3  86.461  84.478  ? 7475.44 7136.45 102.845  o  ?  ?  ?  ?
    4   5   4  19.983  23.466  ? 399.301 550.656   7.558  o  ?  ?  ?  ?
    4   5   5  21.719  23.354  ? 471.722 545.412   9.331  o  ?  ?  ?  ?
    4   5   6  71.832  74.963  ? 5159.82 5619.48  88.513  o  ?  ?  ?  ?
    4   5   7  98.425  95.601  ? 9687.45 9139.58 225.858  o  ?  ?  ?  ?
    4   5   8  56.651  56.071  ? 3209.32 3143.95  79.556  o  ?  ?  ?  ?
    4   5   9  15.505  13.797  ? 240.397 190.371  15.287  o  ?  ?  ?  ?
    4   5  10  26.014  27.349  ? 676.730 747.983  28.249  o  ?  ?  ?  ?
    4   5  11  66.292  67.077  ? 4394.67 4499.37 146.317  o  ?  ?  ?  ?
    4   5  12  36.970  36.347  ? 1366.78 1321.08  51.090  o  ?  ?  ?  ?
    4   5  13  27.865  30.464  ? 776.441 928.058  37.322  o  ?  ?  ?  ?
    4   5  14   3.125   7.011  ?   9.764  49.160  19.348  <  ?  ?  ?  ?
    4   5  15  42.017  43.486  ? 1765.42 1891.06 158.380  o  ?  ?  ?  ?
    4   5  16  29.088  28.652  ? 846.106 820.963  62.108  o  ?  ?  ?  ?
    4   5  17  30.310  33.120  ? 918.700 1096.91  71.076  o  ?  ?  ?  ?
    4   5  18   8.334   6.166  ?  69.454  38.017  45.160  <  ?  ?  ?  ?
    4   5  19  17.383  15.677  ? 302.174 245.762  59.252  o  ?  ?  ?  ?
    4   5  20  19.674  18.609  ? 387.068 346.305  88.513  o  ?  ?  ?  ?
    4   5  21  12.886  18.360  ? 166.039 337.082 331.434  <  ?  ?  ?  ?
    4   6 -19  26.318  26.318  ? 692.654 692.624 222.200  o  ?  ?  ?  ?
    4   6 -18  20.127  19.592  ? 405.092 383.839  74.200  o  ?  ?  ?  ?
    4   6 -17  20.975  21.031  ? 439.943 442.298  71.076  o  ?  ?  ?  ?
    4   6 -16   2.871   5.660  ?   8.241  32.040  35.116  <  ?  ?  ?  ?
    4   6 -15  26.599  27.834  ? 707.515 774.754  71.076  o  ?  ?  ?  ?
    4   6 -14  36.317  37.086  ? 1318.95 1375.40 107.861  o  ?  ?  ?  ?
    4   6 -13  59.589  65.423  ? 3550.84 4280.13 237.010  o  ?  ?  ?  ?
    4   6 -12   8.243  10.830  ?  67.942 117.279  30.231  <  ?  ?  ?  ?
    4   6 -11  19.272  23.066  ? 371.402 532.046  45.984  o  ?  ?  ?  ?
    4   6 -10  32.857  36.347  ? 1079.56 1321.07  81.750  o  ?  ?  ?  ?
    4   6  -9  76.399  81.445  ? 5836.85 6633.37 264.076  o  ?  ?  ?  ?
    4   6  -8  16.669  15.706  ? 277.846 246.691  29.563  o  ?  ?  ?  ?
    4   6  -7   8.212   3.977  ?  67.438  15.819  14.813  o  ?  ?  ?  ?
    4   6  -6  23.467  26.319  ? 550.689 692.692  25.711  o  ?  ?  ?  ?
    4   6  -5  89.845  86.978  ? 8072.06 7565.25 264.076  o  ?  ?  ?  ?
    4   6  -4  40.653  44.349  ? 1652.70 1966.83  42.730  o  ?  ?  ?  ?
    4   6  -3  52.961  52.857  ? 2804.90 2793.83  71.076  o  ?  ?  ?  ?
    4   6  -2   3.557   1.320  ?  12.655   1.741  13.888  <  ?  ?  ?  ?
    4   6  -1 108.644 107.382  ? 11803.4 11530.8 270.066  o  ?  ?  ?  ?
    4   6   0  70.872  75.229  ? 5022.78 5659.36 124.988  o  ?  ?  ?  ?
    4   6   1 100.022  99.172  ? 10004.5 9835.13 211.407  o  ?  ?  ?  ?
    4   6   2  14.113  15.832  ? 199.174 250.644  11.704  o  ?  ?  ?  ?
    4   6   3  50.035  48.262  ? 2503.53 2329.25  47.656  o  ?  ?  ?  ?
    4   6   4  57.624  55.856  ? 3320.51 3119.93  64.048  o  ?  ?  ?  ?
    4   6   5  97.253  97.154  ? 9458.05 9438.93 195.720  o  ?  ?  ?  ?
    4   6   6  16.459  19.185  ? 270.887 368.072  15.287  o  ?  ?  ?  ?
    4   6   7   3.685   5.352  ?  13.578  28.644  11.704  <  ?  ?  ?  ?
    4   6   8  36.891  37.867  ? 1360.92 1433.92  40.367  o  ?  ?  ?  ?
    4   6   9  86.216  84.867  ? 7433.28 7202.44 288.440  o  ?  ?  ?  ?
    4   6  10  28.755  28.658  ? 826.826 821.272  32.978  o  ?  ?  ?  ?
    4   6  11  15.448  18.644  ? 238.636 347.592  19.889  o  ?  ?  ?  ?
    4   6  12  11.847  10.345  ? 140.354 107.016  20.438  o  ?  ?  ?  ?
    4   6  13  56.422  55.594  ? 3183.49 3090.68 150.785  o  ?  ?  ?  ?
    4   6  14  23.263  23.574  ? 541.165 555.715  34.396  o  ?  ?  ?  ?
    4   6  15  29.563  29.415  ? 873.942 865.261  47.656  o  ?  ?  ?  ?
    4   6  16   4.443   3.422  ?  19.740  11.711  30.231  <  ?  ?  ?  ?
    4   6  17  23.773  23.015  ? 565.159 529.692  53.744  o  ?  ?  ?  ?
    4   6  18  14.035  16.224  ? 196.988 263.229  44.342  o  ?  ?  ?  ?
    4   6  19  25.181  26.589  ? 634.102 706.964  87.367  o  ?  ?  ?  ?
    4   6  20  15.003   6.022  ? 225.091  36.269 426.382  <  ?  ?  ?  ?
    4   7 -19  17.142  15.378  ? 293.838 236.491 155.319  o  ?  ?  ?  ?
    4   7 -18   7.065   5.280  ?  49.916  27.876  55.550  <  ?  ?  ?  ?
    4   7 -17  27.019  28.165  ? 730.043 793.288 104.087  o  ?  ?  ?  ?
    4   7 -16   9.490  11.618  ?  90.052 134.967  50.221  <  ?  ?  ?  ?
    4   7 -15  34.532  35.400  ? 1192.49 1253.16 115.609  o  ?  ?  ?  ?
    4   7 -14   1.428   1.475  ?   2.038   2.175  37.322  <  ?  ?  ?  ?
    4   7 -13  25.368  27.529  ? 643.527 757.840  74.200  o  ?  ?  ?  ?
    4   7 -12  21.932  23.654  ? 481.003 559.499  57.386  o  ?  ?  ?  ?
    4   7 -11  51.672  54.972  ? 2669.95 3021.87 183.938  o  ?  ?  ?  ?
    4   7 -10   6.090   7.559  ?  37.088  57.144  32.280  <  ?  ?  ?  ?
    4   7  -9   7.823   9.994  ?  61.203  99.879  27.603  <  ?  ?  ?  ?
    4   7  -8  20.834  20.890  ? 434.075 436.392  38.830  o  ?  ?  ?  ?
    4   7  -7  57.465  57.849  ? 3302.24 3346.56 114.299  o  ?  ?  ?  ?
    4   7  -6   -.829   1.614  ?    .687   2.603  14.347  <  ?  ?  ?  ?
    4   7  -5  48.994  52.550  ? 2400.44 2761.47  86.229  o  ?  ?  ?  ?
    4   7  -4   4.901   7.020  ?  24.021  49.284  16.754  <  ?  ?  ?  ?
    4   7  -3  84.321  88.999  ? 7109.98 7920.88 169.326  o  ?  ?  ?  ?
    4   7  -2  42.652  42.043  ? 1819.19 1767.64  55.550  o  ?  ?  ?  ?
    4   7  -1  69.290  71.028  ? 4801.09 5044.98 120.923  o  ?  ?  ?  ?
    4   7   0   3.838   5.065  ?  14.733  25.656  13.436  <  ?  ?  ?  ?
    4   7   1  73.080  72.829  ? 5340.73 5304.01 156.846  o  ?  ?  ?  ?
    4   7   2  32.756  31.019  ? 1072.97 962.184  38.830  o  ?  ?  ?  ?
    4   7   3  88.978  86.347  ? 7917.08 7455.76 209.634  o  ?  ?  ?  ?
    4   7   4   2.504    .969  ?   6.268    .939  15.769  <  ?  ?  ?  ?
    4   7   5  29.045  27.733  ? 843.630 769.138  48.504  o  ?  ?  ?  ?
    4   7   6  28.751  28.307  ? 826.604 801.274  51.090  o  ?  ?  ?  ?
    4   7   7  85.145  83.686  ? 7249.69 7003.32 408.904  o  ?  ?  ?  ?
    4   7   8  14.526  13.313  ? 210.992 177.244  19.889  o  ?  ?  ?  ?
    4   7   9   8.380   7.359  ?  70.223  54.160  18.288  o  ?  ?  ?  ?
    4   7  10  15.436  16.443  ? 238.265 270.363  23.293  o  ?  ?  ?  ?
    4   7  11  63.168  61.251  ? 3990.20 3751.74 153.800  o  ?  ?  ?  ?
    4   7  12  15.606  15.140  ? 243.562 229.223  28.902  o  ?  ?  ?  ?
    4   7  13  18.034  16.647  ? 325.242 277.133  31.589  o  ?  ?  ?  ?
    4   7  14   4.277   3.053  ?  18.296   9.322  25.711  <  ?  ?  ?  ?
    4   7  15  29.863  30.911  ? 891.826 955.492  55.550  o  ?  ?  ?  ?
    4   7  16  10.500  11.936  ? 110.245 142.474  35.116  o  ?  ?  ?  ?
    4   7  17  25.366  25.249  ? 643.449 637.514  68.019  o  ?  ?  ?  ?
    4   7  18   5.419   5.576  ?  29.361  31.096  61.148  <  ?  ?  ?  ?
    4   8 -18    .168   3.926  ?    .028  15.413 124.988  <  ?  ?  ?  ?
    4   8 -17  17.203  18.250  ? 295.943 333.058  75.256  o  ?  ?  ?  ?
    4   8 -16   5.424   1.410  ?  29.417   1.988  50.221  <  ?  ?  ?  ?
    4   8 -15  26.514  29.153  ? 702.973 849.885  95.544  o  ?  ?  ?  ?
    4   8 -14    .266   4.467  ?    .071  19.958  46.817  <  ?  ?  ?  ?
    4   8 -13  44.029  46.086  ? 1938.54 2123.94 169.326  o  ?  ?  ?  ?
    4   8 -12   3.411   1.584  ?  11.632   2.508  38.830  <  ?  ?  ?  ?
    4   8 -11  16.591  17.291  ? 275.251 298.973  52.852  o  ?  ?  ?  ?
    4   8 -10   6.663   6.361  ?  44.397  40.461  37.322  <  ?  ?  ?  ?
    4   8  -9  59.313  60.784  ? 3518.05 3694.73 320.406  o  ?  ?  ?  ?
    4   8  -8    .162   3.530  ?    .026  12.460  31.589  <  ?  ?  ?  ?
    4   8  -7   8.520   8.935  ?  72.587  79.828  26.965  o  ?  ?  ?  ?
    4   8  -6    .203   2.678  ?    .041   7.169  19.348  <  ?  ?  ?  ?
    4   8  -5  78.125  75.914  ? 6103.48 5763.01 250.360  o  ?  ?  ?  ?
    4   8  -4  26.450  27.596  ? 699.577 761.529  42.730  o  ?  ?  ?  ?
    4   8  -3  49.879  48.587  ? 2487.91 2360.74 104.087  o  ?  ?  ?  ?
    4   8  -2  21.432  20.543  ? 459.312 422.002  28.902  o  ?  ?  ?  ?
    4   8  -1  77.635  78.115  ? 6027.23 6102.01 216.770  o  ?  ?  ?  ?
    4   8   0   7.127   7.963  ?  50.796  63.411  18.288  <  ?  ?  ?  ?
    4   8   1  81.044  78.611  ? 6568.16 6179.70 327.001  o  ?  ?  ?  ?
    4   8   2   7.688   5.705  ?  59.108  32.547  19.348  o  ?  ?  ?  ?
    4   8   3  42.260  41.142  ? 1785.87 1692.68  64.048  o  ?  ?  ?  ?
    4   8   4   7.094   4.181  ?  50.321  17.483  30.231  <  ?  ?  ?  ?
    4   8   5  81.814  78.101  ? 6693.56 6099.79 418.846  o  ?  ?  ?  ?
    4   8   6  11.696  12.971  ? 136.787 168.245  32.280  o  ?  ?  ?  ?
    4   8   7  13.293  16.497  ? 176.711 272.139  32.280  o  ?  ?  ?  ?
    4   8   8   8.968  10.408  ?  80.431 108.336  30.231  o  ?  ?  ?  ?
    4   8   9  67.355  67.135  ? 4536.67 4507.09 489.083  o  ?  ?  ?  ?
    4   8  10  10.501   8.947  ? 110.263  80.040  43.532  o  ?  ?  ?  ?
    4   8  11  11.384  11.272  ? 129.601 127.054  41.935  o  ?  ?  ?  ?
    4   8  12   7.924   4.266  ?  62.789  18.197  28.902  <  ?  ?  ?  ?
    4   8  13  46.720  45.620  ? 2182.80 2081.21 131.911  o  ?  ?  ?  ?
    4   8  14   4.304   7.062  ?  18.521  49.866  34.396  <  ?  ?  ?  ?
    4   8  15  18.596  18.541  ? 345.807 343.756  47.656  o  ?  ?  ?  ?
    4   8  16   4.034   1.964  ?  16.270   3.856  41.148  <  ?  ?  ?  ?
    4   8  17  17.839  20.352  ? 318.240 414.195 136.154  o  ?  ?  ?  ?
    4   9 -15  24.341  24.600  ? 592.491 605.142  93.171  o  ?  ?  ?  ?
    4   9 -14   6.969   2.993  ?  48.570   8.961  57.386  <  ?  ?  ?  ?
    4   9 -13  20.709  20.613  ? 428.868 424.881  74.200  o  ?  ?  ?  ?
    4   9 -12   3.611    .457  ?  13.042    .209  51.967  <  ?  ?  ?  ?
    4   9 -11  49.882  50.903  ? 2488.23 2591.08 227.698  o  ?  ?  ?  ?
    4   9 -10   8.012   5.337  ?  64.191  28.485  51.967  <  ?  ?  ?  ?
    4   9  -9   7.108   7.767  ?  50.522  60.322  43.532  <  ?  ?  ?  ?
    4   9  -8   6.440   1.076  ?  41.470   1.157  47.656  <  ?  ?  ?  ?
    4   9  -7  63.855  63.893  ? 4077.41 4082.30 441.654  o  ?  ?  ?  ?
    4   9  -6   3.092   3.192  ?   9.561  10.188  25.095  <  ?  ?  ?  ?
    4   9  -5  10.213  11.154  ? 104.312 124.420  28.902  o  ?  ?  ?  ?
    4   9  -4   -.102   2.499  ?    .010   6.245  25.711  <  ?  ?  ?  ?
    4   9  -3  66.379  62.215  ? 4406.16 3870.73 209.634  o  ?  ?  ?  ?
    4   9  -2   -.104   1.619  ?    .011   2.622  25.711  <  ?  ?  ?  ?
    4   9  -1  54.991  54.103  ? 3024.00 2927.12 136.154  o  ?  ?  ?  ?
    4   9   0   8.391   4.719  ?  70.409  22.268  22.707  o  ?  ?  ?  ?
    4   9   1  55.340  55.744  ? 3062.47 3107.39 124.988  o  ?  ?  ?  ?
    4   9   2   7.621   9.232  ?  58.073  85.236  23.886  <  ?  ?  ?  ?
    4   9   3  67.011  69.403  ? 4490.43 4816.84 238.895  o  ?  ?  ?  ?
    4   9   4  11.340  11.567  ? 128.591 133.803  30.231  o  ?  ?  ?  ?
    4   9   5  20.947  22.172  ? 438.790 491.589  43.532  o  ?  ?  ?  ?
    4   9   6    .035   5.455  ?    .001  29.761  26.965  <  ?  ?  ?  ?
    4   9   7  59.331  57.355  ? 3520.12 3289.56 294.698  o  ?  ?  ?  ?
    4   9   8   -.091    .010  ?    .008    .000  33.683  <  ?  ?  ?  ?
    4   9   9    .117   2.897  ?    .014   8.394  35.844  <  ?  ?  ?  ?
    4   9  10   4.777   2.172  ?  22.820   4.717  42.730  <  ?  ?  ?  ?
    4   9  11  53.196  50.021  ? 2829.85 2502.05 272.078  o  ?  ?  ?  ?
    4   9  12   -.100   3.520  ?    .010  12.389  46.817  <  ?  ?  ?  ?
    4   9  13  17.488  17.362  ? 305.830 301.436  62.108  o  ?  ?  ?  ?
    4   9  14   -.058   2.291  ?    .003   5.250  53.744  <  ?  ?  ?  ?
    4   9  15  26.122  24.825  ? 682.374 616.263 187.267  o  ?  ?  ?  ?
    4   9  16    .071   1.954  ?    .005   3.817 126.357  <  ?  ?  ?  ?
    4  10 -13  25.748  26.978  ? 662.978 727.834 107.861  o  ?  ?  ?  ?
    4  10 -12   1.337    .945  ?   1.788    .894  61.148  <  ?  ?  ?  ?
    4  10 -11   8.912   8.827  ?  79.423  77.916  62.108  <  ?  ?  ?  ?
    4  10 -10    .305   6.365  ?    .093  40.515  50.221  <  ?  ?  ?  ?
    4  10  -9  44.619  43.632  ? 1990.87 1903.75 209.634  o  ?  ?  ?  ?
    4  10  -8   6.269   7.022  ?  39.302  49.311  56.464  <  ?  ?  ?  ?
    4  10  -7    .127   2.907  ?    .016   8.451  51.967  <  ?  ?  ?  ?
    4  10  -6    .246   8.452  ?    .061  71.429  34.396  <  ?  ?  ?  ?
    4  10  -5  56.144  55.702  ? 3152.19 3102.75 202.618  o  ?  ?  ?  ?
    4  10  -4  11.248  12.560  ? 126.511 157.759  35.844  o  ?  ?  ?  ?
    4  10  -3  18.798  18.608  ? 353.361 346.269  46.817  o  ?  ?  ?  ?
    4  10  -2    .103   5.632  ?    .011  31.716  32.280  <  ?  ?  ?  ?
    4  10  -1  45.429  44.746  ? 2063.83 2002.19 129.119  o  ?  ?  ?  ?
    4  10   0  13.446  13.606  ? 180.797 185.136  38.072  o  ?  ?  ?  ?
    4  10   1  39.359  39.635  ? 1549.11 1570.96  95.544  o  ?  ?  ?  ?
    4  10   2    .081    .519  ?    .007    .269  30.906  <  ?  ?  ?  ?
    4  10   3  25.808  25.540  ? 666.032 652.266  58.316  o  ?  ?  ?  ?
    4  10   4  12.280  12.767  ? 150.802 162.990  38.072  o  ?  ?  ?  ?
    4  10   5  42.272  41.463  ? 1786.91 1719.14 107.861  o  ?  ?  ?  ?
    4  10   6    .233   3.770  ?    .054  14.209  31.589  <  ?  ?  ?  ?
    4  10   7    .293   2.588  ?    .086   6.699  34.396  <  ?  ?  ?  ?
    4  10   8   9.000   9.529  ?  81.001  90.796  44.342  <  ?  ?  ?  ?
    4  10   9  44.197  41.558  ? 1953.35 1727.03 143.376  o  ?  ?  ?  ?
    4  10  10  10.702   9.792  ? 114.531  95.881  51.090  o  ?  ?  ?  ?
    4  10  11   7.496  10.870  ?  56.197 118.165  54.643  <  ?  ?  ?  ?
    4  10  12    .166   1.703  ?    .027   2.901  51.967  <  ?  ?  ?  ?
    4  10  13  28.092  25.397  ? 789.186 645.014 177.369  o  ?  ?  ?  ?
    4  11 -10  10.063   8.069  ? 101.266  65.103  81.750  <  ?  ?  ?  ?
    4  11  -9   4.014   3.354  ?  16.111  11.250  64.048  <  ?  ?  ?  ?
    4  11  -8   9.416   9.130  ?  88.667  83.357  76.320  <  ?  ?  ?  ?
    4  11  -7  35.005  35.651  ? 1225.32 1270.99 187.267  o  ?  ?  ?  ?
    4  11  -6  14.488  13.122  ? 209.911 172.187  96.742  o  ?  ?  ?  ?
    4  11  -5   7.330   4.731  ?  53.734  22.383  52.852  <  ?  ?  ?  ?
    4  11  -4   6.223   8.049  ?  38.731  64.789  40.367  <  ?  ?  ?  ?
    4  11  -3  38.492  37.913  ? 1481.60 1437.39 107.861  o  ?  ?  ?  ?
    4  11  -2  18.325  19.137  ? 335.789 366.242  52.852  o  ?  ?  ?  ?
    4  11  -1  21.654  20.611  ? 468.892 424.830  58.316  o  ?  ?  ?  ?
    4  11   0    .001   2.157  ?    .000   4.651  39.595  <  ?  ?  ?  ?
    4  11   1  24.966  24.392  ? 623.288 594.983  90.827  o  ?  ?  ?  ?
    4  11   2  13.345  14.970  ? 178.098 224.098  64.048  o  ?  ?  ?  ?
    4  11   3  36.210  32.259  ? 1311.13 1040.66 153.800  o  ?  ?  ?  ?
    4  11   4    .244   3.220  ?    .060  10.370  40.367  <  ?  ?  ?  ?
    4  11   5   8.027   9.700  ?  64.439  94.088  42.730  <  ?  ?  ?  ?
    4  11   6  14.365  14.321  ? 206.352 205.083  47.656  o  ?  ?  ?  ?
    4  11   7  34.389  31.904  ? 1182.64 1017.84 118.251  o  ?  ?  ?  ?
    4  11   8  10.570  11.708  ? 111.722 137.086  51.967  o  ?  ?  ?  ?
    4  11   9   6.103   2.393  ?  37.242   5.728  72.110  <  ?  ?  ?  ?
    4  11  10   8.360   6.253  ?  69.883  39.104 153.800  <  ?  ?  ?  ?
    4  12  -6  10.191  10.473  ? 103.848 109.693 280.199  <  ?  ?  ?  ?
    4  12  -5  28.501  26.480  ? 812.327 701.212 185.599  o  ?  ?  ?  ?
    4  12  -4  20.338  18.593  ? 413.633 345.691  85.098  o  ?  ?  ?  ?
    4  12  -3  11.419  12.077  ? 130.392 145.857  61.148  o  ?  ?  ?  ?
    4  12  -2   3.340   3.421  ?  11.154  11.705  49.358  <  ?  ?  ?  ?
    4  12  -1  24.140  22.914  ? 582.757 525.029  81.750  o  ?  ?  ?  ?
    4  12   0  17.549  16.853  ? 307.953 284.035  85.098  o  ?  ?  ?  ?
    4  12   1  22.759  21.168  ? 517.972 448.101  97.948  o  ?  ?  ?  ?
    4  12   2    .145   3.043  ?    .021   9.261  68.019  <  ?  ?  ?  ?
    4  12   3  12.898  14.017  ? 166.360 196.483  76.320  o  ?  ?  ?  ?
    4  12   4  15.230  15.366  ? 231.956 236.123 131.911  o  ?  ?  ?  ?
    4  12   5  31.850  26.474  ? 1014.44 700.873 588.229  o  ?  ?  ?  ?
    4  12   7    .130   3.711  ?    .017  13.775 153.800  <  ?  ?  ?  ?
    4  12   8   7.134  11.546  ?  50.895 133.303 204.360  <  ?  ?  ?  ?
    5   0 -21    .438   6.816  ?    .192  46.456 179.000  <  ?  ?  ?  ?
    5   0 -19  46.799  43.665  ? 2190.11 1906.67 467.705  o  ?  ?  ?  ?
    5   0 -17  37.281  36.725  ? 1389.85 1348.72 161.470  o  ?  ?  ?  ?
    5   0 -15  53.888  52.914  ? 2903.90 2799.84 139.021  o  ?  ?  ?  ?
    5   0 -13  56.595  47.631  ? 3202.97 2268.68 164.590  o  ?  ?  ?  ?
    5   0 -11  19.258  21.331  ? 370.876 455.008  31.589  o  ?  ?  ?  ?
    5   0  -9 167.742 172.732  ? 28137.5 29836.4 1174.60  o  ?  ?  ?  ?
    5   0  -7  11.269   9.463  ? 126.992  89.551  13.888  o  ?  ?  ?  ?
    5   0  -5 196.780 198.651  ? 38722.6 39462.1 1009.19  o  ?  ?  ?  ?
    5   0  -3  15.565   8.434  ? 242.259  71.138 1574.43  <  ?  ?  ?  ?
    5   0  -1 122.993 129.047  ? 15127.3 16653.1 1072.25  o  ?  ?  ?  ?
    5   0   1 124.082 120.388  ? 15396.4 14493.4 467.705  o  ?  ?  ?  ?
    5   0   3 105.229 102.987  ? 11073.0 10606.3 411.378  o  ?  ?  ?  ?
    5   0   5 141.537 148.276  ? 20032.7 21985.7 722.554  o  ?  ?  ?  ?
    5   0   7  16.865  25.644  ? 284.443 657.626 497.223  <  ?  ?  ?  ?
    5   0   9 103.577 109.160  ? 10728.2 11915.8 473.004  o  ?  ?  ?  ?
    5   0  11  54.762  51.891  ? 2998.89 2692.71 172.521  o  ?  ?  ?  ?
    5   0  13  85.573  80.760  ? 7322.69 6522.24 423.862  o  ?  ?  ?  ?
    5   0  15  45.325  44.137  ? 2054.35 1948.11 276.123  o  ?  ?  ?  ?
    5   0  17  45.613  48.309  ? 2080.58 2333.73 324.795  o  ?  ?  ?  ?
    5   0  19  34.258  36.602  ? 1173.63 1339.68 254.241  o  ?  ?  ?  ?
    5   0  21   6.546   9.767  ?  42.853  95.398 141.917  <  ?  ?  ?  ?
    5   1 -22    .128   1.275  ?    .016   1.625 111.701  <  ?  ?  ?  ?
    5   1 -21  35.110  33.448  ? 1232.71 1118.75 143.376  o  ?  ?  ?  ?
    5   1 -20   4.134   5.091  ?  17.093  25.923  58.316  <  ?  ?  ?  ?
    5   1 -19  18.961  19.940  ? 359.521 397.602  64.048  o  ?  ?  ?  ?
    5   1 -18   6.195   2.067  ?  38.375   4.272  42.730  <  ?  ?  ?  ?
    5   1 -17  51.263  49.409  ? 2627.95 2441.24 163.026  o  ?  ?  ?  ?
    5   1 -16  11.895   7.767  ? 141.499  60.319  25.711  o  ?  ?  ?  ?
    5   1 -15  65.559  65.373  ? 4297.94 4273.58 158.380  o  ?  ?  ?  ?
    5   1 -14  29.262  27.225  ? 856.284 741.202  23.293  o  ?  ?  ?  ?
    5   1 -13  48.046  49.451  ? 2308.40 2445.43  63.074  o  ?  ?  ?  ?
    5   1 -12  11.765  11.955  ? 138.409 142.921  10.484  o  ?  ?  ?  ?
    5   1 -11 107.564 107.015  ? 11570.0 11452.3 370.328  o  ?  ?  ?  ?
    5   1 -10  23.318  24.533  ? 543.723 601.851  14.347  o  ?  ?  ?  ?
    5   1  -9  15.616  13.084  ? 243.866 171.182   8.961  o  ?  ?  ?  ?
    5   1  -8  13.631  17.193  ? 185.797 295.591   7.897  o  ?  ?  ?  ?
    5   1  -7 178.669 178.957  ? 31922.6 32025.7 813.952  o  ?  ?  ?  ?
    5   1  -6   4.695  10.238  ?  22.045 104.826   3.822  o  ?  ?  ?  ?
    5   1  -5  23.931  28.600  ? 572.713 817.977   8.961  o  ?  ?  ?  ?
    5   1  -4    .118   5.266  ?    .014  27.730   2.721  <  ?  ?  ?  ?
    5   1  -3 138.064 140.105  ? 19061.6 19629.4 248.430  o  ?  ?  ?  ?
    5   1  -2  29.120  27.291  ? 847.956 744.772   7.558  o  ?  ?  ?  ?
    5   1  -1 118.368 121.511  ? 14011.0 14765.0 256.193  o  ?  ?  ?  ?
    5   1   0   8.080   9.000  ?  65.288  81.002   3.139  o  ?  ?  ?  ?
    5   1   1 112.625 116.137  ? 12684.5 13487.7 224.025  o  ?  ?  ?  ?
    5   1   2  22.386  20.040  ? 501.121 401.616   8.244  o  ?  ?  ?  ?
    5   1   3 160.090 160.370  ? 25628.8 25718.6 499.951  o  ?  ?  ?  ?
    5   1   4   6.843  11.450  ?  46.821 131.091   6.584  o  ?  ?  ?  ?
    5   1   5  46.334  47.428  ? 2146.80 2249.43  37.322  o  ?  ?  ?  ?
    5   1   6  13.366  21.245  ? 178.656 451.357   8.961  o  ?  ?  ?  ?
    5   1   7 147.289 146.979  ? 21694.1 21602.9 827.956  o  ?  ?  ?  ?
    5   1   8   6.002   1.196  ?  36.023   1.431   9.331  o  ?  ?  ?  ?
    5   1   9  19.043  17.506  ? 362.642 306.443  16.754  o  ?  ?  ?  ?
    5   1  10  10.308  12.613  ? 106.250 159.078  12.992  o  ?  ?  ?  ?
    5   1  11  95.350  96.544  ? 9091.59 9320.65 288.440  o  ?  ?  ?  ?
    5   1  12  24.191  16.541  ? 585.196 273.589  30.906  o  ?  ?  ?  ?
    5   1  13  46.073  45.124  ? 2122.70 2036.21 115.609  o  ?  ?  ?  ?
    5   1  14   4.804   8.491  ?  23.077  72.096  30.906  <  ?  ?  ?  ?
    5   1  15  59.659  59.679  ? 3559.25 3561.55 207.869  o  ?  ?  ?  ?
    5   1  16  10.961  13.930  ? 120.145 194.057  41.148  o  ?  ?  ?  ?
    5   1  17  37.908  39.345  ? 1437.02 1548.04 127.735  o  ?  ?  ?  ?
    5   1  18   -.083   1.564  ?    .007   2.447  54.643  <  ?  ?  ?  ?
    5   1  19  21.458  21.929  ? 460.429 480.883  91.995  o  ?  ?  ?  ?
    5   1  20    .259   7.007  ?    .067  49.102  74.200  <  ?  ?  ?  ?
    5   1  21  28.348  30.632  ? 803.593 938.314 119.583  o  ?  ?  ?  ?
    5   2 -22   6.691   8.721  ?  44.772  76.059  50.221  <  ?  ?  ?  ?
    5   2 -21  11.895   9.854  ? 141.493  97.109  46.817  o  ?  ?  ?  ?
    5   2 -20   6.889   6.182  ?  47.453  38.217  32.280  <  ?  ?  ?  ?
    5   2 -19  40.424  40.006  ? 1634.08 1600.46  89.666  o  ?  ?  ?  ?
    5   2 -18  12.827  17.030  ? 164.529 290.016  30.906  o  ?  ?  ?  ?
    5   2 -17  41.227  40.936  ? 1699.64 1675.73 123.625  o  ?  ?  ?  ?
    5   2 -16   4.092   2.734  ?  16.747   7.475  17.769  <  ?  ?  ?  ?
    5   2 -15  54.065  53.131  ? 2923.00 2822.89 149.288  o  ?  ?  ?  ?
    5   2 -14   5.678   6.329  ?  32.235  40.060  10.883  o  ?  ?  ?  ?
    5   2 -13  71.441  72.379  ? 5103.78 5238.68 101.609  o  ?  ?  ?  ?
    5   2 -12  31.627  30.766  ? 1000.29 946.564  18.288  o  ?  ?  ?  ?
    5   2 -11  33.033  32.494  ? 1091.16 1055.86  20.994  o  ?  ?  ?  ?
    5   2 -10  39.031  39.849  ? 1523.41 1587.94  28.902  o  ?  ?  ?  ?
    5   2  -9 133.976 129.470  ? 17949.7 16762.5 475.665  o  ?  ?  ?  ?
    5   2  -8  64.997  67.829  ? 4224.62 4600.77  80.649  o  ?  ?  ?  ?
    5   2  -7  17.519  18.146  ? 306.928 329.269  10.092  o  ?  ?  ?  ?
    5   2  -6  50.372  48.541  ? 2537.36 2356.22  40.367  o  ?  ?  ?  ?
    5   2  -5 145.278 144.169  ? 21105.8 20784.6 561.861  o  ?  ?  ?  ?
    5   2  -4  68.900  72.231  ? 4747.16 5217.26  48.504  o  ?  ?  ?  ?
    5   2  -3 101.956 101.969  ? 10395.1 10397.8 367.980  o  ?  ?  ?  ?
    5   2  -2  12.639  15.067  ? 159.742 227.003   3.587  o  ?  ?  ?  ?
    5   2  -1 125.191 129.186  ? 15672.9 16688.9 639.685  o  ?  ?  ?  ?
    5   2   0  35.585  39.788  ? 1266.29 1583.05  14.347  o  ?  ?  ?  ?
    5   2   1 138.022 138.192  ? 19050.0 19097.2 396.644  o  ?  ?  ?  ?
    5   2   2   8.030   7.400  ?  64.487  54.765   5.109  o  ?  ?  ?  ?
    5   2   3  83.185  87.295  ? 6919.79 7620.43 101.609  o  ?  ?  ?  ?
    5   2   4  79.627  78.035  ? 6340.46 6089.43 106.595  o  ?  ?  ?  ?
    5   2   5 182.300 177.591  ? 33233.4 31538.5 1141.34  o  ?  ?  ?  ?
    5   2   6  24.106  25.491  ? 581.123 649.802  14.347  o  ?  ?  ?  ?
    5   2   7  55.448  56.156  ? 3074.51 3153.46  59.252  o  ?  ?  ?  ?
    5   2   8  15.747  15.945  ? 247.973 254.229  13.888  o  ?  ?  ?  ?
    5   2   9 111.849 110.927  ? 12510.1 12304.7 329.214  o  ?  ?  ?  ?
    5   2  10  24.194  25.907  ? 585.342 671.157  20.994  o  ?  ?  ?  ?
    5   2  11  26.482  28.013  ? 701.312 784.741  30.231  o  ?  ?  ?  ?
    5   2  12  15.081  17.656  ? 227.430 311.731  29.563  o  ?  ?  ?  ?
    5   2  13  62.116  68.540  ? 3858.42 4697.78 195.720  o  ?  ?  ?  ?
    5   2  14  41.749  41.108  ? 1743.01 1689.84 104.087  o  ?  ?  ?  ?
    5   2  15  34.864  37.578  ? 1215.52 1412.08  83.975  o  ?  ?  ?  ?
    5   2  16   5.054   7.029  ?  25.546  49.413  38.072  <  ?  ?  ?  ?
    5   2  17  37.900  38.684  ? 1436.43 1496.47 109.133  o  ?  ?  ?  ?
    5   2  18  13.583  16.577  ? 184.494 274.781  61.148  o  ?  ?  ?  ?
    5   2  19  36.740  35.034  ? 1349.84 1227.39 155.319  o  ?  ?  ?  ?
    5   2  20    .203    .486  ?    .041    .236  69.031  <  ?  ?  ?  ?
    5   2  21    .448   9.474  ?    .200  89.753 104.087  <  ?  ?  ?  ?
    5   3 -22    .369   7.237  ?    .136  52.380 183.938  <  ?  ?  ?  ?
    5   3 -21  27.057  27.819  ? 732.074 773.918  88.513  o  ?  ?  ?  ?
    5   3 -20  16.061  17.677  ? 257.971 312.460  58.316  o  ?  ?  ?  ?
    5   3 -19  19.487  19.516  ? 379.735 380.874  77.391  o  ?  ?  ?  ?
    5   3 -18   9.843  10.875  ?  96.880 118.257  37.322  o  ?  ?  ?  ?
    5   3 -17  42.356  37.521  ? 1794.03 1407.82 143.376  o  ?  ?  ?  ?
    5   3 -16  32.068  33.823  ? 1028.36 1144.01  46.817  o  ?  ?  ?  ?
    5   3 -15  41.088  43.293  ? 1688.23 1874.32  91.995  o  ?  ?  ?  ?
    5   3 -14  10.388  11.548  ? 107.904 133.345  21.557  o  ?  ?  ?  ?
    5   3 -13  41.204  42.020  ? 1697.76 1765.72 107.861  o  ?  ?  ?  ?
    5   3 -12  41.152  45.328  ? 1693.48 2054.67  45.984  o  ?  ?  ?  ?
    5   3 -11  77.105  78.562  ? 5945.22 6171.91 130.511  o  ?  ?  ?  ?
    5   3 -10  27.409  29.869  ? 751.269 892.155  16.754  o  ?  ?  ?  ?
    5   3  -9  16.782  18.216  ? 281.650 331.828  12.126  o  ?  ?  ?  ?
    5   3  -8  65.159  64.277  ? 4245.67 4131.57  82.859  o  ?  ?  ?  ?
    5   3  -7 114.677 111.215  ? 13150.9 12368.8 475.665  o  ?  ?  ?  ?
    5   3  -6  51.209  51.690  ? 2622.35 2671.85  45.984  o  ?  ?  ?  ?
    5   3  -5  46.356  42.968  ? 2148.83 1846.21  27.603  o  ?  ?  ?  ?
    5   3  -4  32.315  34.418  ? 1044.23 1184.59  13.888  o  ?  ?  ?  ?
    5   3  -3 126.296 126.214  ? 15950.8 15929.9 408.904  o  ?  ?  ?  ?
    5   3  -2 110.799 110.180  ? 12276.5 12139.6 305.279  o  ?  ?  ?  ?
    5   3  -1  85.803  85.130  ? 7362.11 7247.20 177.369  o  ?  ?  ?  ?
    5   3   0  12.560  13.668  ? 157.741 186.827   5.972  o  ?  ?  ?  ?
    5   3   1 113.743 113.418  ? 12937.4 12863.6 120.923  o  ?  ?  ?  ?
    5   3   2  87.775  88.449  ? 7704.52 7823.17 118.251  o  ?  ?  ?  ?
    5   3   3 121.842 124.854  ? 14845.4 15588.5 481.010  o  ?  ?  ?  ?
    5   3   4  17.731  20.549  ? 314.406 422.272   8.244  o  ?  ?  ?  ?
    5   3   5  77.174  79.267  ? 5955.83 6283.22 169.326  o  ?  ?  ?  ?
    5   3   6  60.606  58.182  ? 3673.13 3385.17  79.556  o  ?  ?  ?  ?
    5   3   7 127.531 127.471  ? 16264.3 16248.8 615.201  o  ?  ?  ?  ?
    5   3   8  61.105  58.775  ? 3733.79 3454.50  96.742  o  ?  ?  ?  ?
    5   3   9  14.505  14.288  ? 210.402 204.145  13.888  o  ?  ?  ?  ?
    5   3  10  35.137  40.228  ? 1234.59 1618.33  41.935  o  ?  ?  ?  ?
    5   3  11  74.946  78.381  ? 5616.97 6143.59 256.193  o  ?  ?  ?  ?
    5   3  12  36.136  41.654  ? 1305.78 1735.02  45.984  o  ?  ?  ?  ?
    5   3  13  23.949  26.151  ? 573.567 683.887  42.730  o  ?  ?  ?  ?
    5   3  14  13.403  14.780  ? 179.636 218.453  32.978  o  ?  ?  ?  ?
    5   3  15  51.493  55.360  ? 2651.50 3064.68 278.157  o  ?  ?  ?  ?
    5   3  16  26.750  27.748  ? 715.572 769.946  66.019  o  ?  ?  ?  ?
    5   3  17  25.780  24.539  ? 664.611 602.175  65.030  o  ?  ?  ?  ?
    5   3  18   4.131   6.327  ?  17.067  40.026  45.160  <  ?  ?  ?  ?
    5   3  19  15.354  15.903  ? 235.754 252.897  59.252  o  ?  ?  ?  ?
    5   3  20  13.739  15.419  ? 188.750 237.740  81.750  o  ?  ?  ?  ?
    5   3  21  20.179  26.999  ? 407.195 728.934 630.447  o  ?  ?  ?  ?
    5   4 -21   3.205   6.789  ?  10.274  46.088  71.076  <  ?  ?  ?  ?
    5   4 -20   7.865  12.317  ?  61.864 151.702 109.133  <  ?  ?  ?  ?
    5   4 -19  23.054  25.514  ? 531.494 650.964 153.800  o  ?  ?  ?  ?
    5   4 -18  36.251  35.249  ? 1314.14 1242.52 252.297  o  ?  ?  ?  ?
    5   4 -17  24.437  25.552  ? 597.145 652.883  72.110  o  ?  ?  ?  ?
    5   4 -16   4.586   7.338  ?  21.033  53.839  35.116  <  ?  ?  ?  ?
    5   4 -15  36.440  38.913  ? 1327.91 1514.24 105.338  o  ?  ?  ?  ?
    5   4 -14  48.690  52.718  ? 2370.75 2779.17 150.785  o  ?  ?  ?  ?
    5   4 -13  54.107  55.940  ? 2927.62 3129.29 170.920  o  ?  ?  ?  ?
    5   4 -12   7.485   7.138  ?  56.029  50.956  24.487  <  ?  ?  ?  ?
    5   4 -11  20.279  20.634  ? 411.253 425.762  30.906  o  ?  ?  ?  ?
    5   4 -10  55.113  60.484  ? 3037.40 3658.28  97.948  o  ?  ?  ?  ?
    5   4  -9  78.169  78.614  ? 6110.44 6180.09 179.000  o  ?  ?  ?  ?
    5   4  -8  32.919  36.600  ? 1083.66 1339.58  34.396  o  ?  ?  ?  ?
    5   4  -7    .151   2.229  ?    .023   4.971   7.558  <  ?  ?  ?  ?
    5   4  -6  50.135  50.887  ? 2513.55 2589.46  66.019  o  ?  ?  ?  ?
    5   4  -5  88.055  89.144  ? 7753.63 7946.68 146.317  o  ?  ?  ?  ?
    5   4  -4  87.614  84.408  ? 7676.18 7124.66 174.130  o  ?  ?  ?  ?
    5   4  -3  65.117  69.071  ? 4240.19 4770.75 119.583  o  ?  ?  ?  ?
    5   4  -2   -.874   3.967  ?    .765  15.735   8.961  <  ?  ?  ?  ?
    5   4  -1 106.932 109.148  ? 11434.4 11913.3 303.148  o  ?  ?  ?  ?
    5   4   0 123.506 116.045  ? 15253.6 13466.5 413.860  o  ?  ?  ?  ?
    5   4   1  81.450  85.088  ? 6634.05 7240.03 248.430  o  ?  ?  ?  ?
    5   4   2  18.875  21.128  ? 356.284 446.405   6.274  o  ?  ?  ?  ?
    5   4   3  51.671  54.255  ? 2669.87 2943.55  30.906  o  ?  ?  ?  ?
    5   4   4 107.238 107.871  ? 11499.9 11636.0 225.858  o  ?  ?  ?  ?
    5   4   5 103.602 107.332  ? 10733.5 11520.2 294.698  o  ?  ?  ?  ?
    5   4   6  54.979  57.730  ? 3022.65 3332.74  46.817  o  ?  ?  ?  ?
    5   4   7  15.914  13.736  ? 253.240 188.684  12.555  o  ?  ?  ?  ?
    5   4   8  61.205  61.547  ? 3746.05 3788.06 104.087  o  ?  ?  ?  ?
    5   4   9  83.795  85.121  ? 7021.61 7245.51 237.010  o  ?  ?  ?  ?
    5   4  10  33.973  35.801  ? 1154.17 1281.68  41.148  o  ?  ?  ?  ?
    5   4  11   7.005  11.026  ?  49.065 121.577  16.257  <  ?  ?  ?  ?
    5   4  12  26.079  27.124  ? 680.129 735.736  32.978  o  ?  ?  ?  ?
    5   4  13  52.030  50.972  ? 2707.13 2598.18 105.338  o  ?  ?  ?  ?
    5   4  14  34.539  36.470  ? 1192.94 1330.09  83.975  o  ?  ?  ?  ?
    5   4  15  20.830  20.294  ? 433.875 411.831  45.984  o  ?  ?  ?  ?
    5   4  16   9.832  10.832  ?  96.658 117.336  38.830  o  ?  ?  ?  ?
    5   4  17  13.420  16.527  ? 180.095 273.155  46.817  o  ?  ?  ?  ?
    5   4  18  30.847  29.945  ? 951.529 896.707  83.975  o  ?  ?  ?  ?
    5   4  19  23.773  24.456  ? 565.138 598.096  74.200  o  ?  ?  ?  ?
    5   4  20    .268   6.867  ?    .072  47.151  58.316  <  ?  ?  ?  ?
    5   4  21    .308   7.226  ?    .095  52.220 606.143  <  ?  ?  ?  ?
    5   5 -20  21.285  23.851  ? 453.035 568.860 172.521  o  ?  ?  ?  ?
    5   5 -19  11.293  10.624  ? 127.526 112.878  95.544  o  ?  ?  ?  ?
    5   5 -18   5.368   7.769  ?  28.816  60.356  42.730  <  ?  ?  ?  ?
    5   5 -17  17.529  20.200  ? 307.279 408.056  58.316  o  ?  ?  ?  ?
    5   5 -16  41.255  42.796  ? 1701.99 1831.51 133.318  o  ?  ?  ?  ?
    5   5 -15  24.647  26.971  ? 607.499 727.411  67.015  o  ?  ?  ?  ?
    5   5 -14   6.806   7.365  ?  46.318  54.242  31.589  <  ?  ?  ?  ?
    5   5 -13  27.671  30.758  ? 765.687 946.041  67.015  o  ?  ?  ?  ?
    5   5 -12  57.166  61.290  ? 3267.96 3756.51 199.154  o  ?  ?  ?  ?
    5   5 -11  52.868  51.183  ? 2794.99 2619.72 172.521  o  ?  ?  ?  ?
    5   5 -10  21.682  24.022  ? 470.092 577.070  35.844  o  ?  ?  ?  ?
    5   5  -9    .994    .594  ?    .989    .352  20.994  <  ?  ?  ?  ?
    5   5  -8  60.405  60.911  ? 3648.81 3710.19 150.785  o  ?  ?  ?  ?
    5   5  -7  78.714  81.070  ? 6195.86 6572.28 190.626  o  ?  ?  ?  ?
    5   5  -6  61.984  61.518  ? 3841.96 3784.44 118.251  o  ?  ?  ?  ?
    5   5  -5  24.818  27.625  ? 615.914 763.138  17.769  o  ?  ?  ?  ?
    5   5  -4  28.260  30.395  ? 798.654 923.865  20.994  o  ?  ?  ?  ?
    5   5  -3  76.948  79.033  ? 5920.97 6246.28 109.133  o  ?  ?  ?  ?
    5   5  -2  94.799  97.084  ? 8986.85 9425.23 190.626  o  ?  ?  ?  ?
    5   5  -1  48.018  51.354  ? 2305.72 2637.28  46.817  o  ?  ?  ?  ?
    5   5   0    .238   2.956  ?    .056   8.738   8.244  <  ?  ?  ?  ?
    5   5   1  58.209  64.568  ? 3388.23 4169.00  65.030  o  ?  ?  ?  ?
    5   5   2 115.187 114.125  ? 13268.0 13024.6 274.097  o  ?  ?  ?  ?
    5   5   3  52.670  55.276  ? 2774.14 3055.49  38.830  o  ?  ?  ?  ?
    5   5   4  26.097  30.200  ? 681.072 912.044  11.704  o  ?  ?  ?  ?
    5   5   5   4.614   4.461  ?  21.290  19.901   7.558  <  ?  ?  ?  ?
    5   5   6  78.031  78.921  ? 6088.83 6228.60 213.187  o  ?  ?  ?  ?
    5   5   7  68.640  65.775  ? 4711.49 4326.31 143.376  o  ?  ?  ?  ?
    5   5   8  47.620  52.670  ? 2267.62 2774.09  68.019  o  ?  ?  ?  ?
    5   5   9  13.896  12.978  ? 193.112 168.440  22.128  o  ?  ?  ?  ?
    5   5  10  47.859  46.541  ? 2290.47 2166.02  85.098  o  ?  ?  ?  ?
    5   5  11  45.100  44.753  ? 2034.03 2002.86  81.750  o  ?  ?  ?  ?
    5   5  12  50.377  49.584  ? 2537.80 2458.59 124.988  o  ?  ?  ?  ?
    5   5  13  22.156  21.940  ? 490.901 481.377  40.367  o  ?  ?  ?  ?
    5   5  14   9.808  10.070  ?  96.190 101.406  29.563  o  ?  ?  ?  ?
    5   5  15  19.852  19.661  ? 394.110 386.546  55.550  o  ?  ?  ?  ?
    5   5  16  42.075  41.369  ? 1770.33 1711.41 155.319  o  ?  ?  ?  ?
    5   5  17  19.570  22.751  ? 382.968 517.609  64.048  o  ?  ?  ?  ?
    5   5  18   4.476   5.477  ?  20.035  29.996  48.504  <  ?  ?  ?  ?
    5   5  19   6.842  10.858  ?  46.816 117.906  63.074  <  ?  ?  ?  ?
    5   5  20  12.500  20.751  ? 156.239 430.620 303.148  <  ?  ?  ?  ?
    5   6 -19  10.219   9.896  ? 104.420  97.930 102.845  <  ?  ?  ?  ?
    5   6 -18  25.975  30.542  ? 674.675 932.838  91.995  o  ?  ?  ?  ?
    5   6 -17   3.259   9.614  ?  10.622  92.429  42.730  <  ?  ?  ?  ?
    5   6 -16   2.629    .103  ?   6.914    .011  41.148  <  ?  ?  ?  ?
    5   6 -15  14.375  16.546  ? 206.634 273.768  44.342  o  ?  ?  ?  ?
    5   6 -14  41.991  47.319  ? 1763.21 2239.08 139.021  o  ?  ?  ?  ?
    5   6 -13  25.414  27.686  ? 645.855 766.496  73.151  o  ?  ?  ?  ?
    5   6 -12  30.427  33.402  ? 925.810 1115.69  81.750  o  ?  ?  ?  ?
    5   6 -11   7.026   9.587  ?  49.359  91.920  33.683  <  ?  ?  ?  ?
    5   6 -10  58.047  60.452  ? 3369.44 3654.42 214.975  o  ?  ?  ?  ?
    5   6  -9  42.566  44.457  ? 1811.87 1976.38  94.354  o  ?  ?  ?  ?
    5   6  -8  48.674  47.273  ? 2369.18 2234.72 112.996  o  ?  ?  ?  ?
    5   6  -7   9.050  10.085  ?  81.910 101.708  16.754  o  ?  ?  ?  ?
    5   6  -6  45.158  46.484  ? 2039.23 2160.72  73.151  o  ?  ?  ?  ?
    5   6  -5  56.686  57.481  ? 3213.32 3304.06  86.229  o  ?  ?  ?  ?
    5   6  -4  85.043  85.397  ? 7232.36 7292.62 177.369  o  ?  ?  ?  ?
    5   6  -3   9.603   9.282  ?  92.215  86.159  14.813  o  ?  ?  ?  ?
    5   6  -2  17.981  17.718  ? 323.330 313.915  20.994  o  ?  ?  ?  ?
    5   6  -1  53.106  51.606  ? 2820.23 2663.13  80.649  o  ?  ?  ?  ?
    5   6   0 108.440 109.230  ? 11759.3 11931.1 318.223  o  ?  ?  ?  ?
    5   6   1  15.361  14.444  ? 235.969 208.640  23.293  o  ?  ?  ?  ?
    5   6   2  16.474  16.391  ? 271.390 268.674  18.814  o  ?  ?  ?  ?
    5   6   3  17.190  18.975  ? 295.501 360.036  13.436  o  ?  ?  ?  ?
    5   6   4  73.131  72.865  ? 5348.11 5309.25 144.843  o  ?  ?  ?  ?
    5   6   5  28.302  26.738  ? 800.991 714.925  35.116  o  ?  ?  ?  ?
    5   6   6  38.906  39.682  ? 1513.64 1574.65  72.110  o  ?  ?  ?  ?
    5   6   7   9.614  12.149  ?  92.437 147.598 324.795  <  ?  ?  ?  ?
    5   6   8  54.757  54.266  ? 2998.28 2944.78 104.087  o  ?  ?  ?  ?
    5   6   9  38.333  39.177  ? 1469.38 1534.85  67.015  o  ?  ?  ?  ?
    5   6  10  54.001  55.253  ? 2916.11 3052.93 114.299  o  ?  ?  ?  ?
    5   6  11  15.100  10.996  ? 228.020 120.921  28.902  o  ?  ?  ?  ?
    5   6  12  25.972  28.261  ? 674.562 798.660  41.935  o  ?  ?  ?  ?
    5   6  13  27.667  29.866  ? 765.453 891.968  51.090  o  ?  ?  ?  ?
    5   6  14  44.542  45.498  ? 1983.97 2070.04 123.625  o  ?  ?  ?  ?
    5   6  15  15.225  17.448  ? 231.792 304.418  51.967  o  ?  ?  ?  ?
    5   6  16    .097   1.203  ?    .009   1.447  46.817  <  ?  ?  ?  ?
    5   6  17  12.410  13.150  ? 154.014 172.921  58.316  o  ?  ?  ?  ?
    5   6  18  26.685  28.740  ? 712.077 825.962  88.513  o  ?  ?  ?  ?
    5   6  19   8.840  10.857  ?  78.144 117.876 127.735  <  ?  ?  ?  ?
    5   7 -19    .145    .163  ?    .021    .027 144.843  <  ?  ?  ?  ?
    5   7 -18    .291   4.331  ?    .085  18.760 114.299  <  ?  ?  ?  ?
    5   7 -17   7.600   9.058  ?  57.765  82.038  50.221  <  ?  ?  ?  ?
    5   7 -16  31.594  34.566  ? 998.195 1194.80 109.133  o  ?  ?  ?  ?
    5   7 -15   9.761   9.544  ?  95.283  91.090  48.504  o  ?  ?  ?  ?
    5   7 -14  11.996  12.178  ? 143.914 148.300  45.984  o  ?  ?  ?  ?
    5   7 -13   8.647   7.860  ?  74.772  61.777  41.148  <  ?  ?  ?  ?
    5   7 -12  47.487  53.164  ? 2255.05 2826.43 175.746  o  ?  ?  ?  ?
    5   7 -11  21.783  24.401  ? 474.500 595.420  63.074  o  ?  ?  ?  ?
    5   7 -10  37.644  41.177  ? 1417.07 1695.54 112.996  o  ?  ?  ?  ?
    5   7  -9   5.222   6.262  ?  27.270  39.211  31.589  <  ?  ?  ?  ?
    5   7  -8  48.538  51.774  ? 2355.96 2680.54 127.735  o  ?  ?  ?  ?
    5   7  -7  14.710  15.566  ? 216.374 242.296  25.095  o  ?  ?  ?  ?
    5   7  -6  71.843  72.595  ? 5161.42 5270.04 187.267  o  ?  ?  ?  ?
    5   7  -5   3.892   5.836  ?  15.150  34.062  19.889  <  ?  ?  ?  ?
    5   7  -4  31.803  31.944  ? 1011.42 1020.40  41.148  o  ?  ?  ?  ?
    5   7  -3  26.051  27.963  ? 678.656 781.939  38.830  o  ?  ?  ?  ?
    5   7  -2 108.299 102.085  ? 11728.6 10421.3 416.350  o  ?  ?  ?  ?
    5   7  -1  15.152  16.734  ? 229.580 280.027  28.249  o  ?  ?  ?  ?
    5   7   0  18.048  18.706  ? 325.724 349.912  25.095  o  ?  ?  ?  ?
    5   7   1  26.898  28.449  ? 723.489 809.355  36.579  o  ?  ?  ?  ?
    5   7   2  82.958  81.610  ? 6882.04 6660.12 200.882  o  ?  ?  ?  ?
    5   7   3   7.292  10.115  ?  53.173 102.314  20.438  <  ?  ?  ?  ?
    5   7   4  25.657  25.882  ? 658.261 669.890  33.683  o  ?  ?  ?  ?
    5   7   5    .341   5.143  ?    .116  26.447  20.994  <  ?  ?  ?  ?
    5   7   6  53.772  54.578  ? 2891.41 2978.76 158.380  o  ?  ?  ?  ?
    5   7   7  21.353  22.977  ? 455.948 527.965  45.160  o  ?  ?  ?  ?
    5   7   8  48.549  45.165  ? 2357.04 2039.88 166.161  o  ?  ?  ?  ?
    5   7   9   4.997    .754  ?  24.973    .568  30.906  <  ?  ?  ?  ?
    5   7  10  37.091  36.681  ? 1375.76 1345.46  99.161  o  ?  ?  ?  ?
    5   7  11  21.316  20.999  ? 454.367 440.942  56.464  o  ?  ?  ?  ?
    5   7  12  50.259  50.619  ? 2525.94 2562.30 133.318  o  ?  ?  ?  ?
    5   7  13   8.296   8.783  ?  68.832  77.139  32.978  <  ?  ?  ?  ?
    5   7  14  12.481  13.612  ? 155.768 185.276  35.844  o  ?  ?  ?  ?
    5   7  15   7.301  10.134  ?  53.299 102.689  38.072  <  ?  ?  ?  ?
    5   7  16  31.039  32.226  ? 963.426 1038.52  97.948  o  ?  ?  ?  ?
    5   7  17  12.157  10.526  ? 147.784 110.787  73.151  o  ?  ?  ?  ?
    5   7  18   3.442   4.770  ?  11.845  22.750 231.400  <  ?  ?  ?  ?
    5   8 -17    .060   2.826  ?    .004   7.984 130.511  <  ?  ?  ?  ?
    5   8 -16    .059    .668  ?    .003    .446  46.817  <  ?  ?  ?  ?
    5   8 -15   9.935   5.709  ?  98.704  32.592  55.550  o  ?  ?  ?  ?
    5   8 -14  37.611  41.142  ? 1414.57 1692.68 146.317  o  ?  ?  ?  ?
    5   8 -13   6.994   6.327  ?  48.920  40.034  43.532  <  ?  ?  ?  ?
    5   8 -12  20.161  21.077  ? 406.478 444.260  71.076  o  ?  ?  ?  ?
    5   8 -11   6.329   5.426  ?  40.051  29.443  44.342  <  ?  ?  ?  ?
    5   8 -10  47.725  48.419  ? 2277.67 2344.41 194.015  o  ?  ?  ?  ?
    5   8  -9   9.497   8.923  ?  90.190  79.625  45.984  o  ?  ?  ?  ?
    5   8  -8  46.000  47.177  ? 2116.02 2225.66 175.746  o  ?  ?  ?  ?
    5   8  -7    .015   1.615  ?    .000   2.607  19.348  <  ?  ?  ?  ?
    5   8  -6  47.827  49.670  ? 2287.42 2467.11 105.338  o  ?  ?  ?  ?
    5   8  -5    .409   3.734  ?    .168  13.940  24.487  <  ?  ?  ?  ?
    5   8  -4  77.486  75.627  ? 6004.04 5719.45 276.123  o  ?  ?  ?  ?
    5   8  -3  12.910  16.323  ? 166.666 266.446  34.396  o  ?  ?  ?  ?
    5   8  -2  37.071  38.879  ? 1374.28 1511.56  58.316  o  ?  ?  ?  ?
    5   8  -1  13.635  15.079  ? 185.913 227.387  25.711  o  ?  ?  ?  ?
    5   8   0  87.428  83.432  ? 7643.58 6960.93 307.418  o  ?  ?  ?  ?
    5   8   1   7.734  10.027  ?  59.814 100.535  26.334  <  ?  ?  ?  ?
    5   8   2   7.765  12.809  ?  60.294 164.071  22.128  <  ?  ?  ?  ?
    5   8   3   2.918    .998  ?   8.512    .996  19.889  <  ?  ?  ?  ?
    5   8   4  62.335  62.410  ? 3885.65 3895.01 179.000  o  ?  ?  ?  ?
    5   8   5  17.779  17.403  ? 316.104 302.857  39.595  o  ?  ?  ?  ?
    5   8   6  35.299  35.327  ? 1246.02 1248.00  79.556  o  ?  ?  ?  ?
    5   8   7   4.445   3.394  ?  19.761  11.517  28.902  <  ?  ?  ?  ?
    5   8   8  55.023  53.844  ? 3027.51 2899.16 192.317  o  ?  ?  ?  ?
    5   8   9   8.325   7.778  ?  69.309  60.498  38.830  <  ?  ?  ?  ?
    5   8  10  51.543  49.517  ? 2656.64 2451.96 246.508  o  ?  ?  ?  ?
    5   8  11   5.432   1.284  ?  29.508   1.650  44.342  <  ?  ?  ?  ?
    5   8  12  24.908  23.079  ? 620.407 532.640  77.391  o  ?  ?  ?  ?
    5   8  13   8.424   6.928  ?  70.965  47.998  51.967  <  ?  ?  ?  ?
    5   8  14  38.340  36.995  ? 1469.98 1368.66 147.799  o  ?  ?  ?  ?
    5   8  15   7.137   2.897  ?  50.940   8.393  56.464  <  ?  ?  ?  ?
    5   8  16   6.032   4.051  ?  36.386  16.414 126.357  <  ?  ?  ?  ?
    5   9 -14   7.789   4.959  ?  60.672  24.594  63.074  <  ?  ?  ?  ?
    5   9 -13   4.588   1.598  ?  21.046   2.555  55.550  <  ?  ?  ?  ?
    5   9 -12  41.499  41.160  ? 1722.18 1694.18 179.000  o  ?  ?  ?  ?
    5   9 -11   1.199   3.162  ?   1.439   9.996  50.221  <  ?  ?  ?  ?
    5   9 -10  24.459  25.851  ? 598.219 668.278  95.544  o  ?  ?  ?  ?
    5   9  -9   5.905   1.305  ?  34.866   1.703  51.967  <  ?  ?  ?  ?
    5   9  -8  39.513  37.671  ? 1561.24 1419.10 158.380  o  ?  ?  ?  ?
    5   9  -7    .036   4.945  ?    .001  24.449  32.280  <  ?  ?  ?  ?
    5   9  -6  46.494  46.364  ? 2161.73 2149.64 111.701  o  ?  ?  ?  ?
    5   9  -5   3.766    .003  ?  14.181    .000  27.603  <  ?  ?  ?  ?
    5   9  -4  29.252  29.781  ? 855.672 886.937  62.108  o  ?  ?  ?  ?
    5   9  -3    .038    .545  ?    .001    .297  28.902  <  ?  ?  ?  ?
    5   9  -2  73.097  73.566  ? 5343.13 5411.90 351.756  o  ?  ?  ?  ?
    5   9  -1   -.161   3.675  ?    .026  13.504  28.902  <  ?  ?  ?  ?
    5   9   0    .116   2.100  ?    .013   4.410  22.707  <  ?  ?  ?  ?
    5   9   1   6.248   4.762  ?  39.034  22.680  26.965  <  ?  ?  ?  ?
    5   9   2  70.013  67.752  ? 4901.86 4590.39 233.263  o  ?  ?  ?  ?
    5   9   3   -.164   2.992  ?    .027   8.953  29.563  <  ?  ?  ?  ?
    5   9   4  21.679  22.351  ? 469.989 499.546  45.160  o  ?  ?  ?  ?
    5   9   5   8.338   3.696  ?  69.515  13.660  33.683  <  ?  ?  ?  ?
    5   9   6  48.953  46.657  ? 2396.44 2176.84 192.317  o  ?  ?  ?  ?
    5   9   7   -.119   2.170  ?    .014   4.708  36.579  <  ?  ?  ?  ?
    5   9   8  36.875  36.077  ? 1359.79 1301.53 104.087  o  ?  ?  ?  ?
    5   9   9   9.547   7.832  ?  91.154  61.344  49.358  o  ?  ?  ?  ?
    5   9  10  31.350  30.907  ? 982.846 955.240 101.609  o  ?  ?  ?  ?
    5   9  11   7.209   1.961  ?  51.965   3.845  54.643  <  ?  ?  ?  ?
    5   9  12  35.008  34.839  ? 1225.55 1213.77 119.583  o  ?  ?  ?  ?
    5   9  13   -.019   2.579  ?    .000   6.652  52.852  <  ?  ?  ?  ?
    5   9  14    .332   5.154  ?    .110  26.560 123.625  <  ?  ?  ?  ?
    5   9  15   3.537   3.006  ?  12.511   9.038 136.154  <  ?  ?  ?  ?
    5  10 -12   8.041   8.836  ?  64.657  78.069  67.015  <  ?  ?  ?  ?
    5  10 -11   8.462   2.991  ?  71.599   8.946  61.148  <  ?  ?  ?  ?
    5  10 -10  30.175  31.318  ? 910.540 980.795 134.733  o  ?  ?  ?  ?
    5  10  -9  10.752   9.301  ? 115.598  86.511  71.076  o  ?  ?  ?  ?
    5  10  -8  25.881  27.396  ? 669.814 750.544 118.251  o  ?  ?  ?  ?
    5  10  -7    .068   2.203  ?    .005   4.855  56.464  <  ?  ?  ?  ?
    5  10  -6  26.380  25.965  ? 695.930 674.205  74.200  o  ?  ?  ?  ?
    5  10  -5  14.587  14.865  ? 212.785 220.959  43.532  o  ?  ?  ?  ?
    5  10  -4  37.650  38.441  ? 1417.55 1477.74  99.161  o  ?  ?  ?  ?
    5  10  -3   -.238    .001  ?    .056    .000  33.683  <  ?  ?  ?  ?
    5  10  -2    .520   6.428  ?    .270  41.320  29.563  <  ?  ?  ?  ?
    5  10  -1    .356   4.063  ?    .127  16.504  34.396  <  ?  ?  ?  ?
    5  10   0  53.910  53.601  ? 2906.27 2873.11 207.869  o  ?  ?  ?  ?
    5  10   1   7.375   8.411  ?  54.383  70.740  37.322  <  ?  ?  ?  ?
    5  10   2  11.287  13.077  ? 127.390 171.000  39.595  o  ?  ?  ?  ?
    5  10   3   4.172   3.133  ?  17.410   9.818  36.579  <  ?  ?  ?  ?
    5  10   4  46.350  44.605  ? 2148.30 1989.62 169.326  o  ?  ?  ?  ?
    5  10   5  12.141  12.098  ? 147.411 146.364  39.595  o  ?  ?  ?  ?
    5  10   6  18.455  19.323  ? 340.573 373.386  50.221  o  ?  ?  ?  ?
    5  10   7    .093    .185  ?    .009    .034  44.342  <  ?  ?  ?  ?
    5  10   8  29.255  29.703  ? 855.828 882.287  93.171  o  ?  ?  ?  ?
    5  10   9   9.080   9.046  ?  82.440  81.833  56.464  <  ?  ?  ?  ?
    5  10  10  27.560  27.394  ? 759.575 750.457  99.161  o  ?  ?  ?  ?
    5  10  11   5.569   3.701  ?  31.010  13.696  53.744  <  ?  ?  ?  ?
    5  10  12  12.146  10.794  ? 147.527 116.505 288.440  <  ?  ?  ?  ?
    5  10  13   9.481   6.780  ?  89.892  45.968 311.717  <  ?  ?  ?  ?
    5  11  -9   8.223    .147  ?  67.620    .022 188.943  <  ?  ?  ?  ?
    5  11  -8  21.523  20.912  ? 463.225 437.327 120.923  o  ?  ?  ?  ?
    5  11  -7   7.572   9.162  ?  57.339  83.945  81.750  <  ?  ?  ?  ?
    5  11  -6  24.816  23.736  ? 615.857 563.399  88.513  o  ?  ?  ?  ?
    5  11  -5   5.433   8.572  ?  29.523  73.478  49.358  <  ?  ?  ?  ?
    5  11  -4  17.837  17.696  ? 318.163 313.142  59.252  o  ?  ?  ?  ?
    5  11  -3  15.789  18.363  ? 249.281 337.202  57.386  o  ?  ?  ?  ?
    5  11  -2  32.394  31.965  ? 1049.36 1021.75  93.171  o  ?  ?  ?  ?
    5  11  -1   7.190   7.538  ?  51.690  56.817  45.984  <  ?  ?  ?  ?
    5  11   0   3.181   1.608  ?  10.119   2.585  46.817  <  ?  ?  ?  ?
    5  11   1   9.290   9.829  ?  86.307  96.601  63.074  <  ?  ?  ?  ?
    5  11   2  37.052  36.289  ? 1372.82 1316.88 161.470  o  ?  ?  ?  ?
    5  11   3  11.328  12.290  ? 128.327 151.047  70.050  o  ?  ?  ?  ?
    5  11   4  10.487  11.771  ? 109.986 138.551  50.221  o  ?  ?  ?  ?
    5  11   5   5.783   5.048  ?  33.449  25.477  46.817  <  ?  ?  ?  ?
    5  11   6  29.104  28.886  ? 847.037 834.420  87.367  o  ?  ?  ?  ?
    5  11   7  13.560  14.602  ? 183.875 213.221  58.316  o  ?  ?  ?  ?
    5  11   8  16.260  17.255  ? 264.403 297.720  69.031  o  ?  ?  ?  ?
    5  11   9   -.027    .510  ?    .001    .260 106.595  <  ?  ?  ?  ?
    5  11  10  18.200  15.972  ? 331.226 255.117 377.415  o  ?  ?  ?  ?
    5  12  -5  12.211  15.353  ? 149.103 235.708 122.271  o  ?  ?  ?  ?
    5  12  -4  27.237  25.287  ? 741.879 639.441 175.746  o  ?  ?  ?  ?
    5  12  -3  13.083   8.778  ? 171.168  77.053  99.161  o  ?  ?  ?  ?
    5  12  -2   8.966   9.183  ?  80.382  84.333  89.666  <  ?  ?  ?  ?
    5  12  -1  11.849  13.367  ? 140.400 178.674  83.975  o  ?  ?  ?  ?
    5  12   0  22.783  24.349  ? 519.084 592.897 115.609  o  ?  ?  ?  ?
    5  12   1  15.421  14.065  ? 237.817 197.824  89.666  o  ?  ?  ?  ?
    5  12   2    .169   3.232  ?    .029  10.448 119.583  <  ?  ?  ?  ?
    5  12   3   5.447   8.811  ?  29.665  77.632 286.368  <  ?  ?  ?  ?
    5  12   4  25.728  22.502  ? 661.934 506.340 406.437  o  ?  ?  ?  ?
    5  12   5  19.411  18.538  ? 376.794 343.648 384.570  o  ?  ?  ?  ?
    5  12   6  17.813  13.262  ? 317.303 175.875 331.434  o  ?  ?  ?  ?
    6   0 -22  26.847  24.605  ? 720.739 605.414 307.418  o  ?  ?  ?  ?
    6   0 -20  10.801  12.087  ? 116.656 146.104 144.843  <  ?  ?  ?  ?
    6   0 -18  52.128  49.639  ? 2717.38 2464.00 436.533  o  ?  ?  ?  ?
    6   0 -16   4.520   7.193  ?  20.434  51.734  76.320  <  ?  ?  ?  ?
    6   0 -14  85.131  82.474  ? 7247.26 6801.97 406.437  o  ?  ?  ?  ?
    6   0 -12   8.441   6.290  ?  71.249  39.566  17.258  o  ?  ?  ?  ?
    6   0 -10  72.102  68.515  ? 5198.64 4694.34 252.297  o  ?  ?  ?  ?
    6   0  -8  91.937  90.757  ? 8452.38 8236.81 478.334  o  ?  ?  ?  ?
    6   0  -6  84.654  79.810  ? 7166.28 6369.59 174.130  o  ?  ?  ?  ?
    6   0  -4 119.378 117.883  ? 14251.1 13896.5 483.693  o  ?  ?  ?  ?
    6   0  -2  30.306  29.642  ? 918.454 878.641  28.902  o  ?  ?  ?  ?
    6   0   0 141.816 140.358  ? 20111.8 19700.4 1361.57  o  ?  ?  ?  ?
    6   0   2  26.608  21.759  ? 707.998 473.466  27.603  o  ?  ?  ?  ?
    6   0   4 164.600 160.331  ? 27093.1 25706.1 1379.66  o  ?  ?  ?  ?
    6   0   6  86.078  74.660  ? 7409.40 5574.10 365.640  o  ?  ?  ?  ?
    6   0   8 105.763  96.694  ? 11185.8 9349.76 553.206  o  ?  ?  ?  ?
    6   0  10  75.642  75.231  ? 5721.65 5659.69 360.982  o  ?  ?  ?  ?
    6   0  12  28.169  29.458  ? 793.498 867.797  85.098  o  ?  ?  ?  ?
    6   0  14  60.176  66.441  ? 3621.15 4414.38 264.076  o  ?  ?  ?  ?
    6   0  16    .137   4.288  ?    .019  18.387 100.381  <  ?  ?  ?  ?
    6   0  18  48.222  48.356  ? 2325.32 2338.35 389.377  o  ?  ?  ?  ?
    6   0  20   9.720  12.521  ?  94.485 156.786 149.288  <  ?  ?  ?  ?
    6   1 -22  18.616  18.315  ? 346.539 335.441 100.381  o  ?  ?  ?  ?
    6   1 -21   7.761   7.110  ?  60.241  50.558  62.108  <  ?  ?  ?  ?
    6   1 -20  31.937  31.663  ? 1019.98 1002.52 107.861  o  ?  ?  ?  ?
    6   1 -19   2.833   1.191  ?   8.027   1.419  31.589  <  ?  ?  ?  ?
    6   1 -18  11.178  13.050  ? 124.940 170.290  35.116  o  ?  ?  ?  ?
    6   1 -17   7.600   8.918  ?  57.761  79.528  22.707  <  ?  ?  ?  ?
    6   1 -16  68.094  65.247  ? 4636.80 4257.23 225.858  o  ?  ?  ?  ?
    6   1 -15  11.815  16.449  ? 139.584 270.585  18.288  o  ?  ?  ?  ?
    6   1 -14  11.867  12.927  ? 140.818 167.106  14.347  o  ?  ?  ?  ?
    6   1 -13   -.181   1.043  ?    .033   1.088   8.599  <  ?  ?  ?  ?
    6   1 -12  88.776  85.779  ? 7881.13 7357.98 266.065  o  ?  ?  ?  ?
    6   1 -11  28.188  31.883  ? 794.578 1016.54  21.557  o  ?  ?  ?  ?
    6   1 -10  44.924  43.395  ? 2018.13 1883.11  41.148  o  ?  ?  ?  ?
    6   1  -9  34.472  31.123  ? 1188.34 968.621  20.438  o  ?  ?  ?  ?
    6   1  -8  98.060  97.282  ? 9615.80 9463.70 199.154  o  ?  ?  ?  ?
    6   1  -7  17.351  12.663  ? 301.065 160.359  10.092  o  ?  ?  ?  ?
    6   1  -6 104.000 100.070  ? 10816.0 10014.1 224.025  o  ?  ?  ?  ?
    6   1  -5  11.086  10.389  ? 122.894 107.923   4.572  o  ?  ?  ?  ?
    6   1  -4  60.263  62.673  ? 3631.60 3927.90  39.595  o  ?  ?  ?  ?
    6   1  -3   5.519   6.203  ?  30.454  38.479   2.523  o  ?  ?  ?  ?
    6   1  -2 131.631 136.188  ? 17326.8 18547.3 416.350  o  ?  ?  ?  ?
    6   1  -1  58.371  57.440  ? 3407.20 3299.36  35.116  o  ?  ?  ?  ?
    6   1   0  23.107  22.377  ? 533.953 500.734   8.961  o  ?  ?  ?  ?
    6   1   1  20.352  21.905  ? 414.197 479.822   8.244  o  ?  ?  ?  ?
    6   1   2 167.708 164.082  ? 28126.0 26923.0 570.583  o  ?  ?  ?  ?
    6   1   3  30.099  30.258  ? 905.965 915.527  16.754  o  ?  ?  ?  ?
    6   1   4  47.161  46.802  ? 2224.12 2190.41  41.148  o  ?  ?  ?  ?
    6   1   5  29.287  31.151  ? 857.732 970.409  20.994  o  ?  ?  ?  ?
    6   1   6 142.656 139.665  ? 20350.9 19506.4 800.069  o  ?  ?  ?  ?
    6   1   7  24.932  18.579  ? 621.611 345.166  18.814  o  ?  ?  ?  ?
    6   1   8  89.161  88.017  ? 7949.69 7747.04 209.634  o  ?  ?  ?  ?
    6   1   9  10.282  12.278  ? 105.713 150.752  14.347  o  ?  ?  ?  ?
    6   1  10  50.843  49.393  ? 2585.02 2439.67  75.256  o  ?  ?  ?  ?
    6   1  11   9.932  16.950  ?  98.635 287.318  20.438  o  ?  ?  ?  ?
    6   1  12  67.043  68.606  ? 4494.72 4706.78 211.407  o  ?  ?  ?  ?
    6   1  13    .270    .339  ?    .073    .115  29.563  <  ?  ?  ?  ?
    6   1  14  17.949  18.064  ? 322.177 326.325  42.730  o  ?  ?  ?  ?
    6   1  15   5.110  10.869  ?  26.115 118.141  37.322  <  ?  ?  ?  ?
    6   1  16  60.575  60.936  ? 3669.34 3713.17 237.010  o  ?  ?  ?  ?
    6   1  17   -.277   1.977  ?    .077   3.907  51.967  <  ?  ?  ?  ?
    6   1  18    .222   5.805  ?    .049  33.694  57.386  <  ?  ?  ?  ?
    6   1  19    .183    .014  ?    .034    .000  57.386  <  ?  ?  ?  ?
    6   1  20  26.133  29.400  ? 682.930 864.347 111.701  o  ?  ?  ?  ?
    6   1  21    .201   5.225  ?    .040  27.300 561.861  <  ?  ?  ?  ?
    6   2 -21   6.501   8.394  ?  42.268  70.457  63.074  <  ?  ?  ?  ?
    6   2 -20  17.342  18.270  ? 300.754 333.777  58.316  o  ?  ?  ?  ?
    6   2 -19  15.113  15.236  ? 228.391 232.132  45.984  o  ?  ?  ?  ?
    6   2 -18  37.210  40.633  ? 1384.58 1651.06 126.357  o  ?  ?  ?  ?
    6   2 -17  14.606  12.945  ? 213.331 167.573  41.935  o  ?  ?  ?  ?
    6   2 -16   -.113   2.623  ?    .013   6.880  18.288  <  ?  ?  ?  ?
    6   2 -15  14.828  14.378  ? 219.880 206.723  25.095  o  ?  ?  ?  ?
    6   2 -14  75.513  73.028  ? 5702.22 5333.14 204.360  o  ?  ?  ?  ?
    6   2 -13  20.214  23.973  ? 408.601 574.692  18.814  o  ?  ?  ?  ?
    6   2 -12  42.642  40.615  ? 1818.31 1649.59  45.160  o  ?  ?  ?  ?
    6   2 -11  10.851   8.742  ? 117.748  76.418  11.290  o  ?  ?  ?  ?
    6   2 -10  93.765  93.876  ? 8791.87 8812.62 286.368  o  ?  ?  ?  ?
    6   2  -9  40.434  39.999  ? 1634.89 1599.93  34.396  o  ?  ?  ?  ?
    6   2  -8 104.289 100.249  ? 10876.3 10049.9 237.010  o  ?  ?  ?  ?
    6   2  -7    .130   1.308  ?    .017   1.710   8.244  <  ?  ?  ?  ?
    6   2  -6  83.695  83.597  ? 7004.83 6988.43 188.943  o  ?  ?  ?  ?
    6   2  -5  31.179  32.628  ? 972.108 1064.56  26.334  o  ?  ?  ?  ?
    6   2  -4 121.514 123.195  ? 14765.6 15177.1 349.468  o  ?  ?  ?  ?
    6   2  -3  45.393  42.964  ? 2060.54 1845.94  35.116  o  ?  ?  ?  ?
    6   2  -2  38.221  35.811  ? 1460.83 1282.45  23.293  o  ?  ?  ?  ?
    6   2  -1  31.695  32.275  ? 1004.55 1041.67  17.258  o  ?  ?  ?  ?
    6   2   0 148.526 149.038  ? 22060.1 22212.3 725.842  o  ?  ?  ?  ?
    6   2   1  45.837  45.259  ? 2101.05 2048.37  30.231  o  ?  ?  ?  ?
    6   2   2  10.872  14.642  ? 118.210 214.378   5.972  o  ?  ?  ?  ?
    6   2   3  42.569  46.231  ? 1812.11 2137.28  29.563  o  ?  ?  ?  ?
    6   2   4 120.364 120.106  ? 14487.5 14425.5 333.663  o  ?  ?  ?  ?
    6   2   5  46.821  46.602  ? 2192.24 2171.70  45.160  o  ?  ?  ?  ?
    6   2   6  61.210  68.309  ? 3746.66 4666.14  89.666  o  ?  ?  ?  ?
    6   2   7  14.862  15.369  ? 220.876 236.193  12.126  o  ?  ?  ?  ?
    6   2   8  68.796  70.530  ? 4732.95 4974.47 180.639  o  ?  ?  ?  ?
    6   2   9  19.352  20.906  ? 374.499 437.055  18.814  o  ?  ?  ?  ?
    6   2  10  79.048  77.976  ? 6248.59 6080.26 322.597  o  ?  ?  ?  ?
    6   2  11   2.726   2.796  ?   7.432   7.817  18.814  <  ?  ?  ?  ?
    6   2  12  25.535  26.491  ? 652.055 701.795  45.160  o  ?  ?  ?  ?
    6   2  13  22.790  26.342  ? 519.396 693.885  45.984  o  ?  ?  ?  ?
    6   2  14  70.949  68.127  ? 5033.76 4641.25 403.977  o  ?  ?  ?  ?
    6   2  15    .501   5.569  ?    .251  31.011  35.844  <  ?  ?  ?  ?
    6   2  16   9.793  13.313  ?  95.909 177.239  42.730  o  ?  ?  ?  ?
    6   2  17   9.007   8.528  ?  81.122  72.735  43.532  <  ?  ?  ?  ?
    6   2  18  35.740  37.582  ? 1277.33 1412.39 130.511  o  ?  ?  ?  ?
    6   2  19    .461   7.868  ?    .213  61.904  69.031  <  ?  ?  ?  ?
    6   2  20   8.770  11.459  ?  76.912 131.317  78.470  <  ?  ?  ?  ?
    6   2  21    .174   3.182  ?    .030  10.122 544.618  <  ?  ?  ?  ?
    6   3 -21  11.382  15.143  ? 129.559 229.310  77.391  o  ?  ?  ?  ?
    6   3 -20  25.364  27.655  ? 643.354 764.807 112.996  o  ?  ?  ?  ?
    6   3 -19   5.005   8.351  ?  25.048  69.746  70.050  <  ?  ?  ?  ?
    6   3 -18   7.973   6.805  ?  63.573  46.310  72.110  <  ?  ?  ?  ?
    6   3 -17  21.379  24.129  ? 457.082 582.207  57.386  o  ?  ?  ?  ?
    6   3 -16  41.710  46.869  ? 1739.76 2196.74 131.911  o  ?  ?  ?  ?
    6   3 -15  26.783  27.918  ? 717.352 779.389  69.031  o  ?  ?  ?  ?
    6   3 -14  11.054  10.792  ? 122.198 116.470  23.886  o  ?  ?  ?  ?
    6   3 -13   9.476  10.865  ?  89.799 118.057  18.288  o  ?  ?  ?  ?
    6   3 -12  65.828  67.641  ? 4333.28 4575.36 134.733  o  ?  ?  ?  ?
    6   3 -11  42.729  43.110  ? 1825.80 1858.45  51.967  o  ?  ?  ?  ?
    6   3 -10  66.986  63.441  ? 4487.08 4024.71 235.132  o  ?  ?  ?  ?
    6   3  -9  13.459  15.847  ? 181.146 251.119  18.814  o  ?  ?  ?  ?
    6   3  -8  79.882  78.766  ? 6381.11 6204.04 192.317  o  ?  ?  ?  ?
    6   3  -7  69.721  70.945  ? 4861.00 5033.24 182.284  o  ?  ?  ?  ?
    6   3  -6 103.385 106.024  ? 10688.4 11241.1 389.377  o  ?  ?  ?  ?
    6   3  -5  10.450  13.099  ? 109.196 171.572  10.883  o  ?  ?  ?  ?
    6   3  -4  62.294  57.904  ? 3880.49 3352.93  96.742  o  ?  ?  ?  ?
    6   3  -3  54.357  53.075  ? 2954.66 2816.91  80.649  o  ?  ?  ?  ?
    6   3  -2 117.763 118.261  ? 13868.1 13985.8 459.811  o  ?  ?  ?  ?
    6   3  -1  48.029  54.822  ? 2306.76 3005.42  45.984  o  ?  ?  ?  ?
    6   3   0  32.432  29.950  ? 1051.81 897.014  14.813  o  ?  ?  ?  ?
    6   3   1  53.188  52.188  ? 2828.93 2723.60  41.935  o  ?  ?  ?  ?
    6   3   2 118.997 119.720  ? 14160.3 14332.8 597.152  o  ?  ?  ?  ?
    6   3   3  66.404  65.778  ? 4409.48 4326.80  90.827  o  ?  ?  ?  ?
    6   3   4  24.139  26.539  ? 582.681 704.327  15.287  o  ?  ?  ?  ?
    6   3   5  21.867  23.593  ? 478.156 556.618  15.769  o  ?  ?  ?  ?
    6   3   6  84.120  82.884  ? 7076.17 6869.78 183.938  o  ?  ?  ?  ?
    6   3   7  53.062  58.897  ? 2815.62 3468.88  78.470  o  ?  ?  ?  ?
    6   3   8  51.645  50.311  ? 2667.23 2531.17  78.470  o  ?  ?  ?  ?
    6   3   9   5.002   4.395  ?  25.023  19.315  16.257  <  ?  ?  ?  ?
    6   3  10  34.382  37.174  ? 1182.15 1381.88  47.656  o  ?  ?  ?  ?
    6   3  11  48.716  46.353  ? 2373.22 2148.57  88.513  o  ?  ?  ?  ?
    6   3  12  65.400  66.009  ? 4277.12 4357.20 166.161  o  ?  ?  ?  ?
    6   3  13  19.686  17.363  ? 387.552 301.476  39.595  o  ?  ?  ?  ?
    6   3  14  17.576  18.128  ? 308.907 328.635  38.830  o  ?  ?  ?  ?
    6   3  15  16.666  16.576  ? 277.760 274.762  43.532  o  ?  ?  ?  ?
    6   3  16  43.837  45.938  ? 1921.71 2110.28 159.921  o  ?  ?  ?  ?
    6   3  17  18.319  19.804  ? 335.570 392.196  54.643  o  ?  ?  ?  ?
    6   3  18    .223    .384  ?    .050    .147  47.656  <  ?  ?  ?  ?
    6   3  19  11.515  10.544  ? 132.606 111.184  71.076  o  ?  ?  ?  ?
    6   3  20  20.668  24.459  ? 427.165 598.262 137.584  o  ?  ?  ?  ?
    6   4 -20  11.117   8.147  ? 123.581  66.373  87.367  o  ?  ?  ?  ?
    6   4 -19  19.611  22.608  ? 384.597 511.110 122.271  o  ?  ?  ?  ?
    6   4 -18  28.511  29.911  ? 812.869 894.684 175.746  o  ?  ?  ?  ?
    6   4 -16   3.593   1.880  ?  12.907   3.535  31.589  <  ?  ?  ?  ?
    6   4 -15  18.046  21.098  ? 325.645 445.141  46.817  o  ?  ?  ?  ?
    6   4 -14  49.343  54.153  ? 2434.73 2932.50 166.161  o  ?  ?  ?  ?
    6   4 -13  34.968  38.376  ? 1222.78 1472.68  93.171  o  ?  ?  ?  ?
    6   4 -12  15.502  13.782  ? 240.315 189.945  23.886  o  ?  ?  ?  ?
    6   4 -11  13.582  15.112  ? 184.472 228.361  18.814  o  ?  ?  ?  ?
    6   4 -10  51.569  49.782  ? 2659.34 2478.25  88.513  o  ?  ?  ?  ?
    6   4  -9  73.932  75.720  ? 5465.89 5733.52 274.097  o  ?  ?  ?  ?
    6   4  -8  54.229  56.003  ? 2940.82 3136.39 114.299  o  ?  ?  ?  ?
    6   4  -7   4.625   9.179  ?  21.392  84.257  11.704  <  ?  ?  ?  ?
    6   4  -6  62.250  63.542  ? 3875.12 4037.59 122.271  o  ?  ?  ?  ?
    6   4  -5  99.024  95.734  ? 9805.75 9164.93 284.304  o  ?  ?  ?  ?
    6   4  -4 105.153 102.721  ? 11057.1 10551.6 338.141  o  ?  ?  ?  ?
    6   4  -3  21.495  26.953  ? 462.047 726.477  20.438  o  ?  ?  ?  ?
    6   4  -2  37.787  41.953  ? 1427.83 1760.02  41.935  o  ?  ?  ?  ?
    6   4  -1  81.708  83.694  ? 6676.26 7004.67 222.200  o  ?  ?  ?  ?
    6   4   0 103.079 101.911  ? 10625.2 10385.9 311.717  o  ?  ?  ?  ?
    6   4   1  43.797  50.069  ? 1918.17 2506.94  41.148  o  ?  ?  ?  ?
    6   4   2   7.286   8.358  ?  53.080  69.860   9.331  o  ?  ?  ?  ?
    6   4   3  52.295  56.685  ? 2734.76 3213.19  64.048  o  ?  ?  ?  ?
    6   4   4  74.778  75.539  ? 5591.73 5706.08 140.465  o  ?  ?  ?  ?
    6   4   5  56.750  55.781  ? 3220.61 3111.53  71.076  o  ?  ?  ?  ?
    6   4   6  62.994  63.749  ? 3968.18 4063.90 124.988  o  ?  ?  ?  ?
    6   4   7   9.527  13.187  ?  90.754 173.894  17.258  o  ?  ?  ?  ?
    6   4   8  63.964  70.107  ? 4091.42 4915.04 146.317  o  ?  ?  ?  ?
    6   4   9  74.890  76.914  ? 5608.49 5915.82 274.097  o  ?  ?  ?  ?
    6   4  10  44.247  45.438  ? 1957.76 2064.60  81.750  o  ?  ?  ?  ?
    6   4  11  19.296  17.664  ? 372.338 312.011  31.589  o  ?  ?  ?  ?
    6   4  12  20.398  23.331  ? 416.097 544.332  35.844  o  ?  ?  ?  ?
    6   4  13  48.419  47.346  ? 2344.35 2241.63 136.154  o  ?  ?  ?  ?
    6   4  14  40.549  41.352  ? 1644.20 1709.97 146.317  o  ?  ?  ?  ?
    6   4  15  25.883  27.504  ? 669.918 756.484  77.391  o  ?  ?  ?  ?
    6   4  16   -.072   1.961  ?    .005   3.847  45.160  <  ?  ?  ?  ?
    6   4  17  19.313  18.756  ? 372.974 351.779  65.030  o  ?  ?  ?  ?
    6   4  18  28.126  28.483  ? 791.080 811.273  96.742  o  ?  ?  ?  ?
    6   4  19  18.436  20.545  ? 339.882 422.114  82.859  o  ?  ?  ?  ?
    6   4  20    .319   7.105  ?    .102  50.476 282.248  <  ?  ?  ?  ?
    6   5 -19   6.952   7.743  ?  48.326  59.947  73.151  <  ?  ?  ?  ?
    6   5 -18   8.195   3.368  ?  67.162  11.345  46.817  <  ?  ?  ?  ?
    6   5 -17  20.312  23.474  ? 412.558 551.038  66.019  o  ?  ?  ?  ?
    6   5 -16  28.665  27.261  ? 821.673 743.147  89.666  o  ?  ?  ?  ?
    6   5 -15  23.042  26.290  ? 530.942 691.143  67.015  o  ?  ?  ?  ?
    6   5 -14   3.211   2.914  ?  10.313   8.490  31.589  <  ?  ?  ?  ?
    6   5 -13  15.072  15.401  ? 227.179 237.184  44.342  o  ?  ?  ?  ?
    6   5 -12  41.738  43.780  ? 1742.05 1916.70 126.357  o  ?  ?  ?  ?
    6   5 -11  58.505  61.415  ? 3422.87 3771.86 209.634  o  ?  ?  ?  ?
    6   5 -10  19.659  23.894  ? 386.470 570.931  39.595  o  ?  ?  ?  ?
    6   5  -9  15.530  15.326  ? 241.174 234.873  21.557  o  ?  ?  ?  ?
    6   5  -8  32.418  33.401  ? 1050.92 1115.63  35.116  o  ?  ?  ?  ?
    6   5  -7  80.980  83.760  ? 6557.71 7015.70 175.746  o  ?  ?  ?  ?
    6   5  -6  44.693  49.635  ? 1997.48 2463.63  55.550  o  ?  ?  ?  ?
    6   5  -5   9.483  10.381  ?  89.936 107.763  12.126  o  ?  ?  ?  ?
    6   5  -4  29.084  31.645  ? 845.900 1001.42  26.334  o  ?  ?  ?  ?
    6   5  -3  65.805  62.303  ? 4330.25 3881.70 104.087  o  ?  ?  ?  ?
    6   5  -2  63.252  62.172  ? 4000.88 3865.37  97.948  o  ?  ?  ?  ?
    6   5  -1  70.619  70.760  ? 4987.11 5006.95 120.923  o  ?  ?  ?  ?
    6   5   0    .210   6.339  ?    .044  40.185  13.436  <  ?  ?  ?  ?
    6   5   1  69.284  69.750  ? 4800.26 4865.12 111.701  o  ?  ?  ?  ?
    6   5   2  74.188  70.214  ? 5503.92 4929.97 120.923  o  ?  ?  ?  ?
    6   5   3  63.526  63.431  ? 4035.58 4023.55  81.750  o  ?  ?  ?  ?
    6   5   4  34.046  37.330  ? 1159.13 1393.54  26.965  o  ?  ?  ?  ?
    6   5   5  21.136  23.362  ? 446.736 545.782  21.557  o  ?  ?  ?  ?
    6   5   6  42.730  43.931  ? 1825.88 1929.90  88.513  o  ?  ?  ?  ?
    6   5   7  52.728  51.963  ? 2780.21 2700.15 123.625  o  ?  ?  ?  ?
    6   5   8  43.170  46.683  ? 1863.62 2179.26  68.019  o  ?  ?  ?  ?
    6   5   9  23.065  20.032  ? 531.979 401.262  35.844  o  ?  ?  ?  ?
    6   5  10  36.932  38.362  ? 1363.97 1471.61  62.108  o  ?  ?  ?  ?
    6   5  11  60.544  61.484  ? 3665.59 3780.30 195.720  o  ?  ?  ?  ?
    6   5  12  33.727  35.833  ? 1137.49 1284.04  63.074  o  ?  ?  ?  ?
    6   5  13  22.736  23.990  ? 516.943 575.497  41.148  o  ?  ?  ?  ?
    6   5  14    .310   3.755  ?    .096  14.098  37.322  <  ?  ?  ?  ?
    6   5  15  32.746  32.709  ? 1072.28 1069.86 106.595  o  ?  ?  ?  ?
    6   5  16  24.592  24.398  ? 604.780 595.256  76.320  o  ?  ?  ?  ?
    6   5  17  20.177  21.360  ? 407.119 456.263  73.151  o  ?  ?  ?  ?
    6   5  18   7.507   3.301  ?  56.362  10.899  62.108  <  ?  ?  ?  ?
    6   5  19  12.206  12.871  ? 148.980 165.652 137.584  <  ?  ?  ?  ?
    6   6 -19  26.575  24.574  ? 706.236 603.861 233.263  o  ?  ?  ?  ?
    6   6 -18  12.981  13.731  ? 168.504 188.533  60.197  o  ?  ?  ?  ?
    6   6 -17  21.494  22.338  ? 462.010 498.976  75.256  o  ?  ?  ?  ?
    6   6 -16    .056   1.908  ?    .003   3.641  40.367  <  ?  ?  ?  ?
    6   6 -15  23.264  26.654  ? 541.221 710.445  72.110  o  ?  ?  ?  ?
    6   6 -14  26.984  27.177  ? 728.118 738.567  82.859  o  ?  ?  ?  ?
    6   6 -13  44.235  46.500  ? 1956.70 2162.27 159.921  o  ?  ?  ?  ?
    6   6 -12   -.409    .131  ?    .168    .017  34.396  <  ?  ?  ?  ?
    6   6 -11  14.960  18.344  ? 223.794 336.519  38.072  o  ?  ?  ?  ?
    6   6 -10  23.280  24.969  ? 541.966 623.470  44.342  o  ?  ?  ?  ?
    6   6  -9  56.799  57.148  ? 3226.09 3265.91 172.521  o  ?  ?  ?  ?
    6   6  -8  11.428  11.823  ? 130.599 139.794  22.128  o  ?  ?  ?  ?
    6   6  -7    .167   5.895  ?    .028  34.756  17.769  <  ?  ?  ?  ?
    6   6  -6  16.956  17.484  ? 287.501 305.688  21.557  o  ?  ?  ?  ?
    6   6  -5  66.539  70.682  ? 4427.45 4996.00 129.119  o  ?  ?  ?  ?
    6   6  -4   9.883  14.433  ?  97.672 208.312  17.769  o  ?  ?  ?  ?
    6   6  -3  50.998  53.647  ? 2600.83 2877.97  85.098  o  ?  ?  ?  ?
    6   6  -2  10.582  12.603  ? 111.969 158.841  20.994  o  ?  ?  ?  ?
    6   6  -1  70.461  68.838  ? 4964.77 4738.70 146.317  o  ?  ?  ?  ?
    6   6   0  54.687  53.937  ? 2990.68 2909.15 100.381  o  ?  ?  ?  ?
    6   6   1  63.025  61.471  ? 3972.09 3778.64 123.625  o  ?  ?  ?  ?
    6   6   2   8.960   6.773  ?  80.281  45.874  12.992  o  ?  ?  ?  ?
    6   6   3  30.413  29.943  ? 924.952 896.563  29.563  o  ?  ?  ?  ?
    6   6   4  43.960  45.324  ? 1932.48 2054.28  73.151  o  ?  ?  ?  ?
    6   6   5  62.595  65.964  ? 3918.16 4351.20 182.284  o  ?  ?  ?  ?
    6   6   6  16.083  17.754  ? 258.657 315.191  33.683  o  ?  ?  ?  ?
    6   6   7   9.916   9.742  ?  98.327  94.903  30.231  o  ?  ?  ?  ?
    6   6   8  31.029  31.114  ? 962.769 968.085  72.110  o  ?  ?  ?  ?
    6   6   9  65.382  64.759  ? 4274.79 4193.71 465.066  o  ?  ?  ?  ?
    6   6  10  22.504  21.954  ? 506.423 481.988  54.643  o  ?  ?  ?  ?
    6   6  11   9.560   9.795  ?  91.393  95.935  36.579  o  ?  ?  ?  ?
    6   6  12  13.924  15.277  ? 193.881 233.383  29.563  o  ?  ?  ?  ?
    6   6  13  38.112  38.068  ? 1452.51 1449.20  79.556  o  ?  ?  ?  ?
    6   6  14  17.506  19.439  ? 306.452 377.874  39.595  o  ?  ?  ?  ?
    6   6  15  19.933  19.890  ? 397.317 395.606  59.252  o  ?  ?  ?  ?
    6   6  16   -.040   1.436  ?    .002   2.063  54.643  <  ?  ?  ?  ?
    6   6  17  16.793  18.076  ? 282.020 326.760  73.151  o  ?  ?  ?  ?
    6   6  18  11.536  12.976  ? 133.082 168.383 127.735  <  ?  ?  ?  ?
    6   7 -18   6.470   4.873  ?  41.863  23.746 144.843  <  ?  ?  ?  ?
    6   7 -17  23.867  24.398  ? 569.617 595.284  90.827  o  ?  ?  ?  ?
    6   7 -16  11.580  13.135  ? 134.093 172.515  53.744  o  ?  ?  ?  ?
    6   7 -15  28.058  26.772  ? 787.229 716.733 101.609  o  ?  ?  ?  ?
    6   7 -14   6.080    .959  ?  36.964    .920  43.532  <  ?  ?  ?  ?
    6   7 -13  25.393  25.793  ? 644.828 665.301  73.151  o  ?  ?  ?  ?
    6   7 -12  18.697  19.943  ? 349.573 397.726  57.386  o  ?  ?  ?  ?
    6   7 -11  53.458  54.316  ? 2857.73 2950.18 235.132  o  ?  ?  ?  ?
    6   7 -10   4.439   5.121  ?  19.708  26.226  37.322  <  ?  ?  ?  ?
    6   7  -9  12.479   9.739  ? 155.718  94.843  38.072  o  ?  ?  ?  ?
    6   7  -8  13.106  12.512  ? 171.765 156.541  25.095  o  ?  ?  ?  ?
    6   7  -7  64.488  64.591  ? 4158.65 4171.99 164.590  o  ?  ?  ?  ?
    6   7  -6  17.351  16.487  ? 301.062 271.816  32.280  o  ?  ?  ?  ?
    6   7  -5  17.091  19.458  ? 292.096 378.605  30.231  o  ?  ?  ?  ?
    6   7  -4   5.283   6.518  ?  27.908  42.480  20.994  <  ?  ?  ?  ?
    6   7  -3  78.690  78.921  ? 6192.04 6228.54 204.360  o  ?  ?  ?  ?
    6   7  -2  34.216  33.146  ? 1170.73 1098.64  53.744  o  ?  ?  ?  ?
    6   7  -1  42.144  42.515  ? 1776.08 1807.55  72.110  o  ?  ?  ?  ?
    6   7   0    .095   2.493  ?    .009   6.214  20.438  <  ?  ?  ?  ?
    6   7   1  47.670  48.834  ? 2272.43 2384.79  86.229  o  ?  ?  ?  ?
    6   7   2  26.915  28.089  ? 724.441 789.003  41.148  o  ?  ?  ?  ?
    6   7   3  66.876  68.114  ? 4472.40 4639.48 192.317  o  ?  ?  ?  ?
    6   7   4  13.113  12.813  ? 171.962 164.183  31.589  o  ?  ?  ?  ?
    6   7   5  23.440  23.845  ? 549.417 568.577  48.504  o  ?  ?  ?  ?
    6   7   6  15.798  13.551  ? 249.568 183.621  36.579  o  ?  ?  ?  ?
    6   7   7  75.025  75.787  ? 5628.70 5743.63 303.148  o  ?  ?  ?  ?
    6   7   8  15.136  14.392  ? 229.085 207.134  42.730  o  ?  ?  ?  ?
    6   7   9   9.063   8.110  ?  82.143  65.771  39.595  o  ?  ?  ?  ?
    6   7  10  15.852  18.102  ? 251.287 327.683  45.984  o  ?  ?  ?  ?
    6   7  11  51.946  50.603  ? 2698.40 2560.63 231.400  o  ?  ?  ?  ?
    6   7  12  14.856  14.470  ? 220.714 209.378  51.967  o  ?  ?  ?  ?
    6   7  13  14.633  14.481  ? 214.122 209.700  54.643  o  ?  ?  ?  ?
    6   7  14   -.116    .893  ?    .013    .797  48.504  <  ?  ?  ?  ?
    6   7  15  25.503  27.050  ? 650.394 731.680 123.625  o  ?  ?  ?  ?
    6   7  16   9.661  10.854  ?  93.337 117.802  75.256  <  ?  ?  ?  ?
    6   8 -16   1.765   2.195  ?   3.114   4.819 129.119  <  ?  ?  ?  ?
    6   8 -15  23.657  23.848  ? 559.641 568.712  87.367  o  ?  ?  ?  ?
    6   8 -14   4.708   3.957  ?  22.168  15.661  41.935  <  ?  ?  ?  ?
    6   8 -13  31.056  32.306  ? 964.473 1043.69 122.271  o  ?  ?  ?  ?
    6   8 -12    .007   5.146  ?    .000  26.483  43.532  <  ?  ?  ?  ?
    6   8 -11  17.337  17.874  ? 300.587 319.494  69.031  o  ?  ?  ?  ?
    6   8 -10  10.201  10.694  ? 104.067 114.355  49.358  o  ?  ?  ?  ?
    6   8  -9  50.600  51.535  ? 2560.41 2655.83 242.686  o  ?  ?  ?  ?
    6   8  -8   9.983  13.037  ?  99.661 169.974  41.935  o  ?  ?  ?  ?
    6   8  -7    .129   1.502  ?    .017   2.256  23.886  <  ?  ?  ?  ?
    6   8  -6   6.667  11.186  ?  44.448 125.126  28.902  <  ?  ?  ?  ?
    6   8  -5  64.926  62.570  ? 4215.42 3915.02 195.720  o  ?  ?  ?  ?
    6   8  -4   8.041   8.820  ?  64.652  77.796  30.231  <  ?  ?  ?  ?
    6   8  -3  32.984  33.135  ? 1087.97 1097.94  73.151  o  ?  ?  ?  ?
    6   8  -2   3.693   4.850  ?  13.638  23.524  25.711  <  ?  ?  ?  ?
    6   8  -1  64.365  63.285  ? 4142.81 4004.95 156.846  o  ?  ?  ?  ?
    6   8   0  11.465  12.539  ? 131.447 157.215  30.231  o  ?  ?  ?  ?
    6   8   1  60.757  60.939  ? 3691.43 3713.52 143.376  o  ?  ?  ?  ?
    6   8   2    .073   3.687  ?    .005  13.591  26.334  <  ?  ?  ?  ?
    6   8   3  33.887  33.944  ? 1148.31 1152.22  78.470  o  ?  ?  ?  ?
    6   8   4   3.593   3.353  ?  12.908  11.242  32.280  <  ?  ?  ?  ?
    6   8   5  64.916  63.058  ? 4214.14 3976.28 250.360  o  ?  ?  ?  ?
    6   8   6   7.063   9.580  ?  49.883  91.780  35.116  <  ?  ?  ?  ?
    6   8   7  15.545  18.543  ? 241.646 343.851  46.817  o  ?  ?  ?  ?
    6   8   8   4.052   5.578  ?  16.417  31.114  38.072  <  ?  ?  ?  ?
    6   8   9  58.854  55.898  ? 3463.77 3124.64 340.392  o  ?  ?  ?  ?
    6   8  10   7.123   5.316  ?  50.736  28.260  51.090  <  ?  ?  ?  ?
    6   8  11   7.680   7.038  ?  58.982  49.540  51.090  <  ?  ?  ?  ?
    6   8  12   3.793    .397  ?  14.384    .157  48.504  <  ?  ?  ?  ?
    6   8  13  33.063  33.519  ? 1093.17 1123.55 115.609  o  ?  ?  ?  ?
    6   8  14    .170   7.364  ?    .029  54.222  55.550  <  ?  ?  ?  ?
    6   8  15  17.444  15.793  ? 304.303 249.416 164.590  o  ?  ?  ?  ?
    6   9 -13  16.684  17.595  ? 278.371 309.597  79.556  o  ?  ?  ?  ?
    6   9 -12   7.277   5.536  ?  52.961  30.650  56.464  <  ?  ?  ?  ?
    6   9 -11  36.912  38.270  ? 1362.52 1464.58 159.921  o  ?  ?  ?  ?
    6   9 -10   3.868    .653  ?  14.964    .426  51.967  <  ?  ?  ?  ?
    6   9  -9   6.149   3.623  ?  37.805  13.123  56.464  <  ?  ?  ?  ?
    6   9  -8   4.431    .600  ?  19.633    .360  56.464  <  ?  ?  ?  ?
    6   9  -7  47.335  48.764  ? 2240.62 2377.93 126.357  o  ?  ?  ?  ?
    6   9  -6    .131   2.840  ?    .017   8.063  29.563  <  ?  ?  ?  ?
    6   9  -5  12.787  13.399  ? 163.501 179.535  38.072  o  ?  ?  ?  ?
    6   9  -4   -.063    .155  ?    .004    .024  35.844  <  ?  ?  ?  ?
    6   9  -3  58.323  55.591  ? 3401.63 3090.35 187.267  o  ?  ?  ?  ?
    6   9  -2   2.716   2.786  ?   7.374   7.762  35.844  <  ?  ?  ?  ?
    6   9  -1  41.053  40.580  ? 1685.32 1646.72 112.996  o  ?  ?  ?  ?
    6   9   0   7.435   4.775  ?  55.286  22.801  29.563  <  ?  ?  ?  ?
    6   9   1  41.707  41.485  ? 1739.46 1721.00  87.367  o  ?  ?  ?  ?
    6   9   2   6.897   5.047  ?  47.567  25.468  37.322  <  ?  ?  ?  ?
    6   9   3  44.145  45.687  ? 1948.75 2087.31 163.026  o  ?  ?  ?  ?
    6   9   4   9.074   7.709  ?  82.329  59.426  39.595  o  ?  ?  ?  ?
    6   9   5  18.171  16.919  ? 330.199 286.247  51.090  o  ?  ?  ?  ?
    6   9   6   3.461   5.144  ?  11.978  26.457  36.579  <  ?  ?  ?  ?
    6   9   7  48.432  45.377  ? 2345.67 2059.09 164.590  o  ?  ?  ?  ?
    6   9   8    .054   2.652  ?    .003   7.035  43.532  <  ?  ?  ?  ?
    6   9   9    .065   3.185  ?    .004  10.141  44.342  <  ?  ?  ?  ?
    6   9  10    .033   1.894  ?    .001   3.587  57.386  <  ?  ?  ?  ?
    6   9  11  37.868  36.844  ? 1434.01 1357.49 146.317  o  ?  ?  ?  ?
    6   9  12   2.930    .923  ?   8.583    .852  59.252  <  ?  ?  ?  ?
    6   9  13  12.319  13.921  ? 151.765 193.794 146.317  <  ?  ?  ?  ?
    6  10 -10   5.574   4.146  ?  31.064  17.190  59.252  <  ?  ?  ?  ?
    6  10  -9  35.424  37.261  ? 1254.88 1388.35 174.130  o  ?  ?  ?  ?
    6  10  -8    .275   7.119  ?    .076  50.673  62.108  <  ?  ?  ?  ?
    6  10  -7   1.961   2.457  ?   3.844   6.039  44.342  <  ?  ?  ?  ?
    6  10  -6   -.218    .054  ?    .048    .003  33.683  <  ?  ?  ?  ?
    6  10  -5  43.391  42.073  ? 1882.81 1770.17 130.511  o  ?  ?  ?  ?
    6  10  -4  10.703  12.105  ? 114.548 146.527  44.342  o  ?  ?  ?  ?
    6  10  -3  12.687  12.182  ? 160.970 148.409  48.504  o  ?  ?  ?  ?
    6  10  -2   2.591   3.436  ?   6.715  11.805  41.935  <  ?  ?  ?  ?
    6  10  -1  33.689  33.792  ? 1134.94 1141.87  93.171  o  ?  ?  ?  ?
    6  10   0   1.991   6.080  ?   3.964  36.966  41.935  <  ?  ?  ?  ?
    6  10   1  34.152  34.263  ? 1166.34 1173.92 130.511  o  ?  ?  ?  ?
    6  10   2   1.512   7.162  ?   2.286  51.299  36.579  <  ?  ?  ?  ?
    6  10   3  21.073  20.640  ? 444.072 426.017  61.148  o  ?  ?  ?  ?
    6  10   4  10.801  10.781  ? 116.657 116.226  49.358  o  ?  ?  ?  ?
    6  10   5  36.956  36.020  ? 1365.76 1297.43 115.609  o  ?  ?  ?  ?
    6  10   6   7.813   7.084  ?  61.037  50.176  45.984  <  ?  ?  ?  ?
    6  10   7    .253   4.675  ?    .064  21.859  49.358  <  ?  ?  ?  ?
    6  10   8   4.540   5.898  ?  20.616  34.781  52.852  <  ?  ?  ?  ?
    6  10   9  34.519  32.966  ? 1191.57 1086.75 124.988  o  ?  ?  ?  ?
    6  10  10   6.326   4.233  ?  40.016  17.920  69.031  <  ?  ?  ?  ?
    6  10  11   8.193   8.205  ?  67.126  67.318 280.199  <  ?  ?  ?  ?
    6  11  -7  28.303  28.571  ? 801.058 816.291 386.970  o  ?  ?  ?  ?
    6  11  -6  14.602  12.371  ? 213.211 153.041  66.019  o  ?  ?  ?  ?
    6  11  -5    .321   6.573  ?    .103  43.198  52.852  <  ?  ?  ?  ?
    6  11  -4   6.902   6.222  ?  47.631  38.712  49.358  <  ?  ?  ?  ?
    6  11  -3  30.436  31.040  ? 926.344 963.492 100.381  o  ?  ?  ?  ?
    6  11  -2  15.038  15.099  ? 226.143 227.985  64.048  o  ?  ?  ?  ?
    6  11  -1  15.767  17.381  ? 248.601 302.109  65.030  o  ?  ?  ?  ?
    6  11   0   8.537   6.518  ?  72.880  42.487  68.019  <  ?  ?  ?  ?
    6  11   1  18.856  19.817  ? 355.559 392.726  87.367  o  ?  ?  ?  ?
    6  11   2  11.888  11.257  ? 141.319 126.728  75.256  o  ?  ?  ?  ?
    6  11   3  27.044  25.813  ? 731.385 666.289 122.271  o  ?  ?  ?  ?
    6  11   4   6.862   7.109  ?  47.081  50.544  51.090  <  ?  ?  ?  ?
    6  11   5   6.698   9.459  ?  44.861  89.472  57.386  <  ?  ?  ?  ?
    6  11   6   8.754  10.039  ?  76.638 100.781  86.229  <  ?  ?  ?  ?
    6  11   7  24.459  26.173  ? 598.252 685.019 211.407  o  ?  ?  ?  ?
    6  11   8   7.485   5.675  ?  56.030  32.205 134.733  <  ?  ?  ?  ?
    6  12  -3  10.956   9.528  ? 120.029  90.776 211.407  <  ?  ?  ?  ?
    6  12  -2   9.616   7.288  ?  92.475  53.110 192.317  <  ?  ?  ?  ?
    6  12  -1  19.038  18.173  ? 362.450 330.256 423.862  o  ?  ?  ?  ?
    7   0 -17  22.006  23.441  ? 484.270 549.474 141.917  o  ?  ?  ?  ?
    7   0 -15  33.733  30.824  ? 1137.89 950.090 101.609  o  ?  ?  ?  ?
    7   0 -13  82.065  73.843  ? 6734.72 5452.75 401.525  o  ?  ?  ?  ?
    7   0 -11  19.800  27.127  ? 392.060 735.881  26.334  o  ?  ?  ?  ?
    7   0  -9  97.894  99.546  ? 9583.33 9909.39 305.279  o  ?  ?  ?  ?
    7   0  -7  14.122   6.712  ? 199.438  45.055  19.348  o  ?  ?  ?  ?
    7   0  -5 119.368 122.557  ? 14248.7 15020.3 457.195  o  ?  ?  ?  ?
    7   0  -1  97.434 104.909  ? 9493.40 11005.8 462.435  o  ?  ?  ?  ?
    7   0   1  98.469 100.403  ? 9696.20 10080.8 235.132  o  ?  ?  ?  ?
    7   0   3  92.118  91.156  ? 8485.68 8309.36 384.570  o  ?  ?  ?  ?
    7   0   5 105.625 103.490  ? 11156.6 10710.1 579.372  o  ?  ?  ?  ?
    7   0   9 110.546 106.801  ? 12220.4 11406.4 508.180  o  ?  ?  ?  ?
    7   0  11  21.754  18.788  ? 473.228 352.996  68.019  o  ?  ?  ?  ?
    7   0  13  74.157  69.046  ? 5499.29 4767.31 384.570  o  ?  ?  ?  ?
    7   0  15  33.375  34.292  ? 1113.87 1175.95 197.433  o  ?  ?  ?  ?
    7   0  17  29.814  32.760  ? 888.892 1073.20 187.267  o  ?  ?  ?  ?
    7   0  19  27.276  29.832  ? 744.003 889.977 213.187  o  ?  ?  ?  ?
    7   1 -21  30.705  29.199  ? 942.797 852.583 349.468  o  ?  ?  ?  ?
    7   1 -20    .253   3.485  ?    .064  12.142 143.376  <  ?  ?  ?  ?
    7   1 -19  10.603  11.393  ? 112.429 129.797 137.584  <  ?  ?  ?  ?
    7   1 -18   8.899   5.118  ?  79.195  26.198  97.948  <  ?  ?  ?  ?
    7   1 -17  35.742  36.625  ? 1277.51 1341.41 104.087  o  ?  ?  ?  ?
    7   1 -16   6.566   7.000  ?  43.115  49.003  32.280  <  ?  ?  ?  ?
    7   1 -15  44.298  46.213  ? 1962.31 2135.62 100.381  o  ?  ?  ?  ?
    7   1 -14   4.782   4.541  ?  22.872  20.620  16.754  <  ?  ?  ?  ?
    7   1 -13  34.212  35.724  ? 1170.43 1276.20  49.358  o  ?  ?  ?  ?
    7   1 -12   7.826   8.031  ?  61.242  64.502  16.257  o  ?  ?  ?  ?
    7   1 -11  68.194  68.081  ? 4650.42 4635.08 140.465  o  ?  ?  ?  ?
    7   1 -10  15.427  12.531  ? 238.001 157.026  18.814  o  ?  ?  ?  ?
    7   1  -9   4.173   4.926  ?  17.410  24.268  13.436  <  ?  ?  ?  ?
    7   1  -8  20.280  25.743  ? 411.258 662.687  22.707  o  ?  ?  ?  ?
    7   1  -7 120.548 120.745  ? 14531.9 14579.4 394.214  o  ?  ?  ?  ?
    7   1  -6  27.265  27.738  ? 743.379 769.406  17.258  o  ?  ?  ?  ?
    7   1  -5  31.690  35.181  ? 1004.28 1237.70  23.886  o  ?  ?  ?  ?
    7   1  -4  21.063  24.645  ? 443.635 607.382  12.126  o  ?  ?  ?  ?
    7   1  -3 125.091 129.144  ? 15647.8 16678.3 439.090  o  ?  ?  ?  ?
    7   1  -2  33.667  38.930  ? 1133.45 1515.55  20.438  o  ?  ?  ?  ?
    7   1  -1  70.923  73.751  ? 5030.03 5439.27 102.845  o  ?  ?  ?  ?
    7   1   0  38.074  37.153  ? 1449.65 1380.35  30.906  o  ?  ?  ?  ?
    7   1   1  87.771  88.960  ? 7703.73 7913.83 137.584  o  ?  ?  ?  ?
    7   1   2  15.985  19.590  ? 255.528 383.770  11.290  o  ?  ?  ?  ?
    7   1   3 101.780  97.365  ? 10359.2 9480.00 194.015  o  ?  ?  ?  ?
    7   1   4  17.570  12.665  ? 308.699 160.396  14.813  o  ?  ?  ?  ?
    7   1   5  45.284  44.690  ? 2050.62 1997.16  48.504  o  ?  ?  ?  ?
    7   1   6  10.010  12.695  ? 100.197 161.154  11.290  o  ?  ?  ?  ?
    7   1   7 112.088 107.981  ? 12563.7 11660.0 612.175  o  ?  ?  ?  ?
    7   1   8    .386   2.153  ?    .149   4.636  11.704  <  ?  ?  ?  ?
    7   1   9  11.827   8.263  ? 139.888  68.274  17.769  o  ?  ?  ?  ?
    7   1  10   -.408    .274  ?    .166    .075  19.889  <  ?  ?  ?  ?
    7   1  11  73.451  69.927  ? 5395.00 4889.77 305.279  o  ?  ?  ?  ?
    7   1  12  21.552  18.713  ? 464.493 350.171  38.072  o  ?  ?  ?  ?
    7   1  13  26.900  26.834  ? 723.630 720.070  55.550  o  ?  ?  ?  ?
    7   1  14    .128   1.351  ?    .016   1.825  38.072  <  ?  ?  ?  ?
    7   1  15  49.142  49.323  ? 2414.93 2432.80 177.369  o  ?  ?  ?  ?
    7   1  16   2.464   8.808  ?   6.071  77.583  53.744  <  ?  ?  ?  ?
    7   1  17  34.403  35.676  ? 1183.60 1272.75 119.583  o  ?  ?  ?  ?
    7   1  18   4.798   3.901  ?  23.016  15.220  66.019  <  ?  ?  ?  ?
    7   1  19  17.620  20.336  ? 310.459 413.551  82.859  o  ?  ?  ?  ?
    7   1  20    .202   3.954  ?    .041  15.635 356.354  <  ?  ?  ?  ?
    7   2 -21  10.789   5.022  ? 116.409  25.218 100.381  <  ?  ?  ?  ?
    7   2 -20   3.793   3.067  ?  14.389   9.406  78.470  <  ?  ?  ?  ?
    7   2 -19  26.720  30.598  ? 713.946 936.230 150.785  o  ?  ?  ?  ?
    7   2 -18  11.843  11.128  ? 140.267 123.829  71.076  o  ?  ?  ?  ?
    7   2 -17  25.794  27.815  ? 665.346 773.700  71.076  o  ?  ?  ?  ?
    7   2 -16   3.373   1.277  ?  11.377   1.632  23.293  <  ?  ?  ?  ?
    7   2 -15  38.588  39.742  ? 1489.04 1579.41  87.367  o  ?  ?  ?  ?
    7   2 -14  18.689  21.153  ? 349.277 447.458  34.396  o  ?  ?  ?  ?
    7   2 -13  63.379  67.435  ? 4016.85 4547.49 137.584  o  ?  ?  ?  ?
    7   2 -12  28.099  30.080  ? 789.552 904.835  40.367  o  ?  ?  ?  ?
    7   2 -11  42.082  40.422  ? 1770.89 1633.92  68.019  o  ?  ?  ?  ?
    7   2 -10  42.661  45.461  ? 1819.97 2066.71  67.015  o  ?  ?  ?  ?
    7   2  -9  83.796  81.063  ? 7021.82 6571.14 246.508  o  ?  ?  ?  ?
    7   2  -8  26.253  27.241  ? 689.200 742.093  31.589  o  ?  ?  ?  ?
    7   2  -7   4.043   7.063  ?  16.345  49.885   9.331  <  ?  ?  ?  ?
    7   2  -6  32.728  30.261  ? 1071.11 915.705  35.844  o  ?  ?  ?  ?
    7   2  -5 117.214 116.707  ? 13739.1 13620.6 318.223  o  ?  ?  ?  ?
    7   2  -4  34.223  35.777  ? 1171.23 1279.98  25.711  o  ?  ?  ?  ?
    7   2  -3  61.569  60.369  ? 3790.77 3644.46  87.367  o  ?  ?  ?  ?
    7   2  -2   3.698    .016  ?  13.674    .000   7.897  <  ?  ?  ?  ?
    7   2  -1  99.589 100.790  ? 9917.95 10158.5 351.756  o  ?  ?  ?  ?
    7   2   0  56.444  60.365  ? 3185.91 3643.95  67.015  o  ?  ?  ?  ?
    7   2   1 100.891 100.594  ? 10179.0 10119.2 235.132  o  ?  ?  ?  ?
    7   2   2   6.686   4.615  ?  44.699  21.300   9.707  o  ?  ?  ?  ?
    7   2   3  64.094  65.693  ? 4108.01 4315.52  71.076  o  ?  ?  ?  ?
    7   2   4  21.301  19.908  ? 453.744 396.347  18.288  o  ?  ?  ?  ?
    7   2   5 116.079 110.914  ? 13474.3 12301.8 439.090  o  ?  ?  ?  ?
    7   2   6   6.689   6.061  ?  44.741  36.736  13.436  <  ?  ?  ?  ?
    7   2   7  10.642  14.731  ? 113.255 217.010  13.436  o  ?  ?  ?  ?
    7   2   8   8.531   9.221  ?  72.780  85.028  16.754  o  ?  ?  ?  ?
    7   2   9  79.331  75.484  ? 6293.48 5697.90 296.800  o  ?  ?  ?  ?
    7   2  10  34.578  34.888  ? 1195.62 1217.19  49.358  o  ?  ?  ?  ?
    7   2  11  11.904  13.473  ? 141.703 181.529  32.280  o  ?  ?  ?  ?
    7   2  12   4.995   9.776  ?  24.951  95.568  32.978  <  ?  ?  ?  ?
    7   2  13  54.113  54.594  ? 2928.24 2980.51 324.795  o  ?  ?  ?  ?
    7   2  14  18.368  17.240  ? 337.399 297.213  53.744  o  ?  ?  ?  ?
    7   2  15  27.576  28.923  ? 760.450 836.548  74.200  o  ?  ?  ?  ?
    7   2  16   7.784   6.722  ?  60.597  45.179  44.342  <  ?  ?  ?  ?
    7   2  17  29.394  30.124  ? 864.012 907.480  99.161  o  ?  ?  ?  ?
    7   2  18   4.549   7.239  ?  20.689  52.406  64.048  <  ?  ?  ?  ?
    7   2  19  21.656  21.558  ? 468.987 464.758 102.845  o  ?  ?  ?  ?
    7   3 -20  15.859  17.630  ? 251.511 310.820 102.845  o  ?  ?  ?  ?
    7   3 -19  14.819  16.877  ? 219.591 284.847  88.513  o  ?  ?  ?  ?
    7   3 -18   6.708   7.034  ?  44.993  49.475  67.015  <  ?  ?  ?  ?
    7   3 -17  31.141  33.223  ? 969.737 1103.80 101.609  o  ?  ?  ?  ?
    7   3 -16  24.851  25.766  ? 617.579 663.905  73.151  o  ?  ?  ?  ?
    7   3 -15  41.874  41.995  ? 1753.42 1763.57  97.948  o  ?  ?  ?  ?
    7   3 -14  11.101  10.574  ? 123.236 111.817  28.249  o  ?  ?  ?  ?
    7   3 -13  39.195  41.007  ? 1536.23 1681.57  67.015  o  ?  ?  ?  ?
    7   3 -12  26.956  27.610  ? 726.618 762.317  48.504  o  ?  ?  ?  ?
    7   3 -11  74.165  74.215  ? 5500.39 5507.83 396.644  o  ?  ?  ?  ?
    7   3 -10  16.179  20.055  ? 261.754 402.209  25.711  o  ?  ?  ?  ?
    7   3  -9  20.972  18.691  ? 439.823 349.368  30.231  o  ?  ?  ?  ?
    7   3  -8  51.950  49.268  ? 2698.83 2427.35 105.338  o  ?  ?  ?  ?
    7   3  -7  86.749  88.080  ? 7525.37 7758.00 270.066  o  ?  ?  ?  ?
    7   3  -6  35.946  40.017  ? 1292.11 1601.36  38.830  o  ?  ?  ?  ?
    7   3  -5  18.914  22.968  ? 357.745 527.522  18.814  o  ?  ?  ?  ?
    7   3  -4  18.611  19.666  ? 346.367 386.756  20.994  o  ?  ?  ?  ?
    7   3  -3  89.933  94.055  ? 8087.92 8846.33 152.289  o  ?  ?  ?  ?
    7   3  -2  67.959  69.220  ? 4618.37 4791.41 115.609  o  ?  ?  ?  ?
    7   3  -1  77.167  71.677  ? 5954.77 5137.59 179.000  o  ?  ?  ?  ?
    7   3   0   -.121   1.505  ?    .015   2.266  10.092  <  ?  ?  ?  ?
    7   3   1  71.053  71.583  ? 5048.57 5124.09 112.996  o  ?  ?  ?  ?
    7   3   2  65.833  68.396  ? 4333.96 4678.08 122.271  o  ?  ?  ?  ?
    7   3   3 115.311 111.827  ? 13296.7 12505.3 541.770  o  ?  ?  ?  ?
    7   3   4   8.402   7.696  ?  70.586  59.231  10.883  o  ?  ?  ?  ?
    7   3   5  30.252  31.898  ? 915.163 1017.51  25.711  o  ?  ?  ?  ?
    7   3   6  41.495  41.878  ? 1721.84 1753.79  43.532  o  ?  ?  ?  ?
    7   3   7  96.655  97.306  ? 9342.20 9468.43 340.392  o  ?  ?  ?  ?
    7   3   8  37.299  34.481  ? 1391.21 1188.93  51.090  o  ?  ?  ?  ?
    7   3   9   8.531   5.892  ?  72.773  34.711  23.293  o  ?  ?  ?  ?
    7   3  10  27.960  31.015  ? 781.755 961.922  43.532  o  ?  ?  ?  ?
    7   3  11  54.203  55.680  ? 2938.01 3100.21 155.319  o  ?  ?  ?  ?
    7   3  12  30.839  33.169  ? 951.050 1100.21  73.151  o  ?  ?  ?  ?
    7   3  13  18.318  17.554  ? 335.531 308.157  56.464  o  ?  ?  ?  ?
    7   3  14   3.299   6.958  ?  10.885  48.420  41.148  <  ?  ?  ?  ?
    7   3  15  30.906  31.920  ? 955.206 1018.90  87.367  o  ?  ?  ?  ?
    7   3  16  15.713  18.807  ? 246.889 353.688  52.852  o  ?  ?  ?  ?
    7   3  17  23.264  20.508  ? 541.209 420.586  76.320  o  ?  ?  ?  ?
    7   3  18    .082   4.521  ?    .007  20.439  55.550  <  ?  ?  ?  ?
    7   3  19   5.926   8.099  ?  35.120  65.598 130.511  <  ?  ?  ?  ?
    7   4 -20   7.569   9.573  ?  57.286  91.645  89.666  <  ?  ?  ?  ?
    7   4 -19  22.929  24.608  ? 525.742 605.566 143.376  o  ?  ?  ?  ?
    7   4 -18  20.404  23.410  ? 416.343 548.049  72.110  o  ?  ?  ?  ?
    7   4 -17  16.598  19.541  ? 275.507 381.870  62.108  o  ?  ?  ?  ?
    7   4 -16    .025   1.537  ?    .001   2.361  35.844  <  ?  ?  ?  ?
    7   4 -15  22.917  25.512  ? 525.170 650.842  71.076  o  ?  ?  ?  ?
    7   4 -14  38.170  38.000  ? 1456.98 1444.04 124.988  o  ?  ?  ?  ?
    7   4 -13  37.530  38.671  ? 1408.51 1495.44 116.926  o  ?  ?  ?  ?
    7   4 -12  11.521  12.274  ? 132.722 150.645  22.707  o  ?  ?  ?  ?
    7   4 -11  21.481  22.719  ? 461.454 516.152  32.280  o  ?  ?  ?  ?
    7   4 -10  41.126  42.325  ? 1691.34 1791.43  71.076  o  ?  ?  ?  ?
    7   4  -9  58.623  57.877  ? 3436.67 3349.75 195.720  o  ?  ?  ?  ?
    7   4  -8  21.753  26.047  ? 473.201 678.422  24.487  o  ?  ?  ?  ?
    7   4  -7  12.470  12.861  ? 155.501 165.397  15.769  o  ?  ?  ?  ?
    7   4  -6  40.281  40.980  ? 1622.55 1679.39  53.744  o  ?  ?  ?  ?
    7   4  -5  84.630  82.236  ? 7162.32 6762.80 227.698  o  ?  ?  ?  ?
    7   4  -4  51.414  56.820  ? 2643.43 3228.55  76.320  o  ?  ?  ?  ?
    7   4  -3  28.662  29.886  ? 821.536 893.191  32.978  o  ?  ?  ?  ?
    7   4  -2    .709   1.965  ?    .503   3.863  12.555  <  ?  ?  ?  ?
    7   4  -1  73.517  72.800  ? 5404.81 5299.83 131.911  o  ?  ?  ?  ?
    7   4   0  85.715  82.149  ? 7347.00 6748.43 207.869  o  ?  ?  ?  ?
    7   4   1  57.678  56.400  ? 3326.76 3181.00  88.513  o  ?  ?  ?  ?
    7   4   2  12.767   8.198  ? 162.993  67.199  13.888  o  ?  ?  ?  ?
    7   4   3  39.753  43.063  ? 1580.27 1854.42  41.935  o  ?  ?  ?  ?
    7   4   4  73.044  72.903  ? 5335.46 5314.81 134.733  o  ?  ?  ?  ?
    7   4   5  73.769  73.650  ? 5441.92 5424.25 144.843  o  ?  ?  ?  ?
    7   4   6  28.066  29.133  ? 787.701 848.738  41.935  o  ?  ?  ?  ?
    7   4   7  20.261  18.159  ? 410.494 329.743  29.563  o  ?  ?  ?  ?
    7   4   8  49.695  51.031  ? 2469.59 2604.20  99.161  o  ?  ?  ?  ?
    7   4   9  62.845  64.935  ? 3949.50 4216.54 156.846  o  ?  ?  ?  ?
    7   4  10  48.717  52.078  ? 2373.38 2712.16  99.161  o  ?  ?  ?  ?
    7   4  11   5.984   3.560  ?  35.804  12.675  27.603  <  ?  ?  ?  ?
    7   4  12  21.298  23.361  ? 453.605 545.749  41.148  o  ?  ?  ?  ?
    7   4  13  30.910  31.965  ? 955.420 1021.75  85.098  o  ?  ?  ?  ?
    7   4  14  31.413  30.554  ? 986.777 933.539 109.133  o  ?  ?  ?  ?
    7   4  15  21.762  21.266  ? 473.565 452.234  75.256  o  ?  ?  ?  ?
    7   4  16    .083   2.233  ?    .007   4.985  50.221  <  ?  ?  ?  ?
    7   4  17  15.519  17.716  ? 240.837 313.844  75.256  o  ?  ?  ?  ?
    7   4  18  23.107  23.523  ? 533.953 553.326  89.666  o  ?  ?  ?  ?
    7   4  19  14.513  19.514  ? 210.633 380.799 149.288  o  ?  ?  ?  ?
    7   5 -19   6.178   6.739  ?  38.166  45.417  89.666  <  ?  ?  ?  ?
    7   5 -18    .243   6.609  ?    .059  43.682  51.090  <  ?  ?  ?  ?
    7   5 -17  13.853  15.736  ? 191.915 247.625  59.252  o  ?  ?  ?  ?
    7   5 -16  32.280  34.060  ? 1042.00 1160.10 111.701  o  ?  ?  ?  ?
    7   5 -15  14.407  15.276  ? 207.576 233.364  51.967  o  ?  ?  ?  ?
    7   5 -14   5.005   3.914  ?  25.051  15.319  35.844  <  ?  ?  ?  ?
    7   5 -13  15.806  18.068  ? 249.839 326.456  50.221  o  ?  ?  ?  ?
    7   5 -12  42.682  44.516  ? 1821.77 1981.71 150.785  o  ?  ?  ?  ?
    7   5 -11  31.855  31.866  ? 1014.73 1015.44  54.643  o  ?  ?  ?  ?
    7   5 -10  27.364  27.547  ? 748.765 758.827  41.935  o  ?  ?  ?  ?
    7   5  -9   5.283   7.418  ?  27.910  55.020  18.814  <  ?  ?  ?  ?
    7   5  -8  43.942  46.540  ? 1930.90 2165.97  56.464  o  ?  ?  ?  ?
    7   5  -7  57.342  55.391  ? 3288.10 3068.11  91.995  o  ?  ?  ?  ?
    7   5  -6  47.560  49.250  ? 2261.99 2425.60  69.031  o  ?  ?  ?  ?
    7   5  -5   7.596   3.991  ?  57.703  15.931  13.436  o  ?  ?  ?  ?
    7   5  -4  16.799  14.792  ? 282.204 218.809  20.438  o  ?  ?  ?  ?
    7   5  -3  57.138  53.184  ? 3264.76 2828.49 106.595  o  ?  ?  ?  ?
    7   5  -2  65.913  67.131  ? 4344.49 4506.51 158.380  o  ?  ?  ?  ?
    7   5  -1  18.662  19.386  ? 348.273 375.817  31.589  o  ?  ?  ?  ?
    7   5   0  21.354  22.101  ? 456.007 488.447  19.889  o  ?  ?  ?  ?
    7   5   1  44.377  46.563  ? 1969.30 2168.09  53.744  o  ?  ?  ?  ?
    7   5   2  83.530  81.158  ? 6977.18 6586.58 229.545  o  ?  ?  ?  ?
    7   5   3  44.110  45.500  ? 1945.70 2070.25  51.967  o  ?  ?  ?  ?
    7   5   4  25.313  24.208  ? 640.745 586.042  24.487  o  ?  ?  ?  ?
    7   5   5  11.315  13.155  ? 128.024 173.050  20.438  o  ?  ?  ?  ?
    7   5   6  60.171  60.459  ? 3620.55 3655.25 202.618  o  ?  ?  ?  ?
    7   5   7  40.912  40.068  ? 1673.76 1605.41 106.595  o  ?  ?  ?  ?
    7   5   8  41.807  44.385  ? 1747.81 1970.07 123.625  o  ?  ?  ?  ?
    7   5   9   5.642   4.523  ?  31.837  20.458  32.280  <  ?  ?  ?  ?
    7   5  10  35.892  35.528  ? 1288.21 1262.23  97.948  o  ?  ?  ?  ?
    7   5  11  38.816  41.131  ? 1506.67 1691.77 115.609  o  ?  ?  ?  ?
    7   5  12  39.972  39.986  ? 1597.78 1598.90  89.666  o  ?  ?  ?  ?
    7   5  13  13.446  13.724  ? 180.796 188.337  32.978  o  ?  ?  ?  ?
    7   5  14   6.783   8.414  ?  46.013  70.795  41.935  <  ?  ?  ?  ?
    7   5  15  18.033  19.897  ? 325.173 395.877  64.048  o  ?  ?  ?  ?
    7   5  16  24.521  24.446  ? 601.269 597.623  82.859  o  ?  ?  ?  ?
    7   5  17  13.808  16.748  ? 190.674 280.496  66.019  o  ?  ?  ?  ?
    7   5  18    .102   3.026  ?    .010   9.158 133.318  <  ?  ?  ?  ?
    7   6 -18  21.993  24.403  ? 483.709 595.488 224.025  o  ?  ?  ?  ?
    7   6 -17   5.953   6.867  ?  35.434  47.153  51.090  <  ?  ?  ?  ?
    7   6 -16   -.046    .162  ?    .002    .026  45.984  <  ?  ?  ?  ?
    7   6 -15  11.259  10.698  ? 126.766 114.456  51.967  o  ?  ?  ?  ?
    7   6 -14  33.925  35.932  ? 1150.89 1291.09 120.923  o  ?  ?  ?  ?
    7   6 -13  15.393  16.184  ? 236.955 261.926  51.967  o  ?  ?  ?  ?
    7   6 -12  16.504  16.503  ? 272.396 272.365  52.852  o  ?  ?  ?  ?
    7   6 -11   6.161   8.281  ?  37.964  68.573  38.830  <  ?  ?  ?  ?
    7   6 -10  49.153  49.796  ? 2416.02 2479.60 149.288  o  ?  ?  ?  ?
    7   6  -9  31.704  32.897  ? 1005.17 1082.24  78.470  o  ?  ?  ?  ?
    7   6  -8  39.578  37.644  ? 1566.38 1417.07  76.320  o  ?  ?  ?  ?
    7   6  -7   7.961   7.660  ?  63.372  58.682  20.438  o  ?  ?  ?  ?
    7   6  -6  38.073  38.046  ? 1449.54 1447.49  51.967  o  ?  ?  ?  ?
    7   6  -5  40.761  41.300  ? 1661.48 1705.72  59.252  o  ?  ?  ?  ?
    7   6  -4  76.508  72.456  ? 5853.52 5249.81 227.698  o  ?  ?  ?  ?
    7   6  -3   7.796   8.482  ?  60.780  71.942  17.258  o  ?  ?  ?  ?
    7   6  -2  10.716  10.523  ? 114.827 110.742  17.769  o  ?  ?  ?  ?
    7   6  -1  30.597  31.106  ? 936.159 967.577  39.595  o  ?  ?  ?  ?
    7   6   0  81.056  80.900  ? 6570.14 6544.74 206.111  o  ?  ?  ?  ?
    7   6   1  38.233  39.722  ? 1461.74 1577.88  42.730  o  ?  ?  ?  ?
    7   6   2   6.210   6.334  ?  38.567  40.113  12.555  <  ?  ?  ?  ?
    7   6   3  23.287  24.175  ? 542.268 584.407  21.557  o  ?  ?  ?  ?
    7   6   4  57.817  57.337  ? 3342.85 3287.51 164.590  o  ?  ?  ?  ?
    7   6   5  23.298  23.825  ? 542.799 567.645  48.504  o  ?  ?  ?  ?
    7   6   6  28.891  29.064  ? 834.716 844.731  65.030  o  ?  ?  ?  ?
    7   6   8  41.151  41.350  ? 1693.39 1709.79 107.861  o  ?  ?  ?  ?
    7   6   9  30.280  31.250  ? 916.860 976.549  81.750  o  ?  ?  ?  ?
    7   6  10  41.803  41.956  ? 1747.47 1760.27 126.357  o  ?  ?  ?  ?
    7   6  11  10.435   7.227  ? 108.887  52.229  44.342  o  ?  ?  ?  ?
    7   6  12  17.116  18.357  ? 292.968 336.975  49.358  o  ?  ?  ?  ?
    7   6  13  16.017  17.203  ? 256.538 295.950  52.852  o  ?  ?  ?  ?
    7   6  14  32.344  32.170  ? 1046.14 1034.89 153.800  o  ?  ?  ?  ?
    7   6  15  13.414  13.201  ? 179.932 174.275  88.513  o  ?  ?  ?  ?
    7   6  16    .096   2.347  ?    .009   5.509  83.975  <  ?  ?  ?  ?
    7   7 -16  24.032  26.414  ? 577.542 697.711  93.171  o  ?  ?  ?  ?
    7   7 -15   7.761   7.664  ?  60.235  58.735  53.744  <  ?  ?  ?  ?
    7   7 -14    .223   3.052  ?    .050   9.315  46.817  <  ?  ?  ?  ?
    7   7 -13  10.061   8.300  ? 101.230  68.883  49.358  o  ?  ?  ?  ?
    7   7 -12  34.804  37.797  ? 1211.31 1428.59 136.154  o  ?  ?  ?  ?
    7   7 -11  17.297  17.621  ? 299.203 310.488  63.074  o  ?  ?  ?  ?
    7   7 -10  29.310  32.908  ? 859.089 1082.93 105.338  o  ?  ?  ?  ?
    7   7  -9   7.509   4.806  ?  56.387  23.096  35.844  <  ?  ?  ?  ?
    7   7  -8  45.116  46.601  ? 2035.43 2171.69 102.845  o  ?  ?  ?  ?
    7   7  -7  22.420  22.983  ? 502.648 528.211  57.386  o  ?  ?  ?  ?
    7   7  -6  52.881  53.268  ? 2796.44 2837.45 133.318  o  ?  ?  ?  ?
    7   7  -5   1.356   5.159  ?   1.838  26.611  26.334  <  ?  ?  ?  ?
    7   7  -4  39.128  40.417  ? 1530.96 1633.53  78.470  o  ?  ?  ?  ?
    7   7  -3  21.173  23.024  ? 448.291 530.098  37.322  o  ?  ?  ?  ?
    7   7  -2  76.046  72.493  ? 5782.95 5255.16 250.360  o  ?  ?  ?  ?
    7   7  -1  17.398  16.786  ? 302.696 281.766  32.978  o  ?  ?  ?  ?
    7   7   0  16.951  16.696  ? 287.326 278.762  32.280  o  ?  ?  ?  ?
    7   7   1  19.234  20.617  ? 369.933 425.069  25.095  o  ?  ?  ?  ?
    7   7   2  62.236  63.539  ? 3873.38 4037.23 172.521  o  ?  ?  ?  ?
    7   7   3  17.381  18.013  ? 302.091 324.480  37.322  o  ?  ?  ?  ?
    7   7   4  16.391  17.542  ? 268.655 307.732  41.148  o  ?  ?  ?  ?
    7   7   5   5.728   1.358  ?  32.813   1.845  30.906  <  ?  ?  ?  ?
    7   7   6  51.981  52.424  ? 2702.02 2748.23 218.573  o  ?  ?  ?  ?
    7   7   7  17.263  18.281  ? 298.020 334.203  45.160  o  ?  ?  ?  ?
    7   7   8  33.320  32.888  ? 1110.24 1081.60  90.827  o  ?  ?  ?  ?
    7   7   9   3.865   6.133  ?  14.938  37.612  45.984  <  ?  ?  ?  ?
    7   7  10  28.030  29.019  ? 785.694 842.089  85.098  o  ?  ?  ?  ?
    7   7  11  16.361  18.308  ? 267.688 335.166  56.464  o  ?  ?  ?  ?
    7   7  12  37.006  36.975  ? 1369.43 1367.18 163.026  o  ?  ?  ?  ?
    7   7  13   9.446   8.851  ?  89.235  78.332  59.252  <  ?  ?  ?  ?
    7   7  14   4.126   9.517  ?  17.024  90.566  51.967  <  ?  ?  ?  ?
    7   7  15   8.851   8.060  ?  78.337  64.962  78.470  <  ?  ?  ?  ?
    7   8 -14  27.987  29.456  ? 783.290 867.669 115.609  o  ?  ?  ?  ?
    7   8 -13    .137   3.566  ?    .019  12.718  52.852  <  ?  ?  ?  ?
    7   8 -12  14.477  14.539  ? 209.581 211.378  67.015  o  ?  ?  ?  ?
    7   8 -11   4.952   2.868  ?  24.522   8.225  56.464  <  ?  ?  ?  ?
    7   8 -10  36.984  38.159  ? 1367.83 1456.08 158.380  o  ?  ?  ?  ?
    7   8  -9  11.739   8.902  ? 137.815  79.237  58.316  o  ?  ?  ?  ?
    7   8  -8  39.730  40.777  ? 1578.46 1662.78  99.161  o  ?  ?  ?  ?
    7   8  -7    .010   1.750  ?    .000   3.063  25.711  <  ?  ?  ?  ?
    7   8  -6  34.749  36.453  ? 1207.49 1328.85  80.649  o  ?  ?  ?  ?
    7   8  -5   2.042   3.839  ?   4.171  14.735  32.280  <  ?  ?  ?  ?
    7   8  -4  57.497  55.909  ? 3305.90 3125.86 175.746  o  ?  ?  ?  ?
    7   8  -3    .096   2.522  ?    .009   6.363  33.683  <  ?  ?  ?  ?
    7   8  -2  20.009  20.789  ? 400.349 432.195  41.935  o  ?  ?  ?  ?
    7   8  -1    .299   3.305  ?    .090  10.923  27.603  <  ?  ?  ?  ?
    7   8   0  62.143  61.427  ? 3861.77 3773.27 167.740  o  ?  ?  ?  ?
    7   8   1  10.491  11.042  ? 110.054 121.916  31.589  o  ?  ?  ?  ?
    7   8   2   3.107   4.118  ?   9.657  16.955  25.711  <  ?  ?  ?  ?
    7   8   3   4.345   3.661  ?  18.877  13.400  30.231  <  ?  ?  ?  ?
    7   8   4  53.059  55.076  ? 2815.23 3033.32 187.267  o  ?  ?  ?  ?
    7   8   5   5.559   7.091  ?  30.899  50.276  38.072  <  ?  ?  ?  ?
    7   8   6  23.834  24.852  ? 568.065 617.629  62.108  o  ?  ?  ?  ?
    7   8   7   3.881   2.026  ?  15.059   4.105  39.595  <  ?  ?  ?  ?
    7   8   8  37.828  36.656  ? 1430.98 1343.63 130.511  o  ?  ?  ?  ?
    7   8   9   8.391   7.038  ?  70.404  49.530  45.984  <  ?  ?  ?  ?
    7   8  10  32.527  31.044  ? 1058.00 963.716 126.357  o  ?  ?  ?  ?
    7   8  11   6.451   1.731  ?  41.613   2.997  52.852  <  ?  ?  ?  ?
    7   8  12  14.582  14.255  ? 212.646 203.204  73.151  o  ?  ?  ?  ?
    7   8  13   5.259   3.471  ?  27.655  12.047  59.252  <  ?  ?  ?  ?
    7   8  14  26.287  28.977  ? 690.992 839.679 375.045  o  ?  ?  ?  ?
    7   8  15   1.070    .810  ?   1.146    .657 311.717  <  ?  ?  ?  ?
    7   9 -12  32.365  31.928  ? 1047.47 1019.41 149.288  o  ?  ?  ?  ?
    7   9 -11    .068   1.460  ?    .005   2.131  61.148  <  ?  ?  ?  ?
    7   9 -10  17.859  20.117  ? 318.949 404.677  86.229  o  ?  ?  ?  ?
    7   9  -9   3.950   4.040  ?  15.603  16.324  66.019  <  ?  ?  ?  ?
    7   9  -8  28.884  29.766  ? 834.301 886.007 136.154  o  ?  ?  ?  ?
    7   9  -7    .041   3.071  ?    .002   9.429  30.906  <  ?  ?  ?  ?
    7   9  -6  39.946  38.451  ? 1595.70 1478.49 112.996  o  ?  ?  ?  ?
    7   9  -5   5.998   2.402  ?  35.977   5.768  41.148  <  ?  ?  ?  ?
    7   9  -4  21.185  24.087  ? 448.822 580.177  58.316  o  ?  ?  ?  ?
    7   9  -3   7.337   5.602  ?  53.834  31.379  39.595  <  ?  ?  ?  ?
    7   9  -2  47.296  45.554  ? 2236.92 2075.19 147.799  o  ?  ?  ?  ?
    7   9  -1   -.113   2.889  ?    .013   8.345  39.595  <  ?  ?  ?  ?
    7   9   0    .129    .858  ?    .017    .737  32.280  <  ?  ?  ?  ?
    7   9   1   4.836   1.108  ?  23.391   1.228  35.116  <  ?  ?  ?  ?
    7   9   2  46.205  45.336  ? 2134.89 2055.33 143.376  o  ?  ?  ?  ?
    7   9   3   4.110   3.711  ?  16.892  13.769  38.072  <  ?  ?  ?  ?
    7   9   4  16.389  17.205  ? 268.613 296.013  53.744  o  ?  ?  ?  ?
    7   9   5   3.560   2.760  ?  12.676   7.618  41.148  <  ?  ?  ?  ?
    7   9   6  38.568  38.100  ? 1487.48 1451.61 124.988  o  ?  ?  ?  ?
    7   9   7    .096   1.831  ?    .009   3.354  45.984  <  ?  ?  ?  ?
    7   9   8  26.918  25.904  ? 724.560 671.033  94.354  o  ?  ?  ?  ?
    7   9   9   -.038   2.103  ?    .001   4.423  52.852  <  ?  ?  ?  ?
    7   9  10  22.052  21.680  ? 486.278 470.004  90.827  o  ?  ?  ?  ?
    7   9  11   2.413   2.344  ?   5.822   5.496  63.074  <  ?  ?  ?  ?
    7   9  12  26.561  25.402  ? 705.509 645.258 354.052  o  ?  ?  ?  ?
    7  10  -9   8.692   7.350  ?  75.543  54.026  67.015  <  ?  ?  ?  ?
    7  10  -8  18.414  20.441  ? 339.061 417.823 107.861  o  ?  ?  ?  ?
    7  10  -7   5.534   4.702  ?  30.625  22.109  49.358  <  ?  ?  ?  ?
    7  10  -6  19.547  19.397  ? 382.073 376.256  61.148  o  ?  ?  ?  ?
    7  10  -5    .919   6.676  ?    .844  44.569  44.342  <  ?  ?  ?  ?
    7  10  -4  30.004  29.850  ? 900.248 891.003  89.666  o  ?  ?  ?  ?
    7  10  -3   5.085   6.105  ?  25.861  37.265  45.984  <  ?  ?  ?  ?
    7  10  -2   6.017   6.929  ?  36.203  48.013  47.656  <  ?  ?  ?  ?
    7  10  -1   8.997   8.667  ?  80.938  75.120  50.221  <  ?  ?  ?  ?
    7  10   0  41.160  40.810  ? 1694.13 1665.43 136.154  o  ?  ?  ?  ?
    7  10   1   7.179   5.917  ?  51.540  35.007  66.019  <  ?  ?  ?  ?
    7  10   2   1.125   7.153  ?   1.265  51.162  46.817  <  ?  ?  ?  ?
    7  10   3   6.405    .760  ?  41.028    .577  47.656  <  ?  ?  ?  ?
    7  10   4  37.246  37.072  ? 1387.24 1374.30 124.988  o  ?  ?  ?  ?
    7  10   5   6.687   8.784  ?  44.714  77.152  51.090  <  ?  ?  ?  ?
    7  10   6  14.678  15.445  ? 215.431 238.546  64.048  o  ?  ?  ?  ?
    7  10   7    .066    .057  ?    .004    .003  51.967  <  ?  ?  ?  ?
    7  10   8  22.590  22.294  ? 510.318 497.015  87.367  o  ?  ?  ?  ?
    7  10   9  11.191   4.870  ? 125.248  23.719 159.921  <  ?  ?  ?  ?
    7  11  -5    .985   3.554  ?    .971  12.634 169.326  <  ?  ?  ?  ?
    7  11  -4  10.052  10.361  ? 101.035 107.348  96.742  <  ?  ?  ?  ?
    7  11  -3  11.408  13.327  ? 130.139 177.619  99.161  o  ?  ?  ?  ?
    7  11  -2  29.123  28.215  ? 848.152 796.077 102.845  o  ?  ?  ?  ?
    7  11  -1    .330   2.338  ?    .109   5.466  69.031  <  ?  ?  ?  ?
    7  11   0   -.103    .368  ?    .011    .135  76.320  <  ?  ?  ?  ?
    7  11   1   4.872   4.889  ?  23.740  23.899  78.470  <  ?  ?  ?  ?
    7  11   2  30.123  29.646  ? 907.391 878.890 227.698  o  ?  ?  ?  ?
    7  11   3  15.826  14.704  ? 250.468 216.202 389.377  o  ?  ?  ?  ?
    7  11   4   8.119  10.007  ?  65.925 100.131 150.785  <  ?  ?  ?  ?
    7  11   5    .173    .617  ?    .030    .381 335.898  <  ?  ?  ?  ?
    7  11   6  18.714  21.293  ? 350.212 453.379 367.980  o  ?  ?  ?  ?
    8   0 -16    .107   5.025  ?    .011  25.251  49.358  <  ?  ?  ?  ?
    8   0 -14  58.423  63.894  ? 3413.26 4082.45 344.915  o  ?  ?  ?  ?
    8   0 -12  21.110  24.557  ? 445.623 603.045  72.110  o  ?  ?  ?  ?
    8   0 -10  67.645  65.341  ? 4575.80 4269.49 344.915  o  ?  ?  ?  ?
    8   0  -8  45.999  48.485  ? 2115.93 2350.77 167.740  o  ?  ?  ?  ?
    8   0  -6  65.227  61.288  ? 4254.58 3756.19 375.045  o  ?  ?  ?  ?
    8   0  -4 101.171  97.476  ? 10235.6 9501.56 1839.24  o  ?  ?  ?  ?
    8   0  -2  20.187  19.126  ? 407.534 365.798  34.396  o  ?  ?  ?  ?
    8   0   0 118.985 109.344  ? 14157.4 11956.2 963.147  o  ?  ?  ?  ?
    8   0   2  43.839  42.729  ? 1921.83 1825.76 143.376  o  ?  ?  ?  ?
    8   0   4 128.904 115.026  ? 16616.3 13230.9 2412.56  o  ?  ?  ?  ?
    8   0   6  66.329  59.793  ? 4399.59 3575.19 305.279  o  ?  ?  ?  ?
    8   0   8  77.061  71.345  ? 5938.43 5090.17 451.985  o  ?  ?  ?  ?
    8   0  10  58.349  53.212  ? 3404.58 2831.53 327.001  o  ?  ?  ?  ?
    8   0  12  41.228  41.521  ? 1699.78 1723.96 167.740  o  ?  ?  ?  ?
    8   0  14  49.684  48.275  ? 2468.54 2330.49 322.597  o  ?  ?  ?  ?
    8   0  16   9.889    .371  ?  97.783    .138 105.338  <  ?  ?  ?  ?
    8   0  18  34.446  35.792  ? 1186.52 1281.06 260.120  o  ?  ?  ?  ?
    8   1 -17  10.311   5.335  ? 106.307  28.457 119.583  <  ?  ?  ?  ?
    8   1 -16  49.013  47.522  ? 2402.32 2258.35 505.430  o  ?  ?  ?  ?
    8   1 -15   9.765  11.543  ?  95.359 133.232  38.072  o  ?  ?  ?  ?
    8   1 -14  10.795  10.682  ? 116.534 114.111  40.367  o  ?  ?  ?  ?
    8   1 -13  11.015  13.639  ? 121.340 186.019  39.595  o  ?  ?  ?  ?
    8   1 -12  69.788  69.204  ? 4870.35 4789.21 327.001  o  ?  ?  ?  ?
    8   1 -11   8.216  11.104  ?  67.511 123.293  20.994  o  ?  ?  ?  ?
    8   1 -10  21.389  20.001  ? 457.468 400.022  33.683  o  ?  ?  ?  ?
    8   1  -9  29.781  26.306  ? 886.929 692.016  47.656  o  ?  ?  ?  ?
    8   1  -8  49.858  48.602  ? 2485.82 2362.19 115.609  o  ?  ?  ?  ?
    8   1  -7   1.269   2.533  ?   1.610   6.414  18.814  <  ?  ?  ?  ?
    8   1  -6  86.261  82.267  ? 7440.92 6767.86 298.908  o  ?  ?  ?  ?
    8   1  -5    .168   5.285  ?    .028  27.933   8.961  <  ?  ?  ?  ?
    8   1  -4  40.265  43.770  ? 1621.30 1915.84  35.116  o  ?  ?  ?  ?
    8   1  -3  14.210  14.087  ? 201.931 198.430  11.704  o  ?  ?  ?  ?
    8   1  -2 111.806 108.497  ? 12500.7 11771.6 772.659  o  ?  ?  ?  ?
    8   1  -1  25.797  25.988  ? 665.505 675.391  16.754  o  ?  ?  ?  ?
    8   1   0    .296   8.803  ?    .087  77.496   7.897  <  ?  ?  ?  ?
    8   1   1  20.099  19.729  ? 403.970 389.251  15.287  o  ?  ?  ?  ?
    8   1   2 109.151 102.856  ? 11914.0 10579.3 386.970  o  ?  ?  ?  ?
    8   1   3  16.014  17.421  ? 256.464 303.478  15.769  o  ?  ?  ?  ?
    8   1   4  38.376  36.515  ? 1472.74 1333.35  63.074  o  ?  ?  ?  ?
    8   1   5   7.742   7.840  ?  59.939  61.464  14.347  o  ?  ?  ?  ?
    8   1   6  85.973  81.086  ? 7391.36 6575.01 268.062  o  ?  ?  ?  ?
    8   1   7  19.235  17.984  ? 369.974 323.441  21.557  o  ?  ?  ?  ?
    8   1   8  61.323  58.002  ? 3760.51 3364.28 248.430  o  ?  ?  ?  ?
    8   1   9   5.952   1.800  ?  35.425   3.240  21.557  <  ?  ?  ?  ?
    8   1  10  55.284  52.502  ? 3056.28 2756.45 163.026  o  ?  ?  ?  ?
    8   1  11   4.855   9.844  ?  23.573  96.899  28.902  <  ?  ?  ?  ?
    8   1  12  50.426  49.724  ? 2542.81 2472.51 180.639  o  ?  ?  ?  ?
    8   1  13    .204    .078  ?    .042    .006  44.342  <  ?  ?  ?  ?
    8   1  14  12.466  13.647  ? 155.394 186.254  51.090  o  ?  ?  ?  ?
    8   1  15   6.148   6.120  ?  37.797  37.459  46.817  <  ?  ?  ?  ?
    8   1  16  40.426  41.382  ? 1634.25 1712.44 163.026  o  ?  ?  ?  ?
    8   1  17   -.211    .431  ?    .045    .185  58.316  <  ?  ?  ?  ?
    8   1  18    .155   2.715  ?    .024   7.373  71.076  <  ?  ?  ?  ?
    8   1  19   -.145   2.419  ?    .021   5.851 513.704  <  ?  ?  ?  ?
    8   2 -18  27.909  29.625  ? 778.929 877.623 233.263  o  ?  ?  ?  ?
    8   2 -17   8.478   6.263  ?  71.871  39.227  72.110  <  ?  ?  ?  ?
    8   2 -16    .104    .039  ?    .011    .002  62.108  <  ?  ?  ?  ?
    8   2 -15  13.848  15.549  ? 191.762 241.764 127.735  o  ?  ?  ?  ?
    8   2 -14  55.477  53.412  ? 3077.75 2852.86 313.878  o  ?  ?  ?  ?
    8   2 -13  22.555  24.267  ? 508.706 588.900  37.322  o  ?  ?  ?  ?
    8   2 -12  23.609  25.363  ? 557.370 643.281  40.367  o  ?  ?  ?  ?
    8   2 -11  10.246  13.322  ? 104.985 177.475  23.293  o  ?  ?  ?  ?
    8   2 -10  69.133  69.937  ? 4779.35 4891.17 264.076  o  ?  ?  ?  ?
    8   2  -9  30.197  29.075  ? 911.887 845.349  43.532  o  ?  ?  ?  ?
    8   2  -8  51.805  44.263  ? 2683.73 1959.21  97.948  o  ?  ?  ?  ?
    8   2  -7  19.348  21.482  ? 374.339 461.495  16.754  o  ?  ?  ?  ?
    8   2  -6  41.813  45.026  ? 1748.37 2027.36  46.817  o  ?  ?  ?  ?
    8   2  -5  18.257  22.509  ? 333.332 506.647  17.258  o  ?  ?  ?  ?
    8   2  -4 100.691  97.531  ? 10138.7 9512.24 329.214  o  ?  ?  ?  ?
    8   2  -3  17.533  17.650  ? 307.411 311.509  16.257  o  ?  ?  ?  ?
    8   2  -2  32.645  33.251  ? 1065.73 1105.64  35.116  o  ?  ?  ?  ?
    8   2  -1  28.143  30.300  ? 792.007 918.066  24.487  o  ?  ?  ?  ?
    8   2   0 103.628 102.262  ? 10738.7 10457.6 570.583  o  ?  ?  ?  ?
    8   2   1  37.096  35.196  ? 1376.11 1238.74  50.221  o  ?  ?  ?  ?
    8   2   2   1.858   3.018  ?   3.451   9.111  12.555  <  ?  ?  ?  ?
    8   2   3  23.895  25.966  ? 570.962 674.217  19.348  o  ?  ?  ?  ?
    8   2   4  86.882  83.043  ? 7548.50 6896.13 303.148  o  ?  ?  ?  ?
    8   2   5  30.837  32.646  ? 950.945 1065.77  32.978  o  ?  ?  ?  ?
    8   2   6  41.176  41.095  ? 1695.43 1688.80  51.090  o  ?  ?  ?  ?
    8   2   7  12.943  10.762  ? 167.510 115.830  20.994  o  ?  ?  ?  ?
    8   2   8  53.856  51.963  ? 2900.51 2700.12  99.161  o  ?  ?  ?  ?
    8   2   9  31.855  35.246  ? 1014.77 1242.28  46.817  o  ?  ?  ?  ?
    8   2  10  55.212  52.909  ? 3048.37 2799.40 106.595  o  ?  ?  ?  ?
    8   2  11   7.640   8.271  ?  58.367  68.413  37.322  <  ?  ?  ?  ?
    8   2  12  23.177  24.387  ? 537.156 594.730  55.550  o  ?  ?  ?  ?
    8   2  13  13.415  16.174  ? 179.963 261.595  43.532  o  ?  ?  ?  ?
    8   2  14  45.086  45.365  ? 2032.76 2057.97 158.380  o  ?  ?  ?  ?
    8   2  15   2.972   1.133  ?   8.831   1.283  44.342  <  ?  ?  ?  ?
    8   2  16    .121   1.075  ?    .015   1.155  44.342  <  ?  ?  ?  ?
    8   2  17   5.081   5.575  ?  25.815  31.076  60.197  <  ?  ?  ?  ?
    8   2  18  25.530  26.419  ? 651.795 697.990 105.338  o  ?  ?  ?  ?
    8   2  19  17.488   8.929  ? 305.829  79.725 547.473  o  ?  ?  ?  ?
    8   3 -18  10.814  10.409  ? 116.952 108.350  86.229  <  ?  ?  ?  ?
    8   3 -17  18.263  18.778  ? 333.519 352.623  45.984  o  ?  ?  ?  ?
    8   3 -16  31.917  33.926  ? 1018.70 1150.99  79.556  o  ?  ?  ?  ?
    8   3 -15  15.075  17.607  ? 227.241 310.018  39.595  o  ?  ?  ?  ?
    8   3 -14   6.067   8.268  ?  36.805  68.367  28.902  <  ?  ?  ?  ?
    8   3 -13  14.138  13.169  ? 199.897 173.412  35.116  o  ?  ?  ?  ?
    8   3 -12  54.515  55.799  ? 2971.86 3113.57 199.154  o  ?  ?  ?  ?
    8   3 -11  26.972  28.369  ? 727.482 804.789  45.160  o  ?  ?  ?  ?
    8   3 -10  37.420  37.651  ? 1400.26 1417.60  73.151  o  ?  ?  ?  ?
    8   3  -9   -.210   1.366  ?    .044   1.867  22.128  <  ?  ?  ?  ?
    8   3  -8  59.057  57.712  ? 3487.70 3330.71 123.625  o  ?  ?  ?  ?
    8   3  -7  50.172  50.556  ? 2517.27 2555.87  87.367  o  ?  ?  ?  ?
    8   3  -6  76.782  74.122  ? 5895.47 5494.01 202.618  o  ?  ?  ?  ?
    8   3  -5  20.104  18.547  ? 404.157 343.979  20.994  o  ?  ?  ?  ?
    8   3  -4  54.820  52.649  ? 3005.18 2771.89  72.110  o  ?  ?  ?  ?
    8   3  -3  47.121  45.867  ? 2220.39 2103.79  54.643  o  ?  ?  ?  ?
    8   3  -2 104.922 100.090  ? 11008.7 10017.9 335.898  o  ?  ?  ?  ?
    8   3  -1  27.730  28.568  ? 768.944 816.157  27.603  o  ?  ?  ?  ?
    8   3   0  28.025  24.823  ? 785.397 616.161  28.249  o  ?  ?  ?  ?
    8   3   1  30.933  31.445  ? 956.877 988.757  32.280  o  ?  ?  ?  ?
    8   3   2  86.065  84.246  ? 7407.21 7097.41 237.010  o  ?  ?  ?  ?
    8   3   3  29.332  25.582  ? 860.395 654.457  31.589  o  ?  ?  ?  ?
    8   3   4  25.070  26.940  ? 628.494 725.743  26.965  o  ?  ?  ?  ?
    8   3   5  23.355  23.925  ? 545.471 572.419  27.603  o  ?  ?  ?  ?
    8   3   6  54.523  53.555  ? 2972.70 2868.13 110.413  o  ?  ?  ?  ?
    8   3   7  44.775  42.777  ? 2004.76 1829.84  75.256  o  ?  ?  ?  ?
    8   3   8  47.535  45.467  ? 2259.53 2067.22 105.338  o  ?  ?  ?  ?
    8   3   9    .017   4.963  ?    .000  24.630  22.128  <  ?  ?  ?  ?
    8   3  10  27.829  30.388  ? 774.430 923.402  45.160  o  ?  ?  ?  ?
    8   3  11  31.646  31.794  ? 1001.48 1010.84  56.464  o  ?  ?  ?  ?
    8   3  12  46.684  46.484  ? 2179.35 2160.73 124.988  o  ?  ?  ?  ?
    8   3  13   9.533   9.716  ?  90.869  94.398  41.148  o  ?  ?  ?  ?
    8   3  14    .441   6.733  ?    .194  45.334  39.595  <  ?  ?  ?  ?
    8   3  15  13.314  17.118  ? 177.264 293.030  53.744  o  ?  ?  ?  ?
    8   3  16  33.338  33.897  ? 1111.45 1149.00 119.583  o  ?  ?  ?  ?
    8   3  17  12.175  12.553  ? 148.240 157.577  63.074  o  ?  ?  ?  ?
    8   3  18   7.740   5.000  ?  59.913  24.999 122.271  <  ?  ?  ?  ?
    8   4 -19  13.589  17.546  ? 184.652 307.853 105.338  o  ?  ?  ?  ?
    8   4 -18  24.949  26.977  ? 622.445 727.772  95.544  o  ?  ?  ?  ?
    8   4 -17   9.227  12.782  ?  85.135 163.369  51.967  <  ?  ?  ?  ?
    8   4 -16    .092   3.326  ?    .008  11.064  45.160  <  ?  ?  ?  ?
    8   4 -15  15.163  15.542  ? 229.922 241.541  38.072  o  ?  ?  ?  ?
    8   4 -14  30.114  30.175  ? 906.831 910.556  71.076  o  ?  ?  ?  ?
    8   4 -13  26.271  31.376  ? 690.171 984.445  57.386  o  ?  ?  ?  ?
    8   4 -12  14.035  12.783  ? 196.973 163.412  27.603  o  ?  ?  ?  ?
    8   4 -11   3.822   4.162  ?  14.609  17.322  22.128  <  ?  ?  ?  ?
    8   4 -10  42.960  40.673  ? 1845.53 1654.26 107.861  o  ?  ?  ?  ?
    8   4  -9  47.386  49.193  ? 2245.39 2419.98 115.609  o  ?  ?  ?  ?
    8   4  -8  42.362  46.295  ? 1794.53 2143.24  65.030  o  ?  ?  ?  ?
    8   4  -7   8.570   4.541  ?  73.453  20.617  16.754  o  ?  ?  ?  ?
    8   4  -6  45.785  45.784  ? 2096.23 2096.18  77.391  o  ?  ?  ?  ?
    8   4  -5  60.805  56.201  ? 3697.19 3158.51 140.465  o  ?  ?  ?  ?
    8   4  -4  61.921  60.480  ? 3834.19 3657.88 120.923  o  ?  ?  ?  ?
    8   4  -3  33.289  31.000  ? 1108.19 960.995  36.579  o  ?  ?  ?  ?
    8   4  -2  35.497  37.658  ? 1260.03 1418.09  40.367  o  ?  ?  ?  ?
    8   4  -1  42.117  40.143  ? 1773.86 1611.46  49.358  o  ?  ?  ?  ?
    8   4   0  58.180  57.735  ? 3384.86 3333.38  83.975  o  ?  ?  ?  ?
    8   4   1  52.275  55.751  ? 2732.66 3108.19  70.050  o  ?  ?  ?  ?
    8   4   2  12.481  16.473  ? 155.783 271.368  15.769  o  ?  ?  ?  ?
    8   4   3  35.395  34.887  ? 1252.79 1217.11  42.730  o  ?  ?  ?  ?
    8   4   4  59.160  62.129  ? 3499.85 3860.02  95.544  o  ?  ?  ?  ?
    8   4   5  41.478  37.800  ? 1720.42 1428.84  67.015  o  ?  ?  ?  ?
    8   4   6  26.095  25.992  ? 680.930 675.574  45.160  o  ?  ?  ?  ?
    8   4   7    .331   6.931  ?    .109  48.039  30.231  <  ?  ?  ?  ?
    8   4   8  36.283  37.845  ? 1316.43 1432.25  90.827  o  ?  ?  ?  ?
    8   4   9  46.364  48.422  ? 2149.62 2344.74 131.911  o  ?  ?  ?  ?
    8   4  10  29.619  28.741  ? 877.297 826.044  72.110  o  ?  ?  ?  ?
    8   4  11  14.643  12.497  ? 214.416 156.174  45.160  o  ?  ?  ?  ?
    8   4  12   7.503  11.436  ?  56.297 130.772  53.744  <  ?  ?  ?  ?
    8   4  13  25.214  26.216  ? 635.737 687.261  66.019  o  ?  ?  ?  ?
    8   4  14  31.201  32.341  ? 973.473 1045.92 109.133  o  ?  ?  ?  ?
    8   4  15  12.240  11.734  ? 149.819 137.685  55.550  o  ?  ?  ?  ?
    8   4  16   3.567   1.324  ?  12.724   1.754  52.852  <  ?  ?  ?  ?
    8   4  17  14.872  15.169  ? 221.176 230.105  95.544  o  ?  ?  ?  ?
    8   4  18  16.905  23.081  ? 285.795 532.742 161.470  o  ?  ?  ?  ?
    8   5 -18   6.281   5.427  ?  39.450  29.447  54.643  <  ?  ?  ?  ?
    8   5 -17  15.831  17.535  ? 250.606 307.491  67.015  o  ?  ?  ?  ?
    8   5 -16  21.653  21.833  ? 468.872 476.663  80.649  o  ?  ?  ?  ?
    8   5 -15  20.561  21.503  ? 422.740 462.385  71.076  o  ?  ?  ?  ?
    8   5 -14   4.539   3.952  ?  20.605  15.621  43.532  <  ?  ?  ?  ?
    8   5 -13  13.817  15.425  ? 190.912 237.931  50.221  o  ?  ?  ?  ?
    8   5 -12  33.719  32.553  ? 1136.99 1059.67  64.048  o  ?  ?  ?  ?
    8   5 -11  42.784  42.250  ? 1830.48 1785.07  95.544  o  ?  ?  ?  ?
    8   5 -10  16.164  16.362  ? 261.260 267.730  32.280  o  ?  ?  ?  ?
    8   5  -9   2.096   5.513  ?   4.392  30.395  21.557  <  ?  ?  ?  ?
    8   5  -8  26.098  26.675  ? 681.132 711.558  31.589  o  ?  ?  ?  ?
    8   5  -7  55.689  56.985  ? 3101.29 3247.25  94.354  o  ?  ?  ?  ?
    8   5  -6  24.942  29.401  ? 622.082 864.417  34.396  o  ?  ?  ?  ?
    8   5  -5  19.087  18.100  ? 364.317 327.628  28.902  o  ?  ?  ?  ?
    8   5  -4  21.430  22.388  ? 459.243 501.202  28.902  o  ?  ?  ?  ?
    8   5  -3  61.453  62.034  ? 3776.50 3848.16 126.357  o  ?  ?  ?  ?
    8   5  -2  27.514  27.329  ? 757.019 746.886  30.906  o  ?  ?  ?  ?
    8   5  -1  52.398  51.475  ? 2745.58 2649.70  75.256  o  ?  ?  ?  ?
    8   5   0  11.142  11.076  ? 124.143 122.667  16.754  o  ?  ?  ?  ?
    8   5   1  56.221  55.685  ? 3160.75 3100.82  88.513  o  ?  ?  ?  ?
    8   5   2  53.300  53.767  ? 2840.93 2890.92  80.649  o  ?  ?  ?  ?
    8   5   3  42.839  43.054  ? 1835.19 1853.69  57.386  o  ?  ?  ?  ?
    8   5   4  13.006  15.018  ? 169.165 225.551  25.095  o  ?  ?  ?  ?
    8   5   5  16.579  16.920  ? 274.865 286.280  39.595  o  ?  ?  ?  ?
    8   5   6  39.177  41.031  ? 1534.83 1683.51  96.742  o  ?  ?  ?  ?
    8   5   7  47.928  47.729  ? 2297.14 2278.09 139.021  o  ?  ?  ?  ?
    8   5   8  20.487  21.706  ? 419.701 471.131  58.316  o  ?  ?  ?  ?
    8   5   9  16.184  16.289  ? 261.914 265.324  48.504  o  ?  ?  ?  ?
    8   5  10  24.538  26.774  ? 602.135 716.830  64.048  o  ?  ?  ?  ?
    8   5  11  44.947  46.558  ? 2020.24 2167.66 155.319  o  ?  ?  ?  ?
    8   5  12  20.105  19.623  ? 404.192 385.077  61.148  o  ?  ?  ?  ?
    8   5  13   9.937  11.293  ?  98.738 127.534  62.108  <  ?  ?  ?  ?
    8   5  14   5.293   7.896  ?  28.014  62.345  73.151  <  ?  ?  ?  ?
    8   5  15  20.482  21.040  ? 419.518 442.691 111.701  o  ?  ?  ?  ?
    8   5  16  15.227  18.999  ? 231.865 360.952 100.381  o  ?  ?  ?  ?
    8   5  17   8.978  14.810  ?  80.602 219.339 340.392  <  ?  ?  ?  ?
    8   6 -17  12.954  13.068  ? 167.810 170.780  68.019  o  ?  ?  ?  ?
    8   6 -16   3.104   2.027  ?   9.635   4.107  53.744  <  ?  ?  ?  ?
    8   6 -15  17.835  18.593  ? 318.087 345.705  69.031  o  ?  ?  ?  ?
    8   6 -14  19.133  17.141  ? 366.086 293.801  71.076  o  ?  ?  ?  ?
    8   6 -13  27.216  25.881  ? 740.720 669.841  99.161  o  ?  ?  ?  ?
    8   6 -12    .279   3.057  ?    .078   9.348  41.935  <  ?  ?  ?  ?
    8   6 -11  13.398  14.106  ? 179.513 198.980  41.935  o  ?  ?  ?  ?
    8   6 -10  26.816  26.124  ? 719.076 682.475  74.200  o  ?  ?  ?  ?
    8   6  -9  53.158  51.923  ? 2825.76 2696.04 147.799  o  ?  ?  ?  ?
    8   6  -8  16.511  18.053  ? 272.604 325.898  26.965  o  ?  ?  ?  ?
    8   6  -7   5.064   2.316  ?  25.641   5.363  17.769  <  ?  ?  ?  ?
    8   6  -6  14.772  15.432  ? 218.223 238.149  23.293  o  ?  ?  ?  ?
    8   6  -5  59.491  61.437  ? 3539.24 3774.46 124.988  o  ?  ?  ?  ?
    8   6  -4  26.214  26.631  ? 687.174 709.227  36.579  o  ?  ?  ?  ?
    8   6  -3  20.699  21.202  ? 428.431 449.545  27.603  o  ?  ?  ?  ?
    8   6  -2   6.717   5.277  ?  45.119  27.845  18.814  <  ?  ?  ?  ?
    8   6  -1  48.666  46.626  ? 2368.34 2173.95  65.030  o  ?  ?  ?  ?
    8   6   0  39.273  39.329  ? 1542.40 1546.74  47.656  o  ?  ?  ?  ?
    8   6   1  42.458  41.348  ? 1802.65 1709.65  54.643  o  ?  ?  ?  ?
    8   6   2  10.089   6.333  ? 101.795  40.104  18.288  o  ?  ?  ?  ?
    8   6   3  35.634  35.346  ? 1269.80 1249.31  51.090  o  ?  ?  ?  ?
    8   6   4  33.040  34.185  ? 1091.62 1168.62  86.229  o  ?  ?  ?  ?
    8   6   5  52.738  55.692  ? 2781.27 3101.64 159.921  o  ?  ?  ?  ?
    8   6   6  10.325  13.163  ? 106.598 173.269  37.322  o  ?  ?  ?  ?
    8   6   7  10.293  11.244  ? 105.945 126.433  39.595  o  ?  ?  ?  ?
    8   6   8  20.104  19.298  ? 404.153 372.418  59.252  o  ?  ?  ?  ?
    8   6   9  45.615  45.969  ? 2080.76 2113.16 166.161  o  ?  ?  ?  ?
    8   6  10  27.945  28.644  ? 780.916 820.465  90.827  o  ?  ?  ?  ?
    8   6  11  11.310  12.262  ? 127.915 150.355  49.358  o  ?  ?  ?  ?
    8   6  12  12.005  14.564  ? 144.125 212.116  51.967  o  ?  ?  ?  ?
    8   6  13  29.481  31.187  ? 869.141 972.646  91.995  o  ?  ?  ?  ?
    8   6  14  14.159  13.808  ? 200.479 190.654  76.320  o  ?  ?  ?  ?
    8   6  15  11.091  14.947  ? 123.012 223.418  86.229  o  ?  ?  ?  ?
    8   7 -15  19.369  20.022  ? 375.156 400.889  91.995  o  ?  ?  ?  ?
    8   7 -14   -.029    .286  ?    .001    .082  59.252  <  ?  ?  ?  ?
    8   7 -13  19.107  20.185  ? 365.083 407.452  77.391  o  ?  ?  ?  ?
    8   7 -12  11.186  11.502  ? 125.130 132.294  54.643  o  ?  ?  ?  ?
    8   7 -11  36.312  36.820  ? 1318.53 1355.68 156.846  o  ?  ?  ?  ?
    8   7 -10    .261   5.039  ?    .068  25.395  36.579  <  ?  ?  ?  ?
    8   7  -9   8.189   9.744  ?  67.054  94.938  45.160  <  ?  ?  ?  ?
    8   7  -8  14.389  14.212  ? 207.046 201.989  37.322  o  ?  ?  ?  ?
    8   7  -7  51.204  50.270  ? 2621.87 2527.12 140.465  o  ?  ?  ?  ?
    8   7  -6  16.253  14.292  ? 264.156 204.250  41.148  o  ?  ?  ?  ?
    8   7  -5   7.711   6.999  ?  59.458  48.991  28.902  <  ?  ?  ?  ?
    8   7  -4   9.583   9.353  ?  91.832  87.484  25.711  o  ?  ?  ?  ?
    8   7  -3  47.313  46.641  ? 2238.49 2175.41 130.511  o  ?  ?  ?  ?
    8   7  -2  15.061  15.017  ? 226.848 225.522  32.280  o  ?  ?  ?  ?
    8   7  -1  31.850  31.211  ? 1014.42 974.132  62.108  o  ?  ?  ?  ?
    8   7   0   8.798   9.452  ?  77.404  89.337  22.128  o  ?  ?  ?  ?
    8   7   1  35.089  33.349  ? 1231.27 1112.13  55.550  o  ?  ?  ?  ?
    8   7   2  24.368  27.024  ? 593.817 730.308  51.967  o  ?  ?  ?  ?
    8   7   3  53.151  54.611  ? 2824.99 2982.35 194.015  o  ?  ?  ?  ?
    8   7   4  11.526   9.461  ? 132.847  89.515  40.367  o  ?  ?  ?  ?
    8   7   5  22.019  24.942  ? 484.821 622.110  60.197  o  ?  ?  ?  ?
    8   7   6  16.134  16.308  ? 260.317 265.957  53.744  o  ?  ?  ?  ?
    8   7   7  52.145  52.034  ? 2719.13 2707.51 220.383  o  ?  ?  ?  ?
    8   7   8   9.866  11.603  ?  97.330 134.624  45.984  o  ?  ?  ?  ?
    8   7   9   7.745   6.527  ?  59.987  42.606  48.504  <  ?  ?  ?  ?
    8   7  10    .837   6.259  ?    .701  39.169  53.744  <  ?  ?  ?  ?
    8   7  11  31.342  32.606  ? 982.291 1063.14 114.299  o  ?  ?  ?  ?
    8   7  12  11.134  11.618  ? 123.968 134.984  65.030  o  ?  ?  ?  ?
    8   7  13  13.314  13.536  ? 177.251 183.232  70.050  o  ?  ?  ?  ?
    8   8 -13  27.488  25.471  ? 755.572 648.797 188.943  o  ?  ?  ?  ?
    8   8 -12    .006   2.564  ?    .000   6.575  58.316  <  ?  ?  ?  ?
    8   8 -11  12.646  12.658  ? 159.918 160.216  66.019  o  ?  ?  ?  ?
    8   8 -10   9.477   4.356  ?  89.814  18.975  67.015  <  ?  ?  ?  ?
    8   8  -9  45.523  46.021  ? 2072.35 2117.89 180.639  o  ?  ?  ?  ?
    8   8  -8   4.754   3.878  ?  22.597  15.038  34.396  <  ?  ?  ?  ?
    8   8  -7   5.225   1.101  ?  27.299   1.213  34.396  <  ?  ?  ?  ?
    8   8  -6   4.510   2.222  ?  20.343   4.936  32.978  <  ?  ?  ?  ?
    8   8  -5  47.147  46.395  ? 2222.85 2152.48 137.584  o  ?  ?  ?  ?
    8   8  -4   5.462   5.368  ?  29.829  28.818  35.844  <  ?  ?  ?  ?
    8   8  -3  21.146  20.351  ? 447.170 414.171  54.643  o  ?  ?  ?  ?
    8   8  -2    .073   1.980  ?    .005   3.920  32.280  <  ?  ?  ?  ?
    8   8  -1  41.282  40.057  ? 1704.24 1604.56 105.338  o  ?  ?  ?  ?
    8   8   0   4.572   8.623  ?  20.900  74.363  30.906  <  ?  ?  ?  ?
    8   8   1  37.152  37.203  ? 1380.28 1384.04  94.354  o  ?  ?  ?  ?
    8   8   2    .051    .514  ?    .003    .264  38.830  <  ?  ?  ?  ?
    8   8   3  24.268  25.303  ? 588.941 640.264  62.108  o  ?  ?  ?  ?
    8   8   4   6.392   6.842  ?  40.856  46.813  38.830  <  ?  ?  ?  ?
    8   8   5  44.297  45.196  ? 1962.23 2042.66 199.154  o  ?  ?  ?  ?
    8   8   6   -.144    .928  ?    .021    .861  40.367  <  ?  ?  ?  ?
    8   8   7   5.324   6.525  ?  28.344  42.570  45.160  <  ?  ?  ?  ?
    8   8   8    .186    .453  ?    .035    .205  45.984  <  ?  ?  ?  ?
    8   8   9  35.497  35.448  ? 1260.02 1256.53 140.465  o  ?  ?  ?  ?
    8   8  10    .157   3.566  ?    .025  12.719  55.550  <  ?  ?  ?  ?
    8   8  11   7.130   6.115  ?  50.835  37.397  62.108  <  ?  ?  ?  ?
    8   8  12   -.078    .658  ?    .006    .434 127.735  <  ?  ?  ?  ?
    8   8  13  25.968  24.538  ? 674.356 602.137 396.644  o  ?  ?  ?  ?
    8   9 -10   2.950   2.502  ?   8.701   6.258  76.320  <  ?  ?  ?  ?
    8   9  -9    .230   5.251  ?    .053  27.573  58.316  <  ?  ?  ?  ?
    8   9  -8   5.562   4.320  ?  30.940  18.664  51.090  <  ?  ?  ?  ?
    8   9  -7  38.142  38.079  ? 1454.85 1450.03 114.299  o  ?  ?  ?  ?
    8   9  -6    .111    .610  ?    .012    .372  41.148  <  ?  ?  ?  ?
    8   9  -5   9.677   9.279  ?  93.645  86.106  45.160  o  ?  ?  ?  ?
    8   9  -4   5.826   2.796  ?  33.940   7.816  43.532  <  ?  ?  ?  ?
    8   9  -3  37.190  35.432  ? 1383.13 1255.45 110.413  o  ?  ?  ?  ?
    8   9  -2    .097   2.816  ?    .009   7.928  45.984  <  ?  ?  ?  ?
    8   9  -1  23.087  23.379  ? 533.005 546.576  68.019  o  ?  ?  ?  ?
    8   9   0   4.616   5.399  ?  21.308  29.154  35.844  <  ?  ?  ?  ?
    8   9   1  28.160  29.023  ? 792.962 842.329  82.859  o  ?  ?  ?  ?
    8   9   2   5.684   3.915  ?  32.307  15.328  44.342  <  ?  ?  ?  ?
    8   9   3  32.958  34.959  ? 1086.20 1222.10 107.861  o  ?  ?  ?  ?
    8   9   4   8.203   6.871  ?  67.292  47.205  53.744  <  ?  ?  ?  ?
    8   9   5  15.674  13.313  ? 245.670 177.244  64.048  o  ?  ?  ?  ?
    8   9   6    .031   3.178  ?    .001  10.097  51.967  <  ?  ?  ?  ?
    8   9   7  32.152  31.990  ? 1033.75 1023.38 122.271  o  ?  ?  ?  ?
    8   9   8   -.038    .213  ?    .001    .045  54.643  <  ?  ?  ?  ?
    8   9   9    .038    .425  ?    .001    .180  62.108  <  ?  ?  ?  ?
    8  10  -7   8.479   4.255  ?  71.901  18.105 342.650  <  ?  ?  ?  ?
    8  10  -6   5.193   2.781  ?  26.970   7.732  50.221  <  ?  ?  ?  ?
    8  10  -5  31.471  30.039  ? 990.408 902.333 105.338  o  ?  ?  ?  ?
    8  10  -4   2.272   6.133  ?   5.162  37.617  48.504  <  ?  ?  ?  ?
    8  10  -3  13.330  13.451  ? 177.701 180.928  64.048  o  ?  ?  ?  ?
    8  10  -2    .069   2.701  ?    .005   7.293  46.817  <  ?  ?  ?  ?
    8  10  -1  27.583  27.604  ? 760.795 762.005  97.948  o  ?  ?  ?  ?
    8  10   0   8.005   8.023  ?  64.087  64.370  74.200  <  ?  ?  ?  ?
    8  10   1  27.000  25.328  ? 728.977 641.482 120.923  o  ?  ?  ?  ?
    8  10   2   3.019   4.428  ?   9.112  19.607  59.252  <  ?  ?  ?  ?
    8  10   3  19.355  21.022  ? 374.614 441.938  76.320  o  ?  ?  ?  ?
    8  10   4   3.812   6.229  ?  14.531  38.799  57.386  <  ?  ?  ?  ?
    8  10   5  25.460  25.537  ? 648.213 652.119  96.742  o  ?  ?  ?  ?
    8  10   6  11.418   5.899  ? 130.362  34.796 324.795  <  ?  ?  ?  ?
    8  10   7    .208   3.106  ?    .043   9.644 296.800  <  ?  ?  ?  ?
    8  11  -5  11.268   5.896  ? 126.974  34.761 418.846  <  ?  ?  ?  ?
    8  11  -3  26.225  23.635  ? 687.740 558.621 645.880  o  ?  ?  ?  ?
    8  11  -2   9.599  11.206  ?  92.133 125.583 522.046  <  ?  ?  ?  ?
    8  11   4  13.628   7.220  ? 185.714  52.125 370.328  <  ?  ?  ?  ?
    9   0 -15  32.913  30.675  ? 1083.29 940.955 146.317  o  ?  ?  ?  ?
    9   0 -13  45.872  46.694  ? 2104.21 2180.33 220.383  o  ?  ?  ?  ?
    9   0 -11  17.477  19.045  ? 305.441 362.703  74.200  o  ?  ?  ?  ?
    9   0  -9  64.138  58.337  ? 4113.72 3403.21 349.468  o  ?  ?  ?  ?
    9   0  -7  24.250  18.209  ? 588.059 331.558  99.161  o  ?  ?  ?  ?
    9   0  -5 105.523  97.580  ? 11135.2 9521.90 1730.85  o  ?  ?  ?  ?
    9   0  -3  54.916  51.198  ? 3015.71 2621.27 292.605  o  ?  ?  ?  ?
    9   0  -1 101.500 102.504  ? 10302.3 10507.1 914.483  o  ?  ?  ?  ?
    9   0   1  57.284  55.841  ? 3281.42 3118.22 200.882  o  ?  ?  ?  ?
    9   0   3  44.718  47.349  ? 1999.74 2241.92 124.988  o  ?  ?  ?  ?
    9   0   5  69.976  65.992  ? 4896.69 4354.91 451.985  o  ?  ?  ?  ?
    9   0   7  13.105  14.675  ? 171.740 215.359  47.656  o  ?  ?  ?  ?
    9   0   9  77.386  72.672  ? 5988.65 5281.19 2721.95  o  ?  ?  ?  ?
    9   0  11   7.098   3.723  ?  50.377  13.862  65.030  <  ?  ?  ?  ?
    9   0  13  39.617  38.388  ? 1569.50 1473.65 211.407  o  ?  ?  ?  ?
    9   0  15  23.224  24.578  ? 539.355 604.076 209.634  o  ?  ?  ?  ?
    9   0  17  19.662  21.136  ? 386.603 446.722 202.618  o  ?  ?  ?  ?
    9   1 -18   -.044    .394  ?    .002    .155 111.701  <  ?  ?  ?  ?
    9   1 -17  19.738  23.889  ? 389.569 570.669  96.742  o  ?  ?  ?  ?
    9   1 -16    .316   5.654  ?    .100  31.964  55.550  <  ?  ?  ?  ?
    9   1 -15  31.163  32.680  ? 971.153 1067.96  69.031  o  ?  ?  ?  ?
    9   1 -14   -.050    .006  ?    .003    .000  28.902  <  ?  ?  ?  ?
    9   1 -13  24.276  24.448  ? 589.323 597.722  48.504  o  ?  ?  ?  ?
    9   1 -12   9.370   7.714  ?  87.805  59.512  28.902  o  ?  ?  ?  ?
    9   1 -11  61.644  62.486  ? 3799.92 3904.56 211.407  o  ?  ?  ?  ?
    9   1 -10  12.607  10.316  ? 158.942 106.430  32.280  o  ?  ?  ?  ?
    9   1  -9  12.748  12.819  ? 162.501 164.326  31.589  o  ?  ?  ?  ?
    9   1  -8  11.115  14.441  ? 123.534 208.531  27.603  o  ?  ?  ?  ?
    9   1  -7  78.705  72.484  ? 6194.41 5253.90 351.756  o  ?  ?  ?  ?
    9   1  -6  16.098  14.606  ? 259.131 213.334  23.886  o  ?  ?  ?  ?
    9   1  -5  29.106  30.003  ? 847.179 900.201  44.342  o  ?  ?  ?  ?
    9   1  -4   6.405  12.007  ?  41.023 144.166  20.994  <  ?  ?  ?  ?
    9   1  -3 102.845  96.563  ? 10577.1 9324.46 541.770  o  ?  ?  ?  ?
    9   1  -2  16.684  18.868  ? 278.357 356.000  26.965  o  ?  ?  ?  ?
    9   1  -1  49.100  49.280  ? 2410.82 2428.52  86.229  o  ?  ?  ?  ?
    9   1   0  13.122  13.969  ? 172.186 195.146  26.965  o  ?  ?  ?  ?
    9   1   1  64.805  60.066  ? 4199.64 3607.89 183.938  o  ?  ?  ?  ?
    9   1   2    .551   7.162  ?    .303  51.296  20.438  <  ?  ?  ?  ?
    9   1   3  73.529  70.663  ? 5406.57 4993.20 192.317  o  ?  ?  ?  ?
    9   1   4   6.496   5.688  ?  42.193  32.350  17.769  <  ?  ?  ?  ?
    9   1   5  19.795  22.608  ? 391.850 511.107  24.487  o  ?  ?  ?  ?
    9   1   6   4.442  11.125  ?  19.731 123.764  19.348  <  ?  ?  ?  ?
    9   1   7  72.429  66.638  ? 5245.95 4440.67 224.025  o  ?  ?  ?  ?
    9   1   8  11.585  10.554  ? 134.212 111.382  30.231  o  ?  ?  ?  ?
    9   1   9   3.198    .448  ?  10.229    .201  28.249  <  ?  ?  ?  ?
    9   1  10   -.309   1.495  ?    .095   2.236  38.830  <  ?  ?  ?  ?
    9   1  11  63.263  58.798  ? 4002.18 3457.20 451.985  o  ?  ?  ?  ?
    9   1  12  15.854  14.169  ? 251.341 200.758  58.316  o  ?  ?  ?  ?
    9   1  13  18.012  18.073  ? 324.442 326.648  65.030  o  ?  ?  ?  ?
    9   1  14    .103   2.969  ?    .011   8.818  50.221  <  ?  ?  ?  ?
    9   1  15  25.000  28.080  ? 624.996 788.482 105.338  o  ?  ?  ?  ?
    9   1  16   5.017   6.803  ?  25.171  46.275  63.074  <  ?  ?  ?  ?
    9   1  17  21.451  21.624  ? 460.134 467.617 115.609  o  ?  ?  ?  ?
    9   2 -18   9.299  11.693  ?  86.476 136.730 153.800  <  ?  ?  ?  ?
    9   2 -17  20.210  21.450  ? 408.448 460.108 127.735  o  ?  ?  ?  ?
    9   2 -16   8.383   6.123  ?  70.268  37.493 159.921  <  ?  ?  ?  ?
    9   2 -15  25.773  28.102  ? 664.262 789.708 137.584  o  ?  ?  ?  ?
    9   2 -14  12.697  15.286  ? 161.211 233.655  85.098  o  ?  ?  ?  ?
    9   2 -13  43.941  42.172  ? 1930.81 1778.50 161.470  o  ?  ?  ?  ?
    9   2 -12    .220   5.006  ?    .048  25.057  28.249  <  ?  ?  ?  ?
    9   2 -11  19.472  21.446  ? 379.161 459.916  41.935  o  ?  ?  ?  ?
    9   2 -10  12.842  13.581  ? 164.911 184.441  32.280  o  ?  ?  ?  ?
    9   2  -9  61.938  56.962  ? 3836.34 3244.66 344.915  o  ?  ?  ?  ?
    9   2  -8  12.243  12.845  ? 149.901 164.987  28.902  o  ?  ?  ?  ?
    9   2  -7   7.925   2.246  ?  62.812   5.044  17.258  o  ?  ?  ?  ?
    9   2  -6  17.149  17.190  ? 294.098 295.500  25.711  o  ?  ?  ?  ?
    9   2  -5  77.917  76.798  ? 6071.11 5897.92 199.154  o  ?  ?  ?  ?
    9   2  -4  34.456  35.009  ? 1187.22 1225.60  52.852  o  ?  ?  ?  ?
    9   2  -3  29.313  30.816  ? 859.228 949.618  42.730  o  ?  ?  ?  ?
    9   2  -2  21.300  19.287  ? 453.679 371.993  33.683  o  ?  ?  ?  ?
    9   2  -1  77.967  74.452  ? 6078.90 5543.10 274.097  o  ?  ?  ?  ?
    9   2   0  36.448  37.205  ? 1328.44 1384.18  61.148  o  ?  ?  ?  ?
    9   2   1  59.671  58.161  ? 3560.57 3382.74 141.917  o  ?  ?  ?  ?
    9   2   2  16.893  17.060  ? 285.390 291.029  21.557  o  ?  ?  ?  ?
    9   2   3  31.425  30.677  ? 987.546 941.109  37.322  o  ?  ?  ?  ?
    9   2   4  15.441  17.097  ? 238.419 292.315  24.487  o  ?  ?  ?  ?
    9   2   5  81.289  77.951  ? 6607.92 6076.37 216.770  o  ?  ?  ?  ?
    9   2   6   7.563   5.574  ?  57.194  31.071  20.994  <  ?  ?  ?  ?
    9   2   7  10.360  12.912  ? 107.326 166.709  20.438  o  ?  ?  ?  ?
    9   2   8  13.032  17.236  ? 169.846 297.091  25.711  o  ?  ?  ?  ?
    9   2   9  63.525  59.566  ? 4035.38 3548.09 207.869  o  ?  ?  ?  ?
    9   2  10  17.189  16.061  ? 295.450 257.950  46.817  o  ?  ?  ?  ?
    9   2  11   9.164   9.895  ?  83.977  97.911  41.148  o  ?  ?  ?  ?
    9   2  12   2.867   5.039  ?   8.217  25.391  39.595  <  ?  ?  ?  ?
    9   2  13  38.084  39.458  ? 1450.35 1556.92 106.595  o  ?  ?  ?  ?
    9   2  14  11.549  13.317  ? 133.376 177.331  51.090  o  ?  ?  ?  ?
    9   2  15  21.139  19.963  ? 446.844 398.511  73.151  o  ?  ?  ?  ?
    9   2  16    .054    .594  ?    .003    .353  57.386  <  ?  ?  ?  ?
    9   2  17  19.298  17.184  ? 372.431 295.300 149.288  o  ?  ?  ?  ?
    9   2  18    .374   9.787  ?    .140  95.781 423.862  <  ?  ?  ?  ?
    9   3 -17  25.764  25.409  ? 663.761 645.624 152.289  o  ?  ?  ?  ?
    9   3 -16  17.900  18.660  ? 320.410 348.178 124.988  o  ?  ?  ?  ?
    9   3 -15  25.565  25.461  ? 653.561 648.282 153.800  o  ?  ?  ?  ?
    9   3 -14   6.908   4.269  ?  47.715  18.222  81.750  <  ?  ?  ?  ?
    9   3 -13  23.252  23.566  ? 540.643 555.341 122.271  o  ?  ?  ?  ?
    9   3 -12  26.665  26.875  ? 711.016 722.275 126.357  o  ?  ?  ?  ?
    9   3 -11  51.255  46.755  ? 2627.11 2185.99 266.065  o  ?  ?  ?  ?
    9   3 -10  16.751  18.323  ? 280.601 335.750  64.048  o  ?  ?  ?  ?
    9   3  -9  23.840  23.280  ? 568.352 541.952  43.532  o  ?  ?  ?  ?
    9   3  -8  29.452  28.203  ? 867.392 795.416  32.280  o  ?  ?  ?  ?
    9   3  -7  46.901  45.792  ? 2199.67 2096.92  62.108  o  ?  ?  ?  ?
    9   3  -6  26.307  29.062  ? 692.032 844.573  27.603  o  ?  ?  ?  ?
    9   3  -5  11.210  16.138  ? 125.653 260.440  15.769  o  ?  ?  ?  ?
    9   3  -4  21.067  21.453  ? 443.798 460.227  23.886  o  ?  ?  ?  ?
    9   3  -3  63.316  65.324  ? 4008.86 4267.18 102.845  o  ?  ?  ?  ?
    9   3  -2  39.778  40.852  ? 1582.33 1668.89  50.221  o  ?  ?  ?  ?
    9   3  -1  40.516  39.111  ? 1641.54 1529.63  51.967  o  ?  ?  ?  ?
    9   3   0   -.096    .008  ?    .009    .000  12.555  <  ?  ?  ?  ?
    9   3   1  45.799  48.883  ? 2097.57 2389.55  74.200  o  ?  ?  ?  ?
    9   3   2  37.578  40.586  ? 1412.13 1647.21  45.984  o  ?  ?  ?  ?
    9   3   3  60.323  60.021  ? 3638.92 3602.50 105.338  o  ?  ?  ?  ?
    9   3   4   8.460  10.698  ?  71.570 114.454  19.889  o  ?  ?  ?  ?
    9   3   5  22.121  24.152  ? 489.337 583.341  32.978  o  ?  ?  ?  ?
    9   3   6  32.016  31.097  ? 1025.00 967.002  70.050  o  ?  ?  ?  ?
    9   3   7  61.005  60.555  ? 3721.63 3666.90 150.785  o  ?  ?  ?  ?
    9   3   8  29.099  26.882  ? 846.762 722.618  57.386  o  ?  ?  ?  ?
    9   3   9   -.073   2.734  ?    .005   7.474  31.589  <  ?  ?  ?  ?
    9   3  10  10.891  14.082  ? 118.605 198.316  41.148  o  ?  ?  ?  ?
    9   3  11  40.984  42.091  ? 1679.71 1771.67 166.161  o  ?  ?  ?  ?
    9   3  12  17.258  18.097  ? 297.824 327.499  80.649  o  ?  ?  ?  ?
    9   3  13  15.373  14.929  ? 236.344 222.876  82.859  o  ?  ?  ?  ?
    9   3  14   5.883   8.151  ?  34.611  66.445  44.342  <  ?  ?  ?  ?
    9   3  15  20.800  23.299  ? 432.633 542.840  67.015  o  ?  ?  ?  ?
    9   3  16  13.563  14.973  ? 183.952 224.184  59.252  o  ?  ?  ?  ?
    9   3  17  18.149  18.024  ? 329.373 324.877 102.845  o  ?  ?  ?  ?
    9   4 -18  16.599  19.067  ? 275.532 363.534 322.597  o  ?  ?  ?  ?
    9   4 -17   7.883  13.566  ?  62.139 184.038 262.094  <  ?  ?  ?  ?
    9   4 -16   5.407   1.163  ?  29.237   1.351 115.609  <  ?  ?  ?  ?
    9   4 -15  19.966  18.889  ? 398.642 356.782 118.251  o  ?  ?  ?  ?
    9   4 -14  29.150  29.340  ? 849.705 860.820  79.556  o  ?  ?  ?  ?
    9   4 -13  26.248  27.353  ? 688.969 748.202  61.148  o  ?  ?  ?  ?
    9   4 -12  15.749  12.715  ? 248.021 161.668  36.579  o  ?  ?  ?  ?
    9   4 -11  15.632  16.595  ? 244.355 275.396  41.935  o  ?  ?  ?  ?
    9   4 -10  30.030  27.075  ? 901.802 733.081  61.148  o  ?  ?  ?  ?
    9   4  -9  49.694  49.507  ? 2469.50 2450.99 130.511  o  ?  ?  ?  ?
    9   4  -8  33.798  36.454  ? 1142.30 1328.89  51.967  o  ?  ?  ?  ?
    9   4  -7   -.049    .222  ?    .002    .049  17.769  <  ?  ?  ?  ?
    9   4  -6  31.687  31.816  ? 1004.04 1012.25  38.072  o  ?  ?  ?  ?
    9   4  -5  49.081  48.575  ? 2408.93 2359.53  76.320  o  ?  ?  ?  ?
    9   4  -4  39.044  42.092  ? 1524.47 1771.75  50.221  o  ?  ?  ?  ?
    9   4  -3  18.648  19.616  ? 347.763 384.795  21.557  o  ?  ?  ?  ?
    9   4  -2    .527    .222  ?    .278    .049  13.888  <  ?  ?  ?  ?
    9   4  -1  36.430  35.770  ? 1327.15 1279.49  47.656  o  ?  ?  ?  ?
    9   4   0  44.240  44.029  ? 1957.21 1938.57  61.148  o  ?  ?  ?  ?
    9   4   1  40.943  38.597  ? 1676.36 1489.75  57.386  o  ?  ?  ?  ?
    9   4   2  23.260  22.602  ? 541.017 510.834  28.902  o  ?  ?  ?  ?
    9   4   3  19.895  21.158  ? 395.817 447.651  26.334  o  ?  ?  ?  ?
    9   4   4  52.380  51.844  ? 2743.68 2687.76  99.161  o  ?  ?  ?  ?
    9   4   5  52.580  51.207  ? 2764.66 2622.12 111.701  o  ?  ?  ?  ?
    9   4   6  25.654  25.354  ? 658.103 642.850  46.817  o  ?  ?  ?  ?
    9   4   7  12.244  12.881  ? 149.924 165.919  42.730  o  ?  ?  ?  ?
    9   4   8  28.795  28.939  ? 829.131 837.485  72.110  o  ?  ?  ?  ?
    9   4   9  36.746  38.100  ? 1350.25 1451.60  96.742  o  ?  ?  ?  ?
    9   4  10  28.976  29.672  ? 839.609 880.437  73.151  o  ?  ?  ?  ?
    9   4  11   4.777   5.730  ?  22.820  32.834  35.844  <  ?  ?  ?  ?
    9   4  12  12.026  14.103  ? 144.629 198.906  72.110  o  ?  ?  ?  ?
    9   4  13  22.772  25.859  ? 518.560 668.667  93.171  o  ?  ?  ?  ?
    9   4  14  17.261  17.188  ? 297.932 295.429  97.948  o  ?  ?  ?  ?
    9   4  15  14.593  13.590  ? 212.968 184.680  93.171  o  ?  ?  ?  ?
    9   4  16    .069   2.331  ?    .005   5.431 166.161  <  ?  ?  ?  ?
    9   5 -17  13.399  16.244  ? 179.520 263.870  82.859  o  ?  ?  ?  ?
    9   5 -16  21.773  23.082  ? 474.069 532.774  91.995  o  ?  ?  ?  ?
    9   5 -15   8.359  10.993  ?  69.881 120.842  58.316  <  ?  ?  ?  ?
    9   5 -14    .178   3.212  ?    .032  10.320  51.090  <  ?  ?  ?  ?
    9   5 -13  11.210   9.145  ? 125.675  83.623  39.595  o  ?  ?  ?  ?
    9   5 -12  32.387  31.420  ? 1048.92 987.234  95.544  o  ?  ?  ?  ?
    9   5 -11  26.704  28.929  ? 713.099 836.858  60.197  o  ?  ?  ?  ?
    9   5 -10  15.381  18.109  ? 236.563 327.938  36.579  o  ?  ?  ?  ?
    9   5  -9   4.641   4.209  ?  21.539  17.713  25.095  <  ?  ?  ?  ?
    9   5  -8  30.578  31.029  ? 935.003 962.795  51.090  o  ?  ?  ?  ?
    9   5  -7  42.187  41.612  ? 1779.75 1731.56  78.470  o  ?  ?  ?  ?
    9   5  -6  36.558  35.840  ? 1336.47 1284.50  63.074  o  ?  ?  ?  ?
    9   5  -5  10.579   7.498  ? 111.917  56.214  18.814  o  ?  ?  ?  ?
    9   5  -4  20.285  18.349  ? 411.496 336.681  26.334  o  ?  ?  ?  ?
    9   5  -3  42.478  39.069  ? 1804.41 1526.41  62.108  o  ?  ?  ?  ?
    9   5  -2  51.924  49.705  ? 2696.07 2470.57  86.229  o  ?  ?  ?  ?
    9   5  -1  25.993  26.208  ? 675.632 686.857  35.116  o  ?  ?  ?  ?
    9   5   0   2.399   4.762  ?   5.757  22.679  16.257  <  ?  ?  ?  ?
    9   5   1  26.410  27.658  ? 697.475 764.975  34.396  o  ?  ?  ?  ?
    9   5   2  60.731  57.808  ? 3688.27 3341.80 111.701  o  ?  ?  ?  ?
    9   5   3  40.565  39.671  ? 1645.50 1573.82  65.030  o  ?  ?  ?  ?
    9   5   4   7.338   7.594  ?  53.850  57.667  24.487  <  ?  ?  ?  ?
    9   5   5  19.512  20.919  ? 380.720 437.598  48.504  o  ?  ?  ?  ?
    9   5   6  42.860  42.896  ? 1836.94 1840.03 122.271  o  ?  ?  ?  ?
    9   5   7  26.432  26.698  ? 698.627 712.777  68.019  o  ?  ?  ?  ?
    9   5   8  26.959  28.847  ? 726.798 832.155  73.151  o  ?  ?  ?  ?
    9   5   9   3.238   3.149  ?  10.485   9.917  39.595  <  ?  ?  ?  ?
    9   5  10  22.130  22.567  ? 489.733 509.253  67.015  o  ?  ?  ?  ?
    9   5  11  24.487  24.236  ? 599.629 587.363  74.200  o  ?  ?  ?  ?
    9   5  12  25.882  28.011  ? 669.887 784.616 106.595  o  ?  ?  ?  ?
    9   5  13   5.702   6.419  ?  32.517  41.206  66.019  <  ?  ?  ?  ?
    9   5  14   6.265  10.513  ?  39.252 110.531  77.391  <  ?  ?  ?  ?
    9   5  15  11.674  15.068  ? 136.280 227.035 161.470  <  ?  ?  ?  ?
    9   6 -16   7.721   2.035  ?  59.614   4.139  74.200  <  ?  ?  ?  ?
    9   6 -15   6.951   7.524  ?  48.316  56.612  66.019  <  ?  ?  ?  ?
    9   6 -14  23.374  24.485  ? 546.329 599.522 102.845  o  ?  ?  ?  ?
    9   6 -13   9.476  10.200  ?  89.797 104.050  60.197  <  ?  ?  ?  ?
    9   6 -12   4.077   7.432  ?  16.620  55.229  61.148  <  ?  ?  ?  ?
    9   6 -11   2.963   5.614  ?   8.777  31.519  39.595  <  ?  ?  ?  ?
    9   6 -10  29.338  31.734  ? 860.742 1007.04  65.030  o  ?  ?  ?  ?
    9   6  -9  22.842  24.678  ? 521.734 609.012  52.852  o  ?  ?  ?  ?
    9   6  -8  28.183  28.673  ? 794.254 822.115  63.074  o  ?  ?  ?  ?
    9   6  -7   1.786   2.683  ?   3.191   7.199  22.707  <  ?  ?  ?  ?
    9   6  -6  30.323  30.887  ? 919.501 954.023  48.504  o  ?  ?  ?  ?
    9   6  -5  29.677  28.843  ? 880.719 831.905  48.504  o  ?  ?  ?  ?
    9   6  -4  43.382  41.725  ? 1882.02 1740.97  77.391  o  ?  ?  ?  ?
    9   6  -3  11.327   9.877  ? 128.312  97.558  21.557  o  ?  ?  ?  ?
    9   6  -2  17.267  16.490  ? 298.160 271.924  23.293  o  ?  ?  ?  ?
    9   6  -1  27.125  28.666  ? 735.782 821.716  38.830  o  ?  ?  ?  ?
    9   6   0  52.914  51.134  ? 2799.84 2614.69  94.354  o  ?  ?  ?  ?
    9   6   1  23.673  25.669  ? 560.403 658.874  33.683  o  ?  ?  ?  ?
    9   6   2   4.733   4.486  ?  22.401  20.126  19.348  <  ?  ?  ?  ?
    9   6   3  22.776  24.523  ? 518.754 601.391  53.744  o  ?  ?  ?  ?
    9   6   4  52.452  52.234  ? 2751.18 2728.42 169.326  o  ?  ?  ?  ?
    9   6   5  18.865  20.881  ? 355.888 435.998  53.744  o  ?  ?  ?  ?
    9   6   6  18.577  19.957  ? 345.120 398.272  53.744  o  ?  ?  ?  ?
    9   6   7   4.972   1.026  ?  24.723   1.053  39.595  <  ?  ?  ?  ?
    9   6   8  30.306  33.430  ? 918.474 1117.57  91.995  o  ?  ?  ?  ?
    9   6   9  15.141  18.277  ? 229.252 334.062  57.386  o  ?  ?  ?  ?
    9   6  10  25.794  27.201  ? 665.346 739.916  80.649  o  ?  ?  ?  ?
    9   6  11   6.747   6.814  ?  45.523  46.432  51.967  <  ?  ?  ?  ?
    9   6  12  11.505  14.120  ? 132.373 199.384  59.252  o  ?  ?  ?  ?
    9   6  13  14.656  17.272  ? 214.787 298.334  87.367  o  ?  ?  ?  ?
    9   6  14  25.599  24.608  ? 655.302 605.541 365.640  o  ?  ?  ?  ?
    9   7 -14   9.061   4.602  ?  82.110  21.182  83.975  <  ?  ?  ?  ?
    9   7 -13   6.722   3.030  ?  45.183   9.179  67.015  <  ?  ?  ?  ?
    9   7 -12  26.985  27.186  ? 728.178 739.088 122.271  o  ?  ?  ?  ?
    9   7 -11  10.963   9.343  ? 120.196  87.297  65.030  o  ?  ?  ?  ?
    9   7 -10  22.904  22.285  ? 524.597 496.628  79.556  o  ?  ?  ?  ?
    9   7  -9   3.082   1.554  ?   9.497   2.414  51.090  <  ?  ?  ?  ?
    9   7  -8  32.887  34.732  ? 1081.57 1206.31  83.975  o  ?  ?  ?  ?
    9   7  -7  12.716  14.519  ? 161.700 210.812  41.935  o  ?  ?  ?  ?
    9   7  -6  35.711  35.453  ? 1275.24 1256.90  96.742  o  ?  ?  ?  ?
    9   7  -5   5.325   6.040  ?  28.358  36.477  28.902  <  ?  ?  ?  ?
    9   7  -4  20.804  21.102  ? 432.803 445.289  37.322  o  ?  ?  ?  ?
    9   7  -3  12.066  12.607  ? 145.591 158.930  22.707  o  ?  ?  ?  ?
    9   7  -2  48.839  47.817  ? 2385.28 2286.43  90.827  o  ?  ?  ?  ?
    9   7  -1   7.414   8.139  ?  54.968  66.240  22.707  <  ?  ?  ?  ?
    9   7   0   6.612   6.340  ?  43.725  40.196  20.994  <  ?  ?  ?  ?
    9   7   1   6.857  10.082  ?  47.014 101.638  26.965  <  ?  ?  ?  ?
    9   7   2  49.570  50.565  ? 2457.18 2556.81 166.161  o  ?  ?  ?  ?
    9   7   3  17.031  16.944  ? 290.043 287.105  54.643  o  ?  ?  ?  ?
    9   7   4  11.409  13.469  ? 130.175 181.416  45.984  o  ?  ?  ?  ?
    9   7   5   9.814   9.217  ?  96.321  84.957  41.148  o  ?  ?  ?  ?
    9   7   6  34.971  35.825  ? 1223.00 1283.46 102.845  o  ?  ?  ?  ?
    9   7   7  10.635  12.044  ? 113.101 145.069  52.852  o  ?  ?  ?  ?
    9   7   8  21.240  21.952  ? 451.124 481.889  71.076  o  ?  ?  ?  ?
    9   7   9   4.761   4.727  ?  22.666  22.343  54.643  <  ?  ?  ?  ?
    9   7  10  16.034  16.243  ? 257.101 263.841  68.019  o  ?  ?  ?  ?
    9   7  11  10.085  10.337  ? 101.701 106.856  62.108  o  ?  ?  ?  ?
    9   7  12  24.535  26.239  ? 601.961 688.473 119.583  o  ?  ?  ?  ?
    9   7  13    .146   2.649  ?    .021   7.019 272.078  <  ?  ?  ?  ?
    9   8 -12  11.842  10.081  ? 140.244 101.624 111.701  o  ?  ?  ?  ?
    9   8 -11   7.503    .554  ?  56.299    .307  99.161  <  ?  ?  ?  ?
    9   8 -10  30.204  29.772  ? 912.274 886.400 149.288  o  ?  ?  ?  ?
    9   8  -9   5.476   7.109  ?  29.991  50.541  59.252  <  ?  ?  ?  ?
    9   8  -8  27.369  28.261  ? 749.077 798.709  78.470  o  ?  ?  ?  ?
    9   8  -7   8.423   3.685  ?  70.940  13.582  41.935  <  ?  ?  ?  ?
    9   8  -6  26.482  26.137  ? 701.308 683.158  75.256  o  ?  ?  ?  ?
    9   8  -5    .239   1.728  ?    .057   2.987  38.072  <  ?  ?  ?  ?
    9   8  -4  36.590  35.292  ? 1338.84 1245.54 109.133  o  ?  ?  ?  ?
    9   8  -3   3.053   2.818  ?   9.324   7.939  38.072  <  ?  ?  ?  ?
    9   8  -2  12.041  12.351  ? 144.979 152.554  32.978  o  ?  ?  ?  ?
    9   8  -1   3.093   3.123  ?   9.568   9.750  28.902  <  ?  ?  ?  ?
    9   8   0  38.890  38.957  ? 1512.46 1517.62 102.845  o  ?  ?  ?  ?
    9   8   1    .146   1.832  ?    .021   3.355  34.396  <  ?  ?  ?  ?
    9   8   2   5.484   3.148  ?  30.069   9.910  41.935  <  ?  ?  ?  ?
    9   8   3   4.633   3.480  ?  21.465  12.110  48.504  <  ?  ?  ?  ?
    9   8   4  34.494  37.281  ? 1189.87 1389.89 106.595  o  ?  ?  ?  ?
    9   8   5   5.022   4.539  ?  25.221  20.602  45.984  <  ?  ?  ?  ?
    9   8   6  16.607  17.763  ? 275.784 315.516  62.108  o  ?  ?  ?  ?
    9   8   7   -.033    .047  ?    .001    .002  51.967  <  ?  ?  ?  ?
    9   8   8  23.849  22.017  ? 568.787 484.761  85.098  o  ?  ?  ?  ?
    9   8   9   4.985   3.416  ?  24.846  11.670  66.019  <  ?  ?  ?  ?
    9   8  10  19.312  21.025  ? 372.965 442.046 152.289  o  ?  ?  ?  ?
    9   9  -8  21.335  22.193  ? 455.188 492.509  76.320  o  ?  ?  ?  ?
    9   9  -7    .044    .954  ?    .002    .910  50.221  <  ?  ?  ?  ?
    9   9  -6  25.772  26.449  ? 664.181 699.528 115.609  o  ?  ?  ?  ?
    9   9  -5   1.507   3.860  ?   2.272  14.898  46.817  <  ?  ?  ?  ?
    9   9  -4  12.850  13.534  ? 165.123 183.163  57.386  o  ?  ?  ?  ?
    9   9  -3    .019   3.086  ?    .000   9.522  51.090  <  ?  ?  ?  ?
    9   9  -2  29.879  29.221  ? 892.778 853.887  95.544  o  ?  ?  ?  ?
    9   9  -1    .060   4.416  ?    .004  19.501  54.643  <  ?  ?  ?  ?
    9   9   0    .115    .526  ?    .013    .276  43.532  <  ?  ?  ?  ?
    9   9   1   4.540   4.006  ?  20.612  16.049  54.643  <  ?  ?  ?  ?
    9   9   2  37.853  36.454  ? 1432.84 1328.88 140.465  o  ?  ?  ?  ?
    9   9   3   4.834    .455  ?  23.365    .207  54.643  <  ?  ?  ?  ?
    9   9   4   6.625   9.247  ?  43.894  85.508  56.464  <  ?  ?  ?  ?
    9   9   5   5.872    .905  ?  34.476    .818  59.252  <  ?  ?  ?  ?
    9   9   6  23.455  26.127  ? 550.147 682.594  89.666  o  ?  ?  ?  ?
    9   9   7    .076    .369  ?    .006    .136 123.625  <  ?  ?  ?  ?
    9  10  -6  16.338  13.904  ? 266.933 193.315 413.860  o  ?  ?  ?  ?
    9  10  -5   2.650   6.345  ?   7.021  40.259 358.665  <  ?  ?  ?  ?
    9  10  -4  24.014  24.314  ? 576.693 591.167 240.787  o  ?  ?  ?  ?
    9  10  -3   4.240   2.184  ?  17.977   4.772 195.720  <  ?  ?  ?  ?
    9  10  -2    .337   6.840  ?    .113  46.789 192.317  <  ?  ?  ?  ?
    9  10  -1   6.358   6.783  ?  40.430  46.011 276.123  <  ?  ?  ?  ?
    9  10   2   5.712   3.159  ?  32.625   9.982 403.977  <  ?  ?  ?  ?
    9  10   3   5.769   1.116  ?  33.287   1.244 399.081  <  ?  ?  ?  ?
    9  10   4  15.090  24.492  ? 227.697 599.849 538.930  <  ?  ?  ?  ?
   10   0 -16   6.214    .247  ?  38.620    .061  87.367  <  ?  ?  ?  ?
   10   0 -14  42.845  44.026  ? 1835.72 1938.31 238.895  o  ?  ?  ?  ?
   10   0 -12  16.565  15.259  ? 274.405 232.832  86.229  o  ?  ?  ?  ?
   10   0 -10  51.149  49.689  ? 2616.21 2469.01 286.368  o  ?  ?  ?  ?
   10   0  -8  30.736  32.474  ? 944.689 1054.58 144.843  o  ?  ?  ?  ?
   10   0  -6  45.700  41.935  ? 2088.53 1758.55 238.895  o  ?  ?  ?  ?
   10   0  -4  70.759  66.383  ? 5006.83 4406.74 759.134  o  ?  ?  ?  ?
   10   0  -2  22.983  21.982  ? 528.198 483.223 111.701  o  ?  ?  ?  ?
   10   0   0  83.738  74.312  ? 7012.08 5522.25 693.298  o  ?  ?  ?  ?
   10   0   2  22.801  21.477  ? 519.864 461.266 124.988  o  ?  ?  ?  ?
   10   0   4  71.388  62.255  ? 5096.25 3875.69 446.804  o  ?  ?  ?  ?
   10   0   6  35.194  35.109  ? 1238.65 1232.64 114.299  o  ?  ?  ?  ?
   10   0   8  55.301  50.727  ? 3058.22 2573.20 1204.10  o  ?  ?  ?  ?
   10   0  10  38.970  37.874  ? 1518.64 1434.42 192.317  o  ?  ?  ?  ?
   10   0  12  18.132  21.260  ? 328.756 451.969 114.299  o  ?  ?  ?  ?
   10   0  14  24.846  26.955  ? 617.338 726.588 202.618  o  ?  ?  ?  ?
   10   0  16    .102   1.188  ?    .010   1.411 115.609  <  ?  ?  ?  ?
   10   1 -17   6.756   6.745  ?  45.637  45.498  93.171  <  ?  ?  ?  ?
   10   1 -16  31.044  31.305  ? 963.706 980.015 114.299  o  ?  ?  ?  ?
   10   1 -15    .993   5.269  ?    .986  27.762  43.532  <  ?  ?  ?  ?
   10   1 -14   6.423   3.064  ?  41.252   9.389  41.935  <  ?  ?  ?  ?
   10   1 -13   5.244   9.389  ?  27.500  88.156  39.595  <  ?  ?  ?  ?
   10   1 -12  45.530  44.935  ? 2072.95 2019.19 143.376  o  ?  ?  ?  ?
   10   1 -11   7.470   6.761  ?  55.804  45.712  32.280  <  ?  ?  ?  ?
   10   1 -10  28.901  27.650  ? 835.273 764.546  68.019  o  ?  ?  ?  ?
   10   1  -9   2.717   4.508  ?   7.383  20.324  32.978  <  ?  ?  ?  ?
   10   1  -8  51.344  48.089  ? 2636.24 2312.59 143.376  o  ?  ?  ?  ?
   10   1  -7    .444   6.356  ?    .197  40.396  29.563  <  ?  ?  ?  ?
   10   1  -6  52.599  47.630  ? 2766.64 2268.59 152.289  o  ?  ?  ?  ?
   10   1  -5    .324   1.379  ?    .105   1.903  32.280  <  ?  ?  ?  ?
   10   1  -4  33.519  34.459  ? 1123.51 1187.42  78.470  o  ?  ?  ?  ?
   10   1  -3  10.381  11.124  ? 107.770 123.740  38.072  o  ?  ?  ?  ?
   10   1  -2  77.776  73.186  ? 6049.17 5356.13 292.605  o  ?  ?  ?  ?
   10   1  -1    .268   3.791  ?    .072  14.372  22.707  <  ?  ?  ?  ?
   10   1   0    .239   6.549  ?    .057  42.888  23.293  <  ?  ?  ?  ?
   10   1   1   3.198   6.460  ?  10.229  41.733  25.095  <  ?  ?  ?  ?
   10   1   2  72.084  66.483  ? 5196.11 4419.98 199.154  o  ?  ?  ?  ?
   10   1   3   9.335  11.545  ?  87.150 133.280  28.249  o  ?  ?  ?  ?
   10   1   4  29.132  28.575  ? 848.662 816.529  56.464  o  ?  ?  ?  ?
   10   1   5   1.823   1.333  ?   3.324   1.776  26.334  <  ?  ?  ?  ?
   10   1   6  65.958  59.862  ? 4350.47 3583.47 238.895  o  ?  ?  ?  ?
   10   1   7  16.651  16.159  ? 277.263 261.112  47.656  o  ?  ?  ?  ?
   10   1   8  36.660  35.303  ? 1343.97 1246.27  79.556  o  ?  ?  ?  ?
   10   1   9   -.019    .644  ?    .000    .414  39.595  <  ?  ?  ?  ?
   10   1  10  37.308  35.872  ? 1391.85 1286.79 101.609  o  ?  ?  ?  ?
   10   1  11   6.167   9.700  ?  38.030  94.097  44.342  <  ?  ?  ?  ?
   10   1  12  33.419  35.854  ? 1116.84 1285.50 107.861  o  ?  ?  ?  ?
   10   1  13    .129   1.412  ?    .017   1.995  41.935  <  ?  ?  ?  ?
   10   1  14   8.294   8.265  ?  68.798  68.308  58.316  <  ?  ?  ?  ?
   10   1  15   6.237   6.398  ?  38.899  40.933  68.019  <  ?  ?  ?  ?
   10   1  16  21.615  24.986  ? 467.214 624.322 106.595  o  ?  ?  ?  ?
   10   2 -18  24.140  22.555  ? 582.760 508.712 324.795  o  ?  ?  ?  ?
   10   2 -17   2.693   9.443  ?   7.253  89.170  65.030  <  ?  ?  ?  ?
   10   2 -16   5.501   1.207  ?  30.262   1.458  80.649  <  ?  ?  ?  ?
   10   2 -15  10.358  13.063  ? 107.279 170.650  54.643  o  ?  ?  ?  ?
   10   2 -14  37.820  36.155  ? 1430.35 1307.19 134.733  o  ?  ?  ?  ?
   10   2 -13  10.260  12.374  ? 105.264 153.104  44.342  o  ?  ?  ?  ?
   10   2 -12  10.279  11.915  ? 105.652 141.956  39.595  o  ?  ?  ?  ?
   10   2 -11   7.457   8.703  ?  55.610  75.750  32.978  <  ?  ?  ?  ?
   10   2 -10  43.588  40.997  ? 1899.90 1680.73 120.923  o  ?  ?  ?  ?
   10   2  -9  11.344  12.589  ? 128.677 158.491  39.595  o  ?  ?  ?  ?
   10   2  -8  32.606  28.981  ? 1063.17 839.875  75.256  o  ?  ?  ?  ?
   10   2  -7   5.744   4.275  ?  32.990  18.273  20.438  <  ?  ?  ?  ?
   10   2  -6  24.429  25.308  ? 596.759 640.479  37.322  o  ?  ?  ?  ?
   10   2  -5  12.356  17.971  ? 152.664 322.949  28.902  o  ?  ?  ?  ?
   10   2  -4  74.934  69.529  ? 5615.17 4834.29 284.304  o  ?  ?  ?  ?
   10   2  -3   5.399   5.334  ?  29.149  28.452  26.965  <  ?  ?  ?  ?
   10   2  -2  19.946  24.194  ? 397.835 585.365  36.579  o  ?  ?  ?  ?
   10   2  -1  12.798  16.380  ? 163.801 268.299  31.589  o  ?  ?  ?  ?
   10   2   0  71.890  68.823  ? 5168.19 4736.54 318.223  o  ?  ?  ?  ?
   10   2   1  10.445  10.310  ? 109.092 106.290  26.965  o  ?  ?  ?  ?
   10   2   2   4.011   5.651  ?  16.086  31.929  23.886  <  ?  ?  ?  ?
   10   2   3   5.200   7.452  ?  27.045  55.533  24.487  <  ?  ?  ?  ?
   10   2   4  47.081  44.680  ? 2216.63 1996.30 120.923  o  ?  ?  ?  ?
   10   2   5  25.324  24.794  ? 641.285 614.725  48.504  o  ?  ?  ?  ?
   10   2   6  29.120  26.260  ? 847.981 689.607  71.076  o  ?  ?  ?  ?
   10   2   7   2.995   4.138  ?   8.972  17.123  39.595  <  ?  ?  ?  ?
   10   2   8  43.455  42.875  ? 1888.37 1838.23 150.785  o  ?  ?  ?  ?
   10   2   9  18.591  18.733  ? 345.621 350.926  55.550  o  ?  ?  ?  ?
   10   2  10  39.143  36.078  ? 1532.15 1301.62 248.430  o  ?  ?  ?  ?
   10   2  11    .148    .702  ?    .022    .493  88.513  <  ?  ?  ?  ?
   10   2  12  15.104  17.004  ? 228.122 289.142 115.609  o  ?  ?  ?  ?
   10   2  13  12.507  12.630  ? 156.419 159.516 116.926  o  ?  ?  ?  ?
   10   2  14  28.477  29.379  ? 810.955 863.151 185.599  o  ?  ?  ?  ?
   10   2  15    .254   5.577  ?    .064  31.100  56.464  <  ?  ?  ?  ?
   10   2  16   3.589    .505  ?  12.880    .255 143.376  <  ?  ?  ?  ?
   10   3 -17  12.401  13.388  ? 153.778 179.252 131.911  o  ?  ?  ?  ?
   10   3 -16  24.073  24.949  ? 579.497 622.454 180.639  o  ?  ?  ?  ?
   10   3 -15   4.326   8.031  ?  18.714  64.504  58.316  <  ?  ?  ?  ?
   10   3 -14   2.575   5.239  ?   6.632  27.446  60.197  <  ?  ?  ?  ?
   10   3 -13   8.839  10.372  ?  78.126 107.586  48.504  <  ?  ?  ?  ?
   10   3 -12  30.121  30.104  ? 907.301 906.242 141.917  o  ?  ?  ?  ?
   10   3 -11  22.452  23.799  ? 504.104 566.380  58.316  o  ?  ?  ?  ?
   10   3 -10  22.114  23.795  ? 489.037 566.221  58.316  o  ?  ?  ?  ?
   10   3  -9   3.905   2.061  ?  15.247   4.247  38.072  <  ?  ?  ?  ?
   10   3  -8  36.469  36.882  ? 1329.97 1360.30  69.031  o  ?  ?  ?  ?
   10   3  -7  37.254  38.050  ? 1387.85 1447.83  86.229  o  ?  ?  ?  ?
   10   3  -6  35.703  34.549  ? 1274.72 1193.60  69.031  o  ?  ?  ?  ?
   10   3  -5   4.156   1.007  ?  17.275   1.015  23.293  <  ?  ?  ?  ?
   10   3  -4  17.408  18.594  ? 303.035 345.729  35.116  o  ?  ?  ?  ?
   10   3  -3  25.215  25.647  ? 635.773 657.777  45.984  o  ?  ?  ?  ?
   10   3  -2  64.413  60.466  ? 4149.01 3656.19 169.326  o  ?  ?  ?  ?
   10   3  -1  20.250  18.800  ? 410.082 353.431  39.595  o  ?  ?  ?  ?
   10   3   0  10.845  11.722  ? 117.619 137.402  30.906  o  ?  ?  ?  ?
   10   3   1   8.909  10.339  ?  79.361 106.892  28.249  o  ?  ?  ?  ?
   10   3   2  43.285  41.757  ? 1873.59 1743.61  86.229  o  ?  ?  ?  ?
   10   3   3  38.963  36.641  ? 1518.08 1342.56  81.750  o  ?  ?  ?  ?
   10   3   4  18.631  16.160  ? 347.119 261.151  40.367  o  ?  ?  ?  ?
   10   3   5  15.031  17.458  ? 225.932 304.774  46.817  o  ?  ?  ?  ?
   10   3   6  38.243  38.463  ? 1462.51 1479.42 111.701  o  ?  ?  ?  ?
   10   3   7  28.699  27.131  ? 823.618 736.101  74.200  o  ?  ?  ?  ?
   10   3   8  24.096  22.508  ? 580.610 506.616  95.544  o  ?  ?  ?  ?
   10   3   9    .011    .161  ?    .000    .026  52.852  <  ?  ?  ?  ?
   10   3  10  17.364  20.609  ? 301.492 424.744 116.926  o  ?  ?  ?  ?
   10   3  11  11.835  16.758  ? 140.076 280.841 114.299  o  ?  ?  ?  ?
   10   3  12  28.995  28.279  ? 840.685 799.721 213.187  o  ?  ?  ?  ?
   10   3  13    .273   8.147  ?    .074  66.366 104.087  <  ?  ?  ?  ?
   10   3  14   5.860   5.401  ?  34.343  29.175 119.583  <  ?  ?  ?  ?
   10   3  15  10.998  12.340  ? 120.967 152.274 470.351  <  ?  ?  ?  ?
   10   3  16  24.243  21.978  ? 587.704 483.030 677.305  o  ?  ?  ?  ?
   10   4 -16   3.562   5.320  ?  12.685  28.297 324.795  <  ?  ?  ?  ?
   10   4 -15  15.152  15.157  ? 229.576 229.750 131.911  o  ?  ?  ?  ?
   10   4 -14  22.428  20.511  ? 503.007 420.720 164.590  o  ?  ?  ?  ?
   10   4 -13  12.544  17.187  ? 157.357 295.386  82.859  o  ?  ?  ?  ?
   10   4 -12  13.326  11.317  ? 177.581 128.069 112.996  o  ?  ?  ?  ?
   10   4 -11   4.312   5.697  ?  18.592  32.457  89.666  <  ?  ?  ?  ?
   10   4 -10  33.967  33.465  ? 1153.75 1119.92  96.742  o  ?  ?  ?  ?
   10   4  -9  27.476  30.426  ? 754.951 925.748  97.948  o  ?  ?  ?  ?
   10   4  -8  27.019  26.159  ? 730.032 684.314  54.643  o  ?  ?  ?  ?
   10   4  -7  12.301  11.344  ? 151.317 128.679  32.280  o  ?  ?  ?  ?
   10   4  -6  31.247  31.860  ? 976.370 1015.09  62.108  o  ?  ?  ?  ?
   10   4  -5  50.060  47.648  ? 2505.97 2270.29 131.911  o  ?  ?  ?  ?
   10   4  -4  37.699  34.483  ? 1421.22 1189.06  80.649  o  ?  ?  ?  ?
   10   4  -3  19.454  18.088  ? 378.449 327.158  27.603  o  ?  ?  ?  ?
   10   4  -2  10.479  12.234  ? 109.801 149.675  18.814  o  ?  ?  ?  ?
   10   4  -1  38.390  37.872  ? 1473.77 1434.31  54.643  o  ?  ?  ?  ?
   10   4   0  45.950  46.537  ? 2111.45 2165.65  72.110  o  ?  ?  ?  ?
   10   4   1  34.138  34.492  ? 1165.41 1189.69  48.504  o  ?  ?  ?  ?
   10   4   2   7.153   8.506  ?  51.167  72.360  20.438  <  ?  ?  ?  ?
   10   4   3  26.467  26.145  ? 700.493 683.540  38.830  o  ?  ?  ?  ?
   10   4   4  44.459  45.589  ? 1976.65 2078.32  91.995  o  ?  ?  ?  ?
   10   4   5  33.161  29.952  ? 1099.66 897.098  67.015  o  ?  ?  ?  ?
   10   4   6  18.816  16.405  ? 354.043 269.135  43.532  o  ?  ?  ?  ?
   10   4   7   2.532   2.799  ?   6.413   7.835  38.072  <  ?  ?  ?  ?
   10   4   8  22.624  21.923  ? 511.832 480.621  65.030  o  ?  ?  ?  ?
   10   4   9  23.542  24.472  ? 554.237 598.887  68.019  o  ?  ?  ?  ?
   10   4  10  20.345  21.428  ? 413.917 459.162  66.019  o  ?  ?  ?  ?
   10   4  11    .177   8.025  ?    .031  64.397  59.252  <  ?  ?  ?  ?
   10   4  12   9.014   8.944  ?  81.255  80.003  76.320  <  ?  ?  ?  ?
   10   4  13  18.847  18.945  ? 355.224 358.915  97.948  o  ?  ?  ?  ?
   10   4  14  24.520  23.729  ? 601.233 563.054 127.735  o  ?  ?  ?  ?
   10   4  15  13.935   9.835  ? 194.198  96.720 274.097  <  ?  ?  ?  ?
   10   5 -14   4.151    .160  ?  17.231    .026 104.087  <  ?  ?  ?  ?
   10   5 -13  12.324  11.112  ? 151.893 123.466 114.299  o  ?  ?  ?  ?
   10   5 -12  21.955  20.289  ? 482.028 411.662 107.861  o  ?  ?  ?  ?
   10   5 -11  26.529  26.333  ? 703.785 693.431 119.583  o  ?  ?  ?  ?
   10   5 -10  11.928  10.640  ? 142.284 113.209  41.935  o  ?  ?  ?  ?
   10   5  -9   4.253    .371  ?  18.091    .138  40.367  <  ?  ?  ?  ?
   10   5  -8  28.750  28.282  ? 826.541 799.879  42.730  o  ?  ?  ?  ?
   10   5  -7  37.692  37.957  ? 1420.69 1440.76  62.108  o  ?  ?  ?  ?
   10   5  -6  24.328  24.472  ? 591.863 598.886  36.579  o  ?  ?  ?  ?
   10   5  -5  10.275   8.192  ? 105.571  67.116  21.557  o  ?  ?  ?  ?
   10   5  -4  16.927  15.818  ? 286.525 250.217  27.603  o  ?  ?  ?  ?
   10   5  -3  42.899  42.221  ? 1840.33 1782.60  73.151  o  ?  ?  ?  ?
   10   5  -2  33.975  34.793  ? 1154.33 1210.58  51.090  o  ?  ?  ?  ?
   10   5  -1  21.771  20.273  ? 473.989 410.989  32.280  o  ?  ?  ?  ?
   10   5   0   3.219   4.704  ?  10.362  22.125  20.438  <  ?  ?  ?  ?
   10   5   1  32.187  31.736  ? 1036.03 1007.16  48.504  o  ?  ?  ?  ?
   10   5   2  38.608  39.066  ? 1490.58 1526.18  62.108  o  ?  ?  ?  ?
   10   5   3  34.258  34.972  ? 1173.59 1223.03  65.030  o  ?  ?  ?  ?
   10   5   4   9.083   7.047  ?  82.495  49.662  30.231  o  ?  ?  ?  ?
   10   5   5  14.969  15.649  ? 224.084 244.893  50.221  o  ?  ?  ?  ?
   10   5   6  25.971  27.296  ? 674.471 745.060  71.076  o  ?  ?  ?  ?
   10   5   7  33.389  32.448  ? 1114.81 1052.87 101.609  o  ?  ?  ?  ?
   10   5   8  16.388  17.813  ? 268.565 317.287  55.550  o  ?  ?  ?  ?
   10   5   9   -.006   1.190  ?    .000   1.416  39.595  <  ?  ?  ?  ?
   10   5  10  12.688  12.020  ? 160.976 144.479  52.852  o  ?  ?  ?  ?
   10   5  11  24.687  26.091  ? 609.426 680.743  79.556  o  ?  ?  ?  ?
   10   5  12  19.481  19.496  ? 379.495 380.097  96.742  o  ?  ?  ?  ?
   10   5  13   6.777   5.608  ?  45.933  31.449  83.975  <  ?  ?  ?  ?
   10   5  14  11.863   6.228  ? 140.728  38.782 252.297  <  ?  ?  ?  ?
   10   6 -14  16.687  13.525  ? 278.470 182.920 129.119  o  ?  ?  ?  ?
   10   6 -13  21.658  20.781  ? 469.052 431.859 139.021  o  ?  ?  ?  ?
   10   6 -12    .170   3.849  ?    .029  14.818  62.108  <  ?  ?  ?  ?
   10   6 -11   8.848   9.699  ?  78.284  94.080  38.072  <  ?  ?  ?  ?
   10   6 -10  18.695  18.477  ? 349.489 341.383  52.852  o  ?  ?  ?  ?
   10   6  -9  34.758  34.716  ? 1208.13 1205.18  94.354  o  ?  ?  ?  ?
   10   6  -8   8.571   9.616  ?  73.460  92.473  30.231  o  ?  ?  ?  ?
   10   6  -7   5.477    .513  ?  29.994    .263  28.902  <  ?  ?  ?  ?
   10   6  -6  10.777  12.418  ? 116.153 154.196  24.487  o  ?  ?  ?  ?
   10   6  -5  37.791  37.246  ? 1428.13 1387.27  62.108  o  ?  ?  ?  ?
   10   6  -4  18.754  16.794  ? 351.727 282.043  30.906  o  ?  ?  ?  ?
   10   6  -3  13.955  13.196  ? 194.729 174.124  28.902  o  ?  ?  ?  ?
   10   6  -2    .302   2.227  ?    .091   4.961  21.557  <  ?  ?  ?  ?
   10   6  -1  32.470  32.052  ? 1054.29 1027.30  52.852  o  ?  ?  ?  ?
   10   6   0  21.956  19.888  ? 482.086 395.533  35.844  o  ?  ?  ?  ?
   10   6   1  30.688  30.539  ? 941.739 932.606  49.358  o  ?  ?  ?  ?
   10   6   2   5.975   5.395  ?  35.706  29.107  29.563  <  ?  ?  ?  ?
   10   6   3  24.717  26.794  ? 610.917 717.897  69.031  o  ?  ?  ?  ?
   10   6   4  23.571  24.932  ? 555.585 621.605  66.019  o  ?  ?  ?  ?
   10   6   5  37.478  37.421  ? 1404.62 1400.36 114.299  o  ?  ?  ?  ?
   10   6   6  10.786  11.318  ? 116.332 128.099  48.504  o  ?  ?  ?  ?
   10   6   7   7.069   9.001  ?  49.965  81.014  45.984  <  ?  ?  ?  ?
   10   6   8  12.594  13.877  ? 158.598 192.579  56.464  o  ?  ?  ?  ?
   10   6   9  29.423  28.746  ? 865.733 826.304  94.354  o  ?  ?  ?  ?
   10   6  10  11.597  12.884  ? 134.501 166.004  57.386  o  ?  ?  ?  ?
   10   6  11   5.302   6.407  ?  28.106  41.053  52.852  <  ?  ?  ?  ?
   10   6  12   8.541  11.446  ?  72.949 131.000 183.938  <  ?  ?  ?  ?
   10   7 -12   7.607   5.565  ?  57.871  30.969  94.354  <  ?  ?  ?  ?
   10   7 -11  28.475  26.861  ? 810.815 721.488 195.720  o  ?  ?  ?  ?
   10   7 -10   8.867   6.121  ?  78.615  37.468  64.048  <  ?  ?  ?  ?
   10   7  -9   9.754   6.695  ?  95.134  44.829  66.019  <  ?  ?  ?  ?
   10   7  -8   8.060   8.217  ?  64.964  67.526  45.984  <  ?  ?  ?  ?
   10   7  -7  37.311  38.953  ? 1392.14 1517.36 107.861  o  ?  ?  ?  ?
   10   7  -6   8.030   9.201  ?  64.475  84.657  36.579  <  ?  ?  ?  ?
   10   7  -5   3.672   4.607  ?  13.484  21.228  25.711  <  ?  ?  ?  ?
   10   7  -4    .266   1.632  ?    .071   2.663  23.293  <  ?  ?  ?  ?
   10   7  -3  31.801  31.276  ? 1011.32 978.183  51.967  o  ?  ?  ?  ?
   10   7  -2  11.593  12.249  ? 134.408 150.043  26.334  o  ?  ?  ?  ?
   10   7  -1  23.513  22.250  ? 552.839 495.072  38.072  o  ?  ?  ?  ?
   10   7   0    .079    .312  ?    .006    .098  23.886  <  ?  ?  ?  ?
   10   7   1  26.142  25.869  ? 683.380 669.227  65.030  o  ?  ?  ?  ?
   10   7   2  11.772  15.065  ? 138.590 226.954  52.852  o  ?  ?  ?  ?
   10   7   3  34.780  34.489  ? 1209.64 1189.46 101.609  o  ?  ?  ?  ?
   10   7   4   5.276   2.142  ?  27.831   4.590  46.817  <  ?  ?  ?  ?
   10   7   5   9.875  15.025  ?  97.522 225.737  51.090  o  ?  ?  ?  ?
   10   7   6   8.836   9.568  ?  78.068  91.541  51.967  <  ?  ?  ?  ?
   10   7   7  28.541  30.606  ? 814.598 936.751  93.171  o  ?  ?  ?  ?
   10   7   8    .265   4.522  ?    .070  20.446  56.464  <  ?  ?  ?  ?
   10   7   9    .012   1.320  ?    .000   1.741  51.967  <  ?  ?  ?  ?
   10   7  10    .223   2.841  ?    .050   8.071  94.354  <  ?  ?  ?  ?
   10   7  11  22.815  22.260  ? 520.528 495.526 324.795  o  ?  ?  ?  ?
   10   8 -10    .162   2.384  ?    .026   5.683  99.161  <  ?  ?  ?  ?
   10   8  -9  27.811  27.457  ? 773.439 753.908 159.921  o  ?  ?  ?  ?
   10   8  -8   2.058   4.458  ?   4.237  19.877  51.090  <  ?  ?  ?  ?
   10   8  -7   3.665   2.403  ?  13.430   5.773  44.342  <  ?  ?  ?  ?
   10   8  -6   4.748   5.301  ?  22.547  28.105  51.090  <  ?  ?  ?  ?
   10   8  -5  28.901  27.234  ? 835.295 741.686  70.050  o  ?  ?  ?  ?
   10   8  -4    .137   2.740  ?    .019   7.505  38.072  <  ?  ?  ?  ?
   10   8  -3  12.426  12.998  ? 154.399 168.949  41.935  o  ?  ?  ?  ?
   10   8  -2    .062   3.333  ?    .004  11.112  35.844  <  ?  ?  ?  ?
   10   8  -1  25.714  24.320  ? 661.207 591.439  72.110  o  ?  ?  ?  ?
   10   8   0    .176   3.522  ?    .031  12.406  41.148  <  ?  ?  ?  ?
   10   8   1  25.066  25.244  ? 628.288 637.246  80.649  o  ?  ?  ?  ?
   10   8   2   4.204    .880  ?  17.671    .774  54.643  <  ?  ?  ?  ?
   10   8   3  13.382  14.819  ? 179.076 219.603  56.464  o  ?  ?  ?  ?
   10   8   4    .170   5.734  ?    .029  32.880  51.967  <  ?  ?  ?  ?
   10   8   5  30.314  31.016  ? 918.912 961.969 106.595  o  ?  ?  ?  ?
   10   8   6   3.308   1.206  ?  10.943   1.454  56.464  <  ?  ?  ?  ?
   10   8   7   6.862   4.977  ?  47.081  24.769  79.556  <  ?  ?  ?  ?
   10   8   8   8.307   1.464  ?  69.007   2.142 233.263  <  ?  ?  ?  ?
   10   9  -8   -.010    .277  ?    .000    .077 356.354  <  ?  ?  ?  ?
   10   9  -7  23.334  24.514  ? 544.458 600.935 481.010  o  ?  ?  ?  ?
   10   9  -6   5.640   2.552  ?  31.804   6.513 354.052  <  ?  ?  ?  ?
   10   9  -5   6.150   7.701  ?  37.818  59.305  79.556  <  ?  ?  ?  ?
   10   9  -4   5.708   1.131  ?  32.585   1.280  57.386  <  ?  ?  ?  ?
   10   9  -3  27.646  25.030  ? 764.296 626.499 122.271  o  ?  ?  ?  ?
   10   9  -2   3.979   1.552  ?  15.836   2.407  66.019  <  ?  ?  ?  ?
   10   9  -1  17.502  16.604  ? 306.321 275.695  78.470  o  ?  ?  ?  ?
   10   9   0   4.176   2.049  ?  17.439   4.197  57.386  <  ?  ?  ?  ?
   10   9   1  20.916  22.362  ? 437.487 500.063 155.319  o  ?  ?  ?  ?
   10   9   2    .053   2.701  ?    .003   7.297 136.154  <  ?  ?  ?  ?
   10   9   3  21.853  22.994  ? 477.552 528.721 166.161  o  ?  ?  ?  ?
   10   9   4   4.042   1.132  ?  16.338   1.282 399.081  <  ?  ?  ?  ?
   11   0 -15  11.876  15.524  ? 141.042 240.987 120.923  o  ?  ?  ?  ?
   11   0 -13  32.547  30.263  ? 1059.30 915.826 199.154  o  ?  ?  ?  ?
   11   0 -11  13.115  12.051  ? 172.015 145.218 100.381  o  ?  ?  ?  ?
   11   0  -9  52.410  49.403  ? 2746.78 2440.66 349.468  o  ?  ?  ?  ?
   11   0  -7   5.287   2.179  ?  27.951   4.747  75.256  <  ?  ?  ?  ?
   11   0  -5  68.298  60.047  ? 4664.60 3605.66 530.454  o  ?  ?  ?  ?
   11   0  -3  31.700  26.784  ? 1004.88 717.371 183.938  o  ?  ?  ?  ?
   11   0  -1  62.991  57.764  ? 3967.91 3336.73 486.384  o  ?  ?  ?  ?
   11   0   1  41.582  37.974  ? 1729.06 1442.05 254.241  o  ?  ?  ?  ?
   11   0   3  30.085  30.573  ? 905.125 934.678 163.026  o  ?  ?  ?  ?
   11   0   5  50.851  45.728  ? 2585.80 2091.09 347.188  o  ?  ?  ?  ?
   11   0   7  13.209  12.488  ? 174.480 155.944 282.248  <  ?  ?  ?  ?
   11   0   9  45.229  44.588  ? 2045.68 1988.09 491.789  o  ?  ?  ?  ?
   11   0  11  10.588   8.311  ? 112.115  69.067 101.609  <  ?  ?  ?  ?
   11   0  13  22.211  23.895  ? 493.338 570.976 177.369  o  ?  ?  ?  ?
   11   0  15  15.705  15.571  ? 246.639 242.446 213.187  o  ?  ?  ?  ?
   11   1 -16    .210   6.686  ?    .044  44.699  71.076  <  ?  ?  ?  ?
   11   1 -15  16.745  18.730  ? 280.402 350.824  90.827  o  ?  ?  ?  ?
   11   1 -14   6.384   4.929  ?  40.752  24.296  49.358  <  ?  ?  ?  ?
   11   1 -13  22.747  19.610  ? 517.443 384.537  68.019  o  ?  ?  ?  ?
   11   1 -12    .289   3.399  ?    .083  11.553  42.730  <  ?  ?  ?  ?
   11   1 -11  36.246  35.196  ? 1313.79 1238.76 129.119  o  ?  ?  ?  ?
   11   1 -10    .925   5.374  ?    .855  28.877  41.148  <  ?  ?  ?  ?
   11   1  -9   3.998   4.916  ?  15.983  24.170  42.730  <  ?  ?  ?  ?
   11   1  -8   3.942   2.837  ?  15.541   8.046  40.367  <  ?  ?  ?  ?
   11   1  -7  55.363  50.134  ? 3065.03 2513.37 190.626  o  ?  ?  ?  ?
   11   1  -6   8.063   7.627  ?  65.019  58.170  40.367  <  ?  ?  ?  ?
   11   1  -5  11.857  10.954  ? 140.595 119.989  44.342  o  ?  ?  ?  ?
   11   1  -4   3.534   2.388  ?  12.492   5.701  43.532  <  ?  ?  ?  ?
   11   1  -3  60.570  56.192  ? 3668.76 3157.58 222.200  o  ?  ?  ?  ?
   11   1  -2  10.991  11.328  ? 120.803 128.329  48.504  o  ?  ?  ?  ?
   11   1  -1  36.863  35.489  ? 1358.87 1259.49 105.338  o  ?  ?  ?  ?
   11   1   0   1.816   2.581  ?   3.297   6.662  42.730  <  ?  ?  ?  ?
   11   1   1  46.573  44.099  ? 2169.08 1944.69 147.799  o  ?  ?  ?  ?
   11   1   2   5.487   8.249  ?  30.108  68.040  42.730  <  ?  ?  ?  ?
   11   1   3  43.407  41.431  ? 1884.19 1716.54 114.299  o  ?  ?  ?  ?
   11   1   4   3.592   1.083  ?  12.900   1.173  28.249  <  ?  ?  ?  ?
   11   1   5  19.934  20.575  ? 397.361 423.329  41.935  o  ?  ?  ?  ?
   11   1   6   4.689   7.941  ?  21.991  63.053  44.342  <  ?  ?  ?  ?
   11   1   7  50.346  47.078  ? 2534.71 2216.35 183.938  o  ?  ?  ?  ?
   11   1   8   1.112    .238  ?   1.237    .057  61.148  <  ?  ?  ?  ?
   11   1   9   5.564   3.096  ?  30.953   9.585  62.108  <  ?  ?  ?  ?
   11   1  10    .198   3.654  ?    .039  13.349  77.391  <  ?  ?  ?  ?
   11   1  11  31.979  33.920  ? 1022.66 1150.54 179.000  o  ?  ?  ?  ?
   11   1  12  11.146   5.849  ? 124.224  34.212 107.861  <  ?  ?  ?  ?
   11   1  13   9.846  10.227  ?  96.949 104.588 105.338  <  ?  ?  ?  ?
   11   1  14    .078   1.475  ?    .006   2.176 153.800  <  ?  ?  ?  ?
   11   2 -15  19.837  18.445  ? 393.512 340.201  90.827  o  ?  ?  ?  ?
   11   2 -14   6.472   9.363  ?  41.888  87.660  71.076  <  ?  ?  ?  ?
   11   2 -13  27.026  26.364  ? 730.389 695.070  86.229  o  ?  ?  ?  ?
   11   2 -12   5.402   4.603  ?  29.179  21.190  46.817  <  ?  ?  ?  ?
   11   2 -11  12.033  12.386  ? 144.784 153.420  46.817  o  ?  ?  ?  ?
   11   2 -10   5.386   8.641  ?  29.008  74.667  41.935  <  ?  ?  ?  ?
   11   2  -9  44.810  42.416  ? 2007.90 1799.14 152.289  o  ?  ?  ?  ?
   11   2  -8  16.705  16.980  ? 279.067 288.316  52.852  o  ?  ?  ?  ?
   11   2  -7   4.645   6.241  ?  21.580  38.955  42.730  <  ?  ?  ?  ?
   11   2  -6  11.032  11.878  ? 121.701 141.098  48.504  o  ?  ?  ?  ?
   11   2  -5  41.272  38.925  ? 1703.38 1515.17 137.584  o  ?  ?  ?  ?
   11   2  -4  22.360  20.416  ? 499.959 416.799  63.074  o  ?  ?  ?  ?
   11   2  -3  25.451  23.780  ? 647.736 565.507  69.031  o  ?  ?  ?  ?
   11   2  -2   4.962   9.859  ?  24.625  97.204  30.231  <  ?  ?  ?  ?
   11   2  -1  44.886  44.015  ? 2014.79 1937.31  99.161  o  ?  ?  ?  ?
   11   2   0  17.232  16.676  ? 296.945 278.091  37.322  o  ?  ?  ?  ?
   11   2   1  36.424  36.257  ? 1326.70 1314.56  76.320  o  ?  ?  ?  ?
   11   2   2    .111   4.901  ?    .012  24.021  30.231  <  ?  ?  ?  ?
   11   2   3  23.425  23.818  ? 548.734 567.278  47.656  o  ?  ?  ?  ?
   11   2   4  11.739  13.050  ? 137.793 170.310  35.844  o  ?  ?  ?  ?
   11   2   5  44.016  41.519  ? 1937.38 1723.83 114.299  o  ?  ?  ?  ?
   11   2   6  13.190  10.005  ? 173.982 100.097  45.160  o  ?  ?  ?  ?
   11   2   7   6.834   7.465  ?  46.697  55.729  46.817  <  ?  ?  ?  ?
   11   2   8   7.758  10.609  ?  60.182 112.552  45.984  <  ?  ?  ?  ?
   11   2   9  40.998  38.177  ? 1680.84 1457.50 202.618  o  ?  ?  ?  ?
   11   2  10   9.085   6.944  ?  82.533  48.217 102.845  <  ?  ?  ?  ?
   11   2  11    .259   6.147  ?    .067  37.781  93.171  <  ?  ?  ?  ?
   11   2  12    .242   1.777  ?    .059   3.157  99.161  <  ?  ?  ?  ?
   11   2  13  23.693  25.344  ? 561.359 642.301 153.800  o  ?  ?  ?  ?
   11   2  14  10.549  12.187  ? 111.276 148.516 122.271  <  ?  ?  ?  ?
   11   2  15  14.953  10.449  ? 223.588 109.180 544.618  <  ?  ?  ?  ?
   11   3 -14   -.093   2.565  ?    .009   6.580  60.197  <  ?  ?  ?  ?
   11   3 -13  12.953  14.743  ? 167.776 217.366  69.031  o  ?  ?  ?  ?
   11   3 -12  12.700  14.140  ? 161.284 199.940  68.019  o  ?  ?  ?  ?
   11   3 -11  31.535  28.852  ? 994.427 832.464 101.609  o  ?  ?  ?  ?
   11   3 -10  11.062  11.915  ? 122.371 141.969  52.852  o  ?  ?  ?  ?
   11   3  -9   8.459   7.171  ?  71.553  51.421  47.656  <  ?  ?  ?  ?
   11   3  -8  12.208  13.136  ? 149.040 172.566  49.358  o  ?  ?  ?  ?
   11   3  -7  40.016  38.025  ? 1601.27 1445.88 126.357  o  ?  ?  ?  ?
   11   3  -6  21.937  22.561  ? 481.217 509.012  47.656  o  ?  ?  ?  ?
   11   3  -5   4.061   8.263  ?  16.495  68.283  30.231  <  ?  ?  ?  ?
   11   3  -4  17.722  20.280  ? 314.056 411.269  38.072  o  ?  ?  ?  ?
   11   3  -3  34.635  34.762  ? 1199.56 1208.40  73.151  o  ?  ?  ?  ?
   11   3  -2  22.014  22.330  ? 484.627 498.617  46.817  o  ?  ?  ?  ?
   11   3  -1  28.522  25.083  ? 813.521 629.171  61.148  o  ?  ?  ?  ?
   11   3   0    .086    .266  ?    .007    .071  30.906  <  ?  ?  ?  ?
   11   3   1  24.231  25.465  ? 587.126 648.441  50.221  o  ?  ?  ?  ?
   11   3   2  28.201  29.745  ? 795.306 884.739  57.386  o  ?  ?  ?  ?
   11   3   3  33.210  30.897  ? 1102.89 954.601  72.110  o  ?  ?  ?  ?
   11   3   4  13.570  14.670  ? 184.155 215.199  41.935  o  ?  ?  ?  ?
   11   3   5   4.886   4.980  ?  23.870  24.803  46.817  <  ?  ?  ?  ?
   11   3   6  22.143  23.216  ? 490.303 538.980  64.048  o  ?  ?  ?  ?
   11   3   7  40.299  41.199  ? 1623.99 1697.39 149.288  o  ?  ?  ?  ?
   11   3   8   7.838   9.944  ?  61.435  98.876  65.030  <  ?  ?  ?  ?
   11   3   9   4.482   1.303  ?  20.090   1.699  63.074  <  ?  ?  ?  ?
   11   3  10   2.694   9.846  ?   7.257  96.949 114.299  <  ?  ?  ?  ?
   11   3  11  24.428  26.159  ? 596.703 684.315 163.026  o  ?  ?  ?  ?
   11   3  12  12.240  13.441  ? 149.811 180.661 143.376  <  ?  ?  ?  ?
   11   3  13   8.387   9.882  ?  70.346  97.656 127.735  <  ?  ?  ?  ?
   11   3  14   6.904   1.323  ?  47.672   1.751 475.665  <  ?  ?  ?  ?
   11   4 -13  15.161  16.567  ? 229.858 274.462  76.320  o  ?  ?  ?  ?
   11   4 -12   7.399   6.110  ?  54.745  37.327  68.019  <  ?  ?  ?  ?
   11   4 -11   9.964  11.536  ?  99.272 133.077  66.019  <  ?  ?  ?  ?
   11   4 -10  21.058  20.324  ? 443.452 413.080  70.050  o  ?  ?  ?  ?
   11   4  -9  30.196  28.755  ? 911.824 826.844 127.735  o  ?  ?  ?  ?
   11   4  -8  17.352  17.585  ? 301.102 309.245  42.730  o  ?  ?  ?  ?
   11   4  -7   3.029   6.153  ?   9.176  37.862  32.280  <  ?  ?  ?  ?
   11   4  -6  21.517  22.116  ? 462.974 489.109  47.656  o  ?  ?  ?  ?
   11   4  -5  28.879  27.568  ? 834.017 759.983  62.108  o  ?  ?  ?  ?
   11   4  -4  21.392  18.956  ? 457.621 359.339  45.160  o  ?  ?  ?  ?
   11   4  -3  15.841  17.965  ? 250.935 322.727  41.935  o  ?  ?  ?  ?
   11   4  -2   8.128   8.521  ?  66.060  72.612  35.844  <  ?  ?  ?  ?
   11   4  -1  29.027  28.901  ? 842.594 835.283  61.148  o  ?  ?  ?  ?
   11   4   0  29.266  29.037  ? 856.474 843.153  66.019  o  ?  ?  ?  ?
   11   4   1  27.763  26.099  ? 770.810 681.157  58.316  o  ?  ?  ?  ?
   11   4   2  10.023   8.490  ? 100.465  72.080  30.906  o  ?  ?  ?  ?
   11   4   3  20.030  21.063  ? 401.205 443.631  47.656  o  ?  ?  ?  ?
   11   4   4  34.932  36.692  ? 1220.28 1346.34 101.609  o  ?  ?  ?  ?
   11   4   5  32.598  30.396  ? 1062.64 923.895 100.381  o  ?  ?  ?  ?
   11   4   6  10.700   8.925  ? 114.495  79.663  64.048  o  ?  ?  ?  ?
   11   4   7   6.400   7.467  ?  40.964  55.754  68.019  <  ?  ?  ?  ?
   11   4   8  16.965  16.946  ? 287.808 287.154  86.229  o  ?  ?  ?  ?
   11   4   9  24.516  25.526  ? 601.014 651.594 105.338  o  ?  ?  ?  ?
   11   4  10  11.634  16.074  ? 135.353 258.360 137.584  <  ?  ?  ?  ?
   11   4  11    .190   4.968  ?    .036  24.677 131.911  <  ?  ?  ?  ?
   11   4  12   3.248   9.768  ?  10.552  95.407 133.318  <  ?  ?  ?  ?
   11   5 -12  23.045  20.533  ? 531.074 421.589 112.996  o  ?  ?  ?  ?
   11   5 -11  13.438  15.842  ? 180.587 250.973  61.148  o  ?  ?  ?  ?
   11   5 -10  13.808  13.692  ? 190.674 187.483  70.050  o  ?  ?  ?  ?
   11   5  -9   7.108   7.236  ?  50.530  52.365  60.197  <  ?  ?  ?  ?
   11   5  -8  19.707  19.615  ? 388.380 384.732  51.090  o  ?  ?  ?  ?
   11   5  -7  24.833  26.240  ? 616.666 688.525  59.252  o  ?  ?  ?  ?
   11   5  -6  29.104  27.790  ? 847.046 772.257  74.200  o  ?  ?  ?  ?
   11   5  -5   5.530   2.314  ?  30.580   5.353  34.396  <  ?  ?  ?  ?
   11   5  -4  19.750  19.206  ? 390.065 368.878  48.504  o  ?  ?  ?  ?
   11   5  -3  25.955  24.566  ? 673.683 603.479  60.197  o  ?  ?  ?  ?
   11   5  -2  30.511  26.779  ? 930.915 717.115  83.975  o  ?  ?  ?  ?
   11   5  -1  15.975  17.957  ? 255.213 322.467  43.532  o  ?  ?  ?  ?
   11   5   0   -.149    .095  ?    .022    .009  34.396  <  ?  ?  ?  ?
   11   5   1  26.038  24.607  ? 677.976 605.497  77.391  o  ?  ?  ?  ?
   11   5   2  33.508  32.218  ? 1122.80 1037.98  76.320  o  ?  ?  ?  ?
   11   5   3  22.202  21.553  ? 492.912 464.513  68.019  o  ?  ?  ?  ?
   11   5   4  12.816  11.626  ? 164.261 135.165  76.320  o  ?  ?  ?  ?
   11   5   5  12.667  11.904  ? 160.461 141.693  78.470  o  ?  ?  ?  ?
   11   5   6  27.148  27.708  ? 736.992 767.744 122.271  o  ?  ?  ?  ?
   11   5   7  18.876  20.451  ? 356.295 418.247  97.948  o  ?  ?  ?  ?
   11   5   8  15.509  14.669  ? 240.534 215.187  87.367  o  ?  ?  ?  ?
   11   5   9   -.002   1.053  ?    .000   1.110  68.019  <  ?  ?  ?  ?
   11   5  10  12.412  15.393  ? 154.057 236.930  90.827  o  ?  ?  ?  ?
   11   6 -11    .248   2.518  ?    .062   6.340 282.248  <  ?  ?  ?  ?
   11   6 -10  20.886  21.757  ? 436.240 473.388  99.161  o  ?  ?  ?  ?
   11   6  -9  15.740  14.577  ? 247.750 212.482  70.050  o  ?  ?  ?  ?
   11   6  -8  21.289  20.459  ? 453.203 418.555  58.316  o  ?  ?  ?  ?
   11   6  -7   6.807   3.655  ?  46.330  13.357  44.342  <  ?  ?  ?  ?
   11   6  -6  17.879  18.443  ? 319.671 340.149  51.967  o  ?  ?  ?  ?
   11   6  -5  21.918  20.267  ? 480.417 410.740  62.108  o  ?  ?  ?  ?
   11   6  -4  31.468  30.265  ? 990.218 915.942  79.556  o  ?  ?  ?  ?
   11   6  -3   8.091   8.631  ?  65.456  74.498  28.902  <  ?  ?  ?  ?
   11   6  -2  10.160   9.152  ? 103.221  83.766  28.902  o  ?  ?  ?  ?
   11   6  -1  17.850  17.734  ? 318.607 314.498  38.830  o  ?  ?  ?  ?
   11   6   0  37.540  36.492  ? 1409.29 1331.67  73.151  o  ?  ?  ?  ?
   11   6   1  11.864  12.783  ? 140.746 163.406  40.367  o  ?  ?  ?  ?
   11   6   2    .139   3.940  ?    .019  15.525  41.935  <  ?  ?  ?  ?
   11   6   3   9.832  12.583  ?  96.662 158.322  48.504  o  ?  ?  ?  ?
   11   6   4  30.124  31.535  ? 907.470 994.427  95.544  o  ?  ?  ?  ?
   11   6   5  15.587  14.649  ? 242.966 214.593  61.148  o  ?  ?  ?  ?
   11   6   6  12.430  11.682  ? 154.494 136.463  56.464  o  ?  ?  ?  ?
   11   6   7   4.091   1.468  ?  16.739   2.154  59.252  <  ?  ?  ?  ?
   11   6   8  14.315  18.251  ? 204.913 333.097  64.048  o  ?  ?  ?  ?
   11   6   9  10.455  10.776  ? 109.311 116.116  71.076  o  ?  ?  ?  ?
   11   6  10  16.557  16.322  ? 274.135 266.417 109.133  o  ?  ?  ?  ?
   11   6  11    .089   2.892  ?    .008   8.366 104.087  <  ?  ?  ?  ?
   11   7 -10   8.395  10.995  ?  70.471 120.894 333.663  <  ?  ?  ?  ?
   11   7  -9   -.104    .841  ?    .011    .707  86.229  <  ?  ?  ?  ?
   11   7  -8  19.986  20.669  ? 399.459 427.208  46.817  o  ?  ?  ?  ?
   11   7  -7  11.598  11.580  ? 134.522 134.104  36.579  o  ?  ?  ?  ?
   11   7  -6  22.067  21.868  ? 486.967 478.230  47.656  o  ?  ?  ?  ?
   11   7  -5    .050   3.027  ?    .003   9.163  30.231  <  ?  ?  ?  ?
   11   7  -4  12.706  12.642  ? 161.438 159.827  34.396  o  ?  ?  ?  ?
   11   7  -3   9.072   8.985  ?  82.301  80.730  29.563  o  ?  ?  ?  ?
   11   7  -2  31.951  30.837  ? 1020.89 950.951  62.108  o  ?  ?  ?  ?
   11   7  -1   3.181   4.447  ?  10.116  19.774  30.906  <  ?  ?  ?  ?
   11   7   0   4.204   4.998  ?  17.675  24.976  47.656  <  ?  ?  ?  ?
   11   7   1   7.116   9.797  ?  50.640  95.973  49.358  <  ?  ?  ?  ?
   11   7   2  29.439  29.912  ? 866.644 894.724  94.354  o  ?  ?  ?  ?
   11   7   3    .344   5.528  ?    .118  30.558  51.090  <  ?  ?  ?  ?
   11   7   4   6.308  10.165  ?  39.786 103.328  52.852  <  ?  ?  ?  ?
   11   7   5   3.250   3.904  ?  10.562  15.238  48.504  <  ?  ?  ?  ?
   11   7   6  20.051  23.446  ? 402.028 549.723  73.151  o  ?  ?  ?  ?
   11   7   7   8.028   6.014  ?  64.442  36.172  97.948  <  ?  ?  ?  ?
   11   7   8  14.004  14.844  ? 196.108 220.342 262.094  <  ?  ?  ?  ?
   11   8  -7    .012   1.910  ?    .000   3.648 107.861  <  ?  ?  ?  ?
   11   8  -6  13.495  14.884  ? 182.114 221.541  82.859  o  ?  ?  ?  ?
   11   8  -5    .154   2.869  ?    .024   8.233  68.019  <  ?  ?  ?  ?
   11   8  -4  23.918  22.618  ? 572.070 511.552  67.015  o  ?  ?  ?  ?
   11   8  -3   -.055    .306  ?    .003    .093  44.342  <  ?  ?  ?  ?
   11   8  -2   8.334   6.128  ?  69.448  37.557  55.550  <  ?  ?  ?  ?
   11   8  -1    .155   1.408  ?    .024   1.983  51.967  <  ?  ?  ?  ?
   11   8   0  27.802  27.594  ? 772.966 761.453 101.609  o  ?  ?  ?  ?
   11   8   1   -.106    .236  ?    .011    .056  75.256  <  ?  ?  ?  ?
   11   8   2   5.223   2.282  ?  27.276   5.208 116.926  <  ?  ?  ?  ?
   11   8   3   -.107   1.272  ?    .012   1.617 118.251  <  ?  ?  ?  ?
   11   8   4  24.253  25.112  ? 588.185 630.609 262.094  o  ?  ?  ?  ?
   11   8   5   4.395   6.232  ?  19.312  38.838 183.938  <  ?  ?  ?  ?
   12   0 -14  25.864  23.930  ? 668.936 572.634 349.468  o  ?  ?  ?  ?
   12   0 -12  14.078  10.694  ? 198.193 114.371 143.376  o  ?  ?  ?  ?
   12   0 -10  36.822  33.535  ? 1355.88 1124.57 254.241  o  ?  ?  ?  ?
   12   0  -8  27.536  25.934  ? 758.216 672.553 169.326  o  ?  ?  ?  ?
   12   0  -6  35.064  34.956  ? 1229.49 1221.92 227.698  o  ?  ?  ?  ?
   12   0  -4  31.732  28.829  ? 1006.94 831.084 187.267  o  ?  ?  ?  ?
   12   0  -2  11.658  10.233  ? 135.904 104.723 106.595  o  ?  ?  ?  ?
   12   0   0  50.580  47.675  ? 2558.36 2272.88 367.980  o  ?  ?  ?  ?
   12   0   2   2.887   5.777  ?   8.333  33.375  95.544  <  ?  ?  ?  ?
   12   0   4  47.916  45.138  ? 2295.93 2037.48 311.717  o  ?  ?  ?  ?
   12   0   6  16.017  15.854  ? 256.546 251.364 107.861  o  ?  ?  ?  ?
   12   0   8  31.011  27.471  ? 961.671 754.652 510.938  o  ?  ?  ?  ?
   12   0  10  27.510  24.386  ? 756.774 594.687 459.811  o  ?  ?  ?  ?
   12   1 -14   6.993   4.791  ?  48.908  22.951 150.785  <  ?  ?  ?  ?
   12   1 -13    .096   4.830  ?    .009  23.327  62.108  <  ?  ?  ?  ?
   12   1 -12  32.762  29.991  ? 1073.38 899.489 118.251  o  ?  ?  ?  ?
   12   1 -11   4.316   5.303  ?  18.628  28.117  56.464  <  ?  ?  ?  ?
   12   1 -10  17.761  16.234  ? 315.466 263.535  67.015  o  ?  ?  ?  ?
   12   1  -9   4.625    .105  ?  21.392    .011  51.090  <  ?  ?  ?  ?
   12   1  -8  32.068  30.498  ? 1028.36 930.137 104.087  o  ?  ?  ?  ?
   12   1  -7   6.319   7.064  ?  39.926  49.894  48.504  <  ?  ?  ?  ?
   12   1  -6  30.551  27.308  ? 933.374 745.719  97.948  o  ?  ?  ?  ?
   12   1  -5    .097    .726  ?    .009    .528  45.160  <  ?  ?  ?  ?
   12   1  -4  20.608  19.004  ? 424.689 361.137  69.031  o  ?  ?  ?  ?
   12   1  -3   5.635   7.121  ?  31.755  50.710  51.090  <  ?  ?  ?  ?
   12   1  -2  44.083  41.346  ? 1943.27 1709.49 147.799  o  ?  ?  ?  ?
   12   1  -1   2.815   2.189  ?   7.922   4.793  50.221  <  ?  ?  ?  ?
   12   1   0   3.876   3.662  ?  15.027  13.412  43.532  <  ?  ?  ?  ?
   12   1   1    .258   1.255  ?    .067   1.574  45.984  <  ?  ?  ?  ?
   12   1   2  47.860  44.651  ? 2290.54 1993.71 216.770  o  ?  ?  ?  ?
   12   1   3   2.789   7.551  ?   7.776  57.021  47.656  <  ?  ?  ?  ?
   12   1   4   8.330   6.751  ?  69.385  45.577  44.342  <  ?  ?  ?  ?
   12   1   5   7.079   5.339  ?  50.116  28.502  46.817  <  ?  ?  ?  ?
   12   1   6  33.028  30.709  ? 1090.84 943.027 136.154  o  ?  ?  ?  ?
   12   1   7  11.279   9.221  ? 127.221  85.034 129.119  <  ?  ?  ?  ?
   12   1   8  25.253  23.276  ? 637.705 541.778 185.599  o  ?  ?  ?  ?
   12   1   9   -.002   1.603  ?    .000   2.568 146.317  <  ?  ?  ?  ?
   12   1  10  19.506  19.719  ? 380.483 388.858 195.720  o  ?  ?  ?  ?
   12   1  11   3.939   4.304  ?  15.514  18.522 105.338  <  ?  ?  ?  ?
   12   1  12  21.564  21.087  ? 465.013 444.650 141.917  o  ?  ?  ?  ?
   12   1  13   5.493   1.642  ?  30.178   2.696 118.251  <  ?  ?  ?  ?
   12   2 -13   3.828   5.138  ?  14.650  26.401 158.380  <  ?  ?  ?  ?
   12   2 -12   9.013   7.222  ?  81.240  52.160  61.148  <  ?  ?  ?  ?
   12   2 -11   6.020   3.510  ?  36.243  12.319  57.386  <  ?  ?  ?  ?
   12   2 -10  26.195  24.516  ? 686.156 601.049  90.827  o  ?  ?  ?  ?
   12   2  -9  12.991  14.458  ? 168.776 209.030  65.030  o  ?  ?  ?  ?
   12   2  -8  27.709  25.108  ? 767.783 630.393  96.742  o  ?  ?  ?  ?
   12   2  -7   -.040    .213  ?    .002    .045  51.090  <  ?  ?  ?  ?
   12   2  -6  25.029  23.698  ? 626.436 561.590  83.975  o  ?  ?  ?  ?
   12   2  -5  15.154  15.240  ? 229.634 232.248  60.197  o  ?  ?  ?  ?
   12   2  -4  37.337  34.311  ? 1394.07 1177.27 124.988  o  ?  ?  ?  ?
   12   2  -3   6.590   1.222  ?  43.428   1.494  47.656  <  ?  ?  ?  ?
   12   2  -2   8.005   9.004  ?  64.082  81.070  46.817  <  ?  ?  ?  ?
   12   2  -1  10.411   8.731  ? 108.395  76.235  51.090  o  ?  ?  ?  ?
   12   2   0  42.870  39.668  ? 1837.84 1573.56 141.917  o  ?  ?  ?  ?
   12   2   1  15.359  14.277  ? 235.908 203.843  53.744  o  ?  ?  ?  ?
   12   2   2   3.668    .703  ?  13.455    .494  52.852  <  ?  ?  ?  ?
   12   2   3   2.273   2.450  ?   5.169   6.001  43.532  <  ?  ?  ?  ?
   12   2   4  29.935  28.711  ? 896.124 824.334  70.050  o  ?  ?  ?  ?
   12   2   5  19.338  20.199  ? 373.967 408.005  61.148  o  ?  ?  ?  ?
   12   2   6  19.575  19.589  ? 383.197 383.731  62.108  o  ?  ?  ?  ?
   12   2   7   5.578   4.747  ?  31.117  22.534  48.504  <  ?  ?  ?  ?
   12   2   8  24.131  26.223  ? 582.293 687.653 106.595  o  ?  ?  ?  ?
   12   2   9  13.272  10.437  ? 176.137 108.932 133.318  o  ?  ?  ?  ?
   12   2  10  22.036  19.069  ? 485.606 363.621 158.380  o  ?  ?  ?  ?
   12   2  11   6.326   2.679  ?  40.023   7.177 119.583  <  ?  ?  ?  ?
   12   2  12   2.411  10.118  ?   5.813 102.367 112.996  <  ?  ?  ?  ?
   12   3 -13   6.649   6.881  ?  44.205  47.353 354.052  <  ?  ?  ?  ?
   12   3 -12  24.291  20.539  ? 590.050 421.852 462.435  o  ?  ?  ?  ?
   12   3 -11  12.857  13.178  ? 165.314 173.657  63.074  o  ?  ?  ?  ?
   12   3 -10  10.178  10.798  ? 103.593 116.592  62.108  o  ?  ?  ?  ?
   12   3  -9    .125   1.461  ?    .016   2.134  60.197  <  ?  ?  ?  ?
   12   3  -8  21.349  21.112  ? 455.784 445.702  77.391  o  ?  ?  ?  ?
   12   3  -7  18.986  17.205  ? 360.467 296.012  71.076  o  ?  ?  ?  ?
   12   3  -6  27.206  24.921  ? 740.144 621.037 123.625  o  ?  ?  ?  ?
   12   3  -5    .169   1.354  ?    .028   1.833  49.358  <  ?  ?  ?  ?
   12   3  -4   7.509  11.216  ?  56.391 125.797  49.358  <  ?  ?  ?  ?
   12   3  -3  17.665  16.344  ? 312.058 267.124  61.148  o  ?  ?  ?  ?
   12   3  -2  41.270  39.512  ? 1703.17 1561.23 137.584  o  ?  ?  ?  ?
   12   3  -1  12.664  12.521  ? 160.385 156.776  49.358  o  ?  ?  ?  ?
   12   3   0   6.222   4.103  ?  38.710  16.837  36.579  <  ?  ?  ?  ?
   12   3   1  14.456  14.138  ? 208.969 199.871  42.730  o  ?  ?  ?  ?
   12   3   2  34.764  34.567  ? 1208.53 1194.90 101.609  o  ?  ?  ?  ?
   12   3   3  21.153  19.998  ? 447.433 399.900  57.386  o  ?  ?  ?  ?
   12   3   4   9.083   7.340  ?  82.498  53.876  54.643  <  ?  ?  ?  ?
   12   3   5  10.189  12.205  ? 103.825 148.959  52.852  o  ?  ?  ?  ?
   12   3   6  24.842  24.303  ? 617.120 590.649  75.256  o  ?  ?  ?  ?
   12   3   7  11.581  11.662  ? 134.124 136.001  73.151  o  ?  ?  ?  ?
   12   3   8  17.180  17.048  ? 295.150 290.644 109.133  o  ?  ?  ?  ?
   12   3   9   2.865    .715  ?   8.206    .512 126.357  <  ?  ?  ?  ?
   12   3  10   5.887  14.173  ?  34.660 200.881 136.154  <  ?  ?  ?  ?
   12   3  11   6.500  12.067  ?  42.251 145.602 150.785  <  ?  ?  ?  ?
   12   4 -12   7.456   5.612  ?  55.590  31.497 338.141  <  ?  ?  ?  ?
   12   4 -11    .288   2.969  ?    .083   8.817 262.094  <  ?  ?  ?  ?
   12   4 -10  17.520  17.896  ? 306.960 320.263  75.256  o  ?  ?  ?  ?
   12   4  -9  20.060  19.383  ? 402.389 375.705  80.649  o  ?  ?  ?  ?
   12   4  -8  13.770  13.900  ? 189.615 193.218  65.030  o  ?  ?  ?  ?
   12   4  -7   -.016   3.173  ?    .000  10.069  59.252  <  ?  ?  ?  ?
   12   4  -6  17.567  18.090  ? 308.593 327.231  70.050  o  ?  ?  ?  ?
   12   4  -5  25.172  25.890  ? 633.642 670.310  66.019  o  ?  ?  ?  ?
   12   4  -4  19.701  20.609  ? 388.125 424.747  48.504  o  ?  ?  ?  ?
   12   4  -3    .375   1.963  ?    .141   3.853  36.579  <  ?  ?  ?  ?
   12   4  -2    .332   4.891  ?    .110  23.926  36.579  <  ?  ?  ?  ?
   12   4  -1  19.101  17.995  ? 364.854 323.832  49.358  o  ?  ?  ?  ?
   12   4   0  33.139  33.415  ? 1098.18 1116.56  82.859  o  ?  ?  ?  ?
   12   4   1  15.936  17.471  ? 253.961 305.241  46.817  o  ?  ?  ?  ?
   12   4   2   -.122   2.437  ?    .015   5.939  35.116  <  ?  ?  ?  ?
   12   4   3  12.683  11.873  ? 160.861 140.963  55.550  o  ?  ?  ?  ?
   12   4   4  23.834  24.613  ? 568.044 605.804  82.859  o  ?  ?  ?  ?
   12   4   5  20.383  19.191  ? 415.453 368.280 105.338  o  ?  ?  ?  ?
   12   4   6  12.069  10.219  ? 145.659 104.421  75.256  o  ?  ?  ?  ?
   12   4   7   5.924   7.877  ?  35.098  62.042  71.076  <  ?  ?  ?  ?
   12   4   8  10.828  14.866  ? 117.253 220.998  78.470  o  ?  ?  ?  ?
   12   4   9   9.386  14.194  ?  88.097 201.484  83.975  <  ?  ?  ?  ?
   12   4  10  13.180  15.834  ? 173.713 250.721 238.895  <  ?  ?  ?  ?
   12   5 -11  15.069  14.575  ? 227.060 212.425 351.756  <  ?  ?  ?  ?
   12   5 -10  12.785   6.052  ? 163.460  36.632 307.418  <  ?  ?  ?  ?
   12   5  -9   9.739    .641  ?  94.854    .411 296.800  <  ?  ?  ?  ?
   12   5  -8  13.300  14.542  ? 176.883 211.475  50.221  o  ?  ?  ?  ?
   12   5  -7  24.027  23.608  ? 577.317 557.327  65.030  o  ?  ?  ?  ?
   12   5  -6  15.059  15.411  ? 226.761 237.491  51.967  o  ?  ?  ?  ?
   12   5  -5   7.272   8.793  ?  52.878  77.318  45.984  <  ?  ?  ?  ?
   12   5  -4  10.511  11.629  ? 110.477 135.237  51.090  o  ?  ?  ?  ?
   12   5  -3  31.962  30.834  ? 1021.60 950.714  87.367  o  ?  ?  ?  ?
   12   5  -2  16.433  16.136  ? 270.042 260.357  53.744  o  ?  ?  ?  ?
   12   5  -1  12.099  12.214  ? 146.397 149.192  51.967  o  ?  ?  ?  ?
   12   5   0    .100   2.174  ?    .010   4.728  41.148  <  ?  ?  ?  ?
   12   5   1  18.385  20.159  ? 338.005 406.371  54.643  o  ?  ?  ?  ?
   12   5   2  19.244  20.056  ? 370.346 402.238  69.031  o  ?  ?  ?  ?
   12   5   3  21.136  22.975  ? 446.724 527.857  74.200  o  ?  ?  ?  ?
   12   5   4   5.748   5.820  ?  33.043  33.870  75.256  <  ?  ?  ?  ?
   12   5   5   6.683  10.307  ?  44.656 106.227  78.470  <  ?  ?  ?  ?
   12   5   6  15.516  16.593  ? 240.744 275.332  91.995  o  ?  ?  ?  ?
   12   5   7  16.923  18.909  ? 286.399 357.548  96.742  o  ?  ?  ?  ?
   12   5   8  10.243  12.105  ? 104.915 146.526 111.701  <  ?  ?  ?  ?
   12   5   9    .007   1.545  ?    .000   2.386 197.433  <  ?  ?  ?  ?
   12   6  -8    .321   8.322  ?    .103  69.255 167.740  <  ?  ?  ?  ?
   12   6  -7   6.121    .634  ?  37.473    .402  65.030  <  ?  ?  ?  ?
   12   6  -6   8.921   8.595  ?  79.582  73.881  47.656  <  ?  ?  ?  ?
   12   6  -5  25.993  26.376  ? 675.660 695.701  91.995  o  ?  ?  ?  ?
   12   6  -4  15.855  15.277  ? 251.395 233.391  59.252  o  ?  ?  ?  ?
   12   6  -3  11.240   9.556  ? 126.339  91.317  52.852  o  ?  ?  ?  ?
   12   6  -2   7.750   5.233  ?  60.055  27.381  49.358  <  ?  ?  ?  ?
   12   6  -1  23.909  23.219  ? 571.652 539.126  70.050  o  ?  ?  ?  ?
   12   6   0  13.528  12.847  ? 183.010 165.041  51.967  o  ?  ?  ?  ?
   12   6   1  20.185  18.455  ? 407.421 340.574  75.256  o  ?  ?  ?  ?
   12   6   2   2.132    .292  ?   4.544    .085  76.320  <  ?  ?  ?  ?
   12   6   3  12.735  13.680  ? 162.177 187.130  95.544  o  ?  ?  ?  ?
   12   6   4   9.527  12.364  ?  90.766 152.873  83.975  <  ?  ?  ?  ?
   12   6   5  22.334  22.244  ? 498.828 494.800 158.380  o  ?  ?  ?  ?
   12   6   6   3.201   5.439  ?  10.248  29.579 248.430  <  ?  ?  ?  ?
   12   7  -5    .217   3.344  ?    .047  11.183 102.845  <  ?  ?  ?  ?
   12   7  -4   6.957   5.992  ?  48.394  35.910  61.148  <  ?  ?  ?  ?
   12   7  -3  16.813  18.993  ? 282.687 360.718  71.076  o  ?  ?  ?  ?
   12   7  -2    .329   5.596  ?    .108  31.316  63.074  <  ?  ?  ?  ?
   12   7  -1  15.684  14.289  ? 245.979 204.172  72.110  o  ?  ?  ?  ?
   12   7   0    .054    .423  ?    .003    .179 146.317  <  ?  ?  ?  ?
   12   7   1  13.523  14.865  ? 182.872 220.978 197.433  o  ?  ?  ?  ?
   13   0  -9  27.130  26.700  ? 736.044 712.909 206.111  o  ?  ?  ?  ?
   13   0  -7   -.029    .951  ?    .001    .904 106.595  <  ?  ?  ?  ?
   13   0  -5  34.334  31.272  ? 1178.85 977.940 242.686  o  ?  ?  ?  ?
   13   0  -3  10.612  10.097  ? 112.622 101.954 127.735  <  ?  ?  ?  ?
   13   0  -1  28.887  25.413  ? 834.483 645.830 224.025  o  ?  ?  ?  ?
   13   0   1  28.986  26.024  ? 840.188 677.236 209.634  o  ?  ?  ?  ?
   13   0   3  24.273  25.073  ? 589.170 628.676 182.284  o  ?  ?  ?  ?
   13   0   5  25.417  24.333  ? 646.021 592.116 158.380  o  ?  ?  ?  ?
   13   0   7    .231   7.725  ?    .053  59.680 252.297  <  ?  ?  ?  ?
   13   0   9  21.843  22.968  ? 477.122 527.528 375.045  o  ?  ?  ?  ?
   13   1 -11  25.426  25.202  ? 646.464 635.126 377.415  o  ?  ?  ?  ?
   13   1 -10   5.399   3.977  ?  29.149  15.813 211.407  <  ?  ?  ?  ?
   13   1  -9   4.774   5.846  ?  22.792  34.179  64.048  <  ?  ?  ?  ?
   13   1  -8    .183   3.396  ?    .033  11.536  60.197  <  ?  ?  ?  ?
   13   1  -7  32.848  30.415  ? 1079.02 925.042 126.357  o  ?  ?  ?  ?
   13   1  -6   6.801   6.274  ?  46.249  39.365  61.148  <  ?  ?  ?  ?
   13   1  -5    .234   4.279  ?    .055  18.308  59.252  <  ?  ?  ?  ?
   13   1  -4    .120    .941  ?    .014    .885  62.108  <  ?  ?  ?  ?
   13   1  -3  30.684  26.785  ? 941.488 717.448 110.413  o  ?  ?  ?  ?
   13   1  -2   8.141   9.965  ?  66.282  99.311  66.019  <  ?  ?  ?  ?
   13   1  -1  22.329  22.101  ? 498.592 488.455  93.171  o  ?  ?  ?  ?
   13   1   0    .016   1.093  ?    .000   1.194  57.386  <  ?  ?  ?  ?
   13   1   1  27.039  26.734  ? 731.099 714.724 102.845  o  ?  ?  ?  ?
   13   1   2   8.962   6.511  ?  80.323  42.397  56.464  <  ?  ?  ?  ?
   13   1   3  28.878  24.876  ? 833.963 618.808 100.381  o  ?  ?  ?  ?
   13   1   4   6.454   2.199  ?  41.660   4.837  50.221  <  ?  ?  ?  ?
   13   1   5  13.502  13.311  ? 182.304 177.191  94.354  o  ?  ?  ?  ?
   13   1   6   5.000   4.247  ?  24.997  18.038  70.050  <  ?  ?  ?  ?
   13   1   7  24.920  22.334  ? 621.021 498.822 188.943  o  ?  ?  ?  ?
   13   1   8   5.906   3.954  ?  34.880  15.636 143.376  <  ?  ?  ?  ?
   13   1   9   7.872   2.536  ?  61.966   6.430 153.800  <  ?  ?  ?  ?
   13   2 -10    .346   5.569  ?    .119  31.011 327.001  <  ?  ?  ?  ?
   13   2  -9  27.701  24.572  ? 767.360 603.759 146.317  o  ?  ?  ?  ?
   13   2  -8   5.218   7.599  ?  27.226  57.746  59.252  <  ?  ?  ?  ?
   13   2  -7   1.927    .460  ?   3.713    .211  65.030  <  ?  ?  ?  ?
   13   2  -6    .287   5.752  ?    .083  33.091  70.050  <  ?  ?  ?  ?
   13   2  -5  30.477  27.874  ? 928.873 776.988 114.299  o  ?  ?  ?  ?
   13   2  -4  10.783  10.497  ? 116.278 110.190  68.019  o  ?  ?  ?  ?
   13   2  -3  13.101  11.800  ? 171.631 139.246  67.015  o  ?  ?  ?  ?
   13   2  -2    .133   3.863  ?    .018  14.927  55.550  <  ?  ?  ?  ?
   13   2  -1  26.751  25.922  ? 715.600 671.973 101.609  o  ?  ?  ?  ?
   13   2   0  14.860  12.766  ? 220.815 162.977  72.110  o  ?  ?  ?  ?
   13   2   1  24.680  23.274  ? 609.092 541.670  94.354  o  ?  ?  ?  ?
   13   2   2   4.280   3.913  ?  18.317  15.310  53.744  <  ?  ?  ?  ?
   13   2   3  15.310  17.267  ? 234.396 298.136  65.030  o  ?  ?  ?  ?
   13   2   4  11.151  12.047  ? 124.352 145.123  80.649  o  ?  ?  ?  ?
   13   2   5  27.126  23.689  ? 735.816 561.162 199.154  o  ?  ?  ?  ?
   13   2   6   7.014   4.602  ?  49.194  21.179  80.649  <  ?  ?  ?  ?
   13   2   7    .234    .150  ?    .055    .023  70.050  <  ?  ?  ?  ?
   13   2   8  10.794   9.296  ? 116.501  86.418 351.756  <  ?  ?  ?  ?
   13   3 -10   9.278   6.650  ?  86.080  44.224 541.770  <  ?  ?  ?  ?
   13   3  -9    .169   6.297  ?    .029  39.651 513.704  <  ?  ?  ?  ?
   13   3  -8  10.464   9.617  ? 109.488  92.481 111.701  <  ?  ?  ?  ?
   13   3  -7  24.438  23.377  ? 597.199 546.467 102.845  o  ?  ?  ?  ?
   13   3  -6   8.754  10.518  ?  76.635 110.627  67.015  <  ?  ?  ?  ?
   13   3  -5    .217    .880  ?    .047    .775  60.197  <  ?  ?  ?  ?
   13   3  -4    .292   8.539  ?    .085  72.914  58.316  <  ?  ?  ?  ?
   13   3  -3  20.174  20.254  ? 407.009 410.209  76.320  o  ?  ?  ?  ?
   13   3  -2  14.041  12.079  ? 197.145 145.903  61.148  o  ?  ?  ?  ?
   13   3  -1  19.193  14.879  ? 368.362 221.390  75.256  o  ?  ?  ?  ?
   13   3   0   3.872    .309  ?  14.992    .095  56.464  <  ?  ?  ?  ?
   13   3   1  20.217  19.467  ? 408.722 378.960  77.391  o  ?  ?  ?  ?
   13   3   2  16.739  16.118  ? 280.189 259.778  79.556  o  ?  ?  ?  ?
   13   3   3  22.126  21.140  ? 489.549 446.897 104.087  o  ?  ?  ?  ?
   13   3   4   3.752   5.359  ?  14.076  28.721  81.750  <  ?  ?  ?  ?
   13   3   5   4.888   8.907  ?  23.896  79.333  81.750  <  ?  ?  ?  ?
   13   3   6  12.016  12.098  ? 144.374 146.358  61.148  o  ?  ?  ?  ?
   13   3   7  21.895  23.796  ? 479.383 566.249 133.318  o  ?  ?  ?  ?
   13   3   8  11.681   4.430  ? 136.445  19.621 197.433  <  ?  ?  ?  ?
   13   3   9    .016    .683  ?    .000    .467 187.267  <  ?  ?  ?  ?
   13   4  -9  22.726  15.187  ? 516.464 230.645 735.751  o  ?  ?  ?  ?
   13   4  -8  13.483  10.690  ? 181.802 114.285 544.618  <  ?  ?  ?  ?
   13   4  -7   6.007    .807  ?  36.087    .651 486.384  <  ?  ?  ?  ?
   13   4  -6   7.810   9.388  ?  60.996  88.129  70.050  <  ?  ?  ?  ?
   13   4  -5  20.513  20.603  ? 420.770 424.472  88.513  o  ?  ?  ?  ?
   13   4  -4  17.139  15.668  ? 293.734 245.471  74.200  o  ?  ?  ?  ?
   13   4  -3  11.681   7.421  ? 136.450  55.069  70.050  o  ?  ?  ?  ?
   13   4  -2   1.310   7.965  ?   1.715  63.448  53.744  <  ?  ?  ?  ?
   13   4  -1  17.440  16.057  ? 304.145 257.815  71.076  o  ?  ?  ?  ?
   13   4   0  15.249  15.656  ? 232.529 245.110  71.076  o  ?  ?  ?  ?
   13   4   1  14.156  13.701  ? 200.404 187.710  51.967  o  ?  ?  ?  ?
   13   4   2   3.328   3.184  ?  11.073  10.135  57.386  <  ?  ?  ?  ?
   13   4   3  11.115  11.549  ? 123.554 133.387  69.031  o  ?  ?  ?  ?
   13   4   4  15.598  16.481  ? 243.288 271.608  72.110  o  ?  ?  ?  ?
   13   4   5  16.687  16.547  ? 278.472 273.788 118.251  o  ?  ?  ?  ?
   13   4   6    .305   6.036  ?    .093  36.428  97.948  <  ?  ?  ?  ?
   13   4   7   5.546   2.492  ?  30.760   6.211 100.381  <  ?  ?  ?  ?
   13   5  -8  10.274  13.778  ? 105.549 189.846 618.236  <  ?  ?  ?  ?
   13   5  -7  20.373  13.704  ? 415.065 187.791 769.267  o  ?  ?  ?  ?
   13   5  -6  18.202  14.506  ? 331.311 210.421 533.272  o  ?  ?  ?  ?
   13   5  -5   2.631   5.761  ?   6.924  33.192 340.392  <  ?  ?  ?  ?
   13   5  -4  11.983  11.776  ? 143.604 138.677 101.609  o  ?  ?  ?  ?
   13   5  -3  15.771  16.287  ? 248.734 265.261  78.470  o  ?  ?  ?  ?
   13   5  -2  20.354  17.278  ? 414.302 298.530  89.666  o  ?  ?  ?  ?
   13   5  -1   8.858   9.869  ?  78.460  97.393  67.015  <  ?  ?  ?  ?
   13   5   0    .095   1.499  ?    .009   2.246  64.048  <  ?  ?  ?  ?
   13   5   1   8.626  10.952  ?  74.401 119.954  96.742  <  ?  ?  ?  ?
   13   5   2  19.090  19.170  ? 364.420 367.483 150.785  o  ?  ?  ?  ?
   13   5   3  10.450  12.357  ? 109.204 152.688 214.975  <  ?  ?  ?  ?
   13   5   4    .211   5.502  ?    .044  30.267 204.360  <  ?  ?  ?  ?
   13   5   5   5.517   6.669  ?  30.434  44.481 218.573  <  ?  ?  ?  ?
   13   6  -4  20.475  19.378  ? 419.232 375.520 365.640  o  ?  ?  ?  ?
   13   6  -3   6.832   1.486  ?  46.674   2.208 248.430  <  ?  ?  ?  ?
   13   6  -2   5.489   8.360  ?  30.124  69.895  88.513  <  ?  ?  ?  ?
   13   6  -1   2.509   9.000  ?   6.296  81.008  94.354  <  ?  ?  ?  ?
   13   6   0  21.006  18.847  ? 441.265 355.220 159.921  o  ?  ?  ?  ?
   14   0  -4  21.255  18.430  ? 451.775 339.663 382.178  o  ?  ?  ?  ?
   14   0  -2    .339   4.622  ?    .115  21.360 144.843  <  ?  ?  ?  ?
   14   0   0  25.736  27.267  ? 662.366 743.474 200.882  o  ?  ?  ?  ?
   14   0   2   3.167   1.251  ?  10.032   1.565 126.357  <  ?  ?  ?  ?
   14   0   4  23.710  22.962  ? 562.157 527.262 365.640  o  ?  ?  ?  ?
   14   1  -3   2.869   5.258  ?   8.230  27.646  68.019  <  ?  ?  ?  ?
   14   1  -2  23.704  20.777  ? 561.857 431.688 106.595  o  ?  ?  ?  ?
   14   1  -1    .116   1.678  ?    .013   2.817  70.050  <  ?  ?  ?  ?
   14   1   0   8.988   1.000  ?  80.786    .999  72.110  <  ?  ?  ?  ?
   14   1   1   3.817   2.713  ?  14.571   7.362  65.030  <  ?  ?  ?  ?
   14   1   2  27.418  26.565  ? 751.726 705.706 149.288  o  ?  ?  ?  ?
   14   1   3   9.992   5.876  ?  99.846  34.522  90.827  <  ?  ?  ?  ?
   14   1   4    .262   4.901  ?    .069  24.021 114.299  <  ?  ?  ?  ?
   14   1   5   -.082    .402  ?    .007    .161 111.701  <  ?  ?  ?  ?
   14   2  -3   3.963   3.744  ?  15.708  14.020 318.223  <  ?  ?  ?  ?
   14   2  -2    .306   6.791  ?    .094  46.123 303.148  <  ?  ?  ?  ?
   14   2  -1  10.665   7.717  ? 113.752  59.548  86.229  <  ?  ?  ?  ?
   14   2   0  25.141  23.323  ? 632.087 543.946 141.917  o  ?  ?  ?  ?
   14   2   1    .256   5.496  ?    .065  30.211  91.995  <  ?  ?  ?  ?
   14   2   2   3.465    .861  ?  12.005    .741  88.513  <  ?  ?  ?  ?
   14   2   3   4.349   4.449  ?  18.918  19.793 127.735  <  ?  ?  ?  ?
   14   2   4  20.924  22.359  ? 437.820 499.941 156.846  o  ?  ?  ?  ?
   14   2   5    .297   7.172  ?    .088  51.432  99.161  <  ?  ?  ?  ?
   14   3  -2  18.463  18.794  ? 340.899 353.232 338.141  o  ?  ?  ?  ?
   14   3  -1    .775   6.436  ?    .600  41.416 256.193  <  ?  ?  ?  ?
   14   3   0   5.644   2.624  ?  31.858   6.883 268.062  <  ?  ?  ?  ?
   14   3   1  10.992   7.864  ? 120.824  61.841 182.284  <  ?  ?  ?  ?
   14   3   2  19.556  20.053  ? 382.444 402.128 356.354  o  ?  ?  ?  ?
   14   3   3   8.980   7.939  ?  80.644  63.033 292.605  <  ?  ?  ?  ?
   14   3   4   7.623   3.130  ?  58.115   9.799 294.698  <  ?  ?  ?  ?
   14   3   5    .182   3.896  ?    .033  15.177 266.065  <  ?  ?  ?  ?
   14   4   0  18.367  17.367  ? 337.337 301.628 384.570  o  ?  ?  ?  ?
 
 
#-end-end-end-end-end-end-end-end-end-end-end-end-end-end-end-end-end-end
 
